# Supplementary material for: Dual RNA-Seq of Flavobacterium psychrophilum and Its Outer Membrane Vesicles Distinguishes Genes Associated with Susceptibility to Bacterial Cold-Water Disease in Rainbow Trout (Oncorhynchus mykiss)
Source: MDPI journal article supplement (doi:10.3390/pathogens12030436), 2023-03-10
Supplement: s1 [file s1]

### Supplementary file S4.

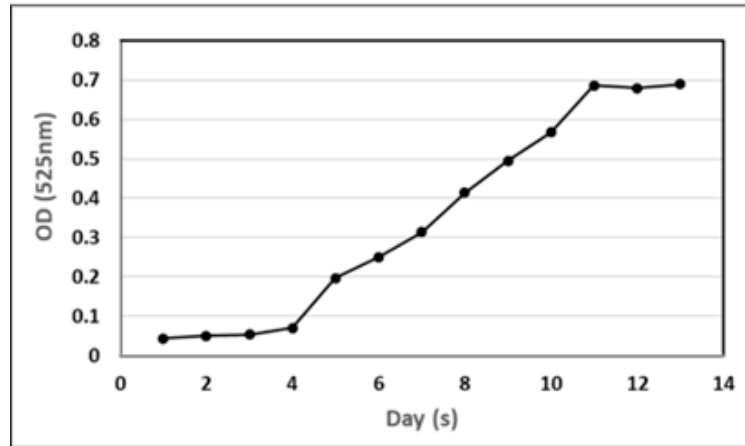

Measurement of *Fp* density by measuring OD in broth culture, the log-phase was observed between days 5 and 11, and day 8 was used for OMV isolation.

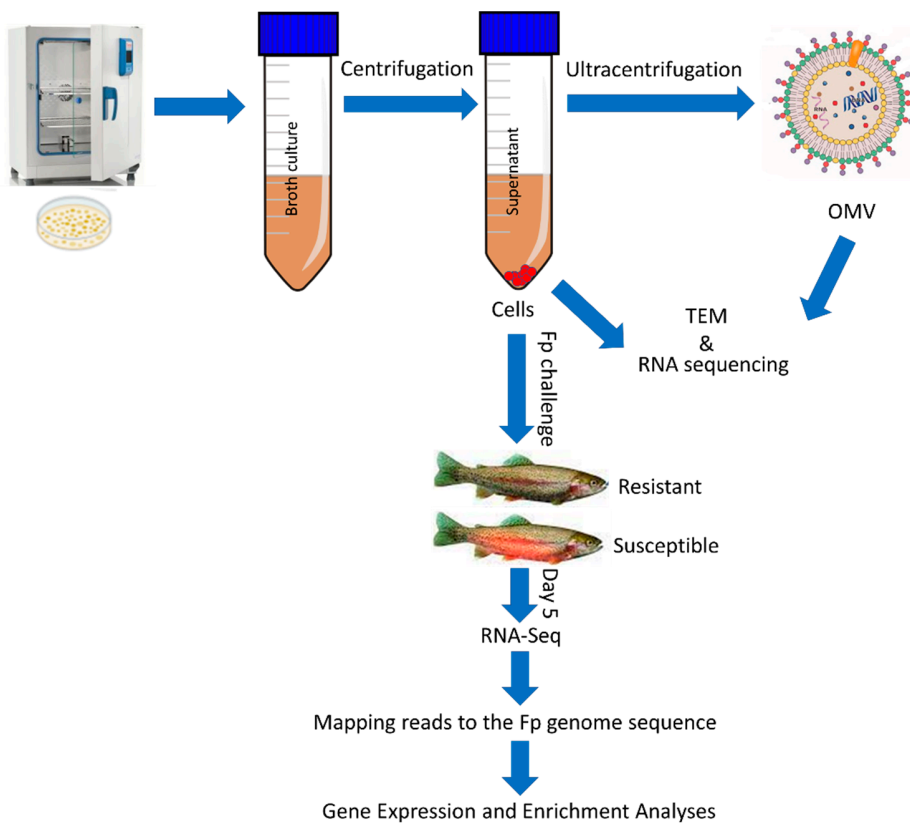

Overview of the experimental design to separate the Fp and OMVs as well as identifying markers associated with disease susceptibility. Fp and OMVs were visualized by the TEM. Whole-cell and OMV-packaged transcripts were sequenced on an Illumina MiSeq platform. Fish from BCWD-resistant and -susceptible genetic lines were intraperitoneally injected with *Fp*. Fish were collected on day 5 post-infection and processed for sequencing. Sequencing reads were mapped to the *Fp* genome sequence followed by gene expression and enrichment analyses.

Table showing sequence read counts and mapping statistics

|                  | Resistant genetic line |               |               |               | Susceptible genetic line |                  |                  |                |
|------------------|------------------------|---------------|---------------|---------------|--------------------------|------------------|------------------|----------------|
|                  | R1                     | R2            | R3            | R4            | S1                       | S2               | S3               | S4             |
| Raw reads        | 47,817,215             | 58,217,219    | 52,507,328    | 33,920,459    | 43,924,736               | 67,089,323       | 43,120,037       | 25,504,398     |
| Trimmed reads    | 47,798,832             | 58,179,320    | 52,494,547    | 33,908,307    | 43,910,762               | 67,062,878       | 43,107,809       | 25,496,664     |
| Reads mapped (%) | 22,634 (0.05)          | 44,416 (0.08) | 15,238 (0.03) | 24,096 (0.07) | 1,026,439 (2.34)         | 1,939,010 (2.89) | 1,317,621 (3.06) | 481,271 (1.89) |
| Reads not mapped | 47,776,198             | 58,134,904    | 52,479,309    | 33,884,211    | 42,884,323               | 65,123,868       | 41,790,188       | 25,015,393     |

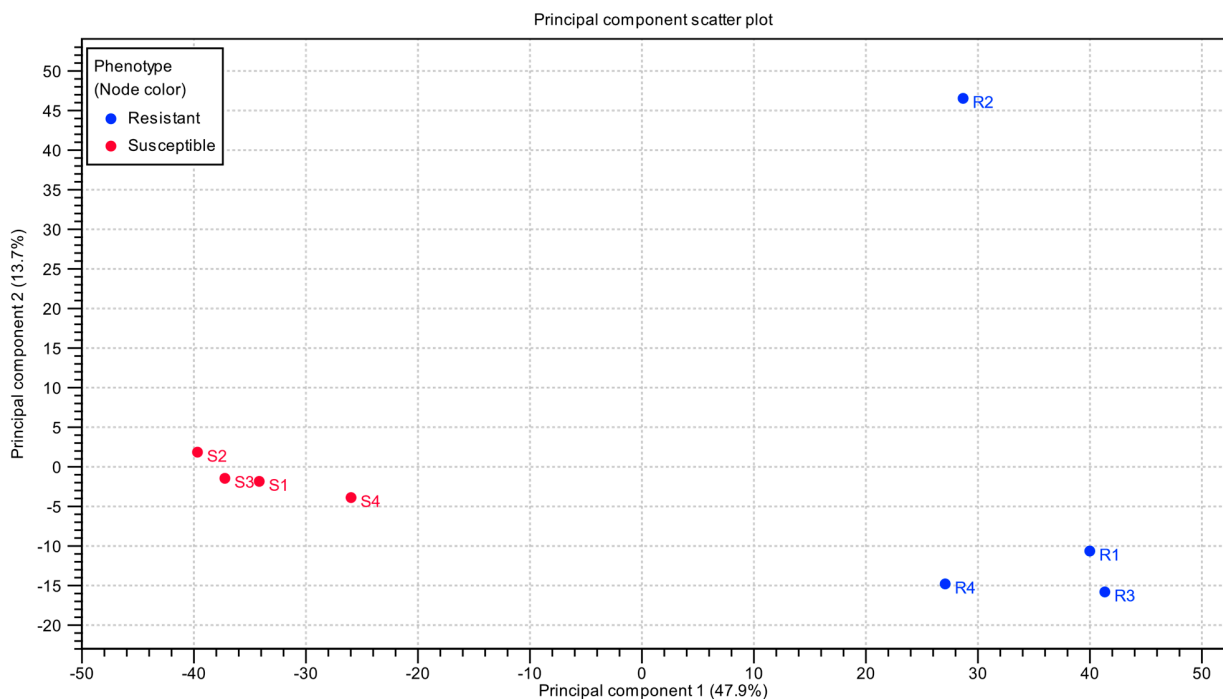

Principal component analysis of eight RNA-seq datasets generated from selectively bred, resistant- and susceptible-line rainbow trout on day 5 post-infection. RNA-seq datasets of each genetic line

are represented in color-coded dots. PCA1 accounts for 47.9% of the variation whereas PCA2 accounts for 13.7%.

Table: Validation of RNA-Seq data by qPCR. qPCR quantification revealed consistency with the RNA-Seq (R = 0.91; p-value 0.002).

| Feature ID   | Gene description                        | qPCR              |          | RNA-Seq           |                        |
|--------------|-----------------------------------------|-------------------|----------|-------------------|------------------------|
|              |                                         | Fold change (R/S) | p-value  | Fold change (R/S) | FDR p-value correction |
| FE46_RS12920 | leucine-rich repeat protein             | -99.26            | 3.68E-03 | -670.98           | 6.26E-04               |
| FE46_RS04860 | isopentenyl-diphosphate Delta-isomerase | -105.60           | 1.83E-05 | -291.40           | 2.90E-03               |
| FE46_RS05480 | Ferredoxin--NADP reductase              | -20.30            | 2.92E-02 | -314.15           | 2.98E-03               |
| FE46_RS05500 | Integration host factor subunit beta    | -185.63           | 4.58E-06 | -955.04           | 1.32E-04               |
| FE46_RS09020 | Cell wall-associated hydrolase          | -39.60            | 4.96E-02 | -1204.81          | 1.52E-03               |
| FE46_RS09040 | 30S ribosomal protein S20               | -25.99            | 5.06E-03 | -302.23           | 4.21E-03               |
| FE46_RS10250 | PspC family transcriptional regulator   | -54.43            | 4.61E-03 | -788.16           | 2.12E-04               |
| FE46_RS11385 | 50S ribosomal L27                       | -404.50           | 6.48E-05 | -5325.84          | 1.99E-06               |
