# Supplementary material for: Dual RNA-Seq of Flavobacterium psychrophilum and Its Outer Membrane Vesicles Distinguishes Genes Associated with Susceptibility to Bacterial Cold-Water Disease in Rainbow Trout (Oncorhynchus mykiss)
Source: Pathogens. 2023 Mar 10;12(3):436. doi: 10.3390/pathogens12030436 (PMC10057207; doi:10.3390/pathogens12030436)
Supplement: Supplementary file 1 [file pathogens-12-00436-s001.zip]

Archive with 4 entries (4 files):
- Supplementary file S1.xlsx
- Supplementary file S2.xlsx
- Supplementary file S3b.xlsx
- Supplementary file S4.pdf
