# Supplementary material for: Dual RNA-Seq of Flavobacterium psychrophilum and Its Outer Membrane Vesicles Distinguishes Genes Associated with Susceptibility to Bacterial Cold-Water Disease in Rainbow Trout (Oncorhynchus mykiss)
Source: Pathogens. 2023 Mar 10;12(3):436. doi: 10.3390/pathogens12030436 (PMC10057207; doi:10.3390/pathogens12030436)
Supplement: Supplementary file 1 [file pathogens-12-00436-s001.zip › Supplementary file S1.xlsx]

## Sheet: Whole-cell
Additional file S1: Transcripts identified in the whole-cell transcriptome
Gene name	RefSeq	CHR	Position	Gene length	TPM	RPKM	Cell/OMV	Gene description
gene2076	FE46_RS10275	NZ_CP007627.1	complement(2336529..2338136)	114705	2361.82	2869.22	781.825	family nutrient-binding outer membrane lipo
gene196	FE46_RS12925	NZ_CP007627.1	complement(234800..235927)	11430	335.496	407.572	779.064	leucine-rich repeat protein
gene1278	FE46_RS06315	NZ_CP007627.1	1455823..1456467	7263	372.826	452.922	495.043	peroxiredoxin
gene736	FE46_RS03645	NZ_CP007627.1	858617..860623	28243	465.922	566.019	444.238	N/A
gene1374	FE46_RS06795	NZ_CP007627.1	1565598..1566296	10680	505.876	614.556	436.767	SDR family oxidoreductase
gene2182	FE46_RS10805	NZ_CP007627.1	2450661..2451284	7498	397.842	483.313	383.296	family NAAT transporter
gene2241	FE46_RS11100	NZ_CP007627.1	2500498..2501655	5321	152.137	184.821	362.677	5-(carboxyamino)imidazole ribonucleotide synthase
gene2371	FE46_RS11745	NZ_CP007627.1	2656432..2657685	8334	220.042	267.315	340.825	NAD(P) FAD-dependent oxidoreductase
gene189	FE46_RS12905	NZ_CP007627.1	complement(226892..227881)	6854	229.223	278.469	280.3	leucine-rich repeat protein
gene16	FE46_RS00085	NZ_CP007627.1	33726..34697	3393	115.576	140.406	231.266	putative cell surface protein SprF
gene457	FE46_RS02255	NZ_CP007627.1	538400..540382	11024	184.063	223.606	223.606	cadmium-translocating P-type ATPase
gene233	FE46_RS01155	NZ_CP007627.1	complement(270010..270708)	2104	99.6594	121.07	215.112	hypothetical protein
gene1669	FE46_RS08255	NZ_CP007627.1	complement(1893227..1895419)	10212	154.178	187.301	208.814	membrane spanning
gene188	FE46_RS12900	NZ_CP007627.1	complement(225818..226876)	5086	159.012	193.174	193.174	leucine-rich repeat protein
gene2071	FE46_RS10250	NZ_CP007627.1	complement(2329944..2330171)	1055	153.203	186.117	186.117	family transcriptional regulator
gene17	FE46_RS00090	NZ_CP007627.1	34826..36013	3610	100.61	122.224	184.542	Phosphoglycerate kinase
gene387	FE46_RS01915	NZ_CP007627.1	458881..460032	5147	147.928	179.709	175.409	phosphate ABC transporter permease subunit
gene1148	FE46_RS05690	NZ_CP007627.1	complement(1306700..1307515)	4279	173.621	210.921	174.993	2,3,4,5-tetrahydropyridine-2,6-dicarboxylate N-succinyltransferase
gene802	FE46_RS03970	NZ_CP007627.1	complement(926395..926784)	1571	133.371	162.024	160.618	DUF983 domain-containing
gene1106	FE46_RS05480	NZ_CP007627.1	complement(1264234..1265289)	2332	73.1163	88.8243	158.948	NAD(P) FAD-dependent oxidoreductase
gene1710	FE46_RS08460	NZ_CP007627.1	complement(1941776..1942582)	9159	375.772	456.501	156.068	Probable lipo precursor
gene2035	FE46_RS10070	NZ_CP007627.1	2285146..2287326	8783	133.333	161.977	149.661	cytochrome-c cbb3-type subunit I
gene243	FE46_RS01205	NZ_CP007627.1	283904..285061	6360	181.844	220.91	144.498	homogentisate 1,2-dioxygenase
gene2592	FE46_RS12835	NZ_CP007627.1	2897163..2897417	1407	182.685	221.933	143.851	hypothetical protein
gene180	FE46_RS12875	NZ_CP007627.1	complement(216850..217773)	12638	452.852	550.141	136.011	leucine-rich repeat protein
gene2590	FE46_RS12825	NZ_CP007627.1	2896480..2896809	22927	2300.29	2794.48	133.945	domain-containing
gene969	FE46_RS04795	NZ_CP007627.1	1111517..1112209	1294	61.8231	75.1049	132.298	NAD-dependent deacylase
gene762	FE46_RS03775	NZ_CP007627.1	885902..886462	3218	189.921	230.723	131.603	transcriptional regulator
gene2250	FE46_RS11145	NZ_CP007627.1	2509643..2512567	15353	173.787	211.123	130.807	aminomethyl-transferring glycine dehydrogenase
gene2252	FE46_RS11155	NZ_CP007627.1	2513173..2514231	3367	105.268	127.883	127.883	ketoacyl-ACP synthase III
gene1642	FE46_RS08120	NZ_CP007627.1	complement(1869358..1869708)	18970	1789.41	2173.84	125.128	4Fe-4S dicluster domain-containing
gene1051	FE46_RS05205	NZ_CP007627.1	complement(1206189..1208579)	5270	72.9761	88.654	119.734	3-hydroxyacyl- dehydrogenase
gene455	FE46_RS02245	NZ_CP007627.1	536005..537273	3709	96.7709	117.561	117.561	acetyl- hydrolase transferase family
gene1315	FE46_RS06500	NZ_CP007627.1	1498044..1498436	569	47.9368	58.2354	116.348	glyoxalase
gene799	FE46_RS03955	NZ_CP007627.1	922551..924080	41763	903.753	1097.91	113.862	gliding motility
gene649	FE46_RS12960	NZ_CP007627.1	772917..773222	544	58.8609	71.5064	111.237	teicoplanin resistance
gene182	FE46_RS12880	NZ_CP007627.1	complement(219509..220705)	2990	82.704	100.472	100.472	leucine-rich repeat protein
gene2446	FE46_RS12110	NZ_CP007627.1	complement(2736777..2737211)	487	37.0672	45.0305	99.5812	hypothetical protein FPSM_02484
gene234	FE46_RS01160	NZ_CP007627.1	complement(270723..271469)	4373	193.824	235.465	99.354	hypothetical protein
gene710	FE46_RS03520	NZ_CP007627.1	833912..835198	3380	86.9536	105.634	98.7341	cell division
gene244	FE46_RS01210	NZ_CP007627.1	285264..286424	2389	68.1292	82.7659	97.7	4-hydroxyphenylpyruvate dioxygenase
gene1012	FE46_RS05010	NZ_CP007627.1	1164485..1166119	2291	46.3935	56.3605	93.6922	S8 family serine peptidase
gene1649	FE46_RS08155	NZ_CP007627.1	complement(1874908..1875219)	436	46.2681	56.2081	89.1528	hypothetical protein
gene1373	FE46_RS06790	NZ_CP007627.1	1565125..1565595	2616	183.894	223.401	89.1528	SRPBCC family
gene1391	FE46_RS06880	NZ_CP007627.1	1588744..1589694	2604	90.6588	110.136	88.7438	isopenicillin N synthase family oxygenase
gene2077	FE46_RS10280	NZ_CP007627.1	complement(2338142..2341324)	48758	507.176	616.136	87.456	family -linked outer membrane
gene255	FE46_RS01265	NZ_CP007627.1	complement(299774..300178)	855	69.8974	84.9138	87.4147	methylmalonyl-CoA epimerase
gene1488	FE46_RS07350	NZ_CP007627.1	complement(1694632..1696020)	1709	40.737	49.4888	87.3636	phosphoglucosamine mutase
glyA	glyA	NZ_CP007627.1	complement(1828427..1829701)	14922	387.495	470.743	87.1781	N/A
gene197	FE46_RS00975	NZ_CP007627.1	complement(235943..236929)	9242	310.026	376.631	85.8997	leucine-rich repeat protein
gene1611	FE46_RS07965	NZ_CP007627.1	1837176..1838084	7086	258.099	313.548	85.2316	TIGR01777 family
gene193	FE46_RS00955	NZ_CP007627.1	complement(232003..233058)	1234	38.6902	47.0022	84.109	leucine-rich repeat protein
gene195	FE46_RS12920	NZ_CP007627.1	complement(233937..234785)	1750	68.2464	82.9082	82.9082	leucine-rich repeat protein
gene104	FE46_RS00525	NZ_CP007627.1	complement(132371..134188)	8602	156.659	190.315	79.9512	DUF4139 domain-containing protein
gene183	FE46_RS12885	NZ_CP007627.1	complement(220721..221644)	1825	65.3944	79.4435	79.4435	leucine-rich repeat protein
gene2242	FE46_RS11105	NZ_CP007627.1	2501689..2502171	765	52.4402	63.7062	78.2132	5-(carboxyamino)imidazole ribonucleotide mutase
gene1909	FE46_RS09445	NZ_CP007627.1	complement(2139825..2140997)	2204	62.2104	75.5755	75.1119	lipo precursor
gene1670	FE46_RS08260	NZ_CP007627.1	1895712..1897598	12740	223.536	271.559	72.3628	T9SS type A sorting domain-containing
gene2181	FE46_RS10800	NZ_CP007627.1	complement(2450167..2450532)	1753	158.581	192.65	71.6903	N/A
gene76	FE46_RS00385	NZ_CP007627.1	complement(97344..98522)	2094	58.8048	71.4381	71.3631	c-type cytochrome
gene708	FE46_RS03510	NZ_CP007627.1	831271..832500	1393	37.4969	45.5526	71.2098	phospho-N-acetylmuramoyl-pentapeptide-transferase
gene1755	FE46_RS08680	NZ_CP007627.1	complement(1983049..1983876)	1729	69.1376	83.9908	70.7088	N/A
gene2034	FE46_RS10065	NZ_CP007627.1	2284103..2285086	1035	34.8253	42.307	70.5452	acyl-ACP desaturase
ssrA	ssrA	NZ_CP007627.1	complement(2046447..2046843)	2705005	225594	274060	69.9174	N/A
rrf_2	rrf_2	NZ_CP007627.1	1440637..1440746	190	57.1887	69.4749	69.4749	N/A
rrf_4	rrf_4	NZ_CP007627.1	complement(2056675..2056784)	186	55.9848	68.0123	68.0123	N/A
gene2104	FE46_RS10415	NZ_CP007627.1	2369170..2369463	327	36.8256	44.7371	66.8646	type II toxin-antitoxin system family toxin
gene689	FE46_RS03415	NZ_CP007627.1	complement(811828..812709)	7752	291.001	353.519	66.0467	Probable lipo precursor
gene294	FE46_RS01445	NZ_CP007627.1	341441..342268	3856	154.19	187.316	65.7059	glutamate dehydrogenase
gene190	FE46_RS00940	NZ_CP007627.1	complement(228208..229404)	12401	343.014	416.706	65.019	leucine-rich repeat protein
gene1846	FE46_RS09130	NZ_CP007627.1	complement(2082700..2083119)	317	24.9896	30.3583	64.8198	lipocalin family
gene1933	FE46_RS09565	NZ_CP007627.1	2163148..2167506	4923	37.3932	45.4266	62.9156	T9SS type B sorting domain-containing
gene1780	FE46_RS08805	NZ_CP007627.1	2015271..2015843	1828	105.626	128.318	62.2979	aminodeoxychorismate anthranilate synthase component II
gene1661	FE46_RS08215	NZ_CP007627.1	complement(1885756..1886406)	906	46.0783	55.9776	61.7526	ABC transporter ATP-binding
gene2015	FE46_RS09975	NZ_CP007627.1	2261959..2262918	2713	93.5682	113.67	61.639	glycosyl transferase family 2
gene703	FE46_RS03485	NZ_CP007627.1	826054..826527	718	50.1529	60.9275	60.9275	division cell wall cluster transcriptional repressor
gene731	FE46_RS03620	NZ_CP007627.1	complement(856194..856484)	3565	405.617	492.758	60.7473	TIGR03643 family
gene712	FE46_RS03530	NZ_CP007627.1	836397..837743	2006	49.3075	59.9005	59.9005	UDP-N-acetylmuramate--L-alanine ligase
gene2043	FE46_RS10110	NZ_CP007627.1	complement(2293050..2295314)	34523	504.65	613.067	59.3212	aconitate hydratase
gene1610	FE46_RS07960	NZ_CP007627.1	1836640..1837092	1739	127.102	154.408	59.2648	DUF4442 domain-containing
gene860	FE46_RS04265	NZ_CP007627.1	complement(999386..1000351)	869	29.7846	36.1834	59.2307	Gfo Idh family oxidoreductase
gene2031	FE46_RS10050	NZ_CP007627.1	complement(2280678..2281358)	9919	482.248	585.852	57.9493	Crp Fnr family transcriptional regulator
gene1136	FE46_RS05630	NZ_CP007627.1	complement(1294317..1295351)	4500	143.953	174.88	57.5097	GDP-mannose 4,6-dehydratase
gene2290	FE46_RS11345	NZ_CP007627.1	complement(2558420..2558962)	1674	102.072	124	57.0496	biopolymer transporter
gene1742	FE46_RS08615	NZ_CP007627.1	complement(1969652..1971547)	3899	68.0871	82.7146	56.9474	DUF3520 domain-containing
gene2038	FE46_RS10085	NZ_CP007627.1	2288541..2289959	1110	25.8994	31.4636	56.7429	cytochrome c oxidase accessory
gene2257	FE46_RS11180	NZ_CP007627.1	2518600..2519367	550	23.7111	28.8051	56.2317	ATP-binding cassette domain-containing
gene1773	FE46_RS08770	NZ_CP007627.1	2008884..2009567	2196	106.298	129.135	56.1294	ATP-binding cassette domain-containing
gene2207	FE46_RS10930	NZ_CP007627.1	complement(2469492..2469860)	5212	467.657	568.127	56.0918	50S ribosomal L14
gene1423	FE46_RS07035	NZ_CP007627.1	complement(1618198..1618911)	539	24.9943	30.3639	55.1071	16S rRNA (cytidine(1402)-2 -O)-methyltransferase
gene2314	FE46_RS11460	NZ_CP007627.1	complement(2585016..2585561)	732	44.3883	53.9245	53.9245	NADH-quinone oxidoreductase subunit B
gene2014	FE46_RS09970	NZ_CP007627.1	2261429..2261959	1826	113.856	138.316	53.3398	DUF4199 domain-containing
gene173	FE46_RS00855	NZ_CP007627.1	208934..209539	22698	1240.12	1506.55	52.149	superoxide dismutase
gene917	FE46_RS04540	NZ_CP007627.1	1062158..1062586	551	42.525	51.6609	51.6609	DUF2147 domain-containing
gene798	FE46_RS03950	NZ_CP007627.1	921853..922503	15454	785.977	954.833	50.968	gliding motility
gene1478	FE46_RS07300	NZ_CP007627.1	complement(1683448..1685328)	120835	2126.93	2583.87	50.0166	molecular chaperone
gene333	FE46_RS01645	NZ_CP007627.1	complement(392009..392500)	483	32.5036	39.4866	49.3816	tryptophan-rich sensory protein
gene704	FE46_RS03490	NZ_CP007627.1	826514..827410	2392	88.2914	107.26	48.9113	16S rRNA (cytosine(1402)-N(4))-methyltransferase
gene386	FE46_RS01910	NZ_CP007627.1	457957..458790	4280	169.913	206.417	48.6205	phosphate ABC transporter substrate-binding
gene728	FE46_RS03605	NZ_CP007627.1	complement(853564..855072)	1410	30.9371	37.5835	48.0525	deoxyribodipyrimidine photo-lyase
gene2329	FE46_RS11540	NZ_CP007627.1	2611672..2612646	1623	55.1142	66.9547	47.4099	tryptophan--tRNA ligase
gene1179	FE46_RS05845	NZ_CP007627.1	complement(1346901..1347374)	7803	545.046	662.141	46.9279	hypothetical protein
gene523	FE46_RS02585	NZ_CP007627.1	complement(609196..610722)	1147	24.8699	30.2128	46.9075	IS1182 family transposase
gene499	FE46_RS02465	NZ_CP007627.1	complement(585052..585876)	18020	723.187	878.553	46.6419	universal stress
gene1049	FE46_RS05195	NZ_CP007627.1	complement(1204448..1205629)	905	25.3502	30.7963	46.2633	acetyl- C-acyltransferase
gene184	FE46_RS12890	NZ_CP007627.1	complement(221660..222718)	1122	35.0789	42.6152	45.8851	leucine-rich repeat protein
gene83	FE46_RS00420	NZ_CP007627.1	complement(105152..107080)	1334	22.8967	27.8158	45.4625	T9SS type A sorting domain-containing protein
gene811	FE46_RS04015	NZ_CP007627.1	935525..938878	18635	183.957	223.477	45.3627	T9SS type A sorting domain-containing
gene929	FE46_RS04595	NZ_CP007627.1	complement(1072130..1073320)	4125	114.673	139.309	44.3934	trans-2-enoyl- reductase family
gene769	FE46_RS03810	NZ_CP007627.1	891049..891741	1952	93.2602	113.296	44.3492	thioredoxin
rrf_5	rrf_5	NZ_CP007627.1	complement(2192115..2192224)	121	36.4202	44.2446	44.2446	N/A
gene1791	FE46_RS08860	NZ_CP007627.1	2026864..2027682	5189	209.773	254.84	44.21	3-deoxy-8-phosphooctulonate synthase
gene1180	FE46_RS05850	NZ_CP007627.1	complement(1347438..1347761)	5165	527.807	641.199	44.0056	family transcriptional regulator
gene2079	FE46_RS10290	NZ_CP007627.1	complement(2342210..2342908)	1716	81.2811	98.7432	43.8607	lipoyl(octanoyl) transferase
gene1736	FE46_RS08590	NZ_CP007627.1	1965193..1966077	1912	71.531	86.8984	43.4404	IS982 family transposase
gene1918	FE46_RS09490	NZ_CP007627.1	2147385..2148269	1684	63.0011	76.5361	43.0428	IS982 family transposase
gene194	FE46_RS12915	NZ_CP007627.1	complement(233074..233922)	629	24.5297	29.7996	42.8724	leucine-rich repeat protein
gene388	FE46_RS01920	NZ_CP007627.1	460036..460983	2509	87.6278	106.453	42.7531	phosphate ABC transporter permease
gene2443	FE46_RS12095	NZ_CP007627.1	complement(2734716..2735492)	616	26.2488	31.888	41.9863	alpha beta hydrolase
gene707	FE46_RS03505	NZ_CP007627.1	829747..831207	1844	41.7888	50.7666	41.8954	UDP-N-acetylmuramoyl-L-alanyl-D-glutamate--2,6-diaminopimelate ligase
gene625	FE46_RS03100	NZ_CP007627.1	complement(739091..739603)	534	34.4646	41.8689	41.8689	hypothetical protein
gene15	FE46_RS00080	NZ_CP007627.1	23702..33679	35980	119.39	145.039	41.3323	T9SS type B sorting domain-containing protein
gene1929	FE46_RS09545	NZ_CP007627.1	complement(2157576..2159648)	6655	106.291	129.127	41.2366	N/A
gene2508	FE46_RS12420	NZ_CP007627.1	2810668..2811696	2414	77.6733	94.3603	41.1343	rod shape-determining
gene2012	FE46_RS09960	NZ_CP007627.1	complement(2259516..2260691)	3206	90.2622	109.654	40.9725	glucose-1-phosphate thymidylyltransferase
gene589	FE46_RS02915	NZ_CP007627.1	691205..691714	596	38.6924	47.0049	40.6231	Hypothetical transmembrane
gene447	FE46_RS02205	NZ_CP007627.1	complement(527349..527735)	992	84.8692	103.102	40.5686	Co2+ Mg2+ efflux
gene359	FE46_RS01775	NZ_CP007627.1	complement(425012..425980)	981	33.5193	40.7204	40.1188	electron transfer flavo subunit alpha family
gene2050	FE46_RS10145	NZ_CP007627.1	complement(2304511..2309631)	12723	82.2592	99.9314	40.0244	DUF11 domain-containing
gene2324	FE46_RS11510	NZ_CP007627.1	2603296..2605092	12289	226.422	275.065	39.8864	elongation factor 4
gene494	FE46_RS02440	NZ_CP007627.1	580926..581534	6601	358.874	435.973	39.699	pyridine nucleotide-disulfide oxidoreductase
gene1504	FE46_RS07430	NZ_CP007627.1	complement(1715492..1716340)	970	37.828	45.9549	39.6689	NAD(P)H-hydrate dehydratase
gene140	FE46_RS00690	NZ_CP007627.1	complement(170591..170776)	182	32.3972	39.3573	39.3573	hypothetical protein
gene1920	FE46_RS09500	NZ_CP007627.1	2148676..2149914	2486	66.4323	80.7044	39.1027	DUF4856 domain-containing
gene250	FE46_RS01240	NZ_CP007627.1	complement(293881..296709)	1711	20.0247	24.3268	38.8737	Psychrophilic metalloprotease Fpp2
gene1818	FE46_RS09000	NZ_CP007627.1	complement(2052025..2052864)	2057	81.0783	98.4968	38.2375	1,4-dihydroxy-2-naphthoyl- synthase
gene1980	FE46_RS09800	NZ_CP007627.1	2219823..2221289	6725	151.779	184.387	38.1978	N/A
gene1056	FE46_RS05230	NZ_CP007627.1	complement(1213560..1214042)	926	63.4766	77.1136	37.8695	peptide-methionine (R)-S-oxide reductase
gene2500	FE46_RS12380	NZ_CP007627.1	2794202..2795413	6108	166.858	202.705	37.8472	2-oxoglutarate dehydrogenase complex dihydrolipoyllysine-residue succinyltransferase
gene2318	FE46_RS11480	NZ_CP007627.1	complement(2594567..2595085)	482	30.7489	37.3548	37.3548	3-hydroxyanthranilate 3,4-dioxygenase
gene1561	FE46_RS07715	NZ_CP007627.1	complement(1772998..1774971)	4009	67.2417	81.6876	37.2616	ribonuclease
gene599	FE46_RS02960	NZ_CP007627.1	700787..701014	211	30.6406	37.2233	37.2233	hypothetical protein
gene2185	FE46_RS10820	NZ_CP007627.1	complement(2452858..2453772)	1091	39.4778	47.9591	37.1811	amidinotransferase
gene186	FE46_RS12895	NZ_CP007627.1	complement(223808..224797)	1635	54.6805	66.4278	37.147	leucine-rich repeat protein
gene437	FE46_RS02160	NZ_CP007627.1	complement(516329..517516)	1083	30.1829	36.6673	36.9084	aspartate aminotransferase
gene2016	FE46_RS09980	NZ_CP007627.1	2263103..2264830	1577	30.216	36.7075	36.7075	phospho-sugar mutase
gene2504	FE46_RS12400	NZ_CP007627.1	complement(2800159..2806185)	11469	63.0049	76.5406	36.6433	T9SS type B sorting domain-containing
gene859	FE46_RS04260	NZ_CP007627.1	complement(998472..999359)	1067	39.7833	48.3302	36.3632	3-hydroxybutyryl- dehydrogenase
gene1038	FE46_RS05140	NZ_CP007627.1	complement(1190042..1190563)	354	22.4534	27.2772	36.1928	superoxide dismutase family
gene2019	FE46_RS09995	NZ_CP007627.1	complement(2267675..2268406)	2606	117.873	143.196	35.5248	Probable lipo precursor
gene2216	FE46_RS10975	NZ_CP007627.1	complement(2473389..2474018)	6770	355.793	432.231	35.4954	50S ribosomal L4
gene813	FE46_RS04025	NZ_CP007627.1	939864..941846	1735	28.9685	35.192	35.192	urocanate hydratase
gene724	FE46_RS03590	NZ_CP007627.1	complement(849190..850617)	2219	51.4492	62.5024	34.903	SDR family oxidoreductase
gene1529	FE46_RS07555	NZ_CP007627.1	complement(1740121..1741071)	677	23.5699	28.6336	34.608	organic solvent ABC transporter substrate-binding
gene2215	FE46_RS10970	NZ_CP007627.1	complement(2473092..2473382)	2867	326.2	396.28	34.4848	50S ribosomal L23
gene648	FE46_RS03210	NZ_CP007627.1	772463..772843	1850	160.767	195.305	34.3896	Glycine cleavage system H
gene791	FE46_RS03915	NZ_CP007627.1	complement(912409..913854)	3818	87.4213	106.203	33.9435	tRNA (N6-isopentenyl adenosine(37)-C2)-methylthiotransferase
gene1357	FE46_RS06710	NZ_CP007627.1	1544675..1546609	993	16.991	20.6412	33.8413	oleate hydratase
gene690	FE46_RS03420	NZ_CP007627.1	812814..813791	822	27.828	33.8065	33.8065	Polyprenyl synthetase
gene2183	FE46_RS10810	NZ_CP007627.1	complement(2451345..2452280)	2310	81.712	99.2667	33.739	amidinotransferase
gene1837	FE46_RS09090	NZ_CP007627.1	complement(2072398..2074575)	1826	27.7583	33.7218	33.7218	radical SAM
gene2591	FE46_RS12830	NZ_CP007627.1	2896809..2897159	4906	462.775	562.196	33.4391	competence
gene398	FE46_RS01970	NZ_CP007627.1	468591..471620	27668	302.332	367.284	33.2795	4Fe-4S dicluster domain-containing
gene816	FE46_RS04040	NZ_CP007627.1	943803..945557	3367	63.5208	77.1673	32.7848	aromatic amino acid hydroxylase
gene2219	FE46_RS10990	NZ_CP007627.1	complement(2475059..2477215)	41536	637.565	774.536	32.4169	elongation factor G
gene1988	FE46_RS09840	NZ_CP007627.1	2227509..2230298	6024	71.4875	86.8456	32.4153	excinuclease ABC subunit
gene1505	FE46_RS07435	NZ_CP007627.1	1716457..1717341	713	26.6745	32.4051	32.4051	IS982 family transposase
gene2333	FE46_RS11555	NZ_CP007627.1	complement(2616162..2617598)	2059	47.4405	57.6324	32.3863	asparagine--tRNA ligase
gene1709	FE46_RS08455	NZ_CP007627.1	complement(1940461..1941504)	2972	94.2536	114.503	31.9848	cytochrome-c peroxidase
gene739	FE46_RS03660	NZ_CP007627.1	861450..863051	13065	270.02	328.03	31.8038	family inorganic anion transporter
gene2478	FE46_RS12270	NZ_CP007627.1	complement(2768101..2768520)	155	12.2189	14.844	31.6942	family
gene2186	FE46_RS10825	NZ_CP007627.1	complement(2453852..2455135)	25731	663.501	806.044	31.3181	citrate synthase
gene1108	FE46_RS05490	NZ_CP007627.1	complement(1265724..1266860)	3285	95.6587	116.21	30.5324	Mrp NBP35 family ATP-binding
gene2032	FE46_RS10055	NZ_CP007627.1	2281467..2283845	1782	24.8006	30.1287	30.3651	HAD-IC family P-type ATPase
gene347	FE46_RS01715	NZ_CP007627.1	complement(411917..412984)	1476	45.7578	55.5882	30.1811	class II fructose-bisphosphate aldolase
gene959	FE46_RS04745	NZ_CP007627.1	1101647..1103068	5891	137.164	166.631	30.1146	MBL fold metallo-hydrolase
gene770	FE46_RS03815	NZ_CP007627.1	891743..892417	504	24.7216	30.0327	30.0327	DUF2461 domain-containing
gene325	FE46_RS01600	NZ_CP007627.1	380340..381167	7134	285.268	346.553	29.7705	M48 family metalloprotease
gene383	FE46_RS01895	NZ_CP007627.1	454728..455414	1163	56.0496	68.0911	29.7261	response regulator transcription factor
gene1819	FE46_RS09005	NZ_CP007627.1	complement(2053004..2053855)	872	33.8865	41.1665	29.7176	family transcriptional regulator
gene2419	FE46_RS11985	NZ_CP007627.1	complement(2710532..2711305)	280	11.9775	14.5507	28.627	5 3 -nucleotidase
gene310	FE46_RS01525	NZ_CP007627.1	complement(362119..363012)	635	23.5172	28.5696	28.5696	IS982 family transposase
gene166	FE46_RS00820	NZ_CP007627.1	196210..197310	3071	92.3511	112.191	28.5434	DUF4407 domain-containing protein
gene771	FE46_RS03820	NZ_CP007627.1	892427..893488	558	17.3964	21.1338	28.5248	glycosyltransferase
gene2335	FE46_RS11565	NZ_CP007627.1	complement(2620472..2621464)	4507	150.275	182.56	27.9269	tRNA dihydrouridine synthase
gene1425	FE46_RS07045	NZ_CP007627.1	1619916..1620524	421	22.8883	27.8056	27.8056	thymidine kinase
gene1375	FE46_RS06800	NZ_CP007627.1	1566459..1567745	810	20.838	25.3148	27.6046	deoxyribodipyrimidine photo-lyase
gene2234	FE46_RS11065	NZ_CP007627.1	2495414..2495875	942	67.5085	82.0118	27.517	peptidoglycan-binding
gene2256	FE46_RS11175	NZ_CP007627.1	2517854..2518600	1326	58.7723	71.3987	27.1139	ABC transporter permease
gene1023	FE46_RS05065	NZ_CP007627.1	complement(1177204..1177617)	279	22.3128	27.1064	27.1064	Holliday junction resolvase
gene2454	FE46_RS12150	NZ_CP007627.1	2745021..2745704	1853	89.6952	108.965	27.0642	zinc metallopeptidase
gene2494	FE46_RS12350	NZ_CP007627.1	complement(2787038..2788381)	9376	230.977	280.599	27.0027	family
gene75	FE46_RS00380	NZ_CP007627.1	complement(96902..97342)	296	22.223	26.9973	26.9973	Rieske 2Fe-2S domain-containing protein
gene1535	FE46_RS07585	NZ_CP007627.1	1749838..1752393	14892	192.904	234.347	26.9478	ATP-dependent Clp protease ATP-binding subunit
gene2499	FE46_RS12375	NZ_CP007627.1	2791256..2794027	6060	72.3817	87.932	26.9379	2-oxoglutarate dehydrogenase E1 component
gene126	FE46_RS00630	NZ_CP007627.1	157144..158145	1712	56.5699	68.7232	26.9283	acyl transferase
gene683	FE46_RS03385	NZ_CP007627.1	806756..807457	2107	99.375	120.724	26.9273	ATP-dependent Clp endopeptidase proteolytic subunit
gene1177	FE46_RS05835	NZ_CP007627.1	complement(1345740..1346156)	784	62.2486	75.6219	26.7186	arsenate reductase
gene1716	FE46_RS08490	NZ_CP007627.1	1946721..1947812	389	11.7944	14.3283	26.5141	methylmalonyl Co-A mutase-associated GTPase
gene2402	FE46_RS11900	NZ_CP007627.1	2695224..2696360	387	11.2694	13.6905	26.3778	type II secretion system F family
gene206	FE46_RS01020	NZ_CP007627.1	244571..245887	52753	1326.21	1611.12	26.3094	adenosylhomocysteinase
gene876	FE46_RS04345	NZ_CP007627.1	complement(1019847..1021376)	4760	103.007	125.136	26.3059	glutamine-hydrolyzing GMP synthase
gene440	FE46_RS02175	NZ_CP007627.1	complement(519492..521117)	7623	155.223	188.57	25.979	L-glutamate gamma-semialdehyde dehydrogenase
gene1010	FE46_RS05000	NZ_CP007627.1	1159146..1161746	32619	415.222	504.426	25.8523	ATP-dependent chaperone
gene2037	FE46_RS10080	NZ_CP007627.1	2287601..2288536	600	21.2239	25.7835	25.7835	c-type cytochrome
gene698	FE46_RS03460	NZ_CP007627.1	complement(821949..822755)	1003	41.1507	49.9913	25.6365	NAD(+) synthase
gene1477	FE46_RS07295	NZ_CP007627.1	1680699..1683003	1116	16.0303	19.4742	25.3554	aminotransferase
gene372	FE46_RS01840	NZ_CP007627.1	complement(442372..443550)	8274	232.355	282.273	25.2516	acyl- dehydrogenase
gene1693	FE46_RS08375	NZ_CP007627.1	1920937..1924698	2831	24.9156	30.2683	25.1687	T9SS type B sorting domain-containing
gene524	FE46_RS02590	NZ_CP007627.1	611425..612912	1346	29.9497	36.3839	25.0208	serine hydrolase
gene1334	FE46_RS06595	NZ_CP007627.1	complement(1519257..1520129)	4153	157.506	191.344	24.9765	succinate-- ligase subunit alpha
gene191	FE46_RS00945	NZ_CP007627.1	complement(229420..230685)	14129	369.511	448.895	24.9059	leucine-rich repeat protein
gene405	FE46_RS02005	NZ_CP007627.1	478786..479472	424	20.4343	24.8243	24.8243	family
gene192	FE46_RS12910	NZ_CP007627.1	complement(230999..231988)	1453	48.5937	59.0334	24.759	leucine-rich repeat protein
gene399	FE46_RS01975	NZ_CP007627.1	471714..473120	9692	228.07	277.068	24.4668	hydrogenase
gene2067	FE46_RS10230	NZ_CP007627.1	complement(2326454..2327350)	3104	114.572	139.186	24.4116	tyrosine-type recombinase integrase
gene2498	FE46_RS12370	NZ_CP007627.1	complement(2790599..2791171)	344	19.8771	24.1474	24.1474	hypothetical protein
rrf_3	rrf_3	NZ_CP007627.1	complement(1633693..1633802)	66	19.8656	24.1334	24.1334	N/A
gene360	FE46_RS01780	NZ_CP007627.1	complement(426130..426876)	3303	146.399	177.851	24.1212	electron transfer flavo subunit beta family
gene726	FE46_RS03600	NZ_CP007627.1	complement(851924..853486)	938	19.8698	24.1385	23.9751	cryptochrome photolyase family
gene1400	FE46_RS06925	NZ_CP007627.1	complement(1596050..1596712)	395	19.7257	23.9635	23.9635	uracil-DNA glycosylase
gene1587	FE46_RS07845	NZ_CP007627.1	1804607..1808260	6310	57.1756	69.4589	23.8937	Phosphoribosylformylglycinamidine synthase
gene498	FE46_RS02460	NZ_CP007627.1	584575..585006	21599	1655.39	2011.02	23.7448	family tellurite resistance
gene1329	FE46_RS06570	NZ_CP007627.1	1513491..1514027	232	14.3042	17.3772	23.7195	DNA polymerase III subunit gamma tau
gene170	FE46_RS00840	NZ_CP007627.1	complement(202752..204149)	32116	760.613	924.02	23.7077	OmpA family protein
gene2058	FE46_RS10185	NZ_CP007627.1	complement(2322913..2323356)	4399	328.035	398.509	23.6711	50S ribosomal L11
gene1039	FE46_RS05145	NZ_CP007627.1	complement(1190649..1192052)	6934	163.518	198.648	23.6309	dihydrolipoyl dehydrogenase
gene865	FE46_RS04290	NZ_CP007627.1	complement(1005734..1006978)	573	15.2382	18.512	23.4333	Lysophospholipase L1 [Flavobacterium psychrophilum DSM 3660]
gene45	FE46_RS00230	NZ_CP007627.1	65733..66752	685	22.2351	27.0121	23.3447	ferrochelatase
gene2045	FE46_RS10120	NZ_CP007627.1	complement(2296551..2297504)	341	11.8347	14.3772	23.2424	family ATPase
gene385	FE46_RS01905	NZ_CP007627.1	456600..457937	1692	41.8691	50.8641	23.0652	phosphate-selective porin
gene1405	FE46_RS06950	NZ_CP007627.1	1604145..1604885	338	15.1025	18.347	23.038	diacylglyceryl transferase
gene2564	FE46_RS12695	NZ_CP007627.1	2870286..2870939	225	11.3908	13.838	23.0039	uracil phosphoribosyltransferase
gene389	FE46_RS01925	NZ_CP007627.1	461078..461836	225	9.815	11.9236	23.0039	phosphate ABC transporter ATP-binding
gene1162	FE46_RS05760	NZ_CP007627.1	1326370..1327356	1012	33.9479	41.2411	22.9925	6-phosphofructokinase
gene1714	FE46_RS08480	NZ_CP007627.1	complement(1943809..1945212)	784	18.4884	22.4603	22.9016	FAD-binding
gene185	FE46_RS00915	NZ_CP007627.1	complement(222734..223792)	1005	31.421	38.1713	22.8335	leucine-rich repeat protein
gene1663	FE46_RS08225	NZ_CP007627.1	1887274..1887654	222	19.292	23.4366	22.6972	hypothetical protein
gene1869	FE46_RS09245	NZ_CP007627.1	complement(2103704..2104474)	666	28.6002	34.7446	22.6972	3 -5 exonuclease
gene1327	FE46_RS06560	NZ_CP007627.1	complement(1511014..1511760)	2196	97.3333	118.244	22.4518	3-oxoacyl-[acyl-carrier- ] reductase
gene1170	FE46_RS05800	NZ_CP007627.1	complement(1337002..1338399)	7104	168.246	204.392	22.348	class II fumarate hydratase
gene595	FE46_RS02940	NZ_CP007627.1	complement(695201..695665)	1408	100.253	121.792	22.1466	DUF4065 domain-containing
gene978	FE46_RS04840	NZ_CP007627.1	1122315..1122851	1838	113.324	137.67	22.1078	bifunctional pyr operon transcriptional regulator uracil phosphoribosyltransferase
gene1307	FE46_RS06460	NZ_CP007627.1	complement(1489769..1491679)	2588	44.8387	54.4717	22.0496	CBS domain-containing
gene351	FE46_RS01735	NZ_CP007627.1	complement(417051..417782)	642	29.0385	35.277	21.8792	bifunctional demethylmenaquinone methyltransferase 2-methoxy-6-polyprenyl-1,4-benzoquinol methylase
gene2089	FE46_RS10340	NZ_CP007627.1	complement(2352893..2353534)	2026	104.485	126.932	21.8039	peptidoglycan-binding
gene92	FE46_RS00465	NZ_CP007627.1	119425..120090	2553	126.919	154.186	21.7514	succinate dehydrogenase cytochrome b subunit
gene2503	FE46_RS12395	NZ_CP007627.1	complement(2799170..2800087)	425	15.3284	18.6215	21.7259	type IX secretion system membrane
gene2412	FE46_RS11950	NZ_CP007627.1	2701915..2703468	8071	171.959	208.903	21.7151	aldehyde dehydrogenase family
gene545	FE46_RS02695	NZ_CP007627.1	641747..642058	168	17.8281	21.6582	21.6582	transposase
sdhA	sdhA	NZ_CP007627.1	120100..122109	7072	116.492	141.519	21.5832	N/A
gene219	FE46_RS01085	NZ_CP007627.1	258168..259418	5803	153.584	186.579	21.5744	beta-ketoacyl-ACP synthase II
gene175	FE46_RS00865	NZ_CP007627.1	211645..212640	316	10.5045	12.7613	21.5384	NAD-dependent epimerase/dehydratase family protein
gene107	FE46_RS00540	NZ_CP007627.1	complement(136803..137090)	632	72.6565	88.2657	21.5384	type II toxin-antitoxin system RelE/ParE family toxin
gene1638	FE46_RS08100	NZ_CP007627.1	complement(1861855..1863711)	2095	37.3527	45.3774	21.4192	type IIA DNA topoisomerase subunit B
gene1845	FE46_RS09125	NZ_CP007627.1	complement(2082402..2082698)	104	11.5938	14.0846	21.2658	DUF721 domain-containing
gene381	FE46_RS01885	NZ_CP007627.1	complement(450312..451523)	5896	161.066	195.669	21.151	lipo
gene525	FE46_RS02595	NZ_CP007627.1	613122..613367	308	41.4539	50.3597	20.9932	hypothetical protein
gene2006	FE46_RS09930	NZ_CP007627.1	complement(2253152..2253859)	407	19.0332	23.1222	20.8057	4-hydroxy-tetrahydrodipicolinate reductase
gene2002	FE46_RS09910	NZ_CP007627.1	2247736..2249859	1089	16.9755	20.6225	20.6225	methylmalonyl- mutase
gene491	FE46_RS02425	NZ_CP007627.1	complement(579311..579880)	704	40.8929	49.6781	20.5647	DUF3109 family
gene748	FE46_RS03705	NZ_CP007627.1	869774..871192	1197	27.9294	33.9296	20.3968	histidine--tRNA ligase
gene1768	FE46_RS08745	NZ_CP007627.1	1999719..2000708	1097	36.6878	44.5696	20.3921	aspartate-semialdehyde dehydrogenase
gene2370	FE46_RS11740	NZ_CP007627.1	complement(2654813..2656333)	1095	23.8361	28.9569	20.3549	aromatic amino acid lyase
gene2200	FE46_RS10895	NZ_CP007627.1	complement(2466347..2466871)	5142	324.282	393.949	20.2198	30S ribosomal S5
gene1973	FE46_RS09765	NZ_CP007627.1	2212580..2213926	492	12.0934	14.6915	20.1207	DEAD DEAH box helicase
gene397	FE46_RS01965	NZ_CP007627.1	467179..468501	5507	137.818	167.426	20.1083	c-type cytochrome
gene2100	FE46_RS10395	NZ_CP007627.1	2364959..2365759	491	20.2954	24.6556	20.0798	23S rRNA pseudouridine(2604) synthase
gene1597	FE46_RS07895	NZ_CP007627.1	complement(1822941..1824119)	1962	55.0979	66.9349	20.0594	phosphoribosylformylglycinamidine cyclo-ligase
gene1101	FE46_RS05455	NZ_CP007627.1	1261833..1262177	294	28.2149	34.2764	20.0389	DUF2853 family
gene1166	FE46_RS05780	NZ_CP007627.1	1330663..1332198	765	16.49	20.0326	20.0326	family Mg chelatase-like AAA ATPase
gene459	FE46_RS02265	NZ_CP007627.1	541343..543166	584	10.6008	12.8782	19.9026	phosphomethylpyrimidine synthase
gene1777	FE46_RS08790	NZ_CP007627.1	2012267..2012899	27589	1443.05	1753.07	19.864	NAD(P)H-dependent oxidoreductase
gene167	FE46_RS00825	NZ_CP007627.1	197731..199023	4829	123.654	150.219	19.7486	aminopeptidase P family protein
gene346	FE46_RS01710	NZ_CP007627.1	complement(411000..411855)	962	37.2093	45.2031	19.6709	acetyl- carboxyltransferase subunit beta
gene392	FE46_RS01940	NZ_CP007627.1	complement(463752..464573)	288	11.6003	14.0925	19.63	UDP-2,3-diacylglucosamine diphosphatase
gene905	FE46_RS04480	NZ_CP007627.1	1050821..1053040	3820	56.9718	69.2114	19.5277	bifunctional (p)ppGpp synthetase guanosine-3 ,5 -bis(diphosphate) 3 -pyrophosphohydrolase
gene1328	FE46_RS06565	NZ_CP007627.1	1512262..1513347	1717	52.3468	63.5928	19.505	DNA polymerase III subunit gamma tau
gene458	FE46_RS02260	NZ_CP007627.1	541038..541244	95	15.1951	18.4595	19.4255	sulfur carrier
gene1557	FE46_RS07695	NZ_CP007627.1	1769936..1770745	190	7.76637	9.43487	19.4255	N-acetylmuramic acid 6-phosphate etherase
gene2445	FE46_RS12105	NZ_CP007627.1	2736166..2736780	380	20.4578	24.8528	19.4255	thioredoxin family
rnpB	rnpB	NZ_CP007627.1	1433177..1433496	82563	8542.5	10377.7	19.405	N/A
gene1332	FE46_RS06585	NZ_CP007627.1	complement(1515190..1517295)	1423	22.3716	27.1778	19.3982	Polyphosphate kinase
gene141	FE46_RS00695	NZ_CP007627.1	complement(170882..171067)	284	50.5539	61.4148	19.3573	hypothetical protein
gene77	FE46_RS00390	NZ_CP007627.1	98613..100484	1796	31.7651	38.5894	19.3286	iron/manganese transporter
gene22	FE46_RS00115	NZ_CP007627.1	41692..43083	753	17.9104	21.7582	19.2466	Cell fate regulator YaaT, PSP1 superfamily (controls sporulation, competence, biofilm development)
gene326	FE46_RS01605	NZ_CP007627.1	381130..381651	282	17.8866	21.7293	19.221	GNAT family N-acetyltransferase
gene1860	FE46_RS09200	NZ_CP007627.1	2097281..2098033	2064	90.7537	110.251	19.1838	triose-phosphate isomerase
gene753	FE46_RS03730	NZ_CP007627.1	876933..877601	655	32.4164	39.3806	19.1334	alpha beta hydrolase
gene725	FE46_RS03595	NZ_CP007627.1	complement(850635..851927)	560	14.3397	17.4203	19.0847	DASH family cryptochrome
gene1355	FE46_RS06700	NZ_CP007627.1	complement(1542875..1543264)	464	39.3915	47.8543	18.9756	family membrane
gene594	FE46_RS02935	NZ_CP007627.1	complement(694831..695208)	641	56.1456	68.2077	18.7244	hypothetical protein
gene1868	FE46_RS09240	NZ_CP007627.1	complement(2103046..2103657)	183	9.90032	12.0273	18.7098	2-hydroxyhepta-2,4-diene-1,7-dioate isomerase
gene2085	FE46_RS10320	NZ_CP007627.1	complement(2349683..2350084)	273	22.4847	27.3152	18.6076	acyl- thioesterase
gene719	FE46_RS03565	NZ_CP007627.1	complement(843647..844306)	818	41.0354	49.8513	18.5849	ribulose-phosphate 3-epimerase
gene1940	FE46_RS09600	NZ_CP007627.1	complement(2175087..2176394)	34460	872.283	1059.68	18.543	ABC transporter
gene2487	FE46_RS12315	NZ_CP007627.1	2777505..2779109	1721	35.5022	43.1294	18.5215	S8 subtilisin family serine endopeptidase
gene408	FE46_RS02020	NZ_CP007627.1	complement(482866..483207)	42107	4076.41	4952.17	18.3974	hypothetical protein
gene894	FE46_RS04425	NZ_CP007627.1	1040502..1041269	719	30.9968	37.6561	18.3775	hypothetical protein
gene706	FE46_RS03500	NZ_CP007627.1	827742..829745	1073	17.7277	21.5362	18.2838	penicillin-binding
gene730	FE46_RS03615	NZ_CP007627.1	complement(855754..856173)	1859	146.548	178.032	18.1012	DUF2452 domain-containing
gene181	FE46_RS00895	NZ_CP007627.1	complement(218087..219493)	3008	70.7837	85.9906	18.0904	leucine-rich repeat protein
gene800	FE46_RS03960	NZ_CP007627.1	924130..925134	59163	1949.1	2367.83	18.0831	gliding motility
gene2291	FE46_RS11350	NZ_CP007627.1	complement(2558982..2559596)	1235	66.4877	80.7717	18.038	biopolymer transporter
gene1779	FE46_RS08800	NZ_CP007627.1	2013758..2015158	1585	37.4577	45.5049	18.0055	anthranilate synthase component I family
gene1566	FE46_RS07740	NZ_CP007627.1	1784094..1784504	6749	543.685	660.488	17.9224	DUF4293 family
gene1873	FE46_RS09265	NZ_CP007627.1	2106634..2107131	349	23.2031	28.1879	17.8408	phosphoribosyltransferase
gene95	FE46_RS00480	NZ_CP007627.1	122636..123400	2002	86.6468	105.262	17.7986	succinate dehydrogenase/fumarate reductase iron-sulfur subunit
gene2213	FE46_RS10960	NZ_CP007627.1	complement(2471973..2472251)	1997	236.986	287.9	17.7541	30S ribosomal S19
gene2409	FE46_RS11935	NZ_CP007627.1	complement(2699214..2699969)	333	14.5838	17.717	17.717	hypothetical protein
gene831	FE46_RS04120	NZ_CP007627.1	complement(963982..967410)	1122	10.8337	13.1611	17.6481	Methylmalonyl- mutase
gene1097	FE46_RS05435	NZ_CP007627.1	complement(1258252..1258527)	86	10.3167	12.533	17.5852	ATP-dependent Clp protease adaptor
gene2094	FE46_RS10365	NZ_CP007627.1	2357186..2358571	30283	723.411	878.826	17.4429	Do family serine endopeptidase
gene2531	FE46_RS12535	NZ_CP007627.1	2834759..2835268	767	49.7938	60.4912	17.4261	acyl- thioesterase
gene1091	FE46_RS05405	NZ_CP007627.1	complement(1255490..1255942)	255	18.6377	22.6417	17.3807	2-dehydro-3-deoxyphosphooctonate aldolase
gene550	FE46_RS02720	NZ_CP007627.1	645086..645889	344	14.1662	17.2096	17.2096	hypothetical protein
gene1815	FE46_RS08985	NZ_CP007627.1	2048247..2049449	336	9.24748	11.2342	17.1762	alanine dehydrogenase
gene1743	FE46_RS08620	NZ_CP007627.1	complement(1971584..1972492)	1172	42.6887	51.8598	17.1178	-dependent outer membrane signature region [Flavobacterium psychrophilum DSM 3660]
gene1751	FE46_RS08660	NZ_CP007627.1	1979792..1981006	251	6.83986	8.30931	17.1081	Bifunctional : Folylpolyglutamate synthase and Dihydrofolate synthase
gene697	FE46_RS03455	NZ_CP007627.1	complement(821232..821861)	1084	56.969	69.208	17.0504	response regulator transcription factor
gene858	FE46_RS04255	NZ_CP007627.1	complement(997210..998442)	250	6.71315	8.15538	17.0399	DUF1015 domain-containing
gene187	FE46_RS00925	NZ_CP007627.1	complement(224813..225802)	1414	47.2894	57.4489	17.0078	leucine-rich repeat protein
gene2008	FE46_RS09940	NZ_CP007627.1	complement(2254437..2255333)	493	18.1972	22.1066	16.8013	Spo0J family partition
gene2567	FE46_RS12710	NZ_CP007627.1	complement(2872136..2873410)	738	19.1644	23.2816	16.7673	phosphoribosylamine--glycine ligase
gene2593	FE46_RS12840	NZ_CP007627.1	complement(2897439..2898422)	7592	255.453	310.333	16.6925	SPFH domain-containing
gene2203	FE46_RS10910	NZ_CP007627.1	complement(2467802..2468200)	5407	448.676	545.068	16.5017	30S ribosomal S8
gene453	FE46_RS02235	NZ_CP007627.1	complement(533514..535175)	562	11.1958	13.6011	16.4167	ATP-binding cassette domain-containing
gene1831	FE46_RS09060	NZ_CP007627.1	2065372..2066385	9854	321.754	390.879	16.3816	Hypothetical lipo precursor
gene164	FE46_RS00810	NZ_CP007627.1	193574..194962	2866	68.3162	82.993	16.2788	dipeptidase
gene1068	FE46_RS05290	NZ_CP007627.1	1227981..1229153	556	15.6937	19.0653	16.2415	proline dehydrogenase
gene2228	FE46_RS11035	NZ_CP007627.1	complement(2488546..2489313)	310	13.3644	16.2356	16.2356	hypothetical protein
gene106	FE46_RS00535	NZ_CP007627.1	complement(136280..136795)	317	20.3404	24.7102	16.2049	hypothetical protein
gene957	FE46_RS04735	NZ_CP007627.1	1100009..1100761	4674	205.515	249.667	16.1989	carboxypeptidase-like regulatory domain-containing
gene472	FE46_RS02330	NZ_CP007627.1	complement(555290..557560)	472	6.88136	8.35973	16.0857	cation H(+) antiporter
gene735	FE46_RS03640	NZ_CP007627.1	858199..858564	235	21.2587	25.8258	16.0175	hypothetical protein
gene2577	FE46_RS12760	NZ_CP007627.1	complement(2883738..2884217)	191	13.1747	16.0051	16.0051	peptidase
gene1970	FE46_RS09750	NZ_CP007627.1	2208434..2209165	290	13.1171	15.9351	15.9351	gliding motility-associated ABC transporter permease subunit
gene1093	FE46_RS05415	NZ_CP007627.1	1256575..1256988	389	31.1099	37.7935	15.9085	transporter
gene1191	FE46_RS05905	NZ_CP007627.1	1358545..1359123	228	13.0378	15.8388	15.8388	DUF1572 domain-containing
gene402	FE46_RS01990	NZ_CP007627.1	474231..475676	4569	104.617	127.093	15.835	quinol:cytochrome C oxidoreductase
gene2493	FE46_RS12345	NZ_CP007627.1	complement(2785877..2787019)	5220	151.208	183.693	15.6968	efflux RND transporter periplasmic adaptor subunit
gene2288	FE46_RS11335	NZ_CP007627.1	complement(2557340..2557570)	76	10.8931	13.2333	15.5404	hypothetical protein
gene1530	FE46_RS07560	NZ_CP007627.1	complement(1741112..1742281)	228	6.45206	7.8382	15.5404	N-acetylmuramoyl-L-alanine amidase
gene1771	FE46_RS08760	NZ_CP007627.1	complement(2003736..2005499)	1138	21.3596	25.9484	15.5131	N/A
gene1190	FE46_RS05900	NZ_CP007627.1	1357354..1358532	227	6.37473	7.74425	15.4722	acetyl- C-acyltransferase
gene2173	FE46_RS10760	NZ_CP007627.1	complement(2439729..2440775)	605	19.1319	23.2421	15.4637	dTDP-glucose 4,6-dehydratase
gene939	FE46_RS04645	NZ_CP007627.1	1081785..1081982	76	12.7086	15.4389	15.4389	hypothetical protein
gene1901	FE46_RS09405	NZ_CP007627.1	2129733..2130731	383	12.6935	15.4206	15.4206	type I glyceraldehyde-3-phosphate dehydrogenase
gene179	FE46_RS00885	NZ_CP007627.1	complement(215396..216523)	17338	508.908	618.24	15.4142	leucine-rich repeat protein
gene2082	FE46_RS10305	NZ_CP007627.1	complement(2346052..2347338)	2110	54.2817	65.9434	15.4089	glutamate-1-semialdehyde 2,1-aminomutase
gene1580	FE46_RS07810	NZ_CP007627.1	1798488..1799087	226	12.4712	15.1504	15.4041	TSA family
gene2105	FE46_RS10420	NZ_CP007627.1	2369469..2369828	301	27.683	33.6303	15.387	helix-turn-helix domain-containing
gene1987	FE46_RS09835	NZ_CP007627.1	complement(2226658..2227242)	971	54.9557	66.7622	15.273	sigma-70 family RNA polymerase sigma factor
gene1065	FE46_RS05275	NZ_CP007627.1	complement(1223994..1224965)	369	12.5693	15.2696	15.2696	deoxyhypusine synthase
gene516	FE46_RS02550	NZ_CP007627.1	604656..605114	518	37.3651	45.3925	15.1314	hypothetical protein
gene400	FE46_RS01980	NZ_CP007627.1	473127..473651	2514	158.546	192.608	15.1194	DUF3341 domain-containing
gene2214	FE46_RS10965	NZ_CP007627.1	complement(2472258..2473082)	9586	384.71	467.359	15.078	50S ribosomal L2
gene1492	FE46_RS07370	NZ_CP007627.1	1700705..1703536	880	10.2882	12.4985	14.9951	ATPase and DNA damage recognition of nucleotide excision repair excinuclease
gene90	FE46_RS00455	NZ_CP007627.1	115999..116241	146	19.8928	24.1665	14.927	ferrous iron transport protein A
gene1690	FE46_RS08360	NZ_CP007627.1	complement(1918033..1919520)	1749	38.9167	47.2775	14.9014	cysteine--tRNA ligase
gene2293	FE46_RS11360	NZ_CP007627.1	2560870..2562375	291	6.39761	7.77205	14.8758	DUF853 family
gene2217	FE46_RS10980	NZ_CP007627.1	complement(2474018..2474635)	5158	276.339	335.707	14.855	50S ribosomal L3
gene1367	FE46_RS06760	NZ_CP007627.1	1558069..1558608	435	26.6714	32.4013	14.8247	family Raf kinase inhibitor
gene1917	FE46_RS13275	NZ_CP007627.1	complement(2147079..2147306)	84	12.1982	14.8188	14.8188	thioredoxin family
gene2265	FE46_RS11220	NZ_CP007627.1	complement(2526385..2527578)	2093	58.0383	70.507	14.7577	type IX secretion system outer membrane channel
gene1430	FE46_RS07070	NZ_CP007627.1	1625733..1626926	2015	55.8754	67.8794	14.7152	alanine dehydrogenase
gene213	FE46_RS01055	NZ_CP007627.1	complement(253386..255284)	932	16.2495	19.7405	14.6596	amidophosphoribosyltransferase
gene1747	FE46_RS08640	NZ_CP007627.1	complement(1974712..1976901)	7713	116.608	141.66	14.6032	glutamine synthetase type III
gene2349	FE46_RS11635	NZ_CP007627.1	complement(2636834..2637202)	71	6.37062	7.73926	14.518	four helix bundle
gene1	FE46_RS00010	NZ_CP007627.1	3326..3748	355	27.7867	33.7563	14.518	rRNA maturation RNase YbeY
gene822	FE46_RS04070	NZ_CP007627.1	complement(953465..954700)	922	24.698	30.004	14.5023	tetracycline resistance MFS efflux pump
gene211	FE46_RS01045	NZ_CP007627.1	252042..252563	1485	94.1902	114.426	14.4596	septal ring lytic transglycosylase RlpA family protein
gene1883	FE46_RS09315	NZ_CP007627.1	complement(2113675..2114211)	4869	300.203	364.698	14.4291	DUF4252 domain-containing
gene1268	FE46_RS06270	NZ_CP007627.1	complement(1447548..1447949)	144	11.86	14.408	14.408	excinuclease ABC subunit B
gene2440	FE46_RS12080	NZ_CP007627.1	2732681..2733556	1051	39.7236	48.2576	14.3272	flavin reductase family
gene1192	FE46_RS12980	NZ_CP007627.1	1359116..1359628	182	11.7464	14.2699	14.2699	family
gene1163	FE46_RS05765	NZ_CP007627.1	1327417..1328418	623	20.5859	25.0085	14.1545	type I glyceraldehyde-3-phosphate dehydrogenase
gene1900	FE46_RS09400	NZ_CP007627.1	2128808..2129680	759	28.7857	34.9699	14.109	lipoyl synthase
gene378	FE46_RS01870	NZ_CP007627.1	447860..448315	757	54.9643	66.7726	14.0719	family
gene157	FE46_RS00775	NZ_CP007627.1	187318..188700	1789	42.829	52.0302	14.0697	integrase
gene2464	FE46_RS12200	NZ_CP007627.1	2756180..2756566	275	23.5273	28.5818	14.0579	DUF423 domain-containing
gene1847	FE46_RS09135	NZ_CP007627.1	2083288..2084373	1785	54.4199	66.1113	14.0383	serine hydrolase
gene1512	FE46_RS07470	NZ_CP007627.1	1722399..1723574	2265	63.7691	77.469	14.0347	acetyl- acetyltransferase
gene1269	FE46_RS06275	NZ_CP007627.1	complement(1447952..1448665)	892	41.3634	50.2498	14.0304	class I SAM-dependent methyltransferase
gene1528	FE46_RS07550	NZ_CP007627.1	complement(1738778..1740103)	480	11.9853	14.5601	14.0214	Fe-S oxidoreductase
gene130	FE46_RS00650	NZ_CP007627.1	160415..160945	137	8.54232	10.3775	14.0068	CvpA family protein
gene705	FE46_RS03495	NZ_CP007627.1	827410..827751	205	19.8462	24.1099	13.9727	S-adenosyl-methyltransferase
gene468	FE46_RS02310	NZ_CP007627.1	549460..550542	205	6.26722	7.61365	13.9727	exopolyphosphatase
gene332	FE46_RS01640	NZ_CP007627.1	390765..392012	433	11.4874	13.9553	13.9553	NAD(P)/FAD-dependent oxidoreductase
gene269	FE46_RS01320	NZ_CP007627.1	complement(312441..313523)	375	11.4644	13.9274	13.9274	3-deoxy-7-phosphoheptulonate synthase
gene1022	FE46_RS05060	NZ_CP007627.1	complement(1175602..1177137)	1293	27.8713	33.859	13.9153	malate:quinone oxidoreductase
gene918	FE46_RS04545	NZ_CP007627.1	1063063..1065513	476	6.43003	7.81144	13.9046	primosomal N
gene574	FE46_RS02840	NZ_CP007627.1	complement(676683..677285)	272	14.9349	18.1434	13.9046	Transposase
gene1832	FE46_RS09065	NZ_CP007627.1	2066456..2067988	5025	108.528	131.844	13.8852	transporter
gene2210	FE46_RS10945	NZ_CP007627.1	complement(2470344..2470769)	3116	242.18	294.208	13.8512	50S ribosomal L16
gene1164	FE46_RS05770	NZ_CP007627.1	1328567..1329412	336	13.1498	15.9748	13.741	N-acetylglucosamine kinase
gene879	FE46_RS04360	NZ_CP007627.1	1023080..1024174	1208	36.526	44.3731	13.7228	peptidylprolyl isomerase
gene256	FE46_RS01270	NZ_CP007627.1	300388..300780	535	45.0724	54.7556	13.6745	30S ribosome-binding factor RbfA
gene2403	FE46_RS11905	NZ_CP007627.1	complement(2696564..2696773)	71	11.1941	13.599	13.599	hypothetical protein
gene89	FE46_RS00450	NZ_CP007627.1	115178..115903	133	6.06547	7.36855	13.5978	SCO family protein
gene1607	FE46_RS07945	NZ_CP007627.1	complement(1833641..1835422)	4104	76.2517	92.6333	13.5352	domain-containing
gene2053	FE46_RS10160	NZ_CP007627.1	complement(2312596..2316912)	16074	123.28	149.765	13.5259	DNA-directed RNA polymerase subunit beta
gene1646	FE46_RS08140	NZ_CP007627.1	1873142..1873792	2975	151.306	183.812	13.5183	DUF937 domain-containing
gene603	FE46_RS02980	NZ_CP007627.1	704481..704867	66	5.64654	6.85962	13.4956	hypothetical protein
gene1543	FE46_RS07625	NZ_CP007627.1	complement(1758355..1759599)	4925	130.974	159.112	13.4274	ornithine--oxo-acid transaminase
gene321	FE46_RS01580	NZ_CP007627.1	complement(374102..375481)	782	18.7619	22.7927	13.3252	TolC family protein
gene2462	FE46_RS12190	NZ_CP007627.1	complement(2754105..2754575)	195	13.7077	16.6526	13.2911	winged helix-turn-helix transcriptional regulator
gene1960	FE46_RS09700	NZ_CP007627.1	complement(2200485..2201435)	1234	42.962	52.1918	13.2804	phosphoribosylaminoimidazolesuccinocarboxamide synthase
gene379	FE46_RS01875	NZ_CP007627.1	448504..449652	9209	265.364	322.374	13.2609	cystathionine gamma-synthase
gene2428	FE46_RS12030	NZ_CP007627.1	2722931..2724247	434	10.9107	13.2547	13.2547	hydroxymethylglutaryl- degradative
gene1651	FE46_RS08165	NZ_CP007627.1	complement(1875941..1876579)	648	33.5756	40.7888	13.2502	peptide-methionine (S)-S-oxide reductase
gene344	FE46_RS01700	NZ_CP007627.1	408097..409011	453	16.3918	19.9134	13.2327	type IX secretion system membrane
gene590	FE46_RS02920	NZ_CP007627.1	691855..692199	129	12.38	15.0397	13.1889	hypothetical protein
gene937	FE46_RS04635	NZ_CP007627.1	1079847..1080626	772	32.7697	39.8098	13.1548	3-cyclic phosphodiesterase
gene2525	FE46_RS12505	NZ_CP007627.1	complement(2829609..2830334)	237	10.8084	13.1304	13.1304	type III pantothenate kinase
gene2184	FE46_RS13285	NZ_CP007627.1	complement(2452491..2452703)	64	9.94833	12.0856	13.0866	four helix bundle
gene1044	FE46_RS05170	NZ_CP007627.1	1198730..1200937	27959	419.249	509.319	13.0526	catalase peroxidase HPI
gene2112	FE46_RS10455	NZ_CP007627.1	2376116..2377039	191	6.84402	8.31436	13.0185	family sugar-phosphate isomerase
gene313	FE46_RS01540	NZ_CP007627.1	complement(364415..365044)	190	9.98534	12.1305	12.9503	porin family protein
gene257	FE46_RS01275	NZ_CP007627.1	300782..301981	1330	36.6961	44.5798	12.9503	ABC transporter permease
gene2520	FE46_RS12480	NZ_CP007627.1	2823497..2825038	1202	25.8089	31.3536	12.936	glycine--tRNA ligase
gene2212	FE46_RS10955	NZ_CP007627.1	complement(2471553..2471966)	4110	328.694	399.309	12.9294	50S ribosomal L22
gene2541	FE46_RS12585	NZ_CP007627.1	complement(2844638..2845648)	441	14.4423	17.5451	12.8822	nucleotidyltransferase
gene368	FE46_RS01820	NZ_CP007627.1	complement(439392..440078)	219	10.5545	12.822	12.822	Probable lipo precursor
gene1631	FE46_RS08065	NZ_CP007627.1	complement(1853798..1854784)	313	10.4997	12.7554	12.8004	D-alanine--D-alanine ligase
gene2211	FE46_RS10950	NZ_CP007627.1	complement(2470790..2471551)	11884	516.366	627.3	12.7896	30S ribosomal S3
gene74	FE46_RS00375	NZ_CP007627.1	complement(95673..96905)	392	10.5262	12.7876	12.7876	hypothetical protein
gene2368	FE46_RS11730	NZ_CP007627.1	complement(2652699..2653430)	187	8.45824	10.2754	12.7458	3-oxoacyl-ACP reductase
gene1011	FE46_RS05005	NZ_CP007627.1	complement(1162277..1163968)	4924	96.3535	117.054	12.745	energy-dependent translational throttle
gene110	FE46_RS00555	NZ_CP007627.1	complement(138712..139992)	372	9.61487	11.6805	12.6777	histidine kinase
gene1724	FE46_RS08530	NZ_CP007627.1	1956061..1956648	248	13.9645	16.9645	12.6777	RNAase
gene49	FE46_RS00250	NZ_CP007627.1	complement(69598..70245)	204	10.4233	12.6626	12.6626	HD domain-containing protein
gene490	FE46_RS02420	NZ_CP007627.1	complement(578086..579063)	557	18.8567	22.9078	12.655	ribonucleoside-diphosphate reductase
gene1298	FE46_RS06415	NZ_CP007627.1	complement(1475369..1475848)	5487	378.48	459.792	12.6065	universal stress
gene1033	FE46_RS05115	NZ_CP007627.1	complement(1185217..1186284)	3192	98.9558	120.215	12.5519	branched-chain amino acid aminotransferase
gene842	FE46_RS04175	NZ_CP007627.1	975533..976996	6690	151.299	183.803	12.5501	aminoacyl-histidine dipeptidase
gene117	FE46_RS00590	NZ_CP007627.1	146923..149757	1224	14.2948	17.3658	12.5141	TonB-dependent receptor
gene434	FE46_RS02145	NZ_CP007627.1	complement(513455..514327)	366	13.8809	16.863	12.4732	ACP S-malonyltransferase
gene431	FE46_RS02130	NZ_CP007627.1	510525..511658	974	28.4378	34.5472	12.4477	1 family aminotransferase
gene961	FE46_RS04755	NZ_CP007627.1	1103400..1103597	243	40.6341	49.3638	12.4221	Hypothetical transmembrane
gene1994	FE46_RS09870	NZ_CP007627.1	complement(2238713..2239975)	425	11.1413	13.5348	12.4148	asparagine synthetase B
gene1098	FE46_RS05440	NZ_CP007627.1	complement(1258568..1259401)	362	14.3712	17.4586	12.3369	50S ribosomal L11 methyltransferase
gene1858	FE46_RS09190	NZ_CP007627.1	2095674..2096777	3133	93.9596	114.145	12.3199	tlpB
gene789	FE46_RS03910	NZ_CP007627.1	complement(910667..911923)	1024	26.9721	32.7666	12.3168	sigma-54-dependent Fis family transcriptional regulator
gene2057	FE46_RS10180	NZ_CP007627.1	complement(2322221..2322910)	13994	671.494	815.756	12.281	50S ribosomal L1
gene1930	FE46_RS09550	NZ_CP007627.1	2159746..2160660	5462	197.642	240.103	12.2732	hypothetical protein
gene1662	FE46_RS08220	NZ_CP007627.1	1886701..1887243	120	7.31697	8.88891	12.2687	sigma-70 family RNA polymerase sigma factor
gene1398	FE46_RS06915	NZ_CP007627.1	1594098..1594943	240	9.3927	11.4106	12.2687	ABC transporter substrate-binding
gene2481	FE46_RS12285	NZ_CP007627.1	2770605..2771951	1556	38.2465	46.4632	12.2373	serine hydrolase
gene2117	FE46_RS10480	NZ_CP007627.1	complement(2380456..2381169)	238	11.0364	13.4074	12.1665	phosphatidylserine synthase
gene103	FE46_RS00520	NZ_CP007627.1	130743..131891	3332	96.014	116.641	12.1665	thiol-activated cytolysin
gene825	FE46_RS04090	NZ_CP007627.1	complement(957412..958212)	178	7.35762	8.9383	12.1324	TPM domain-containing
gene486	FE46_RS02400	NZ_CP007627.1	complement(572734..573534)	4859	200.846	243.995	12.1166	30S ribosomal S2
gene2243	FE46_RS11110	NZ_CP007627.1	2502315..2504341	829	13.541	16.4501	12.1081	Oligopeptidase A
gene1330	FE46_RS06575	NZ_CP007627.1	complement(1514040..1514252)	64	9.94833	12.0856	12.0856	hypothetical protein
gene2422	FE46_RS12000	NZ_CP007627.1	complement(2715789..2716361)	2125	122.787	149.167	12.0699	thioredoxin fold domain-containing
gene2049	FE46_RS10140	NZ_CP007627.1	complement(2303545..2304459)	413	14.9444	18.155	12.0643	type IX secretion system membrane
gene754	FE46_RS03735	NZ_CP007627.1	877776..878663	176	6.5622	7.97199	11.9961	lytic transglycosylase domain-containing
gene1440	FE46_RS07115	NZ_CP007627.1	1632447..1633412	1349	46.2364	56.1697	11.9931	IS1595 family transposase
gene932	FE46_RS04610	NZ_CP007627.1	complement(1075950..1077158)	1055	28.8919	35.0989	11.9847	bifunctional phosphopantothenoylcysteine decarboxylase phosphopantothenate--cysteine ligase
gene487	FE46_RS02405	NZ_CP007627.1	complement(573688..574074)	1465	125.336	152.263	11.9825	30S ribosomal S9
gene1701	FE46_RS08415	NZ_CP007627.1	complement(1932397..1932771)	1399	123.52	150.056	11.9194	hypothetical protein
gene390	FE46_RS01930	NZ_CP007627.1	461875..462603	216	9.81016	11.9177	11.9177	phosphate signaling complex
gene2413	FE46_RS11955	NZ_CP007627.1	complement(2704198..2705244)	987	31.2119	37.9173	11.8718	thiamine-phosphate kinase
gene2331	FE46_RS11545	NZ_CP007627.1	complement(2613420..2613872)	174	12.7175	15.4496	11.8598	6-carboxytetrahydropterin synthase
gene1944	FE46_RS09620	NZ_CP007627.1	2178572..2180471	29918	521.349	633.354	11.8329	molecular chaperone
gene2080	FE46_RS10295	NZ_CP007627.1	2343217..2344908	2079	40.6821	49.4221	11.8087	lysine--tRNA ligase
gene583	FE46_RS02885	NZ_CP007627.1	685950..686150	59	9.71864	11.8066	11.8066	hypothetical protein
gene1358	FE46_RS06715	NZ_CP007627.1	1546725..1547609	258	9.65219	11.7258	11.7258	3-hydroxyacyl- dehydrogenase
gene1516	FE46_RS07490	NZ_CP007627.1	complement(1725224..1726486)	860	22.5447	27.3881	11.7235	cation:dicarboxylase symporter family transporter
gene1174	FE46_RS05820	NZ_CP007627.1	1342476..1343429	343	11.9041	14.4615	11.6894	CPBP family intramembrane metalloprotease
gene2484	FE46_RS12300	NZ_CP007627.1	complement(2774455..2775903)	7144	163.239	198.308	11.6864	Fe-S cluster assembly
gene218	FE46_RS01080	NZ_CP007627.1	complement(257859..258101)	57	7.76637	9.43487	11.6553	hypothetical protein
gene2208	FE46_RS10935	NZ_CP007627.1	complement(2469863..2470123)	1652	209.565	254.587	11.6482	30S ribosomal S17
gene404	FE46_RS02000	NZ_CP007627.1	476899..478704	8681	159.148	193.339	11.6018	cytochrome c oxidase subunit I
gene5	FE46_RS00030	NZ_CP007627.1	8503..10983	5332	71.1562	86.4432	11.5987	T9SS type A sorting domain-containing protein
gene1009	FE46_RS04995	NZ_CP007627.1	1157044..1158921	4479	78.9651	95.9296	11.5932	DUF349 domain-containing
gene1793	FE46_RS08870	NZ_CP007627.1	2028870..2029835	1359	46.5792	56.5861	11.5786	IS1595 family transposase
gene2027	FE46_RS10030	NZ_CP007627.1	2277281..2278021	396	17.694	21.4953	11.5677	rhomboid family intramembrane serine protease
gene1548	FE46_RS07650	NZ_CP007627.1	1762672..1764087	407	9.51658	11.5611	11.5611	23S rRNA (uracil(1939)-C(5))-methyltransferase
gene2106	FE46_RS10425	NZ_CP007627.1	complement(2369854..2370651)	281	11.6588	14.1635	11.4917	mechanosensitive ion channel
gene1383	FE46_RS06840	NZ_CP007627.1	complement(1574797..1576854)	587	9.4437	11.4726	11.4726	tetratricopeptide repeat
gene1343	FE46_RS06640	NZ_CP007627.1	complement(1527602..1528327)	207	9.44025	11.4684	11.4684	3-deoxy-manno-octulosonate cytidylyltransferase
gene365	FE46_RS01805	NZ_CP007627.1	complement(432867..433910)	1062	33.6801	40.9158	11.4293	peptidase S66
gene2062	FE46_RS10205	NZ_CP007627.1	complement(2324328..2325515)	59733	1664.74	2022.39	11.4044	elongation factor Tu
gene942	FE46_RS04660	NZ_CP007627.1	1085581..1086579	943	31.2533	37.9676	11.3426	glycosyl transferase family 2
gene177	FE46_RS00875	NZ_CP007627.1	complement(213064..214401)	608	15.0452	18.2774	11.3021	dihydroorotase
gene320	FE46_RS01575	NZ_CP007627.1	complement(373095..374093)	279	9.24673	11.2333	11.2333	biotin/lipoyl-binding protein
gene1428	FE46_RS07060	NZ_CP007627.1	1623637..1625190	3842	81.857	99.4429	11.223	bifunctional response regulator alkaline phosphatase family
gene2326	FE46_RS11525	NZ_CP007627.1	2606352..2609270	383	4.34425	5.27755	11.1879	T9SS sorting signal type C domain-containing
gene1643	FE46_RS08125	NZ_CP007627.1	1869810..1870868	490	15.3197	18.6109	11.1327	acyl- reductase
gene339	FE46_RS01670	NZ_CP007627.1	396283..397191	4299	156.586	190.226	11.1273	rRNA pseudouridine synthase
gene1359	FE46_RS06720	NZ_CP007627.1	1547634..1549235	442	9.13502	11.0975	11.0975	oleate hydratase
gene2369	FE46_RS11735	NZ_CP007627.1	complement(2653615..2654772)	217	6.20441	7.53735	11.093	WG repeat-containing
gene709	FE46_RS03515	NZ_CP007627.1	832502..833833	595	14.7898	17.9672	11.0604	UDP-N-acetylmuramoyl-L-alanine--D-glutamate ligase
gene827	FE46_RS04100	NZ_CP007627.1	complement(958728..959315)	1298	73.0882	88.7901	11.0589	family
gene2093	FE46_RS10360	NZ_CP007627.1	complement(2356141..2356911)	108	4.63787	5.63426	11.0419	diaminopimelate epimerase
gene366	FE46_RS01810	NZ_CP007627.1	complement(434001..438527)	863	6.31175	7.66774	11.0291	DNA polymerase III subunit alpha
gene1620	FE46_RS08010	NZ_CP007627.1	complement(1845387..1846034)	593	30.2991	36.8084	11.0233	orotate phosphoribosyltransferase
gene1299	FE46_RS06420	NZ_CP007627.1	complement(1476099..1477262)	322	9.15909	11.1268	10.9737	glycosyltransferase
gene1946	FE46_RS09630	NZ_CP007627.1	2183159..2184547	427	10.1783	12.365	10.9141	DUF1800 domain-containing
gene1555	FE46_RS07685	NZ_CP007627.1	1768799..1769467	159	7.86902	9.55957	10.8374	ZIP family metal transporter
gene2359	FE46_RS11685	NZ_CP007627.1	complement(2645110..2645514)	53	4.33282	5.26366	10.8374	hypothetical protein
gene938	FE46_RS04640	NZ_CP007627.1	1080664..1081581	318	11.4692	13.9332	10.8374	5 -nucleotidase
gene979	FE46_RS04845	NZ_CP007627.1	1122853..1123779	897	32.0378	38.9206	10.7893	aspartate carbamoyltransferase
gene88	FE46_RS00445	NZ_CP007627.1	complement(111687..115106)	915	8.85818	10.7612	10.7612	T9SS type A sorting domain-containing protein
gene50	FE46_RS00255	NZ_CP007627.1	complement(70317..71306)	995	33.2765	40.4255	10.7082	acyl-ACP desaturase
gene327	FE46_RS01610	NZ_CP007627.1	381924..383177	1569	41.4262	50.326	10.6942	aspartate kinase
gene2420	FE46_RS11990	NZ_CP007627.1	2711457..2713634	6262	95.193	115.644	10.6704	tail-specific protease
gene1975	FE46_RS09775	NZ_CP007627.1	2215985..2217238	156	4.11886	5.00374	10.6329	Dihydroorotase
gene21	FE46_RS00110	NZ_CP007627.1	40163..41521	1243	30.2832	36.7891	10.5903	rhodanese-related sulfurtransferase
gene2455	FE46_RS12155	NZ_CP007627.1	complement(2745920..2746339)	1294	102.008	123.923	10.5838	Probable lipo precursor
gene1433	FE46_RS13230	NZ_CP007627.1	1627770..1628062	155	17.5151	21.278	10.5647	DDE transposase
gene908	FE46_RS04495	NZ_CP007627.1	1055502..1055921	103	8.11966	9.86405	10.5307	N/A
gene2115	FE46_RS10470	NZ_CP007627.1	2378276..2379016	309	13.8067	16.7729	10.5307	LPS export ABC transporter ATP-binding
gene663	FE46_RS03285	NZ_CP007627.1	786333..787001	359	17.7672	21.5842	10.4868	tRNA (adenosine(37)-N6)-threonylcarbamoyltransferase complex dimerization subunit type 1
gene91	FE46_RS00460	NZ_CP007627.1	116241..118334	769	12.159	14.7712	10.4829	ferrous iron transport protein B
gene2327	FE46_RS11530	NZ_CP007627.1	2609709..2610713	1987	65.4608	79.5242	10.4179	recombinase
gene1941	FE46_RS09605	NZ_CP007627.1	complement(2176397..2177068)	6965	343.164	416.888	10.3956	family transcriptional regulator
gene1708	FE46_RS08450	NZ_CP007627.1	complement(1939492..1940454)	1872	64.362	78.1892	10.3455	transporter
gene2109	FE46_RS10440	NZ_CP007627.1	complement(2372535..2372786)	101	13.27	16.1209	10.3262	hypothetical protein
gene2220	FE46_RS10995	NZ_CP007627.1	complement(2477226..2477702)	3017	209.414	254.404	10.2819	30S ribosomal S7
gene1927	FE46_RS09535	NZ_CP007627.1	complement(2156410..2157054)	3652	187.465	227.74	10.2295	lipo
gene744	FE46_RS03685	NZ_CP007627.1	complement(865813..866820)	300	9.85395	11.9709	10.2239	bifunctional diaminohydroxyphosphoribosylaminopyrimidine deaminase 5-amino-6-(5-phosphoribosylamino)uracil reductase
gene844	FE46_RS04185	NZ_CP007627.1	978786..979853	150	4.65018	5.6492	10.2239	anhydro-N-acetylmuramic acid kinase
gene1279	FE46_RS06320	NZ_CP007627.1	complement(1456589..1457056)	150	10.6119	12.8918	10.2239	DUF983 domain-containing
gene9	FE46_RS00050	NZ_CP007627.1	complement(15603..15986)	399	34.4026	41.7935	10.1984	DoxX family protein
gene633	FE46_RS03135	NZ_CP007627.1	748967..749677	995	46.3344	56.2886	10.1728	murein L,D-transpeptidase catalytic domain family
gene674	FE46_RS03340	NZ_CP007627.1	complement(798742..799425)	594	28.7528	34.9299	10.1217	inorganic polyphosphate kinase
gene1599	FE46_RS07905	NZ_CP007627.1	complement(1825182..1826135)	693	24.0511	29.2181	10.1217	transketolase
gene1952	FE46_RS09660	NZ_CP007627.1	complement(2191160..2191912)	247	10.8605	13.1938	10.1013	response regulator transcription factor
gene19	FE46_RS00100	NZ_CP007627.1	38272..38721	113	8.31411	10.1003	10.1003	GNAT family N-acetyltransferase
gene361	FE46_RS01785	NZ_CP007627.1	427078..428055	1224	41.4374	50.3396	10.0113	pyruvate dehydrogenase complex E1 component subunit beta
gene1048	FE46_RS05190	NZ_CP007627.1	complement(1202495..1204285)	1416	26.1768	31.8006	9.98421	acyl- dehydrogenase
gene617	FE46_RS03050	NZ_CP007627.1	complement(726310..727545)	878	23.5194	28.5722	9.97402	tetracycline resistance MFS efflux pump
gene840	FE46_RS04165	NZ_CP007627.1	973078..974382	194	4.92199	5.97941	9.91722	NAD(P) FAD-dependent oxidoreductase
gene2313	FE46_RS11455	NZ_CP007627.1	complement(2584490..2585011)	145	9.19702	11.1729	9.88314	NADH-quinone oxidoreductase subunit C
gene31	FE46_RS00160	NZ_CP007627.1	complement(53537..54250)	145	6.72387	8.1684	9.88314	3'-5' exonuclease
gene2054	FE46_RS10165	NZ_CP007627.1	complement(2317205..2321017)	13380	116.182	141.142	9.87699	DNA-directed RNA polymerase subunit beta
gene1674	FE46_RS08280	NZ_CP007627.1	complement(1901585..1903132)	1304	27.8905	33.8824	9.87557	replicative DNA helicase
gene797	FE46_RS03945	NZ_CP007627.1	920408..921802	5694	135.143	164.176	9.86697	gliding motility lipo
gene2584	FE46_RS12795	NZ_CP007627.1	2889749..2891923	6913	105.234	127.842	9.74871	ribonuclease R
gene2095	FE46_RS10370	NZ_CP007627.1	2358824..2360272	8247	188.442	228.926	9.69159	glyceraldehyde-3-phosphate dehydrogenase
gene2472	FE46_RS12240	NZ_CP007627.1	complement(2762993..2764042)	378	11.9193	14.48	9.66163	4-hydroxythreonine-4-phosphate dehydrogenase
gene30	FE46_RS00155	NZ_CP007627.1	complement(51982..53421)	377	8.66819	10.5304	9.63607	spore maturation protein
gene118	FE46_RS00595	NZ_CP007627.1	149859..151358	1083	23.9049	29.0405	9.62829	G-D-S-L family lipolytic protein
gene1468	FE46_RS07250	NZ_CP007627.1	complement(1668996..1670021)	2825	91.1634	110.749	9.62755	Threonine aldolase
gene780	FE46_RS03865	NZ_CP007627.1	complement(900786..901742)	141	4.87817	5.92618	9.61051	inward rectifier potassium channel Irk
gene282	FE46_RS01385	NZ_CP007627.1	complement(326927..327541)	141	7.59091	9.22171	9.61051	deoxynucleoside kinase
gene202	FE46_RS01000	NZ_CP007627.1	complement(240263..242377)	423	6.62185	8.04447	9.61051	DUF4301 family protein
gene2149	FE46_RS10640	NZ_CP007627.1	complement(2414011..2414916)	216	7.8936	9.58943	9.58943	T9SS type A sorting domain-containing
gene2040	FE46_RS10095	NZ_CP007627.1	2290521..2291225	468	21.9789	26.7008	9.56961	sulfite exporter family
gene1764	FE46_RS08725	NZ_CP007627.1	complement(1993742..1994677)	558	19.7382	23.9787	9.50827	malate dehydrogenase
gene302	FE46_RS01485	NZ_CP007627.1	complement(349567..352311)	1805	21.7713	26.4486	9.4637	T9SS type A sorting domain-containing protein
gene1406	FE46_RS06955	NZ_CP007627.1	1604885..1606276	327	7.77782	9.44878	9.44878	radical SAM
gene1799	FE46_RS08900	NZ_CP007627.1	2034856..2036109	366	9.66347	11.7395	9.35491	tyrosine-type recombinase integrase
gene2009	FE46_RS09945	NZ_CP007627.1	complement(2255337..2256104)	1003	43.2404	52.53	9.32238	Chromosome partitioning
gene2223	FE46_RS11010	NZ_CP007627.1	2480327..2483536	1226	12.6455	15.3622	9.28485	family -linked outer membrane
gene2312	FE46_RS11450	NZ_CP007627.1	complement(2583122..2584360)	226	6.0393	7.33676	9.24244	NADH-quinone oxidoreductase subunit D
gene2492	FE46_RS12340	NZ_CP007627.1	complement(2782382..2785846)	21150	202.096	245.513	9.24087	copper transporter
gene2486	FE46_RS12310	NZ_CP007627.1	2776574..2777434	677	26.0337	31.6266	9.22881	MBL fold metallo-hydrolase
gene1554	FE46_RS07680	NZ_CP007627.1	1767945..1768709	361	15.6241	18.9807	9.22711	class I SAM-dependent methyltransferase
gene2251	FE46_RS11150	NZ_CP007627.1	2512666..2513043	45	3.94158	4.78837	9.20155	group III truncated hemoglobin
gene2156	FE46_RS10675	NZ_CP007627.1	complement(2423446..2424585)	405	11.7625	14.2895	9.20155	pyridoxal phosphate-dependent aminotransferase
gene2517	FE46_RS12465	NZ_CP007627.1	complement(2820076..2821677)	809	16.72	20.312	9.19019	lipo
gene2535	FE46_RS12555	NZ_CP007627.1	complement(2839384..2840328)	404	14.1547	17.1956	9.17883	alpha beta hydrolase
gene1854	FE46_RS09170	NZ_CP007627.1	2091448..2092200	268	11.7839	14.3155	9.13339	tRNA pseudouridine(38-40) synthase
gene1600	FE46_RS07910	NZ_CP007627.1	complement(1826216..1827061)	1379	53.9689	65.5634	9.09601	transketolase
gene1624	FE46_RS08030	NZ_CP007627.1	1850017..1850445	265	20.4521	24.846	9.03115	family thioesterase
gene2512	FE46_RS12440	NZ_CP007627.1	2814972..2816228	132	3.47687	4.22383	8.99707	rod shape-determining
gene1644	FE46_RS08130	NZ_CP007627.1	1871011..1872081	308	9.52162	11.5672	8.99707	Phosphoserine aminotransferase
gene2111	FE46_RS10450	NZ_CP007627.1	complement(2373793..2375988)	2355	35.5065	43.1346	8.91755	DNA helicase
gene610	FE46_RS03015	NZ_CP007627.1	713953..714459	1430	93.3851	113.448	8.86075	Hypothetical transmembrane
gene1175	FE46_RS05825	NZ_CP007627.1	1343422..1344471	130	4.09924	4.97991	8.86075	O-succinylbenzoic acid-- ligase
gene605	FE46_RS02990	NZ_CP007627.1	706489..706995	1470	95.9973	116.621	8.8407	Hypothetical transmembrane
gene59	FE46_RS00300	NZ_CP007627.1	79224..80180	861	29.788	36.1875	8.80282	Putative carboxypeptidase
gene406	FE46_RS02010	NZ_CP007627.1	complement(479467..480075)	129	7.01329	8.52	8.79259	hypothetical protein
gene2562	FE46_RS12685	NZ_CP007627.1	complement(2868511..2869554)	256	8.11875	9.86295	8.72443	heptosyltransferase
gene2551	FE46_RS12630	NZ_CP007627.1	complement(2857604..2859181)	16159	339.045	411.884	8.71814	F0F1 ATP synthase subunit alpha
gene862	FE46_RS04275	NZ_CP007627.1	1001367..1002299	1873	66.467	80.7465	8.70429	peptidylprolyl isomerase
gene994	FE46_RS04920	NZ_CP007627.1	complement(1135695..1136930)	297	7.95587	9.66508	8.67575	imidazolonepropionase
gene526	FE46_RS02600	NZ_CP007627.1	613396..614487	212	6.42781	7.80873	8.6699	Hypothetical transmembrane
gene1431	FE46_RS07075	NZ_CP007627.1	1626979..1627353	211	18.6295	22.6318	8.62901	DUF4258 domain-containing
gene1744	FE46_RS08625	NZ_CP007627.1	complement(1972495..1973031)	464	28.6084	34.7545	8.62529	sigma-70 family RNA polymerase sigma factor
gene306	FE46_RS01500	NZ_CP007627.1	complement(355290..356681)	253	6.01771	7.31053	8.62219	T9SS type A sorting domain-containing protein
gene417	FE46_RS02060	NZ_CP007627.1	490811..491338	252	15.8022	19.197	8.58811	Hypothetical transmembrane
gene1072	FE46_RS05310	NZ_CP007627.1	complement(1233099..1233656)	84	4.98419	6.05498	8.58811	family
gene1652	FE46_RS08170	NZ_CP007627.1	1876690..1877352	335	16.7294	20.3235	8.56255	ABC transporter ATP-binding
gene1074	FE46_RS05320	NZ_CP007627.1	complement(1235383..1236417)	251	8.0294	9.7544	8.55403	arginase
gene845	FE46_RS04190	NZ_CP007627.1	979939..980520	3879	220.672	268.08	8.52875	chalcone isomerase
gene960	FE46_RS04750	NZ_CP007627.1	1103038..1103397	458	42.1224	51.1718	8.51376	sulfurtransferase
gene630	FE46_RS03120	NZ_CP007627.1	complement(743727..744995)	1373	35.8227	43.5187	8.50756	DNA cytosine methyltransferase
gene2209	FE46_RS10940	NZ_CP007627.1	complement(2470141..2470332)	827	142.611	173.249	8.4552	50S ribosomal L29
gene608	FE46_RS03005	NZ_CP007627.1	711370..711876	1446	94.43	114.717	8.4479	Hypothetical transmembrane
gene1781	FE46_RS08810	NZ_CP007627.1	2015913..2016905	991	33.0426	40.1413	8.44327	Anthranilate phosphoribosyltransferase
gene1026	FE46_RS05080	NZ_CP007627.1	complement(1179841..1181073)	619	16.6218	20.1927	8.43816	MFS transporter
gene345	FE46_RS01705	NZ_CP007627.1	409022..410956	781	13.3635	16.2344	8.40516	family
gene1160	FE46_RS05750	NZ_CP007627.1	complement(1320619..1321641)	213	6.89372	8.37474	8.37474	tRNA N6-adenosine threonylcarbamoyltransferase
gene729	FE46_RS03610	NZ_CP007627.1	complement(855084..855713)	1428	75.0477	91.1706	8.34274	flavin oxidoreductase
gene1774	FE46_RS08775	NZ_CP007627.1	complement(2009664..2011193)	571	12.3565	15.0111	8.33982	monooxygenase
gene1553	FE46_RS07675	NZ_CP007627.1	complement(1766644..1767816)	691	19.5043	23.6945	8.31146	RNA methyltransferase
gene2107	FE46_RS10430	NZ_CP007627.1	complement(2370692..2372254)	325	6.88453	8.36357	8.30695	FAD-binding
gene446	FE46_RS02200	NZ_CP007627.1	525007..527160	203	3.12033	3.79068	8.30184	peptidase domain-containing ABC transporter
gene1015	FE46_RS12970	NZ_CP007627.1	complement(1169168..1169821)	241	12.2008	14.822	8.21323	hypothetical protein
gene527	FE46_RS02605	NZ_CP007627.1	complement(614600..616183)	522	10.911	13.2551	8.21061	IS1182 family transposase
gene2558	FE46_RS12665	NZ_CP007627.1	complement(2863781..2864008)	40	5.80864	7.05655	8.17915	family
gene861	FE46_RS04270	NZ_CP007627.1	1000450..1001091	399	20.5773	24.998	8.15871	N/A
gene2193	FE46_RS10860	NZ_CP007627.1	complement(2463225..2463608)	598	51.5608	62.6379	8.15189	30S ribosomal S11
gene1664	FE46_RS08230	NZ_CP007627.1	1887665..1888123	398	28.7091	34.8769	8.13826	sensor of ECF-type sigma factor
gene1001	FE46_RS04955	NZ_CP007627.1	complement(1146229..1147383)	277	7.94049	9.6464	8.09152	Na+ H+ antiporter
gene981	FE46_RS04855	NZ_CP007627.1	1124457..1126247	24677	456.191	554.197	8.06058	30S ribosomal S1
gene2468	FE46_RS12220	NZ_CP007627.1	complement(2760412..2760891)	197	13.5886	16.5079	8.05647	acetyl- carboxylase biotin carboxyl carrier
gene20	FE46_RS00105	NZ_CP007627.1	complement(38718..39536)	157	6.34695	7.71051	8.0258	OmpA family protein
gene401	FE46_RS01985	NZ_CP007627.1	473660..474205	1762	106.847	129.802	8.00648	cytochrome c
gene1705	FE46_RS08435	NZ_CP007627.1	1935028..1935597	274	15.9157	19.3349	8.00389	cob(I)yrinic acid a,c-diamide adenosyltransferase
gene745	FE46_RS03690	NZ_CP007627.1	866876..867370	273	18.2603	22.1832	7.97468	GNAT family N-acetyltransferase
gene1240	FE46_RS06145	NZ_CP007627.1	1410051..1410851	78	3.22412	3.91678	7.97468	hypothetical protein
gene336	FE46_RS01655	NZ_CP007627.1	393930..394151	44	6.5622	7.97199	7.97199	type II toxin-antitoxin system RelE/ParE family toxin
gene1057	FE46_RS05235	NZ_CP007627.1	complement(1214053..1214790)	467	20.9513	25.4523	7.95764	alpha beta hydrolase
gene178	FE46_RS00880	NZ_CP007627.1	complement(214424..215149)	350	15.9618	19.3909	7.95196	polyprenol monophosphomannose synthase
gene1721	FE46_RS08515	NZ_CP007627.1	complement(1952566..1954038)	291	6.54094	7.94616	7.94616	hypothetical protein FPSM_01767
gene2145	FE46_RS10620	NZ_CP007627.1	complement(2409973..2410602)	155	8.14593	9.89597	7.92356	acetyltransferase
gene2073	FE46_RS10260	NZ_CP007627.1	complement(2331797..2332279)	95	6.51218	7.91123	7.91123	3 -5 exonuclease
gene1482	FE46_RS07320	NZ_CP007627.1	complement(1688362..1689849)	1270	28.2586	34.3295	7.86934	aminotransferase class V-fold PLP-dependent enzyme
gene2501	FE46_RS12385	NZ_CP007627.1	2795499..2796710	306	8.35927	10.1551	7.82132	tetracycline resistance MFS efflux pump
gene1054	FE46_RS05220	NZ_CP007627.1	complement(1211260..1213032)	918	17.1429	20.8258	7.82132	long-chain fatty acid-- ligase
gene2075	FE46_RS10270	NZ_CP007627.1	complement(2334515..2336437)	535	9.21137	11.1903	7.81401	porin [Flavobacterium psychrophilum DSM 3660]
gene2263	FE46_RS11210	NZ_CP007627.1	complement(2524689..2525687)	917	30.3916	36.9208	7.8128	pyruvate dehydrogenase (acetyl-transferring) E1 component subunit alpha
gene1306	FE46_RS06455	NZ_CP007627.1	complement(1489201..1489767)	191	11.1532	13.5493	7.81109	DNA polymerase III subunit epsilon
gene1766	FE46_RS08735	NZ_CP007627.1	complement(1997141..1998757)	229	4.68894	5.6963	7.80428	asparagine synthase B
gene63	FE46_RS00320	NZ_CP007627.1	complement(82848..83609)	495	21.508	26.1287	7.78593	Exodeoxyribonuclease III
gene2048	FE46_RS10135	NZ_CP007627.1	complement(2301600..2303534)	722	12.354	15.008	7.7702	family
gene2036	FE46_RS10075	NZ_CP007627.1	2287403..2287594	37	6.38043	7.75118	7.75118	family Cbb3-type cytochrome c oxidase assembly chaperone
gene1000	FE46_RS04950	NZ_CP007627.1	complement(1144984..1146171)	1247	34.7536	42.2199	7.72682	tRNA 2-thiouridine(34) synthase
gene2204	FE46_RS10915	NZ_CP007627.1	complement(2468338..2468607)	1623	199.024	241.781	7.71789	30S ribosomal S14
gene1810	FE46_RS13075	NZ_CP007627.1	2044071..2045375	264	6.69797	8.13693	7.71177	hypothetical protein
gene2174	FE46_RS10765	NZ_CP007627.1	complement(2440782..2442158)	264	6.34775	7.71147	7.71147	UDP-glucose 6-dehydrogenase
gene1603	FE46_RS07925	NZ_CP007627.1	1829838..1831121	4552	117.378	142.595	7.69246	fumarylacetoacetase
gene2070	FE46_RS10245	NZ_CP007627.1	complement(2329065..2329940)	564	21.3169	25.8966	7.68841	helix-hairpin-helix domain-containing
gene740	FE46_RS03665	NZ_CP007627.1	863074..863709	1988	103.493	125.726	7.66989	carbonate dehydratase
gene575	FE46_RS02845	NZ_CP007627.1	677513..677986	90	6.28657	7.63715	7.63715	hypothetical protein
gene171	FE46_RS00845	NZ_CP007627.1	complement(204253..205449)	261	7.21932	8.77028	7.62414	glycine C-acetyltransferase
gene1305	FE46_RS06450	NZ_CP007627.1	1487156..1489063	1116	19.3658	23.5263	7.60661	acetate-- ligase
gene1817	FE46_RS08995	NZ_CP007627.1	complement(2051004..2051933)	555	19.7588	24.0037	7.56572	1,4-dihydroxy-2-naphthoate octaprenyltransferase
gene591	FE46_RS02925	NZ_CP007627.1	complement(692192..692530)	74	7.22739	8.7801	7.56572	hypothetical protein
gene201	FE46_RS00995	NZ_CP007627.1	complement(239859..240263)	37	3.0248	3.67463	7.56572	aminoacyl-tRNA hydrolase
gene1713	FE46_RS08475	NZ_CP007627.1	1943419..1943808	37	3.14114	3.81597	7.56572	hypothetical protein
gene1363	FE46_RS06740	NZ_CP007627.1	1552174..1553802	306	6.21942	7.55558	7.55558	methylcrotonoyl- carboxylase
gene1622	FE46_RS08020	NZ_CP007627.1	1846823..1848169	369	9.07002	11.0186	7.54527	DEAD DEAH box helicase
gene239	FE46_RS01185	NZ_CP007627.1	complement(276881..277858)	182	6.16144	7.48514	7.48514	succinylglutamate desuccinylase
gene209	FE46_RS01035	NZ_CP007627.1	complement(248063..251416)	621	6.13025	7.44725	7.46949	transcription-repair coupling factor
gene1692	FE46_RS08370	NZ_CP007627.1	1920507..1920935	73	5.63398	6.84436	7.46348	hypothetical protein
gene891	FE46_RS04410	NZ_CP007627.1	1035954..1037306	251	6.14222	7.46179	7.46179	SPASM domain-containing
gene2010	FE46_RS09950	NZ_CP007627.1	complement(2256517..2257380)	1204	46.1384	56.0506	7.46038	SDR family oxidoreductase
gene1645	FE46_RS08135	NZ_CP007627.1	1872134..1873093	254	8.76016	10.6422	7.41966	3-phosphoglycerate dehydrogenase
gene311	FE46_RS01530	NZ_CP007627.1	complement(363111..363701)	688	38.5435	46.824	7.40429	T9SS type A sorting domain-containing protein
gene1534	FE46_RS07580	NZ_CP007627.1	complement(1746965..1749580)	938	11.8718	14.4222	7.37697	DNA gyrase subunit A
gene1178	FE46_RS05840	NZ_CP007627.1	complement(1346158..1346772)	1256	67.6183	82.1451	7.33787	class I SAM-dependent methyltransferase
gene2451	FE46_RS12135	NZ_CP007627.1	2740108..2741109	182	6.01386	7.30585	7.30585	phosphatase PAP2 family
gene67	FE46_RS00340	NZ_CP007627.1	complement(87791..88567)	106	4.51684	5.48722	7.22492	pyrroline-5-carboxylate reductase
gene1034	FE46_RS05120	NZ_CP007627.1	1186530..1187195	459	22.8186	27.7208	7.21968	tRNA (5-methylaminomethyl-2-thiouridine)(34)-methyltransferase
gene919	FE46_RS04550	NZ_CP007627.1	complement(1065580..1066272)	1516	72.4295	87.99	7.20907	response regulator transcription factor
gene1275	FE46_RS13220	NZ_CP007627.1	complement(1454232..1454575)	70	6.73735	8.18478	7.15676	hypothetical protein
gene349	FE46_RS01725	NZ_CP007627.1	415594..416322	105	4.76883	5.79334	7.15676	RNA methyltransferase
gene1344	FE46_RS06645	NZ_CP007627.1	complement(1528533..1529957)	349	8.10887	9.85094	7.13631	AAA family ATPase
gene711	FE46_RS03525	NZ_CP007627.1	835240..836343	195	5.84811	7.10449	7.10449	UDP-N-acetylglucosamine--N-acetylmuramyl-(pentapeptide) pyrophosphoryl-undecaprenol N-acetylglucosamine transferase
gene1594	FE46_RS13055	NZ_CP007627.1	complement(1814043..1820975)	937	4.47474	5.43608	7.09617	T9SS type B sorting domain-containing
gene1352	FE46_RS06685	NZ_CP007627.1	1540128..1541486	312	7.60125	9.23427	7.0886	HAMP domain-containing histidine kinase
gene1936	FE46_RS09580	NZ_CP007627.1	complement(2171789..2172796)	658	21.613	26.2562	7.08143	ketoacyl-ACP synthase III
gene1253	FE46_RS06210	NZ_CP007627.1	complement(1427566..1428462)	242	8.93249	10.8515	7.06913	type II CRISPR-associated endonuclease Cas1
gene40	FE46_RS00205	NZ_CP007627.1	complement(60630..61655)	179	5.77637	7.01735	7.01735	uroporphyrinogen decarboxylase
gene142	FE46_RS00700	NZ_CP007627.1	complement(171174..171359)	274	48.7739	59.2523	7.0034	N/A
gene1623	FE46_RS08025	NZ_CP007627.1	complement(1848222..1849763)	683	14.6651	17.8157	6.98295	hypothetical protein
gene685	FE46_RS03395	NZ_CP007627.1	809013..809381	682	61.1938	74.3405	6.97273	Sec-independent translocase
gene62	FE46_RS00315	NZ_CP007627.1	complement(81815..82777)	1737	59.7205	72.5506	6.96431	cell envelope biogenesis protein OmpA
gene1969	FE46_RS13080	NZ_CP007627.1	2207762..2208433	68	3.35034	4.07012	6.95228	class I SAM-dependent methyltransferase
gene1648	FE46_RS08150	NZ_CP007627.1	1874573..1874878	34	3.67881	4.46915	6.95228	diacylglyceryl transferase
gene1041	FE46_RS05155	NZ_CP007627.1	1192983..1194185	1052	28.9534	35.1736	6.93909	cystathionine beta-lyase
gene1770	FE46_RS08755	NZ_CP007627.1	2001444..2003651	438	6.56787	7.97889	6.88936	N/A
gene2556	FE46_RS12655	NZ_CP007627.1	2862013..2863383	202	4.87824	5.92627	6.88412	T9SS type A sorting domain-containing
gene324	FE46_RS01595	NZ_CP007627.1	complement(379131..380138)	874	28.7078	34.8753	6.87364	class 1 fructose-bisphosphatase
gene2583	FE46_RS12790	NZ_CP007627.1	complement(2888482..2888910)	168	12.9659	15.7514	6.87049	ribose 5-phosphate isomerase B
gene238	FE46_RS01180	NZ_CP007627.1	complement(276273..276836)	168	9.86234	11.9811	6.87049	5-formyltetrahydrofolate cyclo-ligase
gene427	FE46_RS02110	NZ_CP007627.1	complement(506088..506882)	334	13.9101	16.8984	6.82959	DUF2797 domain-containing
gene1635	FE46_RS08085	NZ_CP007627.1	complement(1858393..1861113)	866	10.5375	12.8014	6.81072	DNA gyrase topoisomerase IV subunit A
gene242	FE46_RS01200	NZ_CP007627.1	282164..283642	1597	35.7509	43.4314	6.80318	Amino acid permease
gene2259	FE46_RS11190	NZ_CP007627.1	complement(2520365..2521426)	179	5.58056	6.77947	6.77947	mannose-1-phosphate guanylyltransferase
gene1073	FE46_RS05315	NZ_CP007627.1	complement(1234030..1235274)	1319	35.0772	42.6131	6.74269	DEAD DEAH box helicase
gene1124	FE46_RS05570	NZ_CP007627.1	1284282..1284902	2694	143.633	174.491	6.71788	hypothetical protein
gene832	FE46_RS04125	NZ_CP007627.1	967758..967997	40	5.51821	6.70372	6.70372	hypothetical protein
gene48	FE46_RS00245	NZ_CP007627.1	68807..69589	228	9.64101	11.7123	6.66017	enoyl-CoA hydratase
gene1639	FE46_RS08105	NZ_CP007627.1	1863928..1866456	748	9.7927	11.8965	6.65001	N/A
gene2367	FE46_RS11725	NZ_CP007627.1	complement(2651453..2652688)	130	3.48237	4.2305	6.64556	beta-ketoacyl-[acyl-carrier- ] synthase family
gene56	FE46_RS00285	NZ_CP007627.1	complement(75558..77618)	1104	17.7354	21.5456	6.63955	methionine--tRNA ligase
gene2571	FE46_RS12730	NZ_CP007627.1	complement(2877218..2878201)	519	17.4631	21.2148	6.63278	NAD-dependent dehydratase
gene2144	FE46_RS10615	NZ_CP007627.1	complement(2408855..2409973)	184	5.44424	6.61386	6.61386	dTDP-4-amino-4,6-dideoxygalactose transaminase
gene2148	FE46_RS10635	NZ_CP007627.1	complement(2412577..2413434)	97	3.74312	4.54728	6.61148	ABC transporter permease
gene423	FE46_RS02090	NZ_CP007627.1	499487..500035	129	7.77977	9.45115	6.59444	RNA methyltransferase
gene2480	FE46_RS12280	NZ_CP007627.1	complement(2769192..2770406)	1160	31.6105	38.4016	6.58876	Cysteine desulfurase
gene1848	FE46_RS09140	NZ_CP007627.1	complement(2084470..2085063)	1642	91.5243	111.187	6.58342	glutathione peroxidase
gene826	FE46_RS04095	NZ_CP007627.1	complement(958212..958649)	418	31.5974	38.3857	6.57478	TPM domain-containing
gene1092	FE46_RS05410	NZ_CP007627.1	1256013..1256570	450	26.701	32.4374	6.57253	family
gene2507	FE46_RS12415	NZ_CP007627.1	2809082..2810614	482	10.4101	12.6466	6.57059	bifunctional phosphoribosylaminoimidazolecarboxamide formyltransferase IMP cyclohydrolase
gene1830	FE46_RS09055	NZ_CP007627.1	complement(2063791..2065269)	224	5.01452	6.09182	6.54332	proline--tRNA ligase
gene1079	FE46_RS05345	NZ_CP007627.1	1241235..1242425	2779	77.255	93.8521	6.53157	aspartate aminotransferase
gene1609	FE46_RS07955	NZ_CP007627.1	complement(1835985..1836449)	1562	111.219	135.112	6.51829	DUF4870 domain-containing
gene0	FE46_RS00005	NZ_CP007627.1	1..3333	636	6.31788	7.67519	6.50243	Putative chromosome segregation ATPase
gene2197	FE46_RS10880	NZ_CP007627.1	complement(2464331..2465674)	6714	165.399	200.932	6.47581	pre translocase subunit
gene322	FE46_RS01585	NZ_CP007627.1	complement(375625..378855)	917	9.39684	11.4156	6.46576	DUF2723 domain-containing protein
gene2202	FE46_RS10905	NZ_CP007627.1	complement(2467240..2467785)	4454	270.089	328.114	6.45921	50S ribosomal L6
gene2254	FE46_RS11165	NZ_CP007627.1	complement(2515755..2516633)	141	5.31104	6.45205	6.45205	Glycosyl group 2 family
gene1928	FE46_RS09540	NZ_CP007627.1	complement(2157079..2157555)	157	10.8976	13.2388	6.42064	family membrane
gene645	FE46_RS03195	NZ_CP007627.1	762826..763407	94	5.34755	6.49639	6.407	Holliday junction branch migration
gene764	FE46_RS03785	NZ_CP007627.1	complement(887308..887700)	62	5.22335	6.34551	6.33884	SRPBCC domain-containing
gene337	FE46_RS01660	NZ_CP007627.1	394244..395182	1798	63.3977	77.0179	6.33884	mevalonate kinase
gene86	FE46_RS00435	NZ_CP007627.1	108748..109569	93	3.74594	4.5507	6.33884	epimerase
gene2101	FE46_RS10400	NZ_CP007627.1	2365861..2366541	62	3.01435	3.66195	6.33884	ion transporter
gene335	FE46_RS13140	NZ_CP007627.1	393711..393930	62	9.3308	11.3354	6.33884	hypothetical protein
gene329	FE46_RS01620	NZ_CP007627.1	386700..387299	155	8.55323	10.3908	6.33884	colicin import membrane protein
gene350	FE46_RS01730	NZ_CP007627.1	complement(416319..417029)	433	20.1636	24.4955	6.32424	family
gene1314	FE46_RS06495	NZ_CP007627.1	complement(1497538..1497954)	954	75.7464	92.0194	6.29267	NUDIX hydrolase
gene644	FE46_RS03190	NZ_CP007627.1	760437..762752	523	7.47675	9.08302	6.29073	NADP-dependent malic enzyme
gene517	FE46_RS02555	NZ_CP007627.1	605199..605441	38	5.17758	6.28991	6.28991	Modification methylase
gene751	FE46_RS03720	NZ_CP007627.1	873399..873812	123	9.83681	11.9501	6.28773	3-dehydroquinate dehydratase
gene1885	FE46_RS09325	NZ_CP007627.1	complement(2114850..2115299)	2397	176.362	214.251	6.28379	hypothetical protein
gene1776	FE46_RS08785	NZ_CP007627.1	2011812..2012264	3525	257.638	312.988	6.26772	family transcriptional regulator
gene1691	FE46_RS08365	NZ_CP007627.1	complement(1919662..1920333)	397	19.5601	23.7623	6.24447	GTP cyclohydrolase I
gene2231	FE46_RS11050	NZ_CP007627.1	complement(2490910..2492268)	122	2.97228	3.61084	6.23661	peptidoglycan synthetase
gene1090	FE46_RS05400	NZ_CP007627.1	complement(1254493..1255470)	183	6.19529	7.52627	6.23661	family
gene46	FE46_RS00235	NZ_CP007627.1	66785..67327	84	5.12188	6.22224	6.22224	CopD family protein
gene1506	FE46_RS07440	NZ_CP007627.1	1717526..1718608	790	24.1517	29.3404	6.21301	glycine cleavage system aminomethyltransferase
gene2479	FE46_RS12275	NZ_CP007627.1	complement(2768520..2769035)	303	19.4421	23.6189	6.19571	lipo
gene2056	FE46_RS10175	NZ_CP007627.1	complement(2321715..2322215)	4301	284.237	345.302	6.19341	50S ribosomal L10
gene272	FE46_RS01335	NZ_CP007627.1	315971..316867	121	4.46625	5.42576	6.18549	gliding motility-associated ABC transporter ATP-binding subunit GldA
gene2	FE46_RS00015	NZ_CP007627.1	3959..5830	1775	31.3937	38.1382	6.15169	tRNA uridine-5-carboxymethylaminomethyl(34) synthesis enzyme MnmG
gene755	FE46_RS03740	NZ_CP007627.1	complement(879003..880310)	1412	35.7418	43.4204	6.14307	UDP-N-acetylglucosamine 1-carboxyvinyltransferase
gene165	FE46_RS00815	NZ_CP007627.1	194973..195524	240	14.3953	17.488	6.13437	methyltransferase
ssrS	ssrS	NZ_CP007627.1	2273566..2273672	808	250.021	303.735	6.11922	N/A
gene1979	FE46_RS09795	NZ_CP007627.1	complement(2218973..2219737)	179	7.74714	9.4115	6.10029	MBL fold metallo-hydrolase
gene12	FE46_RS00065	NZ_CP007627.1	18166..19458	27269	698.265	848.278	6.09392	Gliding motility protein RemG
gene1637	FE46_RS08095	NZ_CP007627.1	complement(1861432..1861842)	62	4.99459	6.0676	6.0676	Nucleotidyltransferase
gene1907	FE46_RS09435	NZ_CP007627.1	complement(2136483..2137832)	415	10.178	12.3646	6.06134	signal recognition particle
gene2198	FE46_RS10885	NZ_CP007627.1	complement(2465686..2466139)	2333	170.141	206.693	6.0386	50S ribosomal L15
gene1653	FE46_RS08175	NZ_CP007627.1	1877483..1878256	59	2.52383	3.06604	6.03213	TIGR02757 family
gene2179	FE46_RS10790	NZ_CP007627.1	complement(2447776..2448396)	88	4.69181	5.69978	5.99805	recombination
gene343	FE46_RS12935	NZ_CP007627.1	399067..408045	3222	11.8808	14.4333	5.98937	gene=FE46_RS12935 CDS=1-8979
gene2373	FE46_RS11755	NZ_CP007627.1	2658627..2659760	146	4.26275	5.17854	5.97078	glycerol acyltransferase
gene593	FE46_RS13155	NZ_CP007627.1	694461..694781	116	11.9647	14.5352	5.92989	Modification methylase
gene334	FE46_RS01650	NZ_CP007627.1	392598..393680	203	6.20608	7.53937	5.92989	diphosphomevalonate decarboxylase
gene407	FE46_RS02015	NZ_CP007627.1	480543..482684	1215	18.7805	22.8152	5.91528	S46 family peptidase
gene1354	FE46_RS06695	NZ_CP007627.1	complement(1542295..1542873)	462	26.4188	32.0945	5.90433	family transcriptional regulator
gene382	FE46_RS01890	NZ_CP007627.1	complement(451713..454547)	1327	15.4977	18.8272	5.89877	N/A
gene1626	FE46_RS08040	NZ_CP007627.1	complement(1851586..1852035)	259	19.0562	23.1502	5.88445	hypothetical protein
gene1650	FE46_RS08160	NZ_CP007627.1	complement(1875267..1875938)	1293	63.7058	77.3921	5.87536	GTP cyclohydrolase I
gene2447	FE46_RS12115	NZ_CP007627.1	complement(2737294..2737998)	86	4.03886	4.90655	5.86173	tRNA pseudouridine(55) synthase
gene144	FE46_RS00710	NZ_CP007627.1	complement(172303..173307)	2118	69.7766	84.7671	5.85252	MoxR family ATPase
gene2161	FE46_RS10700	NZ_CP007627.1	complement(2427276..2428280)	146	4.8099	5.84325	5.84325	ketoacyl-ACP synthase III
gene2506	FE46_RS12410	NZ_CP007627.1	complement(2807669..2808925)	514	13.5387	16.4473	5.83901	ABC transporter permease
gene109	FE46_RS00550	NZ_CP007627.1	complement(137348..138709)	171	4.15689	5.04994	5.82765	DNA repair protein RadA
gene849	FE46_RS04210	NZ_CP007627.1	complement(983944..986199)	2047	30.042	36.4961	5.81345	N/A
gene2348	FE46_RS11630	NZ_CP007627.1	complement(2635579..2636784)	142	3.89844	4.73596	5.8072	beta-ketoacyl-[acyl-carrier- ] synthase family
gene1466	FE46_RS07240	NZ_CP007627.1	complement(1666488..1668176)	368	7.21386	8.76366	5.78832	single-stranded-DNA-specific exonuclease
gene1473	FE46_RS07275	NZ_CP007627.1	complement(1675501..1676121)	113	6.02471	7.31904	5.77653	threonylcarbamoyl-AMP synthase
gene87	FE46_RS00440	NZ_CP007627.1	complement(109624..111684)	295	4.73908	5.7572	5.7572	endothelin-converting protein
gene1050	FE46_RS05200	NZ_CP007627.1	complement(1205764..1206144)	28	2.43323	2.95597	5.72541	four helix bundle
gene1772	FE46_RS08765	NZ_CP007627.1	complement(2005561..2008572)	980	10.7726	13.0869	5.72541	tetratricopeptide repeat
gene450	FE46_RS02220	NZ_CP007627.1	complement(529889..530707)	224	9.05553	11.001	5.72541	type I methionyl aminopeptidase
gene1284	FE46_RS06345	NZ_CP007627.1	complement(1459646..1461814)	419	6.39594	7.77001	5.71178	cytochrome oxidase subunit I
gene435	FE46_RS02150	NZ_CP007627.1	complement(514520..514843)	46	4.7007	5.71058	5.71058	glutaminyl-tRNA synthetase
gene2167	FE46_RS10730	NZ_CP007627.1	complement(2432786..2433829)	148	4.69365	5.70202	5.70202	UDP-glucose 4-epimerase
gene2461	FE46_RS12185	NZ_CP007627.1	complement(2753276..2754028)	194	8.53014	10.3627	5.66699	UDP-2,3-diacylglucosamine diphosphatase
gene149	FE46_RS00735	NZ_CP007627.1	complement(176678..177673)	637	21.1753	25.7245	5.66318	NAD(P)H-dependent glycerol-3-phosphate dehydrogenase
gene2087	FE46_RS10330	NZ_CP007627.1	2351733..2352173	83	6.23145	7.57019	5.65725	low molecular weight phosphotyrosine phosphatase
gene1972	FE46_RS09760	NZ_CP007627.1	2210944..2212062	912	26.9845	32.7817	5.65105	DNA polymerase III subunit beta
gene129	FE46_RS00645	NZ_CP007627.1	complement(159914..160270)	50	4.63715	5.63338	5.63338	hypothetical protein
gene2347	FE46_RS11625	NZ_CP007627.1	complement(2634518..2635582)	149	4.63219	5.62735	5.62735	3-oxoacyl-ACP synthase
gene2162	FE46_RS10705	NZ_CP007627.1	complement(2428282..2428884)	55	3.01992	3.6687	5.62317	sugar transferase
gene1181	FE46_RS05855	NZ_CP007627.1	1348146..1348643	110	7.31329	8.88445	5.62317	thiol peroxidase
gene836	FE46_RS04145	NZ_CP007627.1	970242..970880	55	2.84978	3.46202	5.62317	pyrophosphatase
gene646	FE46_RS03200	NZ_CP007627.1	763411..770649	467	2.13593	2.59481	5.61715	cell surface
gene747	FE46_RS03700	NZ_CP007627.1	complement(868267..869508)	383	10.21	12.4035	5.59396	ABC transporter permease
gene2561	FE46_RS12680	NZ_CP007627.1	2867149..2868201	710	22.3244	27.1205	5.58385	ferredoxin--NADP reductase
gene1489	FE46_RS07355	NZ_CP007627.1	1696153..1696746	82	4.57064	5.55258	5.55258	DUF479 domain-containing
gene727	FE46_RS13180	NZ_CP007627.1	complement(853461..853598)	19	4.55852	5.53786	5.53786	DUF2256 domain-containing
gene2518	FE46_RS12470	NZ_CP007627.1	complement(2821765..2822448)	94	4.5501	5.52763	5.52763	amidophosphoribosyltransferase
gene2051	FE46_RS10150	NZ_CP007627.1	2310089..2311678	753	15.6801	19.0487	5.49902	peptide chain release factor 3
gene2189	FE46_RS10840	NZ_CP007627.1	complement(2459550..2460656)	215	6.43044	7.81193	5.49537	Carbamoyl-phosphate synthase small chain
gene10	FE46_RS00055	NZ_CP007627.1	complement(16117..17265)	215	6.19538	7.52637	5.49537	DNA polymerase III subunit delta'
gene1500	FE46_RS07410	NZ_CP007627.1	complement(1712125..1712703)	79	4.5175	5.48802	5.48802	acyltransferase
gene1474	FE46_RS07280	NZ_CP007627.1	complement(1676173..1678506)	295	4.18476	5.0838	5.48375	ATP-dependent DNA helicase
gene2475	FE46_RS12255	NZ_CP007627.1	complement(2766149..2767045)	1522	56.1787	68.2479	5.45994	DUF3078 domain-containing
gene2549	FE46_RS12620	NZ_CP007627.1	complement(2853865..2856189)	613	8.72946	10.6049	5.44981	N/A
gene2267	FE46_RS11230	NZ_CP007627.1	2531658..2533388	13952	266.863	324.195	5.44444	gliding motility lipo
gene1182	FE46_RS05860	NZ_CP007627.1	1348646..1349026	133	11.5578	14.0409	5.43914	diacylglycerol kinase family
gene2191	FE46_RS10850	NZ_CP007627.1	complement(2461511..2462503)	3932	131.103	159.269	5.43251	DNA-directed RNA polymerase subunit alpha
gene1816	FE46_RS08990	NZ_CP007627.1	2049608..2050981	106	2.55428	3.10303	5.41869	M28 family peptidase
gene2192	FE46_RS10855	NZ_CP007627.1	complement(2462528..2463133)	4057	221.657	269.277	5.38682	30S ribosomal S4
gene2232	FE46_RS11055	NZ_CP007627.1	complement(2492300..2492992)	79	3.77436	4.58523	5.38461	tetratricopeptide repeat
gene32	FE46_RS00165	NZ_CP007627.1	complement(54356..54826)	63	4.42863	5.38006	5.38006	methylated-DNA--[protein]-cysteine S-methyltransferase
gene597	FE46_RS02950	NZ_CP007627.1	complement(698643..699650)	131	4.30289	5.22731	5.35735	DNA cytosine methyltransferase
gene312	FE46_RS01535	NZ_CP007627.1	complement(363806..364411)	288	15.7351	19.1156	5.35363	Probable lipoprotein precursor
gene896	FE46_RS04435	NZ_CP007627.1	1041721..1042074	47	4.39586	5.34025	5.34025	DUF1569 domain-containing
gene2086	FE46_RS10325	NZ_CP007627.1	2350275..2351711	938	21.612	26.2551	5.32781	Chromosomal replication initiator
gene1422	FE46_RS07030	NZ_CP007627.1	complement(1617847..1618194)	26	2.47368	3.00512	5.31645	type III effector
gene2537	FE46_RS12565	NZ_CP007627.1	complement(2842117..2842812)	52	2.47368	3.00512	5.31645	hypothetical protein
gene1740	FE46_RS08610	NZ_CP007627.1	complement(1968314..1969234)	156	5.60809	6.8129	5.31645	WYL domain-containing
gene1963	FE46_RS09715	NZ_CP007627.1	2203814..2204644	78	3.10773	3.77538	5.31645	SAM-dependent chlorinase fluorinase
gene1313	FE46_RS06490	NZ_CP007627.1	complement(1497155..1497541)	727	62.1975	75.5598	5.30915	acyl- thioesterase
gene1590	FE46_RS07860	NZ_CP007627.1	complement(1809258..1809401)	19	4.36858	5.30711	5.30711	N/A
gene1520	FE46_RS07510	NZ_CP007627.1	complement(1729797..1730948)	700	20.1185	24.4407	5.3013	N-acetyl-alpha-D-glucosaminyl L-malate synthase
gene258	FE46_RS01280	NZ_CP007627.1	complement(302091..303140)	1140	35.9472	43.67	5.29786	tRNA preQ1(34) S-adenosylmethionine ribosyltransferase-isomerase QueA
gene307	FE46_RS01505	NZ_CP007627.1	complement(356767..358110)	181	4.45891	5.41685	5.28724	deoxyguanosinetriphosphate triphosphohydrolase
gene695	FE46_RS03445	NZ_CP007627.1	817775..819049	1344	34.9011	42.3991	5.28499	hypothetical protein
gene963	FE46_RS04765	NZ_CP007627.1	1104351..1104560	539	84.9805	103.237	5.24829	N/A
gene1519	FE46_RS07505	NZ_CP007627.1	1728799..1729692	64	7.0807	8.60045	5.24209	family transcriptional regulator
gene1029	FE46_RS05095	NZ_CP007627.1	1182509..1183219	179	8.33553	10.1263	5.22882	tRNA threonylcarbamoyladenosine dehydratase
gene699	FE46_RS03465	NZ_CP007627.1	822897..823853	817	28.2657	34.3382	5.2206	gliding motility lipo
gene666	FE46_RS03300	NZ_CP007627.1	complement(789597..790493)	842	31.0792	37.7561	5.21731	family
gene1252	FE46_RS06205	NZ_CP007627.1	complement(1427226..1427573)	51	4.85222	5.89465	5.21421	CRISPR-associated endonuclease Cas2
gene2305	FE46_RS11415	NZ_CP007627.1	complement(2576593..2577105)	51	3.29157	3.99871	5.21421	NADH dehydrogenase
gene2163	FE46_RS10710	NZ_CP007627.1	complement(2428877..2430079)	76	2.09169	2.54106	5.18013	glycosyltransferase family 4
gene970	FE46_RS04800	NZ_CP007627.1	1112297..1113640	480	11.8247	14.3651	5.16578	adenylosuccinate lyase
gene355	FE46_RS12940	NZ_CP007627.1	complement(422048..422794)	353	15.646	19.0073	5.15579	GLPGLI family
gene1897	FE46_RS09385	NZ_CP007627.1	2126904..2127452	50	3.01542	3.66324	5.11197	sigma-70 family RNA polymerase sigma factor
gene2449	FE46_RS12125	NZ_CP007627.1	complement(2738837..2739076)	75	10.3466	12.5695	5.11197	DUF3098 domain-containing
gene2168	FE46_RS10735	NZ_CP007627.1	complement(2433831..2434631)	125	5.16687	6.27689	5.11197	glycosyltransferase family 2
gene1527	FE46_RS07545	NZ_CP007627.1	complement(1738137..1738619)	50	3.42746	4.1638	5.11197	phosphoheptose isomerase
gene2553	FE46_RS12640	NZ_CP007627.1	complement(2859732..2860232)	2837	187.487	227.766	5.08865	F0F1 ATP synthase subunit B
gene1341	FE46_RS06630	NZ_CP007627.1	complement(1525515..1526750)	199	5.3307	6.47593	5.08641	HD domain-containing
gene2496	FE46_RS12360	NZ_CP007627.1	2789207..2790181	123	4.17686	5.0742	5.0742	polyprenyl synthetase family
gene496	FE46_RS02450	NZ_CP007627.1	complement(583228..583656)	248	19.1401	23.2521	5.07108	dCMP deaminase family
gene292	FE46_RS01435	NZ_CP007627.1	complement(339906..341249)	3393	83.5861	101.543	5.06421	NADP-specific glutamate dehydrogenase
gene318	FE46_RS01565	NZ_CP007627.1	complement(371155..371784)	148	7.77805	9.44906	5.04381	polysaccharide deacetylase family protein
gene1536	FE46_RS07590	NZ_CP007627.1	1752513..1753886	394	9.49422	11.5339	5.03529	30S ribosomal S6--L-glutamate ligase
gene1099	FE46_RS05445	NZ_CP007627.1	complement(1259531..1260028)	49	3.25774	3.95762	5.00973	N-acetyltransferase
gene308	FE46_RS13135	NZ_CP007627.1	complement(358797..359504)	170	7.94997	9.65791	4.96592	hypothetical protein
gene1132	FE46_RS05610	NZ_CP007627.1	complement(1290230..1291651)	631	14.6919	17.8483	4.96254	HD domain-containing
gene2118	FE46_RS10485	NZ_CP007627.1	2381277..2382353	194	5.96397	7.24525	4.95861	family
gene217	FE46_RS01075	NZ_CP007627.1	257579..257815	291	40.6532	49.3869	4.95861	Acyl carrier protein
gene1045	FE46_RS05175	NZ_CP007627.1	1201113..1201751	9020	467.364	567.771	4.95806	peroxiredoxin
gene1404	FE46_RS06945	NZ_CP007627.1	complement(1602432..1604048)	1230	25.1852	30.5958	4.93155	ATP-binding cassette domain-containing
gene713	FE46_RS03535	NZ_CP007627.1	837733..838455	241	11.0364	13.4074	4.92794	cell division
gene1094	FE46_RS05420	NZ_CP007627.1	complement(1256985..1257650)	72	3.57938	4.34836	4.90749	lysoplasmalogenase
gene817	FE46_RS04045	NZ_CP007627.1	complement(945561..946181)	48	2.55917	3.10897	4.90749	DUF4230 domain-containing
gene655	FE46_RS03245	NZ_CP007627.1	complement(780822..781064)	48	6.5401	7.94515	4.90749	Hypothetical transmembrane
gene2542	FE46_RS12590	NZ_CP007627.1	complement(2845706..2846140)	24	1.82672	2.21916	4.90749	dUTP diphosphatase
gene1032	FE46_RS05110	NZ_CP007627.1	1184754..1185140	24	2.05329	2.49441	4.90749	Phosphoribosyl-ATP pyrophosphohydrolase
gene884	FE46_RS04385	NZ_CP007627.1	1028819..1029370	287	17.2144	20.9127	4.89045	GNAT family N-acetyltransferase
gene2538	FE46_RS12570	NZ_CP007627.1	complement(2842998..2843255)	572	73.4051	89.1751	4.87341	Txe family addiction module toxin
gene1792	FE46_RS08865	NZ_CP007627.1	2027705..2028535	780	31.0773	37.7538	4.83314	membrane
gene1176	FE46_RS05830	NZ_CP007627.1	1344496..1345491	118	3.92258	4.7653	4.8257	UDP-3-O-(3-hydroxymyristoyl)glucosamine N-acyltransferase
gene2467	FE46_RS12215	NZ_CP007627.1	complement(2758977..2760323)	588	14.453	17.5581	4.80934	acetyl- carboxylase biotin carboxylase subunit
gene2249	FE46_RS11140	NZ_CP007627.1	complement(2508720..2509583)	188	7.20433	8.75208	4.80525	hypothetical protein
gene2289	FE46_RS11340	NZ_CP007627.1	complement(2557570..2558388)	1126	45.5202	55.2996	4.79673	energy transducer
gene933	FE46_RS04615	NZ_CP007627.1	complement(1077166..1077480)	422	44.3559	53.8852	4.79389	DNA-directed RNA polymerase subunit omega
gene773	FE46_RS03830	NZ_CP007627.1	895527..896540	70	2.28565	2.77669	4.77117	UDP-N-acetylmuramate dehydrogenase
gene763	FE46_RS03780	NZ_CP007627.1	complement(886459..887253)	93	3.87316	4.70525	4.75413	aminotransferase class IV
gene809	FE46_RS04005	NZ_CP007627.1	933132..934442	1302	32.882	39.9462	4.75413	ribosome biogenesis GTPase Der
gene1821	FE46_RS13260	NZ_CP007627.1	2056120..2056406	93	10.7288	13.0337	4.75413	transposase family
gene1254	FE46_RS06215	NZ_CP007627.1	complement(1428771..1432835)	418	3.40459	4.13602	4.74845	type II CRISPR RNA-guided endonuclease Cas9
gene2474	FE46_RS12250	NZ_CP007627.1	2764819..2766021	142	3.90816	4.74777	4.74777	IS256 family transposase
gene1417	FE46_RS07005	NZ_CP007627.1	1613924..1614925	116	3.83301	4.65648	4.74391	glycosyltransferase family 2
gene1992	FE46_RS09860	NZ_CP007627.1	2233749..2236373	324	4.08663	4.96459	4.73223	cyanophycin synthetase
gene2563	FE46_RS12690	NZ_CP007627.1	complement(2869603..2870208)	162	8.85099	10.7525	4.73223	DUF4254 domain-containing
gene367	FE46_RS01815	NZ_CP007627.1	complement(438704..439105)	4347	358.025	434.942	4.72803	RNA-binding
gene297	FE46_RS01460	NZ_CP007627.1	344404..346155	416	7.86156	9.55051	4.72573	aspartate--tRNA ligase
gene469	FE46_RS02315	NZ_CP007627.1	550731..551972	207	5.51821	6.70372	4.70301	MFS transporter
gene2417	FE46_RS11975	NZ_CP007627.1	complement(2709110..2710240)	132	3.86421	4.69438	4.69438	lipid-A-disaccharide synthase
gene2406	FE46_RS11920	NZ_CP007627.1	complement(2698428..2698607)	21	3.86275	4.69261	4.69261	hypothetical protein
gene2582	FE46_RS12785	NZ_CP007627.1	complement(2888187..2888435)	29	3.8561	4.68453	4.68453	Hypothetical transmembrane
gene2334	FE46_RS11560	NZ_CP007627.1	complement(2617837..2620260)	412	5.62748	6.83647	4.68029	MMPL family transporter
gene931	FE46_RS04605	NZ_CP007627.1	complement(1075070..1075957)	595	22.1847	26.9508	4.67942	DUF4835 family
gene403	FE46_RS01995	NZ_CP007627.1	475695..476867	2102	59.3314	72.0779	4.6719	cytochrome c oxidase subunit II
gene2476	FE46_RS12260	NZ_CP007627.1	complement(2767101..2767607)	137	8.94669	10.8688	4.66893	DUF2480 family
gene2221	FE46_RS11000	NZ_CP007627.1	complement(2477729..2478112)	3142	270.91	329.111	4.6556	30S ribosomal S12
gene962	FE46_RS04760	NZ_CP007627.1	1103600..1103902	590	64.4702	78.3207	4.6401	thioredoxin
gene296	FE46_RS01455	NZ_CP007627.1	complement(343297..344301)	68	2.24023	2.72151	4.63485	redoxin family protein
gene514	FE46_RS02540	NZ_CP007627.1	complement(603354..603581)	68	9.8747	11.9961	4.63485	hypothetical protein
gene1263	FE46_RS06250	NZ_CP007627.1	complement(1441824..1443284)	271	6.14142	7.46082	4.61781	hypothetical protein
gene155	FE46_RS00765	NZ_CP007627.1	complement(185572..186513)	1261	44.3214	53.8433	4.60443	ribose-phosphate pyrophosphokinase
gene25	FE46_RS00130	NZ_CP007627.1	46069..46767	80	3.78933	4.60341	4.60341	CoA transferase subunit A
gene1426	FE46_RS07050	NZ_CP007627.1	1620534..1622987	134	1.80792	2.19633	4.56669	bifunctional UDP-N-acetylmuramoyl-tripeptide:D-alanyl-D-alanine ligase alanine racemase
gene1025	FE46_RS05075	NZ_CP007627.1	complement(1179416..1179775)	268	24.648	29.9433	4.56669	family transcriptional regulator
gene953	FE46_RS04715	NZ_CP007627.1	complement(1094867..1095052)	21	3.73814	4.54123	4.54123	fumarate hydratase
gene2550	FE46_RS12625	NZ_CP007627.1	complement(2856638..2857498)	3151	121.17	147.202	4.53741	ATP synthase F1 subunit gamma
gene147	FE46_RS00725	NZ_CP007627.1	175407..175922	353	22.6503	27.5164	4.51131	N/A
gene454	FE46_RS02240	NZ_CP007627.1	complement(535181..535855)	176	8.63294	10.4876	4.49853	family transcriptional regulator
gene572	FE46_RS02830	NZ_CP007627.1	674093..675250	198	5.66117	6.87739	4.49853	Fic family
gene976	FE46_RS04830	NZ_CP007627.1	1120583..1120957	44	3.88482	4.71942	4.49853	fluoride efflux transporter
gene611	FE46_RS03020	NZ_CP007627.1	complement(718775..719065)	66	7.50932	9.12259	4.49853	helix-turn-helix transcriptional regulator
gene1377	FE46_RS06810	NZ_CP007627.1	1568381..1568923	132	8.04866	9.77781	4.49853	heme NO-binding
gene299	FE46_RS01470	NZ_CP007627.1	complement(346606..347046)	175	13.1386	15.9612	4.47298	tRNA-specific adenosine deaminase
gene439	FE46_RS02170	NZ_CP007627.1	518787..519416	70	3.67881	4.46915	4.46915	16S rRNA (guanine(527)-N(7))-methyltransferase
gene993	FE46_RS04915	NZ_CP007627.1	complement(1135269..1135520)	349	45.8537	55.7047	4.4602	(2Fe-2S) ferredoxin domain-containing
gene6	FE46_RS00035	NZ_CP007627.1	11326..13599	174	2.53343	3.0777	4.44742	AAA family ATPase
gene720	FE46_RS03570	NZ_CP007627.1	complement(844799..845662)	1944	74.4959	90.5003	4.41674	sigma-70 family RNA polymerase sigma factor
gene1267	FE46_RS06265	NZ_CP007627.1	1445560..1447551	216	3.59016	4.36146	4.41674	excinuclease ABC subunit
gene174	FE46_RS00860	NZ_CP007627.1	complement(210196..211491)	280	7.15324	8.69001	4.40416	tyrosine--tRNA ligase
gene396	FE46_RS01960	NZ_CP007627.1	complement(466571..466960)	43	3.65051	4.43477	4.3963	SPOR domain-containing
gene1977	FE46_RS09785	NZ_CP007627.1	2217659..2218300	70	3.61005	4.38561	4.38561	phospholipase
gene1592	FE46_RS07870	NZ_CP007627.1	complement(1810327..1812699)	1670	23.3007	28.3065	4.37794	N/A
gene422	FE46_RS02085	NZ_CP007627.1	498904..499422	4229	269.786	327.746	4.36738	DUF1573 domain-containing
gene1496	FE46_RS07390	NZ_CP007627.1	complement(1708943..1709452)	85	5.51821	6.70372	4.34518	family
gene823	FE46_RS04075	NZ_CP007627.1	complement(954834..956218)	318	7.60198	9.23516	4.33495	Transposase and inactivated derivatives
gene756	FE46_RS03745	NZ_CP007627.1	complement(880390..881106)	656	30.2924	36.8004	4.32704	DUF4290 domain-containing
gene1706	FE46_RS08440	NZ_CP007627.1	1935772..1935993	232	34.6007	42.0342	4.31265	DUF2795 domain-containing
gene295	FE46_RS01450	NZ_CP007627.1	complement(342410..343192)	232	9.81016	11.9177	4.31265	DUF3050 domain-containing protein
gene640	FE46_RS03170	NZ_CP007627.1	754316..756559	1597	23.5631	28.6253	4.29675	M1 family metallopeptidase
gene1753	FE46_RS08670	NZ_CP007627.1	complement(1981373..1982158)	399	16.8074	20.4182	4.29406	alpha beta hydrolase
gene2127	FE46_RS10530	NZ_CP007627.1	complement(2390985..2391791)	86	3.52837	4.2864	4.2864	class I SAM-dependent methyltransferase
gene808	FE46_RS04000	NZ_CP007627.1	932042..932923	291	10.9238	13.2706	4.25024	GTPase Era
gene2187	FE46_RS10830	NZ_CP007627.1	complement(2455659..2456948)	785	20.1479	24.4764	4.2241	phosphopyruvate hydratase
gene1628	FE46_RS08050	NZ_CP007627.1	1852274..1852990	908	41.9292	50.9371	4.2197	bacillithiol biosynthesis deacetylase 1
gene2560	FE46_RS12675	NZ_CP007627.1	complement(2864392..2866983)	392	5.00727	6.08301	4.21872	gliding motility
gene2244	FE46_RS11115	NZ_CP007627.1	2504589..2505929	103	2.54307	3.08941	4.21226	tryptophan repeat-containing
gene338	FE46_RS01665	NZ_CP007627.1	395225..396142	226	8.15108	9.90223	4.20111	ubiquinone biosynthesis protein UbiA
gene1947	FE46_RS09635	NZ_CP007627.1	2184701..2185867	349	9.90157	12.0288	4.19783	DUF1501 domain-containing
gene152	FE46_RS00750	NZ_CP007627.1	complement(180023..182908)	10160	116.559	141.6	4.19698	TonB-dependent receptor
gene1750	FE46_RS08655	NZ_CP007627.1	complement(1978882..1979598)	595	27.4756	33.3784	4.19534	proton channel family
gene1982	FE46_RS09810	NZ_CP007627.1	2221893..2222549	245	12.3467	14.9992	4.17478	endonuclease III
gene1053	FE46_RS05215	NZ_CP007627.1	complement(1209494..1211179)	183	3.59371	4.36577	4.15774	gamma-glutamyltransferase
gene1998	FE46_RS09890	NZ_CP007627.1	2244789..2245397	527	28.6512	34.8065	4.14463	uridine kinase
gene1665	FE46_RS08235	NZ_CP007627.1	complement(1888276..1889328)	81	2.54687	3.09403	4.1407	oxidoreductase
gene848	FE46_RS04205	NZ_CP007627.1	complement(983390..983938)	182	10.9761	13.3342	4.13502	hypothetical protein
gene1495	FE46_RS07385	NZ_CP007627.1	1708131..1708859	101	4.58716	5.57264	4.13047	TIGR00730 family Rossman fold
gene2091	FE46_RS10350	NZ_CP007627.1	complement(2354560..2355591)	121	3.882	4.71599	4.12366	aminodeoxychorismate lyase
gene540	FE46_RS02670	NZ_CP007627.1	632006..633637	80	1.623	1.97168	4.08958	site-specific DNA-methyltransferase
gene108	FE46_RS00545	NZ_CP007627.1	complement(137087..137314)	100	14.5216	17.6414	4.08958	putative addiction module component (TIGR02574 family)
gene1241	FE46_RS06150	NZ_CP007627.1	1410851..1411708	60	2.31533	2.81275	4.08958	nucleotidyl transferase ii ii toxin family
gene585	FE46_RS02895	NZ_CP007627.1	complement(686628..687596)	259	8.84964	10.7509	4.07385	Alpha beta hydrolase
gene1563	FE46_RS07725	NZ_CP007627.1	1778497..1780899	4100	56.4911	68.6274	4.06972	alpha-ketoacid dehydrogenase subunit alpha beta
gene1401	FE46_RS06930	NZ_CP007627.1	1596821..1598986	318	4.86092	5.90522	4.06402	DNA mismatch repair
gene44	FE46_RS00225	NZ_CP007627.1	64863..65729	99	3.78064	4.59286	4.04868	AraC family transcriptional regulator
gene1394	FE46_RS06895	NZ_CP007627.1	1590947..1591813	99	3.78064	4.59286	4.04868	phosphorylase
gene467	FE46_RS02305	NZ_CP007627.1	548737..549300	277	16.2611	19.7546	4.04576	ribosome recycling factor
gene2539	FE46_RS12575	NZ_CP007627.1	complement(2843257..2843511)	336	43.6263	52.9988	4.04146	prevent-host-death
gene2007	FE46_RS09935	NZ_CP007627.1	complement(2253859..2254437)	79	4.5175	5.48802	4.03846	hypothetical protein
gene291	FE46_RS01430	NZ_CP007627.1	complement(337495..339777)	393	5.69949	6.92395	4.01801	ABC transporter substrate-binding protein
gene78	FE46_RS00395	NZ_CP007627.1	100778..101431	98	4.96133	6.0272	4.00779	metal-dependent transcriptional regulator
gene1076	FE46_RS05330	NZ_CP007627.1	complement(1237597..1240224)	861	10.8474	13.1779	4.00128	valine--tRNA ligase
gene2237	FE46_RS11080	NZ_CP007627.1	complement(2497277..2498557)	508	13.13	15.9508	3.9952	family transporter
gene830	FE46_RS04115	NZ_CP007627.1	961004..963667	1602	19.9103	24.1878	3.99482	alanine--tRNA ligase
gene2114	FE46_RS10465	NZ_CP007627.1	2377844..2378191	39	3.71052	4.50768	3.98734	carboxymuconolactone decarboxylase family
gene2393	FE46_RS11855	NZ_CP007627.1	2685585..2686241	39	1.96539	2.38763	3.98734	NADAR family
gene1839	FE46_RS09100	NZ_CP007627.1	2076365..2076784	175	13.7955	16.7593	3.97598	nucleoside-diphosphate kinase
gene899	FE46_RS04450	NZ_CP007627.1	1043811..1045037	1825	49.2457	59.8254	3.96994	NADP-dependent isocitrate dehydrogenase
gene1672	FE46_RS08270	NZ_CP007627.1	complement(1899486..1900433)	1184	41.3517	50.2355	3.9689	thioredoxin-disulfide reductase
gene1441	FE46_RS13240	NZ_CP007627.1	1633403..1633584	77	14.0078	17.0171	3.93622	DDE
gene1765	FE46_RS08730	NZ_CP007627.1	complement(1994925..1996868)	654	11.1386	13.5316	3.93321	DNA topoisomerase (ATP-hydrolyzing) subunit B
gene606	FE46_RS02995	NZ_CP007627.1	complement(707726..708451)	346	15.7794	19.1693	3.93054	membrane spanning
gene2042	FE46_RS10105	NZ_CP007627.1	complement(2291519..2292883)	96	2.32856	2.82882	3.92599	oxygen-independent coproporphyrinogen III oxidase
gene2017	FE46_RS09985	NZ_CP007627.1	2264830..2266647	363	6.61093	8.03119	3.90662	ABC transporter ATP-binding
gene2110	FE46_RS10445	NZ_CP007627.1	2372885..2373124	133	18.3481	22.2899	3.8851	hypothetical protein
gene2323	FE46_RS11505	NZ_CP007627.1	complement(2601899..2602495)	57	3.16119	3.84032	3.8851	hypothetical protein FPG87_11205
gene37	FE46_RS00190	NZ_CP007627.1	complement(58689..59252)	38	2.23077	2.71002	3.8851	DUF3575 domain-containing protein
gene2230	FE46_RS11045	NZ_CP007627.1	complement(2490096..2490791)	38	1.80769	2.19605	3.8851	JAB domain-containing
gene29	FE46_RS00150	NZ_CP007627.1	50731..51387	38	1.915	2.32641	3.8851	CoA transferase subunit B
gene911	FE46_RS04510	NZ_CP007627.1	complement(1057741..1058214)	38	2.65433	3.22458	3.8851	23S rRNA (pseudouridine(1915)-N(3))-methyltransferase
gene24	FE46_RS00125	NZ_CP007627.1	43576..45900	266	3.78799	4.60178	3.8851	penicillin-binding protein
gene1173	FE46_RS05815	NZ_CP007627.1	complement(1342055..1342396)	19	1.8394	2.23457	3.8851	arsenate reductase (glutaredoxin)
gene2026	FE46_RS10025	NZ_CP007627.1	2275440..2277281	1082	19.4486	23.6268	3.88151	DNA mismatch repair
gene968	FE46_RS04790	NZ_CP007627.1	complement(1110715..1111368)	63	3.18943	3.87463	3.87463	RNA methyltransferase
gene924	FE46_RS04575	NZ_CP007627.1	1068281..1070281	473	7.82643	9.50783	3.86874	NAD-dependent DNA ligase
gene2283	FE46_RS11310	NZ_CP007627.1	2550197..2551012	208	8.43962	10.2528	3.86651	membrane associated
gene1700	FE46_RS08410	NZ_CP007627.1	1930472..1932334	661	11.7473	14.271	3.86173	ABC-F family ATP-binding cassette domain-containing
gene57	FE46_RS00290	NZ_CP007627.1	77939..78172	771	109.091	132.527	3.8452	hypothetical protein
gene2164	FE46_RS10715	NZ_CP007627.1	complement(2430084..2431220)	150	4.36798	5.30638	3.83398	UDP-N-acetylglucosamine 2-epimerase (non-hydrolyzing)
gene2534	FE46_RS12550	NZ_CP007627.1	complement(2837598..2838941)	429	10.5684	12.8388	3.81398	cytochrome C biosynthesis
gene1105	FE46_RS05475	NZ_CP007627.1	complement(1263671..1264234)	149	8.74695	10.6261	3.80842	ferritin-like domain-containing
gene1852	FE46_RS09160	NZ_CP007627.1	2089673..2090596	87	3.11743	3.78717	3.78717	prenyltransferase
gene2427	FE46_RS13300	NZ_CP007627.1	2722510..2722881	35	3.11512	3.78436	3.78436	hypothetical protein
gene631	FE46_RS03125	NZ_CP007627.1	complement(745809..746852)	74	2.34683	2.85101	3.78286	tyrosine-type recombinase integrase
gene984	FE46_RS04870	NZ_CP007627.1	1127494..1127952	37	2.66894	3.24232	3.78286	peroxiredoxin
gene950	FE46_RS04700	NZ_CP007627.1	1092304..1093356	129	4.05612	4.92752	3.76825	Dihydroorotate dehydrogenase (quinone)
gene436	FE46_RS02155	NZ_CP007627.1	complement(515000..516232)	115	3.08805	3.75148	3.75148	phosphoribosylglycinamide formyltransferase 2
gene241	FE46_RS01195	NZ_CP007627.1	279754..282063	215	3.0816	3.74364	3.74364	patatin
gene2574	FE46_RS12745	NZ_CP007627.1	complement(2879609..2881297)	311	6.0965	7.40624	3.74076	hypothetical protein
gene996	FE46_RS04930	NZ_CP007627.1	1138317..1139009	73	3.4877	4.23699	3.73174	DUF1003 domain-containing
gene357	FE46_RS01765	NZ_CP007627.1	complement(423205..424029)	73	2.92967	3.55907	3.73174	thymidylate synthase
gene1796	FE46_RS08885	NZ_CP007627.1	complement(2032830..2033369)	146	8.95177	10.8749	3.73174	GNAT family N-acetyltransferase
gene1096	FE46_RS05430	NZ_CP007627.1	complement(1257898..1258218)	91	9.38612	11.4026	3.72152	sterol desaturase family
gene1424	FE46_RS07040	NZ_CP007627.1	complement(1618912..1619739)	200	7.99741	9.71554	3.7178	hypothetical protein
gene2224	FE46_RS11015	NZ_CP007627.1	2483551..2485029	309	6.91735	8.40345	3.7167	family nutrient-binding outer membrane lipo
gene582	FE46_RS02880	NZ_CP007627.1	complement(683699..684901)	526	14.4767	17.5868	3.70882	IS256 family transposase
gene2120	FE46_RS10495	NZ_CP007627.1	complement(2383587..2384309)	54	2.47289	3.00416	3.68062	DUF4184 family
gene456	FE46_RS02250	NZ_CP007627.1	537574..538005	54	4.13866	5.02779	3.68062	Hypothetical transmembrane
gene340	FE46_RS01675	NZ_CP007627.1	397301..397663	90	8.20891	9.97248	3.68062	nuclear transport factor 2 family
gene489	FE46_RS02415	NZ_CP007627.1	complement(575329..577749)	664	9.08078	11.0317	3.66957	ribonucleoside-diphosphate reductase subunit alpha
gene1788	FE46_RS08845	NZ_CP007627.1	2022507..2023820	1181	29.758	36.1511	3.65893	family
gene1731	FE46_RS08565	NZ_CP007627.1	1962671..1963165	45	3.00993	3.65658	3.65658	hypothetical protein FPSM_01778
gene1913	FE46_RS09465	NZ_CP007627.1	complement(2143480..2144484)	91	2.99795	3.64202	3.64202	S-layer repressor
gene1429	FE46_RS07065	NZ_CP007627.1	1625282..1625689	89	7.22237	8.77399	3.63972	tRNA (adenosine(37)-N6)-threonylcarbamoyltransferase complex ATPase subunit type 1
gene2218	FE46_RS10985	NZ_CP007627.1	complement(2474742..2475047)	1902	205.797	250.009	3.63476	30S ribosomal S10
gene1118	FE46_RS05540	NZ_CP007627.1	complement(1278196..1279254)	302	9.44193	11.4704	3.63251	nucleoid-associated
gene2199	FE46_RS10890	NZ_CP007627.1	complement(2466152..2466334)	2095	379.038	460.469	3.63037	50S ribosomal L30
gene1856	FE46_RS09180	NZ_CP007627.1	complement(2093947..2094789)	71	2.78856	3.38765	3.6295	dihydropteroate synthase
gene2196	FE46_RS10875	NZ_CP007627.1	complement(2464114..2464329)	781	119.715	145.434	3.6295	Translation initiation factor IF-1
gene1908	FE46_RS09440	NZ_CP007627.1	complement(2137951..2139360)	124	2.91174	3.53728	3.6222	c-type cytochrome
gene380	FE46_RS01880	NZ_CP007627.1	complement(449753..450103)	336	31.6943	38.5034	3.61605	membrane-binding
gene2555	FE46_RS12650	NZ_CP007627.1	complement(2860552..2861721)	3871	109.544	133.077	3.61433	ATP synthase F0 subunit A
gene1415	FE46_RS06995	NZ_CP007627.1	complement(1612379..1613383)	159	5.23818	6.36353	3.61246	DNA polymerase III subunit delta
gene1013	FE46_RS05015	NZ_CP007627.1	1166240..1167178	158	5.5711	6.76798	3.58974	nitronate monooxygenase
gene887	FE46_RS04400	NZ_CP007627.1	complement(1030463..1032595)	351	5.44836	6.61887	3.5886	dipeptidyl carboxypeptidase II
gene2489	FE46_RS12325	NZ_CP007627.1	2781069..2781809	35	1.56387	1.89984	3.57838	hypothetical protein
gene2497	FE46_RS12365	NZ_CP007627.1	2790249..2790602	35	3.27352	3.97678	3.57838	hypothetical protein
gene1775	FE46_RS08780	NZ_CP007627.1	complement(2011166..2011477)	35	3.71418	4.51212	3.57838	rhodanese-like domain-containing
gene2281	FE46_RS11300	NZ_CP007627.1	2548863..2549483	157	8.37062	10.1689	3.56702	outer membrane beta-barrel
gene1320	FE46_RS06525	NZ_CP007627.1	complement(1501373..1502509)	87	2.53343	3.0777	3.55793	bifunctional histidinol-phosphatase imidazoleglycerol-phosphate dehydratase
gene2509	FE46_RS12425	NZ_CP007627.1	2811705..2812535	52	2.07182	2.51692	3.5443	rod shape-determining
gene1789	FE46_RS08850	NZ_CP007627.1	2023834..2024913	1057	32.4042	39.3658	3.54318	family secretion
gene784	FE46_RS03885	NZ_CP007627.1	complement(906288..907916)	2319	47.1335	57.2594	3.53871	chaperonin
gene1640	FE46_RS08110	NZ_CP007627.1	complement(1866774..1867868)	431	13.0321	15.8318	3.52522	redox-regulated ATPase
gene23	FE46_RS00120	NZ_CP007627.1	43058..43570	103	6.64767	8.07583	3.51022	gliding motility lipoprotein GldH
gene1984	FE46_RS09820	NZ_CP007627.1	complement(2223239..2224495)	429	11.2998	13.7274	3.50886	MFS transporter
gene1461	FE46_RS07215	NZ_CP007627.1	1658545..1659126	290	16.4977	20.0421	3.48817	phosphatase
gene1895	FE46_RS09375	NZ_CP007627.1	2124657..2125685	89	2.86368	3.4789	3.4789	iron ABC transporter permease
gene2126	FE46_RS10525	NZ_CP007627.1	complement(2390425..2390979)	48	2.8635	3.47869	3.47869	serine acetyltransferase
gene2175	FE46_RS10770	NZ_CP007627.1	complement(2442190..2443461)	110	2.86322	3.47835	3.47835	nucleotide sugar dehydrogenase
gene1698	FE46_RS08400	NZ_CP007627.1	complement(1928647..1929813)	85	2.41156	2.92965	3.47614	glycosyltransferase family 2
gene1501	FE46_RS07415	NZ_CP007627.1	1712756..1713424	34	1.68268	2.04418	3.47614	methyltransferase domain-containing
gene1133	FE46_RS05615	NZ_CP007627.1	complement(1291706..1292272)	51	2.97808	3.61788	3.47614	threonylcarbamoyl-AMP synthase
gene2372	FE46_RS11750	NZ_CP007627.1	2657804..2658574	51	2.19011	2.66062	3.47614	family deoxyribonuclease
gene1903	FE46_RS09415	NZ_CP007627.1	complement(2132941..2133753)	119	4.84625	5.8874	3.47614	purine-nucleoside phosphorylase
gene2361	FE46_RS11695	NZ_CP007627.1	complement(2645991..2646425)	17	1.29393	1.57191	3.47614	3-hydroxymyristoyl 3-hydroxydecanoyl-(acyl carrier ) dehydratase
gene1457	FE46_RS07195	NZ_CP007627.1	complement(1653540..1654358)	85	3.43625	4.17448	3.47614	3-methyl-2-oxobutanoate hydroxymethyltransferase
gene2366	FE46_RS11720	NZ_CP007627.1	complement(2651209..2651460)	17	2.23356	2.71341	3.47614	acyl carrier
gene2408	FE46_RS11930	NZ_CP007627.1	complement(2698817..2699212)	34	2.84272	3.45343	3.45343	hypothetical protein
gene150	FE46_RS00740	NZ_CP007627.1	complement(177926..179092)	3719	105.513	128.181	3.44098	iron-containing alcohol dehydrogenase
gene68	FE46_RS00345	NZ_CP007627.1	complement(88578..89927)	168	4.12027	5.00545	3.43524	magnesium transporter
gene1546	FE46_RS07640	NZ_CP007627.1	complement(1760975..1762270)	1409	35.9961	43.7294	3.42989	DNA (cytosine-5-)-methyltransferase
gene988	FE46_RS04890	NZ_CP007627.1	1129673..1130086	201	16.0748	19.5282	3.42502	hypothetical protein
gene1376	FE46_RS06805	NZ_CP007627.1	1567960..1568373	67	5.35826	6.50941	3.42502	response regulator
gene1157	FE46_RS05735	NZ_CP007627.1	complement(1317942..1318937)	301	10.0059	12.1555	3.41934	zinc metalloprotease
gene247	FE46_RS01225	NZ_CP007627.1	288432..289664	301	8.08264	9.81908	3.41934	peptidoglycan DD-metalloendopeptidase family protein
gene281	FE46_RS01380	NZ_CP007627.1	complement(325685..326623)	167	5.88844	7.15349	3.4148	outer membrane beta-barrel protein
gene846	FE46_RS04195	NZ_CP007627.1	980680..981906	784	21.1554	25.7003	3.41088	amino acid dehydrogenase
gene2225	FE46_RS11020	NZ_CP007627.1	2485096..2485830	283	12.7482	15.487	3.40397	23S rRNA (guanosine(2251)-2 -O)-methyltransferase
gene2176	FE46_RS10775	NZ_CP007627.1	complement(2443472..2444452)	83	2.80129	3.40311	3.40311	SDR family oxidoreductase
gene2374	FE46_RS11760	NZ_CP007627.1	2659750..2660778	87	2.79933	3.40072	3.40072	asparaginase
gene2448	FE46_RS12120	NZ_CP007627.1	complement(2737998..2738783)	399	16.8074	20.4182	3.39946	undecaprenyl-diphosphate phosphatase
gene982	FE46_RS04860	NZ_CP007627.1	1126457..1126984	83	5.20468	6.32283	3.39435	isopentenyl-diphosphate Delta-isomerase
gene623	FE46_RS03085	NZ_CP007627.1	complement(734771..736155)	282	6.74138	8.18967	3.39194	Transposase and inactivated derivatives
gene315	FE46_RS01550	NZ_CP007627.1	complement(366587..369433)	149	1.7328	2.10507	3.38526	DNA polymerase I
gene442	FE46_RS13150	NZ_CP007627.1	521770..521913	33	7.58754	9.21762	3.3739	bacteriocin
gene2295	FE46_RS11370	NZ_CP007627.1	complement(2563956..2566340)	148	2.05458	2.49598	3.36254	penicillin acylase family
gene2362	FE46_RS11700	NZ_CP007627.1	complement(2646431..2647564)	180	5.25544	6.3845	3.34602	beta-ketoacyl-ACP synthase III
gene1523	FE46_RS07525	NZ_CP007627.1	complement(1732709..1733407)	49	2.32096	2.81959	3.33982	iron transporter
gene2018	FE46_RS09990	NZ_CP007627.1	2266977..2267678	49	2.31105	2.80754	3.33982	DUF2971 domain-containing
gene1974	FE46_RS09770	NZ_CP007627.1	2214060..2215988	98	1.68207	2.04344	3.33982	membrane
gene2172	FE46_RS10755	NZ_CP007627.1	complement(2438779..2439660)	98	3.67881	4.46915	3.33982	glucose-1-phosphate thymidylyltransferase
gene2152	FE46_RS10655	NZ_CP007627.1	2417231..2417956	147	6.70394	8.14419	3.33982	histidinol phosphatase
gene1853	FE46_RS09165	NZ_CP007627.1	2090586..2091173	49	2.75911	3.35186	3.33982	septum formation Maf
gene627	FE46_RS13175	NZ_CP007627.1	741367..742017	407	20.6997	25.1467	3.32892	HNH endonuclease domain
gene618	FE46_RS03055	NZ_CP007627.1	complement(727679..729063)	293	7.00434	8.50913	3.32846	Transposase and inactivated derivatives
gene1785	FE46_RS08830	NZ_CP007627.1	2019844..2020605	146	6.34377	7.70664	3.3171	tryptophan synthase subunit alpha
gene240	FE46_RS01190	NZ_CP007627.1	277942..279741	81	1.48992	1.81001	3.31256	excinuclease ABC subunit UvrC
gene2253	FE46_RS11160	NZ_CP007627.1	complement(2514219..2515682)	97	2.19372	2.665	3.30574	oligosaccharide flippase family
gene2248	FE46_RS11135	NZ_CP007627.1	complement(2507512..2508627)	403	11.9561	14.5247	3.2962	ATP-binding
gene2458	FE46_RS12170	NZ_CP007627.1	2747436..2749337	161	2.80263	3.40473	3.29211	S9 family peptidase
gene1851	FE46_RS09155	NZ_CP007627.1	2089099..2089626	43	2.6964	3.27568	3.27568	HAD-IIIA family hydrolase
gene1121	FE46_RS05555	NZ_CP007627.1	complement(1280337..1281086)	48	2.11899	2.57423	3.27166	T9SS type A sorting domain-containing
gene394	FE46_RS01950	NZ_CP007627.1	465419..466060	64	3.30061	4.0097	3.27166	lysine transporter
gene1680	FE46_RS08310	NZ_CP007627.1	complement(1910193..1911059)	144	5.49912	6.68053	3.27166	superoxide dismutase
gene930	FE46_RS04600	NZ_CP007627.1	complement(1073408..1075060)	511	10.2352	12.4341	3.26527	DNA repair
gene2292	FE46_RS11355	NZ_CP007627.1	complement(2559662..2560480)	1722	69.6144	84.57	3.2603	proton channel family
gene1120	FE46_RS05550	NZ_CP007627.1	complement(1279711..1280250)	127	7.78681	9.4597	3.2461	p 4b ORF-3
gene485	FE46_RS02395	NZ_CP007627.1	complement(571808..572632)	2030	81.4689	98.9713	3.24291	elongation factor Ts
gene429	FE46_RS02120	NZ_CP007627.1	507606..509114	79	1.73335	2.10574	3.23077	GH3 auxin-responsive promoter family
gene1370	FE46_RS06775	NZ_CP007627.1	1561162..1561896	59	2.65775	3.22873	3.22873	diphthine--ammonia ligase
gene642	FE46_RS03180	NZ_CP007627.1	758354..759376	82	2.65392	3.22408	3.22408	Holliday junction branch migration DNA helicase
gene612	FE46_RS03025	NZ_CP007627.1	complement(719068..719409)	63	6.09908	7.40938	3.22054	type II toxin-antitoxin system family toxin
gene951	FE46_RS04705	NZ_CP007627.1	1093379..1094245	126	4.81173	5.84546	3.22054	hydroxymethylglutaryl- lyase
gene1632	FE46_RS08070	NZ_CP007627.1	1854877..1855491	126	6.78336	8.24067	3.22054	PASTA domain-containing
gene1289	FE46_RS06370	NZ_CP007627.1	complement(1465846..1466472)	110	5.80864	7.05655	3.21324	Crp Fnr family transcriptional regulator
gene607	FE46_RS03000	NZ_CP007627.1	710024..710248	220	32.3735	39.3285	3.21324	hypothetical protein
gene1748	FE46_RS08645	NZ_CP007627.1	1977221..1978177	924	31.9676	38.8354	3.20235	family
gene1194	FE46_RS05920	NZ_CP007627.1	1360186..1361142	76	2.62937	3.19425	3.19425	2-dehydropantoate 2-reductase
gene2147	FE46_RS10630	NZ_CP007627.1	complement(2411297..2412556)	100	2.62772	3.19225	3.19225	ABC transporter ATP-binding
gene1421	FE46_RS07025	NZ_CP007627.1	1616138..1617760	78	1.5912	1.93305	3.18987	adenine deaminase
gene2488	FE46_RS12320	NZ_CP007627.1	2779191..2781062	280	4.95224	6.01616	3.18078	M1 family metallopeptidase
gene488	FE46_RS02410	NZ_CP007627.1	complement(574074..574529)	1007	73.1163	88.8243	3.16785	50S ribosomal L13
gene1718	FE46_RS08500	NZ_CP007627.1	complement(1948135..1949043)	1238	45.0927	54.7803	3.16431	prohibitin family
gene1538	FE46_RS07600	NZ_CP007627.1	complement(1754509..1755363)	416	16.1093	19.5702	3.15049	metalloprotease
gene1399	FE46_RS06920	NZ_CP007627.1	1594975..1595919	74	2.59268	3.14969	3.14969	transglutaminase
gene119	FE46_RS00600	NZ_CP007627.1	151563..153074	3830	83.8681	101.886	3.13262	F0F1 ATP synthase subunit beta
gene2284	FE46_RS11315	NZ_CP007627.1	2551073..2551957	76	2.84328	3.45412	3.10808	IS982 family transposase
gene1276	FE46_RS06305	NZ_CP007627.1	complement(1454583..1455164)	76	4.32355	5.2524	3.10808	Yip1 domain-containing [Flavobacterium psychrophilum DSM 3660]
gene111	FE46_RS00560	NZ_CP007627.1	complement(140041..141000)	379	13.0713	15.8794	3.0999	flippase-like domain-containing protein
gene1565	FE46_RS07735	NZ_CP007627.1	complement(1782166..1783917)	500	9.44899	11.479	3.09816	transcription termination factor Rho
gene2021	FE46_RS10005	NZ_CP007627.1	complement(2271042..2272733)	227	4.44197	5.39626	3.09445	M23 family metallopeptidase
gene1071	FE46_RS05305	NZ_CP007627.1	complement(1231188..1233095)	121	2.0997	2.55079	3.09274	DUF2207 domain-containing
gene1451	FE46_RS07165	NZ_CP007627.1	1643926..1646844	2022	22.9349	27.8621	3.08549	peptidase M16
gene1153	FE46_RS05715	NZ_CP007627.1	1314377..1315018	49	2.52703	3.06993	3.06993	M15 family metallopeptidase
gene1262	FE46_RS13215	NZ_CP007627.1	complement(1441015..1441301)	105	12.1131	14.7155	3.06718	transposase family
gene991	FE46_RS04905	NZ_CP007627.1	1134203..1134550	165	15.6984	19.0709	3.06718	hypothetical protein
gene790	FE46_RS13185	NZ_CP007627.1	complement(911958..912298)	30	2.91284	3.53862	3.06718	xxY
gene1202	FE46_RS05960	NZ_CP007627.1	complement(1366848..1367102)	15	1.9476	2.36602	3.06718	hypothetical protein
gene1894	FE46_RS09370	NZ_CP007627.1	2123513..2124655	90	2.60703	3.16711	3.06718	ABC transporter substrate-binding
gene2180	FE46_RS10795	NZ_CP007627.1	2448508..2450004	75	1.65878	2.01515	3.06718	sodium:solute symporter
gene1542	FE46_RS07620	NZ_CP007627.1	complement(1757875..1758342)	254	17.9696	21.8301	3.05515	hypothetical protein
gene604	FE46_RS02985	NZ_CP007627.1	705612..705836	178	26.1931	31.8203	3.0331	hypothetical protein
gene2039	FE46_RS10090	NZ_CP007627.1	2289980..2290429	74	5.44464	6.61434	3.02629	family
gene1579	FE46_RS07805	NZ_CP007627.1	1797733..1798410	51	2.49052	3.02557	3.02557	Crp Fnr family transcriptional regulator
gene2407	FE46_RS11925	NZ_CP007627.1	complement(2698594..2698806)	16	2.48708	3.0214	3.0214	hypothetical protein
gene1481	FE46_RS07315	NZ_CP007627.1	1687491..1688372	310	11.637	14.1371	3.0185	lipid A biosynthesis acyltransferase
gene2322	FE46_RS11500	NZ_CP007627.1	2600136..2601527	896	21.3117	25.8902	3.00349	Probable lipo precursor
gene2306	FE46_RS11420	NZ_CP007627.1	complement(2577105..2577656)	44	2.63914	3.20613	2.99902	NADH-quinone oxidoreductase subunit I
gene2410	FE46_RS11940	NZ_CP007627.1	2700240..2700443	117	18.9891	23.0687	2.9905	hypothetical protein
gene2594	FE46_RS12845	NZ_CP007627.1	complement(2898584..2900089)	687	15.1036	18.3484	2.98887	glutamate--tRNA ligase
gene1055	FE46_RS05225	NZ_CP007627.1	complement(1213095..1213481)	190	16.2552	19.7474	2.98854	peptide-methionine (R)-S-oxide reductase
gene13	FE46_RS00070	NZ_CP007627.1	19591..21024	2709	62.5474	75.9849	2.97814	putative adhesin SprC
gene2308	FE46_RS11430	NZ_CP007627.1	complement(2578689..2579744)	233	7.30536	8.87482	2.97772	2Fe-2S iron-sulfur cluster binding domain-containing
gene1075	FE46_RS05325	NZ_CP007627.1	1236534..1237421	931	34.7125	42.17	2.97453	hypothetical protein
gene632	FE46_RS03130	NZ_CP007627.1	complement(747209..748726)	112	2.44284	2.96766	2.96766	2,3-bisphosphoglycerate-independent phosphoglycerate mutase
gene319	FE46_RS01570	NZ_CP007627.1	complement(371941..373098)	174	4.97497	6.04377	2.96494	ABC transporter permease
gene1526	FE46_RS07540	NZ_CP007627.1	complement(1737304..1738095)	29	1.21233	1.47279	2.96494	(Fe-S)-binding
gene426	FE46_RS02105	NZ_CP007627.1	503231..505828	2250	28.6743	34.8346	2.94921	family
gene2122	FE46_RS10505	NZ_CP007627.1	complement(2385457..2386851)	72	1.70887	2.07599	2.9445	sugar transferase
gene2194	FE46_RS10865	NZ_CP007627.1	complement(2463617..2463991)	718	63.3932	77.0124	2.93632	30S ribosomal S13
gene384	FE46_RS01900	NZ_CP007627.1	455415..456479	129	4.01042	4.872	2.93086	two-component sensor histidine kinase
gene1754	FE46_RS08675	NZ_CP007627.1	complement(1982214..1983008)	43	1.79082	2.17555	2.93086	ABC transporter substrate-binding
gene375	FE46_RS01855	NZ_CP007627.1	complement(445247..446107)	43	1.65354	2.00878	2.93086	family
gene1264	FE46_RS06255	NZ_CP007627.1	complement(1443281..1444588)	71	1.79722	2.18332	2.9036	M48 family metalloprotease
gene2442	FE46_RS12090	NZ_CP007627.1	2734068..2734703	71	3.69616	4.49023	2.9036	leucyl phenylalanyl-tRNA-- transferase
gene1493	FE46_RS07375	NZ_CP007627.1	1703685..1706156	170	2.27693	2.7661	2.89678	AAA domain-containing
gene1971	FE46_RS09755	NZ_CP007627.1	2209165..2210844	184	3.62625	4.4053	2.89416	gliding motility-associated ABC transporter substrate-binding
gene2084	FE46_RS10315	NZ_CP007627.1	complement(2348263..2349165)	523	19.1762	23.296	2.89034	1-aminocyclopropane-1-carboxylate deaminase
gene1695	FE46_RS08385	NZ_CP007627.1	1926008..1926217	15	2.36495	2.87302	2.87302	hypothetical protein
gene2227	FE46_RS11030	NZ_CP007627.1	2486959..2488236	91	2.35755	2.86403	2.86403	replication-associated recombination A
gene1147	FE46_RS05685	NZ_CP007627.1	complement(1305720..1306679)	56	1.93137	2.3463	2.8627	Exostosin family
gene1593	FE46_RS07875	NZ_CP007627.1	complement(1813090..1814031)	56	1.96828	2.39114	2.8627	type IX secretion system membrane
gene2165	FE46_RS10720	NZ_CP007627.1	complement(2431232..2432350)	140	4.14236	5.03229	2.8627	epimerase
gene1165	FE46_RS05775	NZ_CP007627.1	1329636..1330247	42	2.27221	2.76036	2.8627	hypothetical protein
gene1100	FE46_RS05450	NZ_CP007627.1	1260107..1261759	126	2.52376	3.06595	2.8627	2-succinyl-5-enolpyruvyl-6-hydroxy-3-cyclohexene-1-carboxylate synthase
gene2548	FE46_RS12615	NZ_CP007627.1	complement(2852819..2853805)	42	1.40891	1.71159	2.8627	ATP-grasp domain-containing
gene737	FE46_RS03650	NZ_CP007627.1	860663..861004	2040	197.494	239.923	2.8571	metal transporter
gene935	FE46_RS04625	NZ_CP007627.1	complement(1078385..1079266)	893	33.5222	40.724	2.85312	4-hydroxy-tetrahydrodipicolinate synthase
gene1859	FE46_RS09195	NZ_CP007627.1	2096784..2097281	418	27.7905	33.7609	2.84907	alkyl hydroperoxide reductase
gene1390	FE46_RS06875	NZ_CP007627.1	complement(1586494..1588470)	627	10.5005	12.7564	2.84907	dehydrogenase
gene1759	FE46_RS08700	NZ_CP007627.1	complement(1986344..1987447)	640	19.1938	23.3173	2.84492	N/A
gene72	FE46_RS00365	NZ_CP007627.1	complement(92177..93955)	111	2.06584	2.50966	2.83714	tetratricopeptide repeat protein
gene596	FE46_RS02945	NZ_CP007627.1	complement(696884..697609)	208	9.48585	11.5238	2.83544	membrane spanning
gene145	FE46_RS00715	NZ_CP007627.1	173392..174627	87	2.33051	2.83118	2.83118	ATP-binding protein
gene227	FE46_RS01125	NZ_CP007627.1	complement(265467..266021)	39	2.3266	2.82643	2.82643	crossover junction endodeoxyribonuclease RuvC
gene1990	FE46_RS09850	NZ_CP007627.1	complement(2231644..2232486)	69	2.71001	3.29222	2.82181	asparaginase
gene1348	FE46_RS06665	NZ_CP007627.1	1534985..1535593	69	3.7513	4.55721	2.82181	16S rRNA (guanine(966)-N(2))-methyltransferase
gene847	FE46_RS04200	NZ_CP007627.1	982090..982971	317	11.8998	14.4563	2.81825	energy transducer
gene2260	FE46_RS11195	NZ_CP007627.1	complement(2521435..2522034)	42	2.31765	2.81556	2.81556	sprT domain-containing
gene629	FE46_RS03115	NZ_CP007627.1	complement(743009..743794)	330	13.9008	16.8872	2.81158	hypothetical protein
gene232	FE46_RS01150	NZ_CP007627.1	complement(269459..269860)	28	2.30612	2.80156	2.80156	hypothetical protein FPSM_00240
gene2540	FE46_RS12580	NZ_CP007627.1	complement(2843914..2844546)	41	2.14452	2.60524	2.79454	Hypothetical transmembrane
gene223	FE46_RS01105	NZ_CP007627.1	complement(262349..263059)	41	1.90925	2.31943	2.79454	PH domain-containing protein
gene1704	FE46_RS08430	NZ_CP007627.1	1934258..1934944	204	9.83157	11.9438	2.78091	ABC transporter ATP-binding
gene2025	FE46_RS10020	NZ_CP007627.1	2273724..2275286	639	13.536	16.4441	2.78004	ribonuclease Y
gene1507	FE46_RS07445	NZ_CP007627.1	1718746..1719456	298	13.877	16.8583	2.76976	family DNA-binding transcriptional regulator
gene1484	FE46_RS07330	NZ_CP007627.1	complement(1691077..1692354)	501	12.9795	15.7679	2.76875	DNA (cytosine-5-)-methyltransferase
gene1467	FE46_RS07245	NZ_CP007627.1	1668508..1668828	81	8.35468	10.1496	2.76046	family nucleoid-associated
gene1502	FE46_RS07420	NZ_CP007627.1	complement(1713416..1713892)	27	1.87411	2.27674	2.76046	N/A
gene2001	FE46_RS09905	NZ_CP007627.1	2247282..2247731	27	1.98656	2.41334	2.76046	glycine zipper family
gene1413	FE46_RS06985	NZ_CP007627.1	1610508..1611560	188	5.91125	7.1812	2.74586	glutamine cyclotransferase
gene492	FE46_RS02430	NZ_CP007627.1	580106..580684	188	10.7505	13.0601	2.74586	family
gene956	FE46_RS04730	NZ_CP007627.1	1097783..1099717	5489	93.9208	114.098	2.73752	DEAD DEAH box helicase
gene1515	FE46_RS07485	NZ_CP007627.1	1725041..1725187	10	2.25233	2.73621	2.73621	hypothetical protein
gene850	FE46_RS04215	NZ_CP007627.1	986941..988014	1545	47.6293	57.8617	2.72345	peptide chain release factor 1
gene154	FE46_RS00760	NZ_CP007627.1	complement(184873..185484)	1396	75.5238	91.749	2.7186	50S ribosomal protein L25/general stress protein Ctc
gene2294	FE46_RS11365	NZ_CP007627.1	complement(2562526..2563869)	146	3.59669	4.36939	2.71399	Kynurenine 3-monooxygenase
gene1184	FE46_RS05870	NZ_CP007627.1	1351686..1352327	53	2.73332	3.32054	2.70934	outer membrane lipo carrier
gene2279	FE46_RS11290	NZ_CP007627.1	complement(2546707..2547099)	331	27.8859	33.8768	2.7073	transporter
gene1916	FE46_RS09480	NZ_CP007627.1	complement(2146108..2147070)	66	2.26917	2.75667	2.69912	FAD: FMN transferase
gene700	FE46_RS03470	NZ_CP007627.1	823936..824259	184	18.8028	22.8423	2.68744	gliding motility
gene2150	FE46_RS10645	NZ_CP007627.1	2415485..2416081	92	5.10227	6.19842	2.68744	Hypothetical lipo precursor
gene2511	FE46_RS12435	NZ_CP007627.1	2813031..2814971	92	1.56932	1.90647	2.68744	penicillin-binding 2
gene473	FE46_RS02335	NZ_CP007627.1	558264..558638	144	12.714	15.4454	2.67681	hypothetical protein
gene2222	FE46_RS11005	NZ_CP007627.1	2478590..2480239	52	1.04344	1.26761	2.65823	outer membrane
gene1280	FE46_RS06325	NZ_CP007627.1	complement(1457068..1457952)	78	2.91811	3.54502	2.65823	helix-turn-helix domain-containing
gene1656	FE46_RS08190	NZ_CP007627.1	1880757..1881902	39	1.12676	1.36882	2.65823	site-specific integrase
gene428	FE46_RS02115	NZ_CP007627.1	506973..507584	78	4.21981	5.12638	2.65823	N-acetylmuramoyl-L-alanine amidase
gene1283	FE46_RS06340	NZ_CP007627.1	complement(1458626..1459639)	39	1.27343	1.54701	2.65823	cytochrome c
gene936	FE46_RS04630	NZ_CP007627.1	complement(1079271..1079789)	246	15.6934	19.0649	2.64746	hypothetical protein
gene564	FE46_RS02790	NZ_CP007627.1	complement(663409..664317)	116	4.22517	5.13288	2.63551	hypothetical protein
gene841	FE46_RS04170	NZ_CP007627.1	complement(974379..975434)	69	2.16339	2.62816	2.62816	DUF3810 domain-containing
gene1838	FE46_RS09095	NZ_CP007627.1	2074652..2076247	104	2.1575	2.621	2.621	bacillithiol biosynthesis cysteine-adding enzyme
gene262	FE46_RS13120	NZ_CP007627.1	complement(305469..305984)	51	3.27243	3.97546	2.60711	hypothetical protein
gene658	FE46_RS03260	NZ_CP007627.1	complement(782477..783151)	178	8.73104	10.6068	2.5998	hypothetical protein
gene2285	FE46_RS11320	NZ_CP007627.1	2552029..2554269	317	4.68346	5.68964	2.59279	membrane associated
gene1616	FE46_RS07990	NZ_CP007627.1	1842710..1843873	114	3.24266	3.9393	2.59007	sigma-54-dependent Fis family transcriptional regulator
gene43	FE46_RS00220	NZ_CP007627.1	complement(63392..64633)	240	6.39793	7.77243	2.58289	Glutamyl-tRNA reductase
gene777	FE46_RS03850	NZ_CP007627.1	898507..899853	63	1.54854	1.88122	2.57643	DNA recombination
gene1126	FE46_RS05580	NZ_CP007627.1	1286331..1286657	63	6.37885	7.74926	2.57643	2TM domain-containing
gene2233	FE46_RS11060	NZ_CP007627.1	complement(2493074..2495224)	239	3.67881	4.46915	2.57213	peptidase S46
gene882	FE46_RS04375	NZ_CP007627.1	complement(1025915..1028155)	993	14.6709	17.8227	2.57022	M1 family metallopeptidase
gene2552	FE46_RS12635	NZ_CP007627.1	complement(2859196..2859729)	892	55.3061	67.1879	2.56895	ATP synthase F1 subunit delta
gene2457	FE46_RS12165	NZ_CP007627.1	2746983..2747372	50	4.24478	5.15671	2.55599	HIT family
gene1487	FE46_RS07345	NZ_CP007627.1	complement(1693927..1694526)	38	2.09692	2.54741	2.54741	response regulator
gene1880	FE46_RS09300	NZ_CP007627.1	2110548..2112011	472	10.6746	12.9679	2.53984	phytoene desaturase
gene1712	FE46_RS08470	NZ_CP007627.1	1943213..1943323	7	2.08797	2.53654	2.53654	N/A
gene270	FE46_RS01325	NZ_CP007627.1	complement(313643..314854)	62	1.69371	2.05758	2.53554	aminotransferase class I/II-fold pyridoxal phosphate-dependent enzyme
gene1249	FE46_RS06190	NZ_CP007627.1	complement(1423135..1423980)	53	2.07422	2.51984	2.51984	IS3 family transposase
gene741	FE46_RS03670	NZ_CP007627.1	863795..864487	661	31.5804	38.365	2.50297	alkaline phosphatase
gene1835	FE46_RS09080	NZ_CP007627.1	2070492..2071688	74	2.04686	2.48659	2.48659	HAMP domain-containing histidine kinase
gene1483	FE46_RS07325	NZ_CP007627.1	complement(1690163..1691047)	158	5.91103	7.18094	2.4852	hypothetical protein, partial
gene1562	FE46_RS07720	NZ_CP007627.1	1775547..1778312	170	2.03492	2.47209	2.47209	aminopeptidase N
gene943	FE46_RS04665	NZ_CP007627.1	1086581..1087165	205	11.6024	14.095	2.46577	dephospho- kinase
gene922	FE46_RS04565	NZ_CP007627.1	1067150..1067593	844	62.9374	76.4587	2.46543	50S ribosomal L9
gene2135	FE46_RS10570	NZ_CP007627.1	complement(2399818..2400489)	41	2.02006	2.45404	2.45404	acylneuraminate cytidylyltransferase family
gene96	FE46_RS00485	NZ_CP007627.1	123718..124797	36	1.10364	1.34074	2.45375	DNA polymerase IV
gene1517	FE46_RS07495	NZ_CP007627.1	complement(1726635..1727702)	216	6.69626	8.13485	2.45375	chorismate synthase
gene1119	FE46_RS05545	NZ_CP007627.1	complement(1279311..1279622)	24	2.54687	3.09403	2.45375	four helix bundle
gene260	FE46_RS01290	NZ_CP007627.1	complement(304588..304914)	12	1.21502	1.47605	2.45375	nucleotide pyrophosphohydrolase
gene377	FE46_RS01865	NZ_CP007627.1	complement(447276..447632)	12	1.11292	1.35201	2.45375	arsenate reductase
gene1385	FE46_RS06850	NZ_CP007627.1	complement(1578361..1580838)	151	2.01755	2.451	2.451	PKD domain-containing
gene818	FE46_RS04050	NZ_CP007627.1	complement(946184..947134)	119	4.14301	5.03308	2.4333	GSCFA domain-containing
gene829	FE46_RS04110	NZ_CP007627.1	complement(959696..960673)	107	3.62238	4.4006	2.43103	M23 family metallopeptidase
gene1389	FE46_RS06870	NZ_CP007627.1	1584522..1586414	487	8.51781	10.3477	2.42881	U32 family peptidase
gene2311	FE46_RS11445	NZ_CP007627.1	complement(2582137..2582667)	95	5.9235	7.19609	2.42819	NAD(P)H-dependent oxidoreductase subunit E
gene1480	FE46_RS07310	NZ_CP007627.1	complement(1686679..1687320)	154	7.9421	9.64835	2.42229	rhomboid family intramembrane serine protease
gene1931	FE46_RS09555	NZ_CP007627.1	2160666..2161004	225	21.9752	26.6962	2.42146	hypothetical protein
gene2157	FE46_RS10680	NZ_CP007627.1	complement(2424587..2425237)	59	3.00069	3.64534	2.41285	Acetyltransferase
gene1617	FE46_RS07995	NZ_CP007627.1	1843951..1844604	118	5.97384	7.25724	2.41285	DEAD DEAH box helicase
gene665	FE46_RS03295	NZ_CP007627.1	complement(787407..789467)	59	0.947815	1.15144	2.41285	thioredoxin domain-containing
gene1902	FE46_RS09410	NZ_CP007627.1	2130765..2132954	106	1.60255	1.94683	2.40831	response regulator
gene172	FE46_RS00850	NZ_CP007627.1	complement(205510..208668)	189	1.9809	2.40646	2.40646	AAA family ATPase
gene210	FE46_RS01040	NZ_CP007627.1	251532..251957	823	63.9646	77.7065	2.40409	50S ribosomal protein L27
gene701	FE46_RS03475	NZ_CP007627.1	complement(824378..824995)	47	2.51802	3.05898	2.40263	family ribosome biogenesis GTP-binding
gene1874	FE46_RS09270	NZ_CP007627.1	complement(2107123..2107641)	31	1.97763	2.40249	2.40249	shikimate kinase
gene1767	FE46_RS08740	NZ_CP007627.1	complement(1998957..1999406)	70	5.15033	6.25681	2.38559	Transcription elongation family
gene518	FE46_RS02560	NZ_CP007627.1	complement(605794..606639)	50	1.95681	2.37721	2.37721	IS3 family transposase
gene772	FE46_RS03825	NZ_CP007627.1	893492..895339	109	1.95287	2.37242	2.37242	asparagine synthase (glutamine-hydrolyzing)
gene746	FE46_RS03695	NZ_CP007627.1	867373..868230	81	3.1257	3.79721	2.36611	peptide chain release factor N(5)-glutamine methyltransferase
gene895	FE46_RS04430	NZ_CP007627.1	complement(1041252..1041506)	15	1.9476	2.36602	2.36602	hypothetical protein
gene954	FE46_RS04720	NZ_CP007627.1	1095504..1096976	1999	44.9324	54.5855	2.36274	IMP dehydrogenase
gene501	FE46_RS02475	NZ_CP007627.1	586539..587780	623	16.608	20.1759	2.35908	transcription termination antitermination
gene2418	FE46_RS11980	NZ_CP007627.1	complement(2710255..2710527)	16	1.94047	2.35735	2.35735	hypothetical protein
gene1738	FE46_RS08600	NZ_CP007627.1	1967358..1967897	23	1.41021	1.71317	2.35151	Uncharacterised family (UPF0227)
gene148	FE46_RS00730	NZ_CP007627.1	176007..176588	34	1.93422	2.34976	2.34976	PhnA protein
gene1688	FE46_RS08350	NZ_CP007627.1	complement(1916693..1917658)	458	15.6978	19.0702	2.34128	prolipo diacylglyceryl transferase
gene1014	FE46_RS05020	NZ_CP007627.1	1167262..1168875	377	7.7337	9.39518	2.33602	alkaline phosphatase family
gene2307	FE46_RS11425	NZ_CP007627.1	complement(2577665..2578696)	137	4.39532	5.33959	2.33447	NADH-quinone oxidoreductase subunit
gene1591	FE46_RS07865	NZ_CP007627.1	complement(1809495..1810322)	387	15.475	18.7996	2.32745	DUF4249 domain-containing
gene289	FE46_RS01420	NZ_CP007627.1	complement(334868..336118)	1068	28.266	34.3385	2.29877	methionine adenosyltransferase
gene1463	FE46_RS07225	NZ_CP007627.1	complement(1660689..1665031)	638	4.86385	5.90878	2.28873	family heavy metal efflux RND transporter
gene125	FE46_RS12870	NZ_CP007627.1	156115..157089	11400	387.124	470.292	2.28311	T9SS type A sorting domain-containing protein
gene284	FE46_RS01395	NZ_CP007627.1	complement(328397..329242)	48	1.87854	2.28212	2.28212	IS3 family transposase
gene2505	FE46_RS12405	NZ_CP007627.1	2806358..2807599	212	5.6515	6.86565	2.28155	GTPase
gene1316	FE46_RS06505	NZ_CP007627.1	complement(1498448..1499047)	34	1.87619	2.27927	2.27927	bifunctional phosphoribosyl-AMP cyclohydrolase phosphoribosyl-ATP diphosphatase
gene94	FE46_RS00475	NZ_CP007627.1	122203..122577	89	7.85793	9.5461	2.27483	four helix bundle protein
gene2287	FE46_RS11330	NZ_CP007627.1	complement(2556435..2557343)	278	10.1258	12.3012	2.2738	phosphate ABC transporter substrate-binding
gene2363	FE46_RS11705	NZ_CP007627.1	complement(2647582..2648485)	51	1.86789	2.26918	2.26918	Dialkylrecorsinol condensing enzyme
gene1697	FE46_RS08395	NZ_CP007627.1	complement(1927248..1928549)	520	13.2234	16.0642	2.26232	diapophytoene dehydrogenase
gene2316	FE46_RS11470	NZ_CP007627.1	2586411..2592083	319	1.86178	2.26175	2.26175	membrane
gene878	FE46_RS04355	NZ_CP007627.1	1022487..1023053	254	14.832	18.0185	2.25816	gliding motility-associated peptidyl-prolyl isomerase
gene2166	FE46_RS10725	NZ_CP007627.1	complement(2432374..2432784)	23	1.85283	2.25089	2.25089	sugar epimerase
gene650	FE46_RS03220	NZ_CP007627.1	773294..774037	44	1.95808	2.37874	2.24927	deoxyribose-phosphate aldolase
gene36	FE46_RS00185	NZ_CP007627.1	complement(57785..58687)	44	1.6133	1.95989	2.24927	oxygen-dependent coproporphyrinogen oxidase
gene541	FE46_RS02675	NZ_CP007627.1	633692..634690	33	1.0937	1.32867	2.24927	virulence family
gene1800	FE46_RS08905	NZ_CP007627.1	2036111..2036752	33	1.70188	2.0675	2.24927	Hypothetical transmembrane
gene964	FE46_RS04770	NZ_CP007627.1	1104696..1106009	66	1.66302	2.0203	2.24927	family
gene1725	FE46_RS08535	NZ_CP007627.1	1956740..1957312	32	1.84903	2.24627	2.24627	hypothetical protein
gene1183	FE46_RS05865	NZ_CP007627.1	1349219..1351681	197	2.6482	3.21713	2.23791	DNA translocase
gene1730	FE46_RS08560	NZ_CP007627.1	1960975..1962609	186	3.76656	4.57575	2.23724	ABC-F family ATP-binding cassette domain-containing
gene73	FE46_RS00370	NZ_CP007627.1	complement(94190..95461)	513	13.353	16.2217	2.23187	serine--tRNA ligase
gene2444	FE46_RS12100	NZ_CP007627.1	complement(2735517..2736071)	120	7.15876	8.69672	2.23068	DNA-3-methyladenine glycosylase I
gene1545	FE46_RS07635	NZ_CP007627.1	1760359..1760985	240	12.6734	15.3961	2.23068	Restriction endonuclease
gene2310	FE46_RS11440	NZ_CP007627.1	complement(2580768..2582135)	229	5.54241	6.73313	2.22979	NADH-quinone oxidoreductase subunit
gene1625	FE46_RS08035	NZ_CP007627.1	1850453..1851514	98	3.05528	3.71167	2.22655	isochorismate synthase
gene684	FE46_RS03390	NZ_CP007627.1	807533..808765	261	7.00853	8.51422	2.22371	ATP-dependent Clp protease ATP-binding subunit
gene1498	FE46_RS07400	NZ_CP007627.1	complement(1710109..1711266)	54	1.54396	1.87565	2.20837	peptidase M14
gene897	FE46_RS04440	NZ_CP007627.1	1042200..1042877	452	22.0728	26.8149	2.20058	tRNA (guanosine(37)-N1)-methyltransferase
gene112	FE46_RS00565	NZ_CP007627.1	complement(141005..141355)	129	12.1684	14.7826	2.19815	aspartate 1-decarboxylase
gene1879	FE46_RS09295	NZ_CP007627.1	2109600..2110499	43	1.58189	1.92173	2.19815	family transcriptional regulator
gene637	FE46_RS03155	NZ_CP007627.1	complement(752197..752904)	43	2.01087	2.44288	2.19815	dipeptidase
gene200	FE46_RS00990	NZ_CP007627.1	239016..239786	42	1.80362	2.1911	2.1911	enoyl-CoA hydratase/isomerase family protein
gene441	FE46_RS02180	NZ_CP007627.1	complement(521238..521615)	32	2.8029	3.40507	2.18111	helix-turn-helix transcriptional regulator
gene2423	FE46_RS12005	NZ_CP007627.1	complement(2716421..2716879)	192	13.8496	16.825	2.18111	Thioredoxin family
gene1814	FE46_RS08980	NZ_CP007627.1	complement(2046881..2048089)	32	0.876341	1.06461	2.18111	penicillin-binding
gene2255	FE46_RS11170	NZ_CP007627.1	2516693..2517541	96	3.7438	4.54811	2.18111	glycosyltransferase family 2
gene1795	FE46_RS08880	NZ_CP007627.1	2031623..2032672	117	3.68932	4.48192	2.17491	o-succinylbenzoate synthase
gene2513	FE46_RS12445	NZ_CP007627.1	complement(2816376..2817185)	85	3.47443	4.22086	2.17259	DNA RNA non-specific endonuclease
gene657	FE46_RS03255	NZ_CP007627.1	complement(781683..782366)	223	10.7944	13.1134	2.17137	SCO family
gene14	FE46_RS12855	NZ_CP007627.1	21026..23590	775	10.0038	12.1529	2.17084	type IX secretion system membrane protein PorP/SprF
gene1820	FE46_RS09010	NZ_CP007627.1	complement(2053949..2055745)	2332	42.9665	52.1973	2.16748	translational GTPase
gene330	FE46_RS01630	NZ_CP007627.1	387386..388978	53	1.10156	1.33822	2.16748	alpha-amylase
gene2262	FE46_RS11205	NZ_CP007627.1	complement(2523058..2524686)	748	15.203	18.4692	2.15423	Pyruvate dehydrogenase E2 component (dihydrolipoamide acetyltransferase)
gene781	FE46_RS03870	NZ_CP007627.1	complement(901803..904655)	1219	14.1466	17.1858	2.14879	carbamoyl-phosphate synthase large subunit
gene1556	FE46_RS07690	NZ_CP007627.1	1769516..1769896	21	1.82492	2.21698	2.14703	PH domain-containing
gene2229	FE46_RS11040	NZ_CP007627.1	complement(2489315..2490001)	42	2.02415	2.45901	2.14703	noncanonical pyrimidine family
gene2529	FE46_RS12525	NZ_CP007627.1	complement(2832500..2833600)	42	1.26302	1.53437	2.14703	DNA-protecting
gene622	FE46_RS03080	NZ_CP007627.1	complement(733402..734637)	315	8.43804	10.2508	2.14703	tetracycline resistance MFS efflux pump
gene1844	FE46_RS09120	NZ_CP007627.1	complement(2080861..2082282)	1570	36.5552	44.4086	2.14021	MBOAT family
gene1189	FE46_RS05895	NZ_CP007627.1	1356706..1357296	387	21.6807	26.3385	2.13874	family transcriptional regulator
gene1503	FE46_RS07425	NZ_CP007627.1	complement(1713892..1715394)	261	5.74951	6.98472	2.13476	histidine ammonia-lyase
gene1274	FE46_RS06300	NZ_CP007627.1	complement(1452316..1454175)	313	5.57161	6.7686	2.1334	peptidase M61
gene1685	FE46_RS08335	NZ_CP007627.1	complement(1913495..1915426)	2283	39.1245	47.5298	2.13162	ATP-dependent metallopeptidase Yme1 Tma family
gene2155	FE46_RS10670	NZ_CP007627.1	complement(2421213..2423180)	333	5.60233	6.80591	2.12786	polysaccharide biosynthesis
gene1884	FE46_RS09320	NZ_CP007627.1	complement(2114214..2114741)	1398	87.6643	106.498	2.11749	DUF4252 domain-containing
gene304	FE46_RS12930	NZ_CP007627.1	353972..354199	12	1.74259	2.11697	2.11697	T9SS type A sorting domain-containing protein
gene1459	FE46_RS07205	NZ_CP007627.1	complement(1654660..1656087)	75	1.73893	2.11252	2.11252	L-serine ammonia-lyase
gene795	FE46_RS03935	NZ_CP007627.1	916599..919115	196	2.57824	3.13213	2.10936	type I DNA topoisomerase
gene2000	FE46_RS09900	NZ_CP007627.1	2245903..2247276	72	1.73498	2.10772	2.10772	methylmalonyl- mutase
gene305	FE46_RS01495	NZ_CP007627.1	complement(354295..355188)	226	8.36991	10.1681	2.10056	IS982 family transposase
gene820	FE46_RS04060	NZ_CP007627.1	948129..949883	82	1.54699	1.87933	2.09591	ABC transporter ATP-binding
gene1031	FE46_RS05105	NZ_CP007627.1	complement(1184319..1184507)	41	7.18243	8.72548	2.09591	Hypothetical protein FPSM_01062
gene660	FE46_RS03270	NZ_CP007627.1	complement(783609..784616)	1593	52.3245	63.5657	2.08804	cytochrome oxidase subunit III
gene971	FE46_RS04805	NZ_CP007627.1	1113894..1115153	1938	50.9252	61.8658	2.08568	aminotransferase class I II-fold pyridoxal phosphate-dependent enzyme
gene738	FE46_RS03655	NZ_CP007627.1	861095..861385	506	57.5715	69.9399	2.06933	hypothetical protein
gene495	FE46_RS02445	NZ_CP007627.1	complement(581580..583154)	645	13.559	16.472	2.06076	S41 family peptidase
gene1127	FE46_RS05585	NZ_CP007627.1	1286660..1286965	151	16.3382	19.8483	2.05842	2TM domain-containing
gene692	FE46_RS03430	NZ_CP007627.1	814466..815143	20	0.976675	1.1865	2.04479	hypothetical protein
gene2581	FE46_RS12780	NZ_CP007627.1	complement(2887285..2888184)	60	2.20728	2.68149	2.04479	cation transporter
gene1342	FE46_RS06635	NZ_CP007627.1	1526889..1527599	36	1.67642	2.03657	2.03657	two pore domain potassium channel family
gene448	FE46_RS02210	NZ_CP007627.1	complement(527803..529056)	69	1.8218	2.21319	2.01558	DUF5103 domain-containing
gene1339	FE46_RS06620	NZ_CP007627.1	complement(1522982..1524370)	157	3.74237	4.54637	2.00645	bifunctional UDP-3-O-[3-hydroxymyristoyl] N-acetylglucosamine deacetylase 3-hydroxyacyl-ACP dehydratase
gene677	FE46_RS03355	NZ_CP007627.1	801493..802221	392	17.8036	21.6285	2.00389	pyridoxine 5 -phosphate synthase
gene546	FE46_RS02700	NZ_CP007627.1	642109..642954	42	1.64372	1.99685	1.99685	IS3 family transposase
gene2151	FE46_RS10650	NZ_CP007627.1	2416078..2416776	39	1.8473	2.24416	1.99367	family
gene1372	FE46_RS06785	NZ_CP007627.1	complement(1564141..1564986)	2209	86.452	105.025	1.98984	DUF2911 domain-containing
gene26	FE46_RS00135	NZ_CP007627.1	46784..49819	107	1.16689	1.41759	1.98902	N-6 DNA methylase
gene760	FE46_RS03765	NZ_CP007627.1	884393..885343	126	4.38672	5.32914	1.98187	methionyl-tRNA formyltransferase
gene2178	FE46_RS10785	NZ_CP007627.1	complement(2446913..2447701)	242	10.1552	12.3369	1.97936	sugar transporter
gene857	FE46_RS04250	NZ_CP007627.1	complement(996466..997125)	29	1.4548	1.76735	1.97663	family pyridoxal phosphate-dependent enzyme
gene2033	FE46_RS10060	NZ_CP007627.1	2283922..2284119	58	9.69868	11.7823	1.97663	cbb3-type cytochrome oxidase assembly
gene2078	FE46_RS10285	NZ_CP007627.1	2341524..2342183	29	1.4548	1.76735	1.97663	ribonuclease HII
gene2358	FE46_RS11680	NZ_CP007627.1	complement(2644112..2645110)	29	0.96113	1.16762	1.97663	DUF4872 domain-containing
gene2543	FE46_RS12595	NZ_CP007627.1	complement(2846306..2847781)	106	2.37777	2.8886	1.97043	polysaccharide biosynthesis
gene483	FE46_RS02385	NZ_CP007627.1	569729..570931	77	2.11921	2.5745	1.96811	IS256 family transposase
gene1371	FE46_RS06780	NZ_CP007627.1	1561977..1564082	231	3.63164	4.41185	1.96811	ATP-dependent DNA helicase
gene793	FE46_RS03925	NZ_CP007627.1	complement(914644..915222)	48	2.74481	3.33449	1.963	chalcone isomerase
gene592	FE46_RS02930	NZ_CP007627.1	complement(692723..694504)	163	3.02851	3.67915	1.96059	sporadically distributed TIGR04141 family
gene584	FE46_RS02890	NZ_CP007627.1	complement(686140..686385)	67	9.01757	10.9549	1.95715	hypothetical protein
gene656	FE46_RS03250	NZ_CP007627.1	complement(781054..781596)	114	6.95112	8.44447	1.94255	DUF420 domain-containing
gene1154	FE46_RS05720	NZ_CP007627.1	complement(1315019..1315588)	19	1.10364	1.34074	1.94255	hypothetical protein
gene199	FE46_RS00985	NZ_CP007627.1	238201..238950	418	18.4529	22.4172	1.94255	Uroporphyrinogen-III synthase
gene1378	FE46_RS06815	NZ_CP007627.1	1568925..1571537	76	0.962995	1.16988	1.94255	PAS domain S-box
gene1722	FE46_RS08520	NZ_CP007627.1	complement(1954251..1955123)	19	0.720591	0.8754	1.94255	N/A
gene2415	FE46_RS11965	NZ_CP007627.1	complement(2707047..2708318)	61	1.58779	1.9289	1.9289	adenosylmethionine--8-amino-7-oxononanoate transaminase
gene1739	FE46_RS08605	NZ_CP007627.1	1967894..1968331	21	1.58743	1.92847	1.92847	hypothetical protein
gene1077	FE46_RS05335	NZ_CP007627.1	1240543..1240977	1380	105.036	127.602	1.9196	DUF1573 domain-containing
gene2460	FE46_RS12180	NZ_CP007627.1	complement(2750795..2752993)	234	3.52322	4.28014	1.91392	N/A
gene609	FE46_RS03010	NZ_CP007627.1	713076..713300	187	27.5175	33.4292	1.91188	hypothetical protein
gene2103	FE46_RS10410	NZ_CP007627.1	2367680..2368816	28	0.815356	0.990524	1.90847	N/A
gene477	FE46_RS02355	NZ_CP007627.1	complement(561908..562954)	28	0.885444	1.07567	1.90847	ketol-acid reductoisomerase
gene1195	FE46_RS05925	NZ_CP007627.1	1361158..1362048	42	1.56071	1.896	1.896	ATP GTP-binding
gene2028	FE46_RS10035	NZ_CP007627.1	2278071..2278961	139	5.1652	6.27487	1.89484	rhomboid family intramembrane serine protease
secA	secA	NZ_CP007627.1	1936069..1939419	2334	23.0609	28.0152	1.89386	N/A
gene1486	FE46_RS07340	NZ_CP007627.1	complement(1692883..1693920)	37	1.1802	1.43374	1.89143	HAMP domain-containing histidine kinase
gene715	FE46_RS03545	NZ_CP007627.1	839904..841889	415	6.9186	8.40497	1.88575	cell division
gene2276	FE46_RS11275	NZ_CP007627.1	2543755..2545017	83	2.17583	2.64327	1.88575	DUF1343 domain-containing
gene1539	FE46_RS07605	NZ_CP007627.1	complement(1755612..1756844)	46	1.23522	1.50059	1.88121	Glycosyl group 1 family
gene443	FE46_RS02185	NZ_CP007627.1	522277..523497	57	1.54564	1.8777	1.8777	hypothetical protein
gene1737	FE46_RS08595	NZ_CP007627.1	1966288..1967358	55	1.70029	2.06557	1.87439	DNA-binding domain-containing
gene559	FE46_RS02765	NZ_CP007627.1	complement(654636..656573)	55	0.939634	1.1415	1.87439	ATP-dependent helicase
gene667	FE46_RS03305	NZ_CP007627.1	791010..792008	467	15.4775	18.8026	1.87238	type IX secretion system membrane
gene2435	FE46_RS12055	NZ_CP007627.1	complement(2727475..2729112)	76	1.53621	1.86624	1.86624	S41 family peptidase
gene1490	FE46_RS07360	NZ_CP007627.1	complement(1697301..1699523)	103	1.53408	1.86365	1.86365	N/A
gene864	FE46_RS04285	NZ_CP007627.1	1004275..1005753	82	1.83567	2.23004	1.86303	MBOAT family
gene1331	FE46_RS06580	NZ_CP007627.1	complement(1514239..1515129)	91	3.38153	4.10801	1.86076	exopolyphosphatase
gene652	FE46_RS03230	NZ_CP007627.1	complement(776493..777830)	664	16.4309	19.9609	1.85992	efflux RND transporter periplasmic adaptor subunit
gene2516	FE46_RS12460	NZ_CP007627.1	complement(2818485..2819600)	4232	125.554	152.528	1.85698	lipo
gene1004	FE46_RS04970	NZ_CP007627.1	1151275..1152471	55	1.52131	1.84814	1.84814	aspartate aminotransferase family
gene391	FE46_RS01935	NZ_CP007627.1	complement(462667..463713)	36	1.13843	1.383	1.84031	glycosyltransferase
gene1408	FE46_RS06965	NZ_CP007627.1	1606476..1606670	9	1.52812	1.85642	1.84031	hypothetical protein
gene2159	FE46_RS10690	NZ_CP007627.1	complement(2425978..2427030)	90	2.82985	3.43781	1.84031	ketoacyl-ACP synthase III
gene2452	FE46_RS12140	NZ_CP007627.1	2741114..2741845	27	1.22124	1.48361	1.84031	phosphatase PAP2 family
gene168	FE46_RS00830	NZ_CP007627.1	199133..199918	27	1.13734	1.38168	1.84031	alpha/beta hydrolase
gene1448	FE46_RS07150	NZ_CP007627.1	1642029..1642577	359	21.6507	26.302	1.8352	translation initiation factor IF-3
gene449	FE46_RS02215	NZ_CP007627.1	complement(529113..529889)	35	1.49141	1.81182	1.81182	SAM-dependent methyltransferase
gene2589	FE46_RS12820	NZ_CP007627.1	2894080..2896167	1450	22.9926	27.9322	1.80789	glutamine--tRNA ligase domain fusion
gene529	FE46_RS02615	NZ_CP007627.1	617385..618587	54	1.4862	1.80549	1.80549	IS256 family transposase
gene1469	FE46_RS07255	NZ_CP007627.1	1670245..1671282	123	3.92335	4.76623	1.79649	peptide chain release factor 2
gene2332	FE46_RS11550	NZ_CP007627.1	complement(2614604..2616070)	201	4.53644	5.51104	1.78697	RNA polymerase factor sigma-54
gene1769	FE46_RS08750	NZ_CP007627.1	2000751..2001161	61	4.91403	5.96974	1.78189	hypothetical protein
gene1726	FE46_RS08540	NZ_CP007627.1	1957797..1958249	20	1.46178	1.77582	1.77582	aldolase
gene1881	FE46_RS09305	NZ_CP007627.1	2112013..2112852	285	11.2335	13.6469	1.76595	phytoene squalene synthase family
gene1087	FE46_RS05385	NZ_CP007627.1	1250278..1251354	47	1.44488	1.75529	1.75529	porin
gene11	FE46_RS00060	NZ_CP007627.1	17694..18131	2942	222.392	270.169	1.75387	Gliding motility protein RemF
gene1067	FE46_RS05285	NZ_CP007627.1	complement(1226816..1227883)	60	1.86007	2.25968	1.75268	3-dehydroquinate synthase
gene1703	FE46_RS08425	NZ_CP007627.1	1933316..1934092	128	5.45429	6.62607	1.74489	class I SAM-dependent methyltransferase
gene907	FE46_RS04490	NZ_CP007627.1	1054404..1055501	102	3.07572	3.7365	1.73807	glycosyltransferase
gene1027	FE46_RS05085	NZ_CP007627.1	1181160..1181759	68	3.75238	4.55853	1.73807	DUF1684 domain-containing
gene1938	FE46_RS09590	NZ_CP007627.1	complement(2173669..2174046)	17	1.48904	1.80894	1.73807	hypothetical protein
gene598	FE46_RS13160	NZ_CP007627.1	complement(699637..700533)	102	3.76493	4.57378	1.73807	type II restriction endonuclease
gene2245	FE46_RS11120	NZ_CP007627.1	2505943..2506581	17	0.880841	1.07008	1.73807	hypothetical protein
gene215	FE46_RS01065	NZ_CP007627.1	complement(256354..256833)	17	1.17262	1.42454	1.73807	ribonuclease HI
gene358	FE46_RS01770	NZ_CP007627.1	complement(424100..424720)	17	0.906373	1.10109	1.73807	bifunctional nuclease family
gene2328	FE46_RS11535	NZ_CP007627.1	complement(2610758..2611504)	34	1.50698	1.83074	1.73807	1-acyl-sn-glycerol-3-phosphate acyltransferase
gene2573	FE46_RS12740	NZ_CP007627.1	complement(2879052..2879603)	17	1.01967	1.23873	1.73807	dTDP-4-dehydrorhamnose 3,5-epimerase
gene2055	FE46_RS10170	NZ_CP007627.1	complement(2321294..2321662)	3412	306.149	371.92	1.73553	50S ribosomal L7 L12
gene2205	FE46_RS10920	NZ_CP007627.1	complement(2468611..2469162)	957	57.4014	69.7333	1.73174	50S ribosomal L5
gene309	FE46_RS01520	NZ_CP007627.1	complement(359626..361944)	110	1.57051	1.90792	1.73021	T9SS type A sorting domain-containing protein
gene2437	FE46_RS12065	NZ_CP007627.1	complement(2729580..2730323)	32	1.42405	1.72999	1.72999	monofunctional biosynthetic peptidoglycan transglycosylase
gene169	FE46_RS00835	NZ_CP007627.1	complement(199915..202683)	119	1.4229	1.72859	1.72859	PD-(D/E)XK nuclease family protein
gene47	FE46_RS00240	NZ_CP007627.1	67328..68803	76	1.70481	2.07107	1.72671	Two-component system sensor histidine kinase
gene843	FE46_RS04180	NZ_CP007627.1	complement(977551..978690)	1197	34.7647	42.2335	1.72367	acyl- dehydrogenase
gene1454	FE46_RS07180	NZ_CP007627.1	complement(1650132..1651460)	42	1.04634	1.27113	1.71762	aldehyde dehydrogenase
gene532	FE46_RS02630	NZ_CP007627.1	complement(620694..621539)	36	1.40891	1.71159	1.71159	IS3 family transposase
gene2465	FE46_RS12205	NZ_CP007627.1	2756636..2758261	1670	34.0052	41.3108	1.7074	phosphoenolpyruvate carboxykinase (ATP)
gene1923	FE46_RS09515	NZ_CP007627.1	2152434..2154869	50	0.679583	0.825582	1.70399	N/A
gene2090	FE46_RS10345	NZ_CP007627.1	complement(2353643..2354557)	25	0.904625	1.09897	1.70399	DUF2279 domain-containing
gene1317	FE46_RS06510	NZ_CP007627.1	complement(1499050..1499805)	25	1.09488	1.3301	1.70399	imidazole glycerol phosphate synthase subunit
gene2236	FE46_RS11075	NZ_CP007627.1	2497026..2497262	10	1.39702	1.69715	1.69715	hypothetical protein
gene42	FE46_RS00215	NZ_CP007627.1	complement(62397..63323)	33	1.17865	1.43186	1.68695	hydroxymethylbilane synthase
gene1494	FE46_RS07380	NZ_CP007627.1	1706168..1707889	41	0.788316	0.957675	1.67673	N/A
gene1887	FE46_RS09335	NZ_CP007627.1	complement(2115935..2116996)	139	4.33351	5.26451	1.67192	lipo
gene1397	FE46_RS06910	NZ_CP007627.1	1592958..1594082	49	1.44209	1.75191	1.66991	NAD-dependent epimerase dehydratase family
gene1193	FE46_RS05915	NZ_CP007627.1	1359630..1360160	22	1.37176	1.66646	1.66646	GNAT family N-acetyltransferase
gene475	FE46_RS02345	NZ_CP007627.1	complement(559208..560452)	146	3.88269	4.71684	1.65855	MFS transporter
gene2069	FE46_RS10240	NZ_CP007627.1	complement(2327852..2329021)	1102	31.185	37.8846	1.65688	acyl- dehydrogenase
gene855	FE46_RS04240	NZ_CP007627.1	complement(994591..995952)	89	2.16353	2.62833	1.65442	exonuclease
gene55	FE46_RS12865	NZ_CP007627.1	complement(74102..75466)	121	2.93496	3.5655	1.64946	ATP-binding protein
gene1654	FE46_RS08180	NZ_CP007627.1	1878587..1879975	387	9.22483	11.2067	1.64861	tRNA modification GTPase
gene1129	FE46_RS05595	NZ_CP007627.1	1287393..1288154	129	5.60511	6.80929	1.64861	response regulator transcription factor
gene2576	FE46_RS12755	NZ_CP007627.1	complement(2882214..2883704)	61	1.35457	1.64558	1.64558	GH3 auxin-responsive promoter family
gene2436	FE46_RS12060	NZ_CP007627.1	complement(2729178..2729576)	8	0.663845	0.806463	1.63583	N/A
gene1353	FE46_RS06690	NZ_CP007627.1	complement(1541525..1542085)	32	1.88859	2.29432	1.63583	Hypothetical protein FPSM_01391
gene1558	FE46_RS07700	NZ_CP007627.1	1770852..1771079	8	1.16173	1.41131	1.63583	membrane
gene60	FE46_RS00305	NZ_CP007627.1	80280..80639	24	2.20728	2.68149	1.63583	YraN family protein
gene1095	FE46_RS05425	NZ_CP007627.1	complement(1257657..1257836)	24	4.41457	5.36298	1.63583	sterol desaturase family
gene1522	FE46_RS07520	NZ_CP007627.1	complement(1732146..1732661)	24	1.53997	1.87081	1.63583	lipocalin-like domain-containing
gene1304	FE46_RS06445	NZ_CP007627.1	complement(1484425..1485684)	51	1.34014	1.62805	1.62805	sugar isomerase
gene2376	FE46_RS11770	NZ_CP007627.1	2661166..2662425	51	1.34014	1.62805	1.62805	site-specific integrase
gene1560	FE46_RS07710	NZ_CP007627.1	1771740..1772600	269	10.3442	12.5666	1.61779	family
gene2059	FE46_RS10190	NZ_CP007627.1	complement(2323419..2323970)	419	25.1319	30.5311	1.61654	transcription termination antitermination factor
gene1787	FE46_RS08840	NZ_CP007627.1	2021894..2022517	166	8.80792	10.7002	1.61636	family transcriptional regulator
gene1924	FE46_RS09520	NZ_CP007627.1	complement(2154866..2155252)	71	6.07431	7.37929	1.61311	acyl- thioesterase
gene208	FE46_RS01030	NZ_CP007627.1	246750..247700	213	7.41564	9.00879	1.61311	L-threonine 3-dehydrogenase
gene1225	FE46_RS06075	NZ_CP007627.1	complement(1394400..1394624)	9	1.32437	1.60889	1.60889	hypothetical protein
gene139	FE46_RS13110	NZ_CP007627.1	complement(170396..170582)	55	9.73802	11.8301	1.60662	hypothetical protein, partial
gene1573	FE46_RS07775	NZ_CP007627.1	complement(1790610..1791104)	55	3.67881	4.46915	1.60662	metallophosphoesterase family
gene1906	FE46_RS09430	NZ_CP007627.1	complement(2135519..2136403)	55	2.05764	2.49969	1.60662	bifunctional 5,10-methylene-tetrahydrofolate dehydrogenase 5,10-methylene-tetrahydrofolate cyclohydrolase
gene1702	FE46_RS08420	NZ_CP007627.1	1932870..1933217	102	9.70444	11.7893	1.60437	helix-turn-helix transcriptional regulator
gene1403	FE46_RS06940	NZ_CP007627.1	1599785..1602205	502	6.86529	8.3402	1.60388	phenylalanine--tRNA ligase subunit beta
gene1991	FE46_RS09855	NZ_CP007627.1	complement(2232590..2233462)	47	1.78252	2.16546	1.60175	cyanophycinase
gene53	FE46_RS00270	NZ_CP007627.1	complement(72730..73419)	219	10.5086	12.7662	1.59932	HAD family hydrolase
gene1227	FE46_RS06085	NZ_CP007627.1	complement(1395032..1395787)	30	1.31386	1.59612	1.59612	hypothetical protein
gene794	FE46_RS03930	NZ_CP007627.1	complement(915266..916078)	117	4.7648	5.78845	1.59494	DUF2490 domain-containing
gene973	FE46_RS04815	NZ_CP007627.1	complement(1116594..1117664)	39	1.20566	1.46468	1.59494	transporter
gene1379	FE46_RS06820	NZ_CP007627.1	1571540..1572676	45	1.31039	1.59191	1.59191	histidine kinase
gene2030	FE46_RS10045	NZ_CP007627.1	2280369..2280647	163	19.3434	23.4991	1.58715	DUF2805 domain-containing
gene2572	FE46_RS12735	NZ_CP007627.1	complement(2878204..2879058)	62	2.40091	2.91671	1.58471	dTDP-4-dehydrorhamnose reductase
gene1115	FE46_RS05525	NZ_CP007627.1	complement(1273908..1276181)	209	3.04302	3.69678	1.58282	T9SS type B sorting domain-containing
gene676	FE46_RS03350	NZ_CP007627.1	complement(800522..801181)	54	2.70894	3.29092	1.57741	CBS domain-containing
gene497	FE46_RS02455	NZ_CP007627.1	complement(583837..584430)	655	36.5094	44.3529	1.57569	family
gene945	FE46_RS04675	NZ_CP007627.1	1088821..1089522	1176	55.4651	67.381	1.57168	response regulator transcription factor
gene1196	FE46_RS05930	NZ_CP007627.1	1362052..1362870	32	1.29365	1.57157	1.57157	3-methyl-2-oxobutanoate hydroxymethyltransferase
gene1134	FE46_RS05620	NZ_CP007627.1	complement(1292285..1293388)	46	1.37955	1.67593	1.56767	Glycosyl group 2 family
gene222	FE46_RS01100	NZ_CP007627.1	260763..262193	1377	31.8599	38.7045	1.56426	pyruvate kinase
gene1834	FE46_RS09075	NZ_CP007627.1	complement(2069869..2070252)	282	24.3146	29.5383	1.55846	DUF1573 domain-containing
gene2585	FE46_RS12800	NZ_CP007627.1	2891932..2892603	198	9.75541	11.8512	1.55719	DUF2807 domain-containing
gene722	FE46_RS03580	NZ_CP007627.1	complement(846461..848596)	1718	26.63	32.3511	1.5544	polyribonucleotide nucleotidyltransferase
gene301	FE46_RS01480	NZ_CP007627.1	347743..349515	493	9.20636	11.1842	1.55089	1-deoxy-D-xylulose-5-phosphate synthase
gene714	FE46_RS03540	NZ_CP007627.1	838457..839857	121	2.85954	3.47388	1.54637	cell division
gene1532	FE46_RS07570	NZ_CP007627.1	1745086..1745466	68	5.90927	7.17879	1.54495	family
gene2158	FE46_RS10685	NZ_CP007627.1	complement(2425215..2425943)	68	3.08838	3.75188	1.54495	SDR family oxidoreductase
gene1861	FE46_RS09205	NZ_CP007627.1	complement(2098259..2099212)	219	7.60056	9.23343	1.54417	signal recognition particle-docking
gene1282	FE46_RS06335	NZ_CP007627.1	complement(1458360..1458620)	10	1.26855	1.54109	1.54109	Hypothetical transmembrane
gene1849	FE46_RS09145	NZ_CP007627.1	complement(2085074..2088199)	1479	15.6649	19.0303	1.53515	cytochrome C biogenesis
gene2357	FE46_RS11675	NZ_CP007627.1	complement(2642772..2644049)	30	0.777213	0.944186	1.53359	N/A
gene271	FE46_RS01330	NZ_CP007627.1	complement(314851..315687)	15	0.593356	0.72083	1.53359	N/A
gene1961	FE46_RS09705	NZ_CP007627.1	complement(2201644..2202459)	30	1.21725	1.47876	1.53359	SDR family NAD(P)-dependent oxidoreductase
gene1368	FE46_RS06765	NZ_CP007627.1	1558618..1558856	45	6.23396	7.57324	1.53359	hexameric tyrosine-coordinated heme (HTHP)
gene2108	FE46_RS10435	NZ_CP007627.1	complement(2372272..2372538)	15	1.86007	2.25968	1.53359	plasmid stabilization
gene2364	FE46_RS11710	NZ_CP007627.1	complement(2648496..2650151)	30	0.599806	0.728666	1.53359	N/A
gene1606	FE46_RS07940	NZ_CP007627.1	complement(1832898..1833638)	517	23.1005	28.0634	1.53211	DUF2807 domain-containing
gene1472	FE46_RS07270	NZ_CP007627.1	complement(1673330..1675390)	254	4.08042	4.95705	1.52758	S9 family peptidase
gene2020	FE46_RS10000	NZ_CP007627.1	complement(2268579..2271035)	82	1.10499	1.34238	1.5243	N/A
gene1959	FE46_RS09695	NZ_CP007627.1	2199200..2200288	311	9.45545	11.4868	1.51412	M42 family metallopeptidase
gene2116	FE46_RS10475	NZ_CP007627.1	complement(2379633..2380448)	37	1.50128	1.82381	1.51314	glycoside hydrolase family 25
gene138	FE46_RS13105	NZ_CP007627.1	complement(170201..170387)	59	10.4462	12.6905	1.50803	N/A
gene2266	FE46_RS11225	NZ_CP007627.1	complement(2527622..2531458)	1347	11.6232	14.1203	1.5051	type IX secretion system sortase
gene2429	FE46_RS12035	NZ_CP007627.1	2724252..2725163	34	1.23434	1.49952	1.49952	GHMP kinase
gene779	FE46_RS03860	NZ_CP007627.1	900230..900775	22	1.33407	1.62068	1.49951	acyl- thioesterase
gene2264	FE46_RS11215	NZ_CP007627.1	complement(2525830..2526312)	18	1.23389	1.49897	1.49897	cytidine deaminase
gene52	FE46_RS00265	NZ_CP007627.1	complement(72157..72567)	1392	112.137	136.227	1.49808	BrxA/BrxB family bacilliredoxin
gene1060	FE46_RS05250	NZ_CP007627.1	1217682..1220132	669	9.03717	10.9787	1.48692	endopeptidase La
gene1686	FE46_RS08340	NZ_CP007627.1	complement(1915438..1915809)	596	53.046	64.4422	1.48621	ribosome silencing factor
gene2411	FE46_RS11945	NZ_CP007627.1	complement(2700885..2701349)	109	7.7611	9.42846	1.48588	IS982 family transposase
gene868	FE46_RS04305	NZ_CP007627.1	1008591..1009862	556	14.4723	17.5815	1.4765	adenylosuccinate synthase
gene265	FE46_RS01300	NZ_CP007627.1	complement(306728..307573)	31	1.21322	1.47387	1.47387	DNA damage-inducible protein D
gene151	FE46_RS00745	NZ_CP007627.1	complement(179167..179748)	36	2.048	2.48798	1.47225	nicotinate-nucleotide adenylyltransferase
gene974	FE46_RS04820	NZ_CP007627.1	1117771..1118028	338	43.3757	52.6944	1.47051	DUF4834 domain-containing
gene370	FE46_RS01830	NZ_CP007627.1	440825..441349	43	2.71181	3.2944	1.46543	16S rRNA processing
gene949	FE46_RS04695	NZ_CP007627.1	complement(1090797..1091981)	344	9.61147	11.6764	1.46543	Probable lipo precursor
gene1782	FE46_RS08815	NZ_CP007627.1	2016946..2017728	222	9.3873	11.404	1.46433	indole-3-glycerol phosphate synthase
gene2485	FE46_RS12305	NZ_CP007627.1	complement(2775986..2776315)	872	87.4887	106.284	1.46152	iron-sulfur cluster assembly accessory
gene1333	FE46_RS13020	NZ_CP007627.1	complement(1517818..1518204)	14	1.19775	1.45507	1.45507	Fic family
gene212	FE46_RS01050	NZ_CP007627.1	complement(252530..252997)	192	13.5833	16.5015	1.45407	CYTH domain-containing protein
gene948	FE46_RS04690	NZ_CP007627.1	1090255..1090479	78	11.4779	13.9437	1.44994	hypothetical protein
gene958	FE46_RS04740	NZ_CP007627.1	1100779..1101564	425	17.9026	21.7487	1.44839	sulfite exporter family
gene1168	FE46_RS05790	NZ_CP007627.1	complement(1333692..1335464)	176	3.28665	3.99274	1.43953	MFS transporter
gene824	FE46_RS04085	NZ_CP007627.1	complement(956713..957129)	21	1.66737	2.02559	1.43135	hypothetical protein
gene127	FE46_RS00635	NZ_CP007627.1	complement(158156..158566)	42	3.38343	4.11031	1.43135	phenylalanyl-tRNA synthetase subunit alpha
gene992	FE46_RS04910	NZ_CP007627.1	1134681..1135208	1596	100.08	121.581	1.43135	ferritin
gene231	FE46_RS01145	NZ_CP007627.1	268750..269256	28	1.82852	2.22135	1.43135	DUF456 domain-containing protein
gene733	FE46_RS03630	NZ_CP007627.1	857152..857691	35	2.14597	2.607	1.43135	exosortase family
gene2304	FE46_RS11410	NZ_CP007627.1	complement(2576271..2576591)	14	1.44402	1.75425	1.43135	NADH-quinone oxidoreductase subunit
gene1797	FE46_RS08890	NZ_CP007627.1	complement(2033564..2033929)	14	1.26647	1.53856	1.43135	hypothetical protein
gene342	FE46_RS01685	NZ_CP007627.1	398511..398708	7	1.17053	1.422	1.422	hypothetical protein
gene1790	FE46_RS08855	NZ_CP007627.1	2025132..2026718	507	10.5774	12.8499	1.42015	multidrug efflux MFS transporter
gene664	FE46_RS03290	NZ_CP007627.1	complement(787002..787355)	76	7.10821	8.6353	1.41276	domain-containing
gene1634	FE46_RS08080	NZ_CP007627.1	1856597..1857625	69	2.22016	2.69712	1.4109	M28 family peptidase
gene654	FE46_RS03240	NZ_CP007627.1	779427..780821	69	1.63766	1.98949	1.4109	DUF4403 family
gene1942	FE46_RS09610	NZ_CP007627.1	complement(2177217..2177912)	330	15.6984	19.0709	1.40579	family
gene1559	FE46_RS07705	NZ_CP007627.1	1771328..1771699	13	1.15704	1.40562	1.40562	DNA topoisomerase IV
gene1823	N/A	NZ_CP007627.1	complement(2056937..2059828)	932916	10680.6	12975.1	1.40527	N/A
gene1925	FE46_RS09525	NZ_CP007627.1	complement(2155257..2155745)	17	1.15104	1.39832	1.39832	PAS domain-containing
gene890	FE46_RS13195	NZ_CP007627.1	1035739..1035882	5	1.14963	1.39661	1.39661	hypothetical protein, partial
gene101	FE46_RS00510	NZ_CP007627.1	128628..129584	136	4.70518	5.71603	1.39046	hypothetical protein
gene354	FE46_RS01750	NZ_CP007627.1	complement(419359..422043)	170	2.0963	2.54667	1.39046	N/A
gene1221	FE46_RS06055	NZ_CP007627.1	1390689..1392077	48	1.14416	1.38997	1.38997	family transcriptional regulator
gene2258	FE46_RS11185	NZ_CP007627.1	complement(2519532..2520311)	61	2.58931	3.14559	1.38591	DUF4145 domain-containing
gene18	FE46_RS00095	NZ_CP007627.1	36119..38215	298	4.70509	5.71591	1.38488	LysM peptidoglycan-binding domain-containing protein
gene1865	FE46_RS09225	NZ_CP007627.1	complement(2100175..2101431)	88	2.31791	2.81588	1.38416	competence damage-inducible A
gene1319	FE46_RS06520	NZ_CP007627.1	complement(1500703..1501284)	20	1.13778	1.38221	1.38221	imidazole glycerol phosphate synthase subunit
gene2354	FE46_RS11660	NZ_CP007627.1	complement(2639681..2640946)	27	0.706122	0.857822	1.38023	N/A
gene2113	FE46_RS10460	NZ_CP007627.1	2377039..2377863	27	1.08358	1.31637	1.38023	twin-arginine translocase subunit
gene1078	FE46_RS05340	NZ_CP007627.1	complement(1240984..1241241)	108	13.8597	16.8373	1.38023	hypothetical protein
gene678	FE46_RS03360	NZ_CP007627.1	complement(802244..802879)	27	1.40558	1.70755	1.38023	ABC transporter ATP-binding
gene1321	FE46_RS06530	NZ_CP007627.1	complement(1502509..1503549)	47	1.49485	1.81599	1.37293	Histidinol-phosphate aminotransferase
gene732	FE46_RS03625	NZ_CP007627.1	complement(856623..857078)	1516	110.074	133.722	1.37164	GAF domain-containing
gene2456	FE46_RS12160	NZ_CP007627.1	2746504..2746980	60	4.16469	5.05941	1.36319	transcription elongation factor
gene2459	FE46_RS12175	NZ_CP007627.1	2749541..2750728	193	5.37886	6.53444	1.36084	aminopeptidase
gene1107	FE46_RS05485	NZ_CP007627.1	complement(1265481..1265720)	93	12.8298	15.5862	1.35832	family
gene1756	FE46_RS08685	NZ_CP007627.1	complement(1984451..1984723)	53	6.42781	7.80873	1.35467	N/A
gene2317	FE46_RS11475	NZ_CP007627.1	2592191..2594566	80	1.11479	1.35429	1.35429	penicillin-binding 1C
gene1471	FE46_RS07265	NZ_CP007627.1	complement(1672209..1673276)	635	19.6858	23.915	1.35254	cystathionine beta-synthase
gene2338	FE46_RS11580	NZ_CP007627.1	complement(2624633..2626150)	51	1.11237	1.35134	1.35134	NAD(P) FAD-dependent oxidoreductase
gene452	FE46_RS02230	NZ_CP007627.1	complement(532150..533508)	33	0.803978	0.976701	1.34956	N/A
gene1102	FE46_RS05460	NZ_CP007627.1	complement(1262314..1262514)	736	121.236	147.282	1.34372	heavy-metal-associated domain-containing
gene58	FE46_RS00295	NZ_CP007627.1	78178..79197	615	19.9629	24.2517	1.33781	Hypothetical transmembrane protein
gene1914	FE46_RS09470	NZ_CP007627.1	complement(2144513..2145865)	45	1.1012	1.33777	1.33777	DUF3570 domain-containing
gene34	FE46_RS00175	NZ_CP007627.1	complement(55746..56738)	33	1.10031	1.33669	1.33669	porphobilinogen synthase
gene530	FE46_RS02620	NZ_CP007627.1	complement(618833..619651)	13	0.525544	0.63845	1.32911	N/A
gene1293	FE46_RS06390	NZ_CP007627.1	1468436..1468810	13	1.14779	1.39437	1.32911	pre translocase subunit
gene2139	FE46_RS10590	NZ_CP007627.1	complement(2403501..2404403)	26	0.953312	1.15812	1.32911	glycosyltransferase family 2
gene2533	FE46_RS12545	NZ_CP007627.1	complement(2836825..2837598)	91	3.89269	4.72898	1.32911	DUF4292 domain-containing
gene1143	FE46_RS05665	NZ_CP007627.1	1301865..1302638	13	0.556099	0.675569	1.32911	N/A
gene1088	FE46_RS05390	NZ_CP007627.1	1251483..1252610	37	1.08603	1.31935	1.31935	histidine kinase
gene1843	FE46_RS09115	NZ_CP007627.1	complement(2079726..2080856)	129	3.77639	4.58769	1.31889	sugar O-acetyltransferase
gene946	FE46_RS04680	NZ_CP007627.1	1089585..1089971	186	15.913	19.3317	1.31149	bacillithiol system redox-active
gene1392	FE46_RS06885	NZ_CP007627.1	1589885..1590283	13	1.07875	1.3105	1.3105	xxY
aroE	aroE	NZ_CP007627.1	1154283..1155020	32	1.43563	1.74406	1.30866	N/A
gene613	FE46_RS03030	NZ_CP007627.1	complement(720967..721749)	32	1.35312	1.64382	1.30866	hypothetical protein FPSM_00632
gene673	FE46_RS03335	NZ_CP007627.1	complement(797995..798735)	166	7.41719	9.01067	1.30552	isoprenyl transferase
gene1621	FE46_RS08015	NZ_CP007627.1	1846216..1846647	14	1.07299	1.3035	1.3035	NUDIX domain-containing
gene1911	FE46_RS09455	NZ_CP007627.1	complement(2141904..2142428)	17	1.07211	1.30244	1.30244	ankyrin repeat domain-containing
gene2296	FE46_RS11375	NZ_CP007627.1	complement(2566417..2567499)	331	10.1193	12.2933	1.30159	agmatinase family
gene2559	FE46_RS12670	NZ_CP007627.1	complement(2864001..2864384)	70	6.03554	7.3322	1.30123	polymer-forming cytoskeletal
gene131	FE46_RS00655	NZ_CP007627.1	complement(160929..161672)	70	3.11512	3.78436	1.30123	BatE protein
gene2029	FE46_RS10040	NZ_CP007627.1	2279079..2280125	70	2.21361	2.68917	1.30123	endonuclease
gene1576	FE46_RS07790	NZ_CP007627.1	complement(1794551..1795939)	387	9.22483	11.2067	1.29727	Dihydrolipoyl dehydrogenase
gene128	FE46_RS00640	NZ_CP007627.1	complement(158756..159775)	76	2.46697	2.99696	1.29503	phenylalanine--tRNA ligase subunit alpha
gene752	FE46_RS03725	NZ_CP007627.1	874163..876628	79	1.06068	1.28855	1.28855	carboxypeptidase-like regulatory domain-containing
gene566	FE46_RS02800	NZ_CP007627.1	666378..667580	63	1.7339	2.10641	1.28822	hypothetical protein
gene1149	FE46_RS05695	NZ_CP007627.1	complement(1308410..1310422)	296	4.86853	5.91446	1.28778	Thiol:disulfide interchange
gene97	FE46_RS00490	NZ_CP007627.1	125070..126353	41	1.05723	1.28436	1.28436	Uncharacterised protein
gene1064	FE46_RS05270	NZ_CP007627.1	complement(1223577..1223984)	69	5.59936	6.80231	1.28264	DNA primase
gene2277	FE46_RS11280	NZ_CP007627.1	complement(2545040..2545534)	25	1.67219	2.03143	1.27799	family cysteine cluster
gene1683	FE46_RS08325	NZ_CP007627.1	complement(1911973..1912779)	50	2.05138	2.49209	1.27799	phosphatidate cytidylyltransferase
gene1719	FE46_RS08505	NZ_CP007627.1	complement(1949179..1950558)	25	0.599806	0.728666	1.27799	N/A
gene2579	FE46_RS12770	NZ_CP007627.1	complement(2884610..2886766)	230	3.53043	4.28889	1.27108	RNA-binding transcriptional accessory
gene2072	FE46_RS10255	NZ_CP007627.1	complement(2330290..2331558)	40	1.04363	1.26784	1.26784	DUF2851 family
gene1324	FE46_RS06545	NZ_CP007627.1	complement(1505992..1506435)	31	2.31168	2.80832	1.26777	Uncharacterized membrane
gene2502	FE46_RS12390	NZ_CP007627.1	complement(2797278..2799152)	130	2.29558	2.78875	1.26582	cell envelope biogenesis
gene888	FE46_RS04405	NZ_CP007627.1	1033047..1035443	68	0.93927	1.14106	1.26405	N/A
gene965	FE46_RS04775	NZ_CP007627.1	1106012..1107097	34	1.03657	1.25926	1.25926	efflux RND transporter periplasmic adaptor subunit
gene1131	FE46_RS05605	NZ_CP007627.1	complement(1289125..1290144)	203	6.58939	8.00503	1.25785	heme A synthase
gene1615	FE46_RS07985	NZ_CP007627.1	1841208..1842512	92	2.33414	2.8356	1.25414	ABC transporter permease
gene64	FE46_RS00325	NZ_CP007627.1	83806..85611	417	7.64483	9.28722	1.25394	lysophospholipid acyltransferase family protein
gene641	FE46_RS03175	NZ_CP007627.1	complement(756700..758145)	45	1.03037	1.25173	1.25173	amino acid permease
gene348	FE46_RS01720	NZ_CP007627.1	complement(413026..415557)	61	0.797656	0.969022	1.24732	N/A
gene1387	FE46_RS06860	NZ_CP007627.1	1581726..1583306	49	1.02616	1.24661	1.24661	FMN-binding glutamate synthase family
gene838	FE46_RS04155	NZ_CP007627.1	complement(971747..972355)	73	3.96876	4.8214	1.24391	hypothetical protein
gene2463	FE46_RS12195	NZ_CP007627.1	complement(2754725..2756095)	146	3.52586	4.28334	1.24391	saccharopine dehydrogenase
gene1798	FE46_RS08895	NZ_CP007627.1	complement(2034016..2034252)	103	14.3893	17.4806	1.2389	Hypothetical transmembrane
gene317	FE46_RS01560	NZ_CP007627.1	370848..371144	133	14.8267	18.012	1.23617	thioredoxin family protein
gene225	FE46_RS01115	NZ_CP007627.1	complement(263498..264250)	23	1.01131	1.22857	1.22857	cyclase family protein
gene341	FE46_RS01680	NZ_CP007627.1	complement(398082..398426)	6	0.575813	0.699519	1.22687	N/A
gene1002	FE46_RS04960	NZ_CP007627.1	1147515..1149335	36	0.654549	0.79517	1.22687	N/A
gene749	FE46_RS03710	NZ_CP007627.1	complement(871289..872188)	42	1.5451	1.87704	1.22687	site-specific tyrosine recombinase
gene433	FE46_RS02140	NZ_CP007627.1	complement(513046..513303)	138	17.7096	21.5143	1.22687	Hypothetical lipo precursor
gene1735	FE46_RS08585	NZ_CP007627.1	1964915..1965118	12	1.9476	2.36602	1.22687	hypothetical protein
gene1812	FE46_RS08975	NZ_CP007627.1	2045553..2046383	60	2.39056	2.90414	1.22687	Bro-N domain-containing
gene395	FE46_RS01955	NZ_CP007627.1	466147..466479	30	2.98282	3.62363	1.22687	MGMT family
gene1277	FE46_RS06310	NZ_CP007627.1	complement(1455168..1455446)	48	5.69622	6.91997	1.22687	DUF2089 family
gene1312	FE46_RS06485	NZ_CP007627.1	1495749..1497011	132	3.46035	4.20376	1.22687	mechanosensitive ion channel
gene353	FE46_RS01745	NZ_CP007627.1	complement(418965..419294)	24	2.40795	2.92526	1.22687	2TM domain-containing
gene509	FE46_RS02515	NZ_CP007627.1	complement(598656..599042)	18	1.53997	1.87081	1.22687	transposase family
gene1338	FE46_RS06615	NZ_CP007627.1	complement(1522145..1522927)	42	1.77598	2.15752	1.22687	acyl-ACP--UDP-N-acetylglucosamine O-acyltransferase
gene1966	FE46_RS09730	NZ_CP007627.1	2206033..2206956	18	0.644986	0.783552	1.22687	N/A
gene688	FE46_RS03410	NZ_CP007627.1	810728..811771	305	9.67273	11.7508	1.22286	23S rRNA (adenine(2503)-C(2))-methyltransferase
gene997	FE46_RS04935	NZ_CP007627.1	1140129..1141238	293	8.73965	10.6172	1.2227	Collagenase precursor
gene1605	FE46_RS07935	NZ_CP007627.1	complement(1831987..1832823)	179	7.08072	8.60191	1.22006	DUF2807 domain-containing
gene552	FE46_RS02730	NZ_CP007627.1	646423..646686	8	1.00331	1.21886	1.21886	hypothetical protein
gene2343	FE46_RS11605	NZ_CP007627.1	complement(2631899..2632525)	321	16.9507	20.5923	1.21551	porin family
gene681	FE46_RS03375	NZ_CP007627.1	804758..805102	207	19.8656	24.1334	1.20935	phage holin family
gene1151	FE46_RS05705	NZ_CP007627.1	complement(1311943..1313229)	136	3.49873	4.25038	1.20909	Para-aminobenzoate synthase component I
gene1508	FE46_RS07450	NZ_CP007627.1	1719707..1721494	437	8.09214	9.83063	1.20753	ATP-binding cassette domain-containing
gene1208	FE46_RS05990	NZ_CP007627.1	1370436..1373423	118	1.30753	1.58843	1.20643	adenine methyltransferase
gene1447	FE46_RS07145	NZ_CP007627.1	1640059..1642005	665	11.3085	13.738	1.20335	threonine--tRNA ligase
gene1882	FE46_RS09310	NZ_CP007627.1	2112858..2113298	388	29.1302	35.3884	1.20209	Beta-carotene hydroxylase
gene2206	FE46_RS10925	NZ_CP007627.1	complement(2469165..2469479)	508	53.3953	64.8665	1.19397	50S ribosomal L24
gene123	FE46_RS00615	NZ_CP007627.1	154465..155622	35	1.00071	1.2157	1.19279	8-amino-7-oxononanoate synthase
gene235	FE46_RS01165	NZ_CP007627.1	271654..275055	350	3.4063	4.1381	1.19279	isoleucine--tRNA ligase
gene653	FE46_RS03235	NZ_CP007627.1	complement(777836..779278)	478	10.9676	13.3238	1.19196	family
gene2346	FE46_RS11620	NZ_CP007627.1	complement(2633748..2634524)	23	0.980069	1.19062	1.19062	polysaccharide deacetylase family
gene1062	FE46_RS05260	NZ_CP007627.1	1221521..1222201	29	1.40994	1.71285	1.18598	Cytidylate kinase
gene998	FE46_RS04940	NZ_CP007627.1	1141344..1142546	29	0.798145	0.969616	1.18598	N/A
gene2414	FE46_RS11960	NZ_CP007627.1	complement(2705795..2706949)	29	0.831315	1.00991	1.18598	beta-ketoacyl synthase
gene2140	FE46_RS10595	NZ_CP007627.1	complement(2404416..2405672)	37	0.974577	1.18395	1.18395	glycosyltransferase family 4
gene114	FE46_RS00575	NZ_CP007627.1	142326..143135	582	23.7896	28.9005	1.17828	Glycogen synthase
gene2023	FE46_RS10015	NZ_CP007627.1	2273221..2273514	218	24.5504	29.8247	1.17306	cell division
gene588	FE46_RS02910	NZ_CP007627.1	690588..690848	40	5.07422	6.16434	1.16845	hypothetical protein
gene1058	FE46_RS05240	NZ_CP007627.1	1215068..1215880	656	26.7155	32.4549	1.16642	M48 family metallopeptidase
gene314	FE46_RS01545	NZ_CP007627.1	complement(365249..366559)	38	0.959689	1.16586	1.16586	D-Ala-D-Ala carboxypeptidase
gene61	FE46_RS00310	NZ_CP007627.1	complement(80640..81680)	74	2.35359	2.85922	1.16396	aldo/keto reductase
gene2190	FE46_RS10845	NZ_CP007627.1	complement(2460958..2461446)	891	60.3279	73.2886	1.16045	50S ribosomal L17
gene1256	FE46_RS06220	NZ_CP007627.1	complement(1433497..1434186)	17	0.815736	0.990985	1.15871	N/A
gene2546	FE46_RS12605	NZ_CP007627.1	complement(2849877..2851067)	17	0.472592	0.574122	1.15871	N/A
gene2235	FE46_RS11070	NZ_CP007627.1	complement(2495974..2496981)	96	3.15326	3.8307	1.1547	GTPase
gene759	FE46_RS03760	NZ_CP007627.1	882417..884309	96	1.67908	2.0398	1.1547	ATP-dependent DNA helicase 2
gene1613	FE46_RS07975	NZ_CP007627.1	1838912..1840036	1163	34.2276	41.581	1.15441	molecular chaperone
gene743	FE46_RS03680	NZ_CP007627.1	complement(865209..865820)	62	3.35421	4.07481	1.15252	HAD family phosphatase
gene69	FE46_RS00350	NZ_CP007627.1	complement(89917..90696)	146	6.19738	7.5288	1.14823	16S rRNA (adenine(1518)-N(6)/adenine(1519)-N(6))-dimethyltransferase RsmA
gene2469	FE46_RS12225	NZ_CP007627.1	complement(2760980..2761981)	73	2.41215	2.93037	1.14823	ketoacyl-ACP synthase III
gene2102	FE46_RS10405	NZ_CP007627.1	2366709..2367347	28	1.4508	1.76248	1.14508	hypothetical protein
gene675	FE46_RS03345	NZ_CP007627.1	complement(799561..800445)	25	0.93529	1.13622	1.13622	NAD kinase
gene693	FE46_RS03435	NZ_CP007627.1	815176..816231	150	4.70302	5.7134	1.13599	hypothetical protein
gene914	FE46_RS04525	NZ_CP007627.1	complement(1058933..1060138)	61	1.67468	2.03446	1.13393	NO-inducible flavohemo
gene1229	FE46_RS06095	NZ_CP007627.1	1396771..1398015	35	0.930783	1.13075	1.13075	site-specific integrase
gene1085	FE46_RS05375	NZ_CP007627.1	1247352..1249385	57	0.927841	1.12717	1.12717	potassium-transporting ATPase subunit
gene1596	FE46_RS07890	NZ_CP007627.1	complement(1822338..1822694)	10	0.927431	1.12668	1.12668	hypothetical protein
gene880	FE46_RS04365	NZ_CP007627.1	1024195..1025280	303	9.23767	11.2223	1.12649	peptidylprolyl isomerase
gene79	FE46_RS00400	NZ_CP007627.1	complement(102057..102548)	11	0.740248	0.89928	1.12463	N/A
gene1427	FE46_RS07055	NZ_CP007627.1	1623074..1623490	88	6.98709	8.48817	1.12463	large conductance mechanosensitive channel
gene2154	FE46_RS10665	NZ_CP007627.1	complement(2420360..2421157)	22	0.912787	1.10889	1.12463	sugar transporter
gene522	FE46_RS02580	NZ_CP007627.1	607889..609037	32	0.922103	1.1202	1.1202	ATP-binding
gene249	FE46_RS01235	NZ_CP007627.1	complement(290357..293773)	95	0.920509	1.11827	1.11827	T9SS type A sorting domain-containing protein
gene1878	FE46_RS09290	NZ_CP007627.1	complement(2108380..2109522)	49	1.41938	1.72432	1.11327	Lycopene cyclase
gene251	FE46_RS01245	NZ_CP007627.1	296961..297893	76	2.697	3.27642	1.11003	bifunctional riboflavin kinase/FAD synthetase
gene2450	FE46_RS12130	NZ_CP007627.1	complement(2739100..2739975)	211	7.97495	9.68826	1.10628	Cell division
gene1962	FE46_RS09710	NZ_CP007627.1	complement(2202767..2203717)	70	2.43707	2.96063	1.10104	family
gene1084	FE46_RS05370	NZ_CP007627.1	1245530..1247251	47	0.903679	1.09782	1.09782	potassium-transporting ATPase subunit
gene2395	FE46_RS11865	NZ_CP007627.1	2687425..2690913	134	1.27161	1.5448	1.09601	T9SS type B sorting domain-containing
gene975	FE46_RS04825	NZ_CP007627.1	1118165..1120582	804	11.009	13.3742	1.09601	family
gene2300	FE46_RS11390	NZ_CP007627.1	complement(2570477..2571112)	518	26.9664	32.7597	1.09196	50S ribosomal L21
gene1857	FE46_RS09185	NZ_CP007627.1	2094902..2095450	16	0.964933	1.17224	1.09055	DUF1599 domain-containing
gene1019	FE46_RS05045	NZ_CP007627.1	complement(1173349..1174122)	32	1.36886	1.66294	1.09055	nucleoside triphosphate pyrophosphohydrolase
gene1549	FE46_RS07655	NZ_CP007627.1	1764120..1764626	16	1.04487	1.26934	1.09055	hypothetical protein
gene1037	FE46_RS05135	NZ_CP007627.1	complement(1188698..1189894)	16	0.442563	0.537642	1.09055	N/A
gene1449	FE46_RS07155	NZ_CP007627.1	1642679..1642876	573	95.8162	116.401	1.08487	50S ribosomal L35
gene1409	FE46_RS06970	NZ_CP007627.1	1606873..1608264	152	3.61538	4.39209	1.07175	redoxin domain-containing
gene1089	FE46_RS05395	NZ_CP007627.1	1252638..1254368	46	0.879854	1.06888	1.06888	PAS domain-containing
gene1069	FE46_RS05295	NZ_CP007627.1	1229153..1230058	24	0.877067	1.06549	1.06549	ribonuclease Z
gene3	FE46_RS00020	NZ_CP007627.1	5994..6842	52	2.02789	2.46356	1.06329	class I SAM-dependent methyltransferase
gene1365	FE46_RS06750	NZ_CP007627.1	1555431..1557062	43	0.872364	1.05978	1.05978	M1 family metallopeptidase
gene2321	FE46_RS11495	NZ_CP007627.1	2597347..2600124	413	4.92229	5.97978	1.05562	N/A
gene1679	FE46_RS08305	NZ_CP007627.1	complement(1907823..1909181)	36	0.877067	1.06549	1.05161	peptidase S41
gene102	FE46_RS00515	NZ_CP007627.1	129856..130725	678	25.8024	31.3457	1.05028	putative lipoprotein
gene2153	FE46_RS10660	NZ_CP007627.1	complement(2417991..2420351)	179	2.51019	3.04947	1.04576	tyrosine kinase
gene1585	FE46_RS07835	NZ_CP007627.1	1802060..1803274	368	10.0282	12.1826	1.04511	methyltransferase domain-containing
gene2425	FE46_RS12015	NZ_CP007627.1	complement(2718486..2720162)	199	3.92889	4.77295	1.04337	peptide MFS transporter
gene1978	FE46_RS09790	NZ_CP007627.1	complement(2218499..2218966)	209	14.786	17.9625	1.04234	hypothetical protein
gene2421	FE46_RS11995	NZ_CP007627.1	2713753..2715786	158	2.57191	3.12445	1.04218	family competence
gene662	FE46_RS03280	NZ_CP007627.1	complement(785247..786149)	117	4.28991	5.21153	1.04018	protoheme IX farnesyltransferase
gene28	FE46_RS00145	NZ_CP007627.1	50444..50641	15	2.50828	3.04715	1.02239	Uncharacterised protein
gene481	FE46_RS02375	NZ_CP007627.1	complement(566911..567786)	25	0.944899	1.1479	1.02239	branched-chain amino acid transaminase
gene903	FE46_RS04470	NZ_CP007627.1	complement(1048908..1049513)	50	2.73179	3.31867	1.02239	trimeric intracellular cation channel family
gene279	FE46_RS01370	NZ_CP007627.1	complement(324003..324929)	80	2.85733	3.47118	1.02239	DUF58 domain-containing protein
gene1122	FE46_RS05560	NZ_CP007627.1	complement(1281189..1281563)	65	5.73894	6.97187	1.02239	T9SS type A sorting domain-containing
gene1533	FE46_RS07575	NZ_CP007627.1	complement(1745569..1746882)	60	1.51184	1.83664	1.02239	tetratricopeptide repeat
gene113	FE46_RS00570	NZ_CP007627.1	complement(141369..142217)	20	0.779959	0.947523	1.02239	N/A
gene539	FE46_RS02665	NZ_CP007627.1	629569..631677	25	0.392476	0.476794	1.02239	N/A
gene2074	FE46_RS10265	NZ_CP007627.1	complement(2332960..2334321)	234	5.68838	6.91045	1.01804	cystathionine beta-synthase
gene2433	FE46_RS13310	NZ_CP007627.1	complement(2726792..2726989)	5	0.836093	1.01572	1.01572	WG repeat-containing
gene2286	FE46_RS11325	NZ_CP007627.1	complement(2554732..2556426)	1564	30.5504	37.1137	1.01525	tetratricopeptide repeat
gene274	FE46_RS01345	NZ_CP007627.1	317744..318913	59	1.66961	2.02831	1.00535	hypothetical protein
gene2201	FE46_RS10900	NZ_CP007627.1	complement(2466878..2467228)	735	69.3314	84.2263	1.00195	50S ribosomal L18
gene1209	FE46_RS05995	NZ_CP007627.1	1373410..1375015	40	0.824639	1.0018	1.0018	class I SAM-dependent methyltransferase
gene1689	FE46_RS08355	NZ_CP007627.1	complement(1917801..1918028)	34	4.93735	5.99807	0.993183	membrane insertion efficiency factor
gene51	FE46_RS00260	NZ_CP007627.1	complement(71342..72076)	135	6.0813	7.38778	0.98588	1-acyl-sn-glycerol-3-phosphate acyltransferase
gene1161	FE46_RS05755	NZ_CP007627.1	1321772..1326298	96	0.702118	0.852959	0.981499	N/A
gene425	FE46_RS02100	NZ_CP007627.1	501298..503061	470	8.82163	10.7168	0.980664	signal peptide peptidase
gene153	FE46_RS00755	NZ_CP007627.1	complement(183088..184731)	67	1.34934	1.63923	0.978577	glucose-6-phosphate isomerase
gene2416	FE46_RS11970	NZ_CP007627.1	complement(2708392..2709009)	15	0.803623	0.97627	0.97627	N/A
gene1066	FE46_RS05280	NZ_CP007627.1	complement(1225146..1226540)	62	1.47152	1.78766	0.975207	Arginine decarboxylase
gene902	FE46_RS04465	NZ_CP007627.1	complement(1047706..1048683)	57	1.92968	2.34425	0.971275	GNAT family N-acetyltransferase
gene2477	FE46_RS12265	NZ_CP007627.1	complement(2767609..2767932)	19	1.94159	2.35872	0.971275	SUF system Fe-S cluster assembly
gene1113	FE46_RS05515	NZ_CP007627.1	1270874..1271437	33	1.93724	2.35343	0.963972	gliding motility lipo
gene2453	FE46_RS12145	NZ_CP007627.1	2742010..2744898	69	0.790772	0.960658	0.960658	N/A
gene1612	FE46_RS07970	NZ_CP007627.1	1838281..1838853	928	53.622	65.1419	0.958366	nucleotide exchange factor
gene2052	FE46_RS10155	NZ_CP007627.1	complement(2311950..2312258)	70	7.50048	9.11186	0.954235	DUF3467 domain-containing
gene810	FE46_RS04010	NZ_CP007627.1	934772..935338	37	2.16057	2.62474	0.945715	DUF4494 domain-containing
gene2011	FE46_RS09955	NZ_CP007627.1	complement(2258035..2259363)	424	10.5631	12.8324	0.942381	tRNA (N(6)-L-threonylcarbamoyladenosine(37)-C(2))-methylthiotransferase
gene1281	FE46_RS06330	NZ_CP007627.1	complement(1457959..1458357)	23	1.90855	2.31858	0.940603	cytochrome c
gene1746	FE46_RS08635	NZ_CP007627.1	complement(1973609..1974463)	41	1.5877	1.92879	0.931515	family
gene531	FE46_RS02625	NZ_CP007627.1	complement(619653..620516)	20	0.766418	0.931073	0.931073	N/A
gene1246	FE46_RS06175	NZ_CP007627.1	1418394..1419041	15	0.766418	0.931073	0.931073	N/A
gene214	FE46_RS01060	NZ_CP007627.1	complement(255354..256277)	1228	44.0024	53.4557	0.93	sugar kinase
gene1550	FE46_RS07660	NZ_CP007627.1	1764757..1765494	17	0.76268	0.926531	0.926531	N/A
gene1059	FE46_RS05245	NZ_CP007627.1	1216155..1217504	31	0.760287	0.923624	0.923624	N/A
gene833	FE46_RS04130	NZ_CP007627.1	967997..968314	9	0.937055	1.13837	0.920155	type II toxin-antitoxin system family toxin
gene479	FE46_RS02365	NZ_CP007627.1	complement(563509..565203)	45	0.879007	1.06785	0.920155	biosynthetic-type acetolactate synthase large subunit
gene259	FE46_RS01285	NZ_CP007627.1	complement(303314..304543)	27	0.726789	0.882929	0.920155	N/A
gene33	FE46_RS00170	NZ_CP007627.1	complement(55110..55505)	18	1.50497	1.82829	0.920155	c-type cytochrome
gene2568	FE46_RS12715	NZ_CP007627.1	2873772..2875106	45	1.11604	1.35581	0.920155	phenylacetate-- ligase family
gene1146	FE46_RS05680	NZ_CP007627.1	complement(1304637..1305605)	27	0.922549	1.12075	0.920155	lipopolysaccharide biosynthesis
gene2278	FE46_RS11285	NZ_CP007627.1	2545701..2546402	54	2.54687	3.09403	0.920155	class I SAM-dependent methyltransferase
gene432	FE46_RS02135	NZ_CP007627.1	511770..512801	81	2.59869	3.15699	0.920155	UDP-glucose 4-epimerase
gene1564	FE46_RS07730	NZ_CP007627.1	1781017..1781775	18	0.7852	0.953889	0.920155	N/A
gene723	FE46_RS03585	NZ_CP007627.1	complement(848826..849092)	359	44.5177	54.0817	0.917599	30S ribosomal S15
gene280	FE46_RS01375	NZ_CP007627.1	complement(325152..325469)	928	96.6208	117.378	0.91229	thioredoxin
gene1891	FE46_RS13270	NZ_CP007627.1	complement(2120573..2122249)	38	0.75024	0.911419	0.911419	N/A
gene1957	N/A	NZ_CP007627.1	complement(2195891..2197406)	321884	7029.91	8540.19	0.911041	N/A
gene1614	FE46_RS07980	NZ_CP007627.1	1840200..1841120	93	3.34328	4.06154	0.905549	ABC transporter ATP-binding
gene2088	FE46_RS10335	NZ_CP007627.1	2352180..2352896	137	6.32632	7.68544	0.903665	SAM-dependent methyltransferase
gene1273	FE46_RS06295	NZ_CP007627.1	complement(1451520..1452230)	53	2.46806	2.99829	0.903115	DUF4369 domain-containing
gene989	FE46_RS04895	NZ_CP007627.1	1130185..1132347	141	2.1583	2.62198	0.900985	N/A
gene2081	FE46_RS10300	NZ_CP007627.1	2345145..2345489	273	26.1995	31.8281	0.900367	hypothetical protein
gene966	FE46_RS04780	NZ_CP007627.1	1107265..1110489	66	0.677585	0.823155	0.899707	N/A
gene2396	FE46_RS11870	NZ_CP007627.1	2690966..2691697	22	0.995087	1.20887	0.899707	Hypothetical lipo precursor
gene1311	FE46_RS06480	NZ_CP007627.1	1495478..1495756	22	2.61077	3.17165	0.899707	DUF3817 domain-containing
gene1323	FE46_RS06540	NZ_CP007627.1	complement(1504843..1505700)	22	0.848956	1.03134	0.899707	ATP phosphoribosyltransferase
gene1921	FE46_RS09505	NZ_CP007627.1	2149968..2151083	425	12.6088	15.3176	0.895913	Iron-regulated A precursor
gene1761	FE46_RS08710	NZ_CP007627.1	1989465..1989848	245	21.1244	25.6627	0.894595	N/A
gene1007	FE46_RS04985	NZ_CP007627.1	complement(1155036..1155980)	70	2.45254	2.97943	0.894595	23S rRNA (adenine(1618)-N(6))-methyltransferase
gene8	FE46_RS00045	NZ_CP007627.1	complement(15057..15566)	13	0.843962	1.02528	0.886075	Crp/Fnr family transcriptional regulator
gene2303	FE46_RS11405	NZ_CP007627.1	complement(2574381..2576264)	167	2.93485	3.56536	0.875589	NADH-quinone oxidoreductase subunit L
gene1633	FE46_RS08075	NZ_CP007627.1	1855491..1856534	47	1.49055	1.81078	0.873682	family pseudouridine synthase
gene1524	FE46_RS07530	NZ_CP007627.1	complement(1733412..1736417)	65	0.715936	0.869744	0.869744	N/A
gene1450	FE46_RS07160	NZ_CP007627.1	1643051..1643395	3366	323.031	392.43	0.866846	50S ribosomal L20
gene2005	FE46_RS09925	NZ_CP007627.1	complement(2251511..2253052)	148	3.1778	3.86051	0.864653	signal peptidase I
gene995	FE46_RS04925	NZ_CP007627.1	1137079..1138149	23	0.71103	0.863785	0.863785	N/A
gene115	FE46_RS00580	NZ_CP007627.1	143135..144799	720	14.3175	17.3934	0.860964	DUF4270 domain-containing protein
gene480	FE46_RS02370	NZ_CP007627.1	complement(565221..566897)	42	0.829213	1.00736	0.858811	dihydroxy-acid dehydratase
gene687	FE46_RS03405	NZ_CP007627.1	complement(810008..810649)	63	3.24904	3.94705	0.858811	O-methyltransferase
gene1111	FE46_RS05505	NZ_CP007627.1	1269369..1270400	22	0.705818	0.857453	0.857453	N/A
gene686	FE46_RS03400	NZ_CP007627.1	809381..809944	180	10.5668	12.8369	0.855958	phosphatase PAP2 family
gene159	FE46_RS00785	NZ_CP007627.1	190292..190573	6	0.704453	0.855794	0.855794	N/A
gene2301	FE46_RS11395	NZ_CP007627.1	complement(2571514..2572881)	46	1.11332	1.35251	0.855093	NADH-quinone oxidoreductase subunit N
gene661	FE46_RS03275	NZ_CP007627.1	complement(784657..785241)	100	5.6597	6.87561	0.851995	cytochrome oxidase subunit III
gene1475	FE46_RS07285	NZ_CP007627.1	1678669..1679190	11	0.697705	0.847597	0.847597	N/A
gene1608	FE46_RS07950	NZ_CP007627.1	complement(1835428..1835757)	174	17.4576	21.2081	0.847127	family transcriptional regulator
gene1749	FE46_RS08650	NZ_CP007627.1	complement(1978503..1978904)	62	5.10641	6.20345	0.845179	biopolymer transporter
gene900	FE46_RS04455	NZ_CP007627.1	complement(1045331..1046605)	33	0.856946	1.04105	0.843475	O-antigen translocase
gene803	FE46_RS03975	NZ_CP007627.1	926894..928804	132	2.28698	2.77831	0.843475	glycosyl transferase family 2
gene1666	FE46_RS08240	NZ_CP007627.1	1889451..1891415	301	5.0717	6.16128	0.843125	potassium transporter Kup
gene2275	FE46_RS11270	NZ_CP007627.1	complement(2542450..2543703)	37	0.976908	1.18678	0.840635	ABC transporter permease
gene877	FE46_RS04350	NZ_CP007627.1	1021469..1022479	86	2.81642	3.42148	0.83739	bifunctional oligoribonuclease PAP phosphatase
gene100	FE46_RS00505	NZ_CP007627.1	127651..128613	20	0.687628	0.835355	0.835355	N/A
gene421	FE46_RS02080	NZ_CP007627.1	complement(496154..498754)	54	0.68739	0.835066	0.835066	N/A
gene1525	FE46_RS07535	NZ_CP007627.1	complement(1736569..1737051)	10	0.685492	0.832761	0.832761	N/A
gene1531	FE46_RS07565	NZ_CP007627.1	1742361..1745054	338	4.15402	5.04646	0.832697	organic solvent tolerance
gene2566	FE46_RS12705	NZ_CP007627.1	2871914..2872144	175	25.0828	30.4715	0.832181	uracil phosphoribosyltransferase
gene1395	FE46_RS06900	NZ_CP007627.1	1591893..1592426	11	0.682026	0.82855	0.82855	N/A
gene580	FE46_RS12950	NZ_CP007627.1	681062..681829	85	3.66444	4.45169	0.827653	carboxypeptidase regulatory-like domain-containing
gene2125	FE46_RS10520	NZ_CP007627.1	complement(2389310..2390428)	23	0.68053	0.826733	0.826733	N/A
gene2495	FE46_RS12355	NZ_CP007627.1	complement(2788392..2788985)	295	16.4432	19.9757	0.826319	family transcriptional regulator
gene1288	FE46_RS06365	NZ_CP007627.1	complement(1465104..1465682)	8	0.457468	0.555749	0.817915	N/A
gene1836	FE46_RS09085	NZ_CP007627.1	2071689..2072372	8	0.387243	0.470437	0.817915	N/A
gene2177	FE46_RS10780	NZ_CP007627.1	complement(2444456..2446903)	32	0.432801	0.525782	0.817915	N/A
gene2146	FE46_RS10625	NZ_CP007627.1	complement(2410607..2411293)	8	0.385552	0.468382	0.817915	N/A
gene1021	FE46_RS05055	NZ_CP007627.1	complement(1174827..1175411)	56	3.16943	3.85034	0.817915	peptide deformylase
gene80	FE46_RS00405	NZ_CP007627.1	102809..103402	32	1.78366	2.16686	0.817915	proline hydroxylase
gene561	FE46_RS02775	NZ_CP007627.1	complement(659316..660329)	84	2.74278	3.33203	0.817915	DUF1016 domain-containing
gene1926	FE46_RS09530	NZ_CP007627.1	complement(2156078..2156296)	4	0.604736	0.734655	0.817915	N/A
gene283	FE46_RS01390	NZ_CP007627.1	complement(327541..328332)	16	0.668874	0.812572	0.817915	N/A
gene1226	FE46_RS06080	NZ_CP007627.1	complement(1394635..1395030)	8	0.668874	0.812572	0.812572	N/A
gene2134	FE46_RS10565	NZ_CP007627.1	complement(2398758..2399798)	21	0.66791	0.811402	0.811402	N/A
gene1411	FE46_RS06980	NZ_CP007627.1	complement(1609284..1610087)	39	1.60605	1.95108	0.797468	SDR family oxidoreductase
gene634	FE46_RS03140	NZ_CP007627.1	complement(749666..751366)	216	4.20435	5.1076	0.788704	L,D-transpeptidase family
gene1224	FE46_RS06070	NZ_CP007627.1	complement(1394237..1394389)	3	0.649201	0.788673	0.788673	N/A
gene438	FE46_RS02165	NZ_CP007627.1	complement(517584..518681)	231	6.96561	8.46208	0.787244	acyl- desaturase
gene2239	FE46_RS11090	NZ_CP007627.1	complement(2499306..2499839)	50	3.10012	3.76614	0.786457	hypoxanthine phosphoribosyltransferase
gene2389	FE46_RS11835	NZ_CP007627.1	2673044..2677657	90	0.645825	0.784571	0.784571	N/A
gene1892	FE46_RS09360	NZ_CP007627.1	complement(2122434..2122946)	10	0.645405	0.784061	0.784061	N/A
gene1436	FE46_RS07100	NZ_CP007627.1	1629802..1630551	23	1.01535	1.23349	0.783836	DDE transposase
gene573	FE46_RS02835	NZ_CP007627.1	675437..676639	84	2.31187	2.80854	0.780737	IS256 family transposase
gene1760	FE46_RS08705	NZ_CP007627.1	1987642..1989402	42	0.789659	0.959306	0.780737	N/A
gene1272	FE46_RS06290	NZ_CP007627.1	complement(1449961..1451157)	1732	47.9075	58.1997	0.780082	ADP-forming succinate-- ligase subunit beta
gene105	FE46_RS00530	NZ_CP007627.1	complement(134318..136273)	80	1.35416	1.64509	0.778967	glycosyl transferase
gene1211	FE46_RS06005	NZ_CP007627.1	1375479..1376915	19	0.43777	0.531819	0.77702	N/A
gene2066	FE46_RS10225	NZ_CP007627.1	complement(2326118..2326420)	186	20.3245	24.6909	0.776185	ribosome-associated translation inhibitor
gene237	FE46_RS01175	NZ_CP007627.1	275679..276272	72	4.01325	4.87543	0.774867	lipoprotein signal peptidase
gene2128	FE46_RS10535	NZ_CP007627.1	complement(2391793..2392785)	19	0.633511	0.769612	0.769612	N/A
gene2044	FE46_RS10115	NZ_CP007627.1	complement(2295794..2296537)	30	1.33505	1.62187	0.766796	SDR family NAD(P)-dependent oxidoreductase
gene2092	FE46_RS10355	NZ_CP007627.1	complement(2355597..2356130)	15	0.930036	1.12984	0.766796	GNAT family N-acetyltransferase
gene1231	FE46_RS06105	NZ_CP007627.1	complement(1398902..1399867)	15	0.514119	0.62457	0.766796	N/A
gene1794	FE46_RS08875	NZ_CP007627.1	2030294..2031490	30	0.829806	1.00808	0.766796	tetratricopeptide repeat
gene696	FE46_RS03450	NZ_CP007627.1	819206..821191	60	1.00028	1.21518	0.766796	DNA primase
gene2083	FE46_RS10310	NZ_CP007627.1	complement(2347407..2348270)	131	5.02004	6.09853	0.765335	peptidoglycan-binding domain-containing
gene1169	FE46_RS05795	NZ_CP007627.1	1335581..1336510	275	9.79038	11.8937	0.759888	lipo
gene1201	FE46_RS05955	NZ_CP007627.1	1365372..1366871	26	0.573894	0.697187	0.759493	N/A
gene1337	FE46_RS06610	NZ_CP007627.1	complement(1521514..1522077)	37	2.17206	2.6387	0.756572	elongation factor P
gene2536	FE46_RS12560	NZ_CP007627.1	complement(2841130..2841714)	11	0.622568	0.756317	0.756317	N/A
gene537	FE46_RS02655	NZ_CP007627.1	625863..627599	48	0.914937	1.1115	0.754999	tellurite resistance
gene925	FE46_RS04580	NZ_CP007627.1	1070368..1071063	13	0.61842	0.751279	0.751279	N/A
gene1675	FE46_RS08285	NZ_CP007627.1	complement(1903286..1904239)	235	8.15585	9.90802	0.750821	acetyl- carboxylase carboxyltransferase subunit alpha
gene1948	FE46_RS09640	NZ_CP007627.1	2185934..2186830	77	2.84216	3.45275	0.749756	family transporter
gene1297	FE46_RS06410	NZ_CP007627.1	1473739..1475175	88	2.02757	2.46316	0.749756	family
gene680	FE46_RS03370	NZ_CP007627.1	803863..804639	172	7.32921	8.90379	0.748306	alpha beta fold hydrolase
gene2123	FE46_RS10510	NZ_CP007627.1	complement(2386892..2388244)	25	0.611775	0.743207	0.743207	N/A
gene1958	FE46_RS09690	NZ_CP007627.1	complement(2198439..2199116)	210	10.2551	12.4582	0.740355	DUF4294 domain-containing
gene1581	FE46_RS07815	NZ_CP007627.1	1799091..1799579	9	0.609373	0.740288	0.740288	N/A
gene2394	FE46_RS11860	NZ_CP007627.1	2686602..2687201	11	0.607003	0.73741	0.73741	N/A
gene1919	FE46_RS09495	NZ_CP007627.1	complement(2148287..2148520)	18	2.54687	3.09403	0.736124	thioredoxin family
gene252	FE46_RS01250	NZ_CP007627.1	298090..299178	169	5.13817	6.24203	0.735254	biotin synthase BioB
gene587	FE46_RS02905	NZ_CP007627.1	690163..690381	4	0.604736	0.734655	0.734655	N/A
gene290	FE46_RS01425	NZ_CP007627.1	complement(336720..337436)	13	0.600308	0.729275	0.729275	N/A
gene1437	FE46_RS07105	NZ_CP007627.1	complement(1630574..1631776)	32	0.880712	1.06992	0.727036	IS256 family transposase
gene1833	FE46_RS09070	NZ_CP007627.1	2068341..2069642	181	4.60275	5.59158	0.725699	30S ribosomal S12 methylthiotransferase
gene1890	FE46_RS09350	NZ_CP007627.1	complement(2119762..2120538)	14	0.596563	0.724727	0.724727	N/A
gene581	FE46_RS02875	NZ_CP007627.1	682658..683404	46	2.03886	2.47688	0.723541	hypothetical protein
gene1197	FE46_RS05935	NZ_CP007627.1	1362933..1363433	9	0.594777	0.722557	0.722557	N/A
gene2519	FE46_RS12475	NZ_CP007627.1	2822523..2823377	14	0.54214	0.658611	0.715676	N/A
gene1732	FE46_RS08570	NZ_CP007627.1	1963175..1963588	7	0.559819	0.680088	0.715676	N/A
gene2360	FE46_RS11690	NZ_CP007627.1	complement(2645519..2645980)	14	1.00331	1.21886	0.715676	ABC transporter permease
gene267	FE46_RS01310	NZ_CP007627.1	complement(310787..311239)	7	0.511622	0.621537	0.715676	N/A
gene462	FE46_RS02280	NZ_CP007627.1	544541..545161	11	0.586477	0.712473	0.712473	N/A
gene1910	FE46_RS09450	NZ_CP007627.1	complement(2141106..2141897)	14	0.585265	0.711001	0.711001	N/A
gene511	FE46_RS02525	NZ_CP007627.1	complement(599351..600595)	22	0.585063	0.710756	0.710756	N/A
gene2330	FE46_RS13295	NZ_CP007627.1	complement(2612814..2613371)	83	4.92486	5.98289	0.707156	IS5 family transposase
gene1537	FE46_RS07595	NZ_CP007627.1	1753897..1754400	38	2.49633	3.03264	0.706382	DUF421 domain-containing
gene2130	FE46_RS10545	NZ_CP007627.1	complement(2394326..2395465)	20	0.580864	0.705655	0.705655	N/A
gene2047	FE46_RS10130	NZ_CP007627.1	complement(2299476..2301452)	200	3.34945	4.06903	0.7051	peptidyl-prolyl cis-trans isomerase
gene1673	FE46_RS08275	NZ_CP007627.1	complement(1900536..1901552)	62	2.01846	2.4521	0.704316	Replicative DNA helicase
gene1855	FE46_RS09175	NZ_CP007627.1	2092187..2093944	31	0.583838	0.709268	0.704316	N/A
gene54	FE46_RS00275	NZ_CP007627.1	complement(73421..74101)	41	1.99336	2.42161	0.698636	RloB domain-containing protein
gene116	FE46_RS00585	NZ_CP007627.1	144806..146653	1394	24.9753	30.3409	0.696928	glutamine--fructose-6-phosphate transaminase (isomerizing)
gene1388	FE46_RS06865	NZ_CP007627.1	1583459..1584367	17	0.619205	0.752233	0.695228	N/A
gene2355	FE46_RS11665	NZ_CP007627.1	complement(2640954..2641706)	13	0.571608	0.69441	0.69441	N/A
gene1030	FE46_RS05100	NZ_CP007627.1	complement(1183227..1184255)	61	1.96275	2.38441	0.692956	family transcriptional regulator
gene424	FE46_RS02095	NZ_CP007627.1	complement(500032..501174)	61	1.76699	2.1466	0.692956	2-amino-4-hydroxy-6-hydroxymethyldihydropteridine diphosphokinase
gene934	FE46_RS04620	NZ_CP007627.1	complement(1077490..1078284)	213	8.87079	10.7766	0.691333	outer membrane assembly factor
gene1904	FE46_RS09420	NZ_CP007627.1	complement(2133725..2134756)	27	0.866231	1.05233	0.690116	tetraacyldisaccharide 4 -kinase
gene2523	FE46_RS12495	NZ_CP007627.1	complement(2827835..2828392)	27	1.60206	1.94624	0.690116	LPS export ABC transporter periplasmic
gene362	FE46_RS01790	NZ_CP007627.1	428184..430676	91	1.20856	1.4682	0.689169	carboxypeptidase-like regulatory domain-containing
gene1309	FE46_RS06470	NZ_CP007627.1	complement(1493240..1494784)	84	1.80012	2.18685	0.687049	DEAD DEAH box helicase
gene1993	FE46_RS09865	NZ_CP007627.1	2236474..2238606	77	1.19522	1.452	0.68456	S9 family peptidase
gene2268	FE46_RS11235	NZ_CP007627.1	complement(2533825..2535108)	87	2.24339	2.72535	0.684218	UDP-N-acetylmuramoyl-tripeptide--D-alanyl-D-alanine ligase
gene2530	FE46_RS12530	NZ_CP007627.1	2833706..2834659	649	22.524	27.363	0.684056	SPOR domain-containing
gene828	FE46_RS04105	NZ_CP007627.1	complement(959364..959696)	10	0.994272	1.20788	0.681596	family transcriptional regulator
gene1983	FE46_RS09815	NZ_CP007627.1	2222835..2223227	10	0.842475	1.02347	0.681596	hypothetical protein
gene1547	FE46_RS07645	NZ_CP007627.1	complement(1762260..1762568)	40	4.28599	5.20678	0.681596	XRE family transcriptional regulator
gene1499	FE46_RS07405	NZ_CP007627.1	1711570..1712049	10	0.689777	0.837965	0.681596	N/A
gene1070	FE46_RS05300	NZ_CP007627.1	1230148..1230792	53	2.72061	3.30509	0.677336	pyridoxamine 5 -phosphate oxidase
gene863	FE46_RS04280	NZ_CP007627.1	1002879..1004282	53	1.24985	1.51836	0.677336	lysophospholipase L1-like esterase
gene1886	FE46_RS09330	NZ_CP007627.1	complement(2115286..2115795)	952	61.804	75.0817	0.671255	sigma-70 family RNA polymerase sigma factor
gene548	FE46_RS02710	NZ_CP007627.1	644013..644432	7	0.551821	0.670372	0.670372	N/A
gene702	FE46_RS03480	NZ_CP007627.1	complement(825053..825817)	72	3.11617	3.78563	0.669204	alpha beta hydrolase
gene2439	FE46_RS12075	NZ_CP007627.1	complement(2731432..2732577)	19	0.548932	0.666862	0.666862	N/A
gene268	FE46_RS01315	NZ_CP007627.1	complement(311350..312330)	52	1.75503	2.13207	0.664556	ribosome small subunit-dependent GTPase A
gene2137	FE46_RS10580	NZ_CP007627.1	complement(2401384..2402595)	20	0.546358	0.663735	0.663735	N/A
gene2380	FE46_RS11790	NZ_CP007627.1	2664917..2665522	10	0.546358	0.663735	0.663735	N/A
gene909	FE46_RS04500	NZ_CP007627.1	complement(1055892..1056818)	15	0.535749	0.650847	0.650847	N/A
gene547	FE46_RS02705	NZ_CP007627.1	643018..644010	16	0.533483	0.648094	0.648094	N/A
gene776	FE46_RS03845	NZ_CP007627.1	complement(897822..898442)	10	0.533161	0.647703	0.647703	N/A
gene246	FE46_RS01220	NZ_CP007627.1	287492..288418	114	4.07169	4.94644	0.647516	tryptophan 2,3-dioxygenase
gene1005	FE46_RS04975	NZ_CP007627.1	1152735..1154129	419	9.94465	12.0811	0.644185	tetratricopeptide repeat
gene1117	FE46_RS05535	NZ_CP007627.1	complement(1277068..1277991)	220	7.88316	9.57675	0.642648	ABC transporter ATP-binding
gene1028	FE46_RS05090	NZ_CP007627.1	1181759..1182415	22	1.10868	1.34687	0.642648	family deoxyribonuclease
gene2280	FE46_RS11295	NZ_CP007627.1	complement(2547622..2548254)	47	2.45835	2.98649	0.6407	7-carboxy-7-deazaguanine synthase
gene1460	FE46_RS07210	NZ_CP007627.1	1656390..1658318	72	1.2358	1.5013	0.640108	alkaline phosphatase family
gene1296	FE46_RS06405	NZ_CP007627.1	1470579..1473746	169	1.76625	2.1457	0.639943	efflux RND transporter permease subunit
gene1325	FE46_RS06550	NZ_CP007627.1	1506529..1508622	25	0.395287	0.480209	0.638996	N/A
gene734	FE46_RS03635	NZ_CP007627.1	857669..858109	7	0.525544	0.63845	0.63845	N/A
gene2274	N/A	NZ_CP007627.1	complement(2539932..2541447)	323039	7055.14	8570.83	0.635621	N/A
gene1452	FE46_RS07170	NZ_CP007627.1	complement(1647192..1649063)	43	0.760523	0.923911	0.628042	N/A
gene1996	FE46_RS09880	NZ_CP007627.1	2240342..2242945	129	1.64021	1.99258	0.628042	DUF2339 domain-containing
gene136	FE46_RS00680	NZ_CP007627.1	complement(167595..168596)	64	2.11476	2.56909	0.623174	VWA domain-containing protein
gene2136	FE46_RS10575	NZ_CP007627.1	complement(2400479..2401387)	14	0.509934	0.619486	0.619486	N/A
gene132	FE46_RS00660	NZ_CP007627.1	complement(162532..164337)	169	3.09827	3.76388	0.617088	BatD protein
gene1351	FE46_RS06680	NZ_CP007627.1	complement(1539034..1540011)	15	0.507811	0.616907	0.616907	N/A
gene812	FE46_RS04020	NZ_CP007627.1	complement(939041..939367)	5	0.506258	0.61502	0.61502	N/A
gene910	FE46_RS04505	NZ_CP007627.1	complement(1056819..1057706)	12	0.447423	0.543545	0.613437	N/A
gene1167	FE46_RS05785	NZ_CP007627.1	complement(1332496..1333383)	12	0.447423	0.543545	0.613437	N/A
gene620	FE46_RS03070	NZ_CP007627.1	731730..731984	6	0.779042	0.946408	0.613437	N/A
gene570	FE46_RS02820	NZ_CP007627.1	complement(671710..672723)	12	0.391826	0.476004	0.613437	N/A
gene1734	FE46_RS08580	NZ_CP007627.1	1963995..1964840	33	1.2915	1.56896	0.613437	IS3 family transposase
gene679	FE46_RS03365	NZ_CP007627.1	complement(802872..803765)	12	0.44442	0.539897	0.613437	N/A
gene1416	FE46_RS07000	NZ_CP007627.1	1613470..1613916	6	0.44442	0.539897	0.613437	N/A
gene207	FE46_RS01025	NZ_CP007627.1	complement(246022..246630)	81	4.4037	5.34977	0.613437	hypothetical protein FPN184_contig00088-0002
gene122	FE46_RS13100	NZ_CP007627.1	154096..154284	30	5.25544	6.3845	0.613437	hypothetical protein
gene316	FE46_RS01555	NZ_CP007627.1	369560..370798	120	3.20671	3.89563	0.613437	metallophosphoesterase
gene263	FE46_RS13125	NZ_CP007627.1	complement(306147..306458)	12	1.27343	1.54701	0.613437	hypothetical protein FPSM_00270
gene2424	FE46_RS12010	NZ_CP007627.1	complement(2716925..2718409)	27	0.601987	0.731315	0.613437	N/A
gene551	FE46_RS02725	NZ_CP007627.1	645958..646410	6	0.438533	0.532746	0.613437	N/A
gene65	FE46_RS00330	NZ_CP007627.1	complement(85885..86871)	15	0.50318	0.611282	0.611282	N/A
gene854	FE46_RS04235	NZ_CP007627.1	complement(993525..994448)	14	0.501656	0.609429	0.609429	N/A
gene1042	FE46_RS05160	NZ_CP007627.1	complement(1194264..1196213)	245	4.15988	5.05358	0.596397	amino acid permease
gene1784	FE46_RS08825	NZ_CP007627.1	2018448..2019629	96	2.68908	3.26679	0.594848	tryptophan synthase subunit beta
gene2392	FE46_RS11850	NZ_CP007627.1	2680352..2685610	320	2.01464	2.44745	0.594848	RHS repeat-associated core domain-containing
gene41	FE46_RS00210	NZ_CP007627.1	complement(61735..62397)	29	1.44822	1.75935	0.592989	uroporphyrinogen-III synthase
gene146	FE46_RS00720	NZ_CP007627.1	174608..175357	11	0.485603	0.589928	0.589928	N/A
gene875	FE46_RS04340	NZ_CP007627.1	complement(1018006..1019712)	25	0.484904	0.589079	0.589079	N/A
gene1158	FE46_RS05740	NZ_CP007627.1	complement(1319241..1319879)	23	1.19173	1.44775	0.587877	DUF4159 domain-containing
gene2365	FE46_RS11715	NZ_CP007627.1	complement(2650249..2651139)	13	0.483076	0.586858	0.586858	N/A
gene1870	FE46_RS09250	NZ_CP007627.1	complement(2104590..2105585)	648	21.541	26.1687	0.586293	FKBP-type peptidylprolyl isomerase
gene1763	FE46_RS08720	NZ_CP007627.1	complement(1990562..1993546)	605	6.71059	8.15227	0.583536	translocase subunit
gene1036	FE46_RS05130	NZ_CP007627.1	complement(1187695..1188636)	203	2.30501	2.80017	0.583303	family transcriptional regulator
gene944	FE46_RS04670	NZ_CP007627.1	1087234..1088817	883	18.4567	22.4219	0.580562	HAMP domain-containing histidine kinase
gene1696	FE46_RS08390	NZ_CP007627.1	1926295..1927170	17	0.642532	0.78057	0.579357	N/A
gene474	FE46_RS02340	NZ_CP007627.1	complement(558710..559198)	17	1.15104	1.39832	0.579357	GNAT family N-acetyltransferase
gene1641	FE46_RS08115	NZ_CP007627.1	complement(1868094..1869254)	48	1.36886	1.66294	0.577352	hypothetical protein
gene1125	FE46_RS05575	NZ_CP007627.1	1284961..1286328	590	14.2796	17.3474	0.574488	histidine kinase
gene600	FE46_RS02965	NZ_CP007627.1	complement(701162..703426)	32	0.467769	0.568263	0.568263	N/A
gene682	FE46_RS03380	NZ_CP007627.1	805188..806513	575	14.3573	17.4418	0.567997	trigger factor
gene1786	FE46_RS08835	NZ_CP007627.1	2020849..2021739	335	12.4485	15.1229	0.566119	metalloprotease
gene2138	FE46_RS10585	NZ_CP007627.1	complement(2402597..2403511)	11	0.398035	0.483547	0.562317	N/A
gene2195	FE46_RS10870	NZ_CP007627.1	complement(2463994..2464110)	11	3.11284	3.78159	0.562317	50S ribosomal L36
gene205	FE46_RS01015	NZ_CP007627.1	complement(243704..244345)	11	0.567293	0.689168	0.562317	N/A
gene1434	FE46_RS07090	NZ_CP007627.1	1628341..1629321	11	0.371256	0.451015	0.562317	N/A
gene2528	FE46_RS12520	NZ_CP007627.1	complement(2831943..2832257)	22	2.31239	2.80918	0.562317	hypothetical protein
gene2004	FE46_RS09920	NZ_CP007627.1	complement(2251098..2251478)	11	0.955911	1.16127	0.562317	four helix bundle
gene2356	FE46_RS11670	NZ_CP007627.1	complement(2641715..2642788)	15	0.46242	0.561764	0.561764	N/A
gene1758	FE46_RS08695	NZ_CP007627.1	complement(1985255..1986166)	151	5.48191	6.65962	0.561387	N/A
gene2297	FE46_RS11380	NZ_CP007627.1	complement(2567540..2568817)	96	2.48708	3.0214	0.560856	kynureninase
gene2336	FE46_RS11570	NZ_CP007627.1	complement(2621661..2622959)	18	0.458789	0.557353	0.557353	N/A
gene1943	FE46_RS09615	NZ_CP007627.1	complement(2177924..2178400)	92	6.38586	7.75777	0.553296	Lipocalin-like domain-containing
gene1104	FE46_RS05470	NZ_CP007627.1	1262798..1263664	35	1.33659	1.62374	0.55052	DMT family transporter
gene2096	FE46_RS10375	NZ_CP007627.1	complement(2360392..2361618)	94	2.53649	3.08142	0.549172	peptidoglycan endopeptidase
gene1575	FE46_RS07785	NZ_CP007627.1	complement(1792416..1794326)	139	2.40826	2.92564	0.546588	band 7
gene2483	FE46_RS12295	NZ_CP007627.1	complement(2773669..2774418)	582	25.6928	31.2125	0.545902	Fe-S cluster assembly ATPase
gene1896	FE46_RS09380	NZ_CP007627.1	2125801..2126913	48	1.42789	1.73466	0.545277	glycosyl transferase family 2
gene1116	FE46_RS05530	NZ_CP007627.1	complement(1276196..1277032)	128	5.06331	6.15109	0.545277	ABC transporter permease
gene2510	FE46_RS12430	NZ_CP007627.1	2812528..2813034	8	0.522434	0.634672	0.545277	N/A
gene867	FE46_RS04300	NZ_CP007627.1	1008058..1008510	141	10.3055	12.5195	0.543991	transcriptional repressor
gene1783	FE46_RS08820	NZ_CP007627.1	2017821..2018435	106	5.70664	6.93263	0.541869	N-(5 -phosphoribosyl)anthranilate isomerase
gene393	FE46_RS01945	NZ_CP007627.1	464696..465370	45	2.20728	2.68149	0.541268	tRNA (guanosine(46)-N7)-methyltransferase
gene1020	FE46_RS05050	NZ_CP007627.1	complement(1174221..1174760)	246	15.0831	18.3235	0.54088	hypothetical protein
gene2097	FE46_RS10380	NZ_CP007627.1	2361948..2363063	29	0.860366	1.0452	0.539081	Nif3-like dinuclear metal center hexameric
gene1228	FE46_RS06090	NZ_CP007627.1	1396070..1396273	21	3.40831	4.14053	0.536757	conserved hypothetical protein
gene1571	FE46_RS07765	NZ_CP007627.1	1788242..1788541	4	0.441457	0.536298	0.536298	N/A
gene176	FE46_RS00870	NZ_CP007627.1	complement(212637..213059)	13	1.01754	1.23615	0.531645	DUF4296 domain-containing protein
gene837	FE46_RS04150	NZ_CP007627.1	970926..971741	44	1.7853	2.16885	0.529239	1-acyl-sn-glycerol-3-phosphate acyltransferase
gene1008	FE46_RS04990	NZ_CP007627.1	complement(1156059..1156721)	31	1.5481	1.88068	0.528237	thiamine diphosphokinase
gene1024	FE46_RS12975	NZ_CP007627.1	complement(1177750..1179411)	90	1.79292	2.1781	0.525803	antirepressor
gene1040	FE46_RS05150	NZ_CP007627.1	complement(1192139..1192597)	6	0.432801	0.525782	0.525782	N/A
gene1308	FE46_RS06465	NZ_CP007627.1	complement(1491816..1493150)	41	1.01684	1.23529	0.523977	DEAD DEAH box helicase
gene371	FE46_RS01835	NZ_CP007627.1	441479..442183	41	1.9255	2.33917	0.523977	methyltransferase
gene1586	FE46_RS07840	NZ_CP007627.1	1803395..1804492	909	27.4101	33.2988	0.523581	T9SS type A sorting domain-containing
gene1604	FE46_RS07930	NZ_CP007627.1	1831432..1831911	28	1.93137	2.3463	0.520492	transcriptional regulator
gene471	FE46_RS02325	NZ_CP007627.1	553035..555287	29	0.426174	0.517731	0.517731	N/A
gene851	FE46_RS04220	NZ_CP007627.1	988144..990276	771	11.9678	14.5389	0.515207	family
gene1219	FE46_RS12995	NZ_CP007627.1	1387440..1388376	12	0.424025	0.515121	0.515121	N/A
gene1778	FE46_RS08795	NZ_CP007627.1	2012916..2013482	2989	174.539	212.036	0.514901	family
gene2141	FE46_RS10600	NZ_CP007627.1	complement(2405681..2406697)	13	0.423226	0.51415	0.51415	N/A
gene303	FE46_RS01490	NZ_CP007627.1	complement(352903..354000)	14	0.422158	0.512853	0.512853	N/A
gene515	FE46_RS02545	NZ_CP007627.1	603777..604472	25	1.18927	1.44477	0.511197	alpha beta hydrolase
gene1618	FE46_RS08000	NZ_CP007627.1	1844647..1844865	10	1.51184	1.83664	0.511197	DUF2007 domain-containing
gene694	FE46_RS03440	NZ_CP007627.1	816376..817617	85	2.26593	2.75274	0.511197	hypothetical protein
gene1540	FE46_RS07610	NZ_CP007627.1	1756942..1757523	15	0.853332	1.03666	0.511197	tRNA-(ms[2]io[6]A)-hydroxylase
gene1915	FE46_RS09475	NZ_CP007627.1	complement(2145903..2146124)	5	0.745704	0.905909	0.511197	N/A
gene999	FE46_RS04945	NZ_CP007627.1	1142578..1144380	117	2.14852	2.6101	0.509022	T9SS type A sorting domain-containing
gene2438	FE46_RS12070	NZ_CP007627.1	complement(2730323..2731435)	14	0.416469	0.505941	0.505941	N/A
gene2557	FE46_RS12660	NZ_CP007627.1	complement(2863380..2863778)	5	0.414903	0.504039	0.504039	N/A
gene2131	FE46_RS10550	NZ_CP007627.1	complement(2395467..2396027)	7	0.413128	0.501883	0.501883	N/A
gene1212	FE46_RS06010	NZ_CP007627.1	1376938..1377903	12	0.411295	0.499656	0.499656	N/A
gene410	FE46_RS02030	NZ_CP007627.1	484505..485761	39	1.02726	1.24795	0.498417	tyrosine-type recombinase integrase
gene1242	FE46_RS06155	NZ_CP007627.1	1411721..1413907	27	0.408756	0.496572	0.496572	N/A
gene1453	FE46_RS07175	NZ_CP007627.1	complement(1649386..1650114)	9	0.408756	0.496572	0.496572	N/A
gene1715	FE46_RS08485	NZ_CP007627.1	complement(1945411..1946625)	15	0.408756	0.496572	0.496572	N/A
gene356	FE46_RS01760	NZ_CP007627.1	complement(422847..423101)	169	21.943	26.6572	0.49367	hypothetical protein
gene1003	FE46_RS04965	NZ_CP007627.1	1149562..1151218	53	1.05902	1.28653	0.492608	[Flavobacterium psychrophilum]
gene1578	FE46_RS07800	NZ_CP007627.1	1796675..1797601	12	0.428599	0.520678	0.490749	N/A
gene549	FE46_RS02715	NZ_CP007627.1	complement(644497..644988)	6	0.403772	0.490516	0.490516	N/A
gene1139	FE46_RS05645	NZ_CP007627.1	complement(1297757..1298734)	31	1.04948	1.27494	0.487603	glycosyltransferase
gene4	FE46_RS00025	NZ_CP007627.1	7106..7669	19	1.11538	1.35501	0.485637	OmpH family outer membrane protein
gene328	FE46_RS01615	NZ_CP007627.1	383223..386630	95	0.92294	1.12122	0.485637	hypothetical protein
gene1137	FE46_RS05635	NZ_CP007627.1	1295513..1296793	26	0.672007	0.816378	0.483314	N/A
gene2142	FE46_RS13085	NZ_CP007627.1	complement(2406713..2407711)	12	0.397709	0.483151	0.483151	N/A
gene788	FE46_RS03905	NZ_CP007627.1	complement(910089..910592)	33	2.16787	2.63361	0.481986	lipo
gene1479	FE46_RS07305	NZ_CP007627.1	complement(1685936..1686631)	320	15.2227	18.493	0.477615	DUF541 domain-containing
gene1366	FE46_RS06755	NZ_CP007627.1	1557141..1557983	10	0.392755	0.477133	0.477133	N/A
gene1905	FE46_RS09425	NZ_CP007627.1	complement(2134873..2135367)	7	0.468212	0.568801	0.477117	N/A
gene331	FE46_RS01635	NZ_CP007627.1	389091..389951	21	0.807543	0.981033	0.477117	N/A
gene203	FE46_RS01005	NZ_CP007627.1	complement(242338..242961)	42	2.22851	2.70727	0.477117	nicotinamide mononucleotide transporter
gene2386	FE46_RS11820	NZ_CP007627.1	complement(2671341..2671751)	7	0.563905	0.685052	0.477117	N/A
gene1850	FE46_RS09150	NZ_CP007627.1	2088354..2089115	9	0.391054	0.475067	0.475067	N/A
gene1935	FE46_RS09575	NZ_CP007627.1	complement(2170170..2171372)	58	1.59629	1.93923	0.474391	IS256 family transposase
gene801	FE46_RS03965	NZ_CP007627.1	925201..926247	88	2.78282	3.38067	0.47353	Glycine D-amino acid oxidases (Deaminating) family Fjo30
gene2570	FE46_RS12725	NZ_CP007627.1	complement(2875853..2877211)	30	0.730889	0.88791	0.471874	N/A
gene2382	FE46_RS11800	NZ_CP007627.1	complement(2666055..2667251)	14	0.387243	0.470437	0.470437	N/A
gene796	FE46_RS03940	NZ_CP007627.1	919119..920264	23	0.664497	0.807255	0.470301	N/A
gene2325	FE46_RS11515	NZ_CP007627.1	complement(2605739..2606221)	16	1.09679	1.33242	0.46738	family transcriptional regulator
gene160	FE46_RS00790	NZ_CP007627.1	190577..191008	5	0.383209	0.465536	0.465536	N/A
gene718	FE46_RS03560	NZ_CP007627.1	842840..843658	25	1.01066	1.22779	0.464725	zinc-dependent peptidase
gene1361	FE46_RS06730	NZ_CP007627.1	complement(1549883..1551325)	127	2.91398	3.54001	0.463729	inorganic phosphate transporter
gene1951	FE46_RS09655	NZ_CP007627.1	complement(2188195..2191149)	115	1.28852	1.56534	0.46108	histidine kinase
gene2003	FE46_RS09915	NZ_CP007627.1	complement(2250460..2251077)	18	0.964348	1.17152	0.460077	family
gene1570	FE46_RS07760	NZ_CP007627.1	1787532..1787966	9	0.685019	0.832186	0.460077	N/A
gene1682	FE46_RS08320	NZ_CP007627.1	complement(1911333..1911983)	18	0.915464	1.11214	0.460077	phosphatidylserine decarboxylase family
gene1544	FE46_RS07630	NZ_CP007627.1	complement(1759719..1760267)	54	3.25665	3.9563	0.460077	DUF1697 domain-containing
gene1114	FE46_RS05520	NZ_CP007627.1	complement(1271472..1273868)	110	1.51941	1.84583	0.459034	T9SS type B sorting domain-containing
gene1270	FE46_RS06280	NZ_CP007627.1	1448795..1449208	74	5.91808	7.1895	0.458528	DUF1456 family
gene245	FE46_RS01215	NZ_CP007627.1	286720..287490	215	9.23281	11.2163	0.457947	DUF3108 domain-containing protein
gene1018	FE46_RS05040	NZ_CP007627.1	complement(1172482..1173273)	9	0.376242	0.457072	0.457072	N/A
gene716	FE46_RS03550	NZ_CP007627.1	842220..842669	38	2.79589	3.39655	0.45707	glutamyl-tRNA amidotransferase
gene2426	FE46_RS12020	NZ_CP007627.1	complement(2720189..2722354)	67	1.02416	1.24418	0.456669	S9 family peptidase
[truncated: 192 more rows]

## Sheet: OMV
Additional file S1: Transcripts identified in the OMVs
Gene name	RefSeq	CHR	Position	Gene length	TPM	RPKM	OMV/Cell	Gene description
gene782	FE46_RS03875	NZ_CP007627.1	complement(904889..905050)	162	215.254	258.633	258.633	hypothetical protein IA03_02225
gene761	FE46_RS03770	NZ_CP007627.1	885510..885785	276	151.851	182.452	250.393	HU family DNA-binding protein
gene298	FE46_RS01465	NZ_CP007627.1	346260..346460	201	197.109	236.831	236.831	cold shock domain-containing protein
gene1827	FE46_RS09040	NZ_CP007627.1	complement(2063108..2063359)	252	188.402	226.369	236.373	30S ribosomal protein S20
gene1464	FE46_RS07230	NZ_CP007627.1	complement(1665159..1665551)	393	111.226	133.64	133.64	hypothetical protein
gene805	FE46_RS03985	NZ_CP007627.1	complement(930582..931028)	447	74.3492	89.3321	124.096	KTSC domain-containing protein
gene1103	FE46_RS05465	NZ_CP007627.1	complement(1262525..1262707)	183	144.928	174.134	72.0234	hypothetical protein
rrf_1	rrf_1	NZ_CP007627.1	597481..597590	110	59.5326	71.5297	71.5297	hypothetical protein
gene1402	FE46_RS06935	NZ_CP007627.1	complement(1599057..1599485)	429	56.4796	67.8615	67.8615	hypothetical protein
gene670	FE46_RS03320	NZ_CP007627.1	complement(793795..794295)	501	106.202	127.604	61.131	family outer membrane
rrf_6	rrf_6	NZ_CP007627.1	complement(2536156..2536265)	110	41.6728	50.0708	50.0708	hypothetical protein
gene2013	FE46_RS09965	NZ_CP007627.1	complement(2260847..2261098)	252	940.71	1130.28	43.7124	type B 50S ribosomal L31
gene872	FE46_RS04325	NZ_CP007627.1	complement(1015157..1015387)	231	34.0186	40.8741	40.8741	DUF3820 family protein
gene1863	FE46_RS09215	NZ_CP007627.1	complement(2099661..2099843)	183	123.457	148.336	37.4937	50S ribosomal L33
gene2470	FE46_RS12230	NZ_CP007627.1	complement(2762141..2762335)	195	97.3892	117.015	33.3703	50S ribosomal L32
gene369	FE46_RS01825	NZ_CP007627.1	440266..440808	543	273.762	328.931	30.6245	30S ribosomal S16
gene363	FE46_RS01795	NZ_CP007627.1	430956..431486	531	33.6062	40.3786	29.6146	Inorganic pyrophosphatase
gene482	FE46_RS02380	NZ_CP007627.1	568616..569380	765	24.6107	29.5703	29.5703	hypothetical protein IA03_02225
gene2515	FE46_RS12455	NZ_CP007627.1	complement(2818030..2818437)	408	363.944	437.286	28.9913	copper resistance
gene785	FE46_RS03890	NZ_CP007627.1	complement(908354..908629)	276	23.7268	28.5082	28.5082	co-chaperone GroES
gene1667	FE46_RS08245	NZ_CP007627.1	1891426..1892289	864	21.6012	25.9543	25.9543	Putative membrane spanning protein
gene1446	N/A	NZ_CP007627.1	complement(1637469..1638984)	1516	10586.1	12719.4	25.8423	N/A
gene1110	FE46_RS05500	NZ_CP007627.1	complement(1268943..1269239)	297	19.293	23.1809	23.1809	integration host factor subunit beta
gene2299	FE46_RS11385	NZ_CP007627.1	complement(2570186..2570446)	261	186.296	223.839	23.0551	50S ribosomal L27
gene1186	FE46_RS05880	NZ_CP007627.1	1353774..1354910	1137	11.807	14.1864	22.2789	3,4-dihydroxy-2-butanone-4-phosphate synthase
gene1171	FE46_RS05805	NZ_CP007627.1	1338695..1338862	168	600.287	721.257	21.3655	hypothetical protein SAMN05660845_2267
gene920	FE46_RS04555	NZ_CP007627.1	1066441..1066782	342	169.938	204.184	21.1722	30S ribosomal S6
gene1989	FE46_RS09845	NZ_CP007627.1	2230887..2231525	639	907.476	1090.35	19.5069	hypothetical protein
gene921	FE46_RS04560	NZ_CP007627.1	1066788..1067084	297	116.309	139.748	19.1091	30S ribosomal S18
gene1130	FE46_RS05600	NZ_CP007627.1	complement(1288247..1289020)	774	15.6523	18.8066	18.8066	CDP-alcohol phosphatidyltransferase family protein
gene819	FE46_RS04055	NZ_CP007627.1	complement(947234..947806)	573	15.4286	18.5378	18.5378	hypothetical protein
gene476	FE46_RS02350	NZ_CP007627.1	complement(560667..561911)	1245	15.1222	18.1697	18.1697	threonine ammonia-lyase IlvA
gene500	FE46_RS02470	NZ_CP007627.1	586059..586523	465	34.5033	41.4564	16.5265	ribosome assembly cofactor
gene1588	FE46_RS07850	NZ_CP007627.1	complement(1808487..1809059)	573	10	12.0152	15.5606	pentapeptide repeat-containing protein
gene873	FE46_RS04330	NZ_CP007627.1	complement(1015467..1015871)	405	12.9355	15.5422	15.5422	OsmC family protein
gene721	FE46_RS12965	NZ_CP007627.1	845790..846374	585	9.51504	11.4325	15.116	hypothetical protein ATB90_04040
gene1986	FE46_RS09830	NZ_CP007627.1	complement(2225659..2226303)	645	13.7063	16.4685	14.6714	PAS domain-containing
gene1619	FE46_RS08005	NZ_CP007627.1	complement(1844925..1845317)	393	27.0775	32.5342	14.4491	orotate phosphoribosyltransferase
gene2578	FE46_RS12765	NZ_CP007627.1	2884372..2884548	177	79.545	95.5749	14.0194	twin-arginine translocase family subunit
gene866	FE46_RS04295	NZ_CP007627.1	1007078..1007545	468	880.141	1057.51	13.3309	muramidase
gene2482	FE46_RS12290	NZ_CP007627.1	complement(2772351..2773667)	1317	79.4333	95.4408	13.1303	Fe-S cluster assembly
gene1864	FE46_RS09220	NZ_CP007627.1	complement(2099870..2100106)	237	36.6113	43.9892	12.9598	50S ribosomal L28
gene2226	FE46_RS11025	NZ_CP007627.1	complement(2485934..2486728)	795	40.9801	49.2385	12.639	rhomboid family intramembrane serine protease
gene835	FE46_RS04140	NZ_CP007627.1	complement(969610..970041)	432	7.57938	9.10679	12.2262	N/A
gene1676	FE46_RS08290	NZ_CP007627.1	complement(1904435..1905313)	879	4.65628	5.59461	12.2262	N/A
gene758	FE46_RS03755	NZ_CP007627.1	881839..882372	534	9.81062	11.7877	11.7877	N/A
gene2586	FE46_RS12805	NZ_CP007627.1	2892712..2893395	684	16.2757	19.5556	11.4673	lysine transporter
gene1717	FE46_RS08495	NZ_CP007627.1	complement(1947815..1948045)	231	9.9221	11.9216	11.4111	hypothetical protein
gene2588	FE46_RS12815	NZ_CP007627.1	complement(2893617..2893976)	360	10.4595	12.5674	11.2481	dihydroneopterin aldolase
gene2473	FE46_RS12245	NZ_CP007627.1	2764100..2764696	597	4.38766	5.27187	11.1782	N/A
gene2441	FE46_RS12085	NZ_CP007627.1	2733560..2733937	378	99.1816	119.169	10.6659	DUF3127 domain-containing
gene1841	FE46_RS09110	NZ_CP007627.1	complement(2077936..2079372)	1437	6.37997	7.66567	10.5333	N/A
gene1677	FE46_RS08295	NZ_CP007627.1	complement(1905300..1906385)	1086	8.74351	10.5055	10.5055	N/A
gene874	FE46_RS04335	NZ_CP007627.1	complement(1015871..1017787)	1917	5.6365	6.77237	10.412	N/A
gene2471	FE46_RS12235	NZ_CP007627.1	complement(2762345..2762908)	564	50.798	61.0348	10.0686	DNA-binding
gene1668	FE46_RS08250	NZ_CP007627.1	complement(1892746..1893039)	294	6.68223	8.02884	9.78096	N/A
gene839	FE46_RS04160	NZ_CP007627.1	complement(972369..972863)	495	4.63031	5.56342	9.78096	N/A
gene493	FE46_RS02435	NZ_CP007627.1	580723..580926	204	65.8069	79.0683	9.54808	N/A
gene1294	FE46_RS13015	NZ_CP007627.1	1468920..1469300	381	10.7424	12.9073	9.40477	hypothetical protein
gene691	FE46_RS03425	NZ_CP007627.1	813919..814479	561	3.79374	4.55826	9.08232	N/A
gene120	FE46_RS00605	NZ_CP007627.1	153154..153435	282	27.8663	33.482	9.02858	F0F1 ATP synthase subunit epsilon
gene1128	FE46_RS05590	NZ_CP007627.1	1286973..1287323	351	14.4591	17.3729	8.91794	2TM domain-containing
gene1694	FE46_RS13070	NZ_CP007627.1	complement(1925388..1925918)	531	7.39953	8.89069	8.89069	N/A
gene947	FE46_RS04685	NZ_CP007627.1	complement(1090026..1090256)	231	17.0093	20.437	8.38368	type II toxin-antitoxin system family toxin
gene1801	FE46_RS08910	NZ_CP007627.1	2036854..2037138	285	6.89325	8.28238	8.28238	N/A
gene124	FE46_RS00620	NZ_CP007627.1	155665..156006	342	83.7721	100.654	8.22917	T9SS type A sorting domain-containing protein
gene300	FE46_RS01475	NZ_CP007627.1	347109..347696	588	14.4782	17.3958	8.20339	Gram-negative bacterial tonB protein
gene870	FE46_RS04315	NZ_CP007627.1	complement(1010843..1012744)	1902	13.9442	16.7542	8.16761	membrane insertase
gene767	FE46_RS03800	NZ_CP007627.1	complement(888866..889657)	792	14.4697	17.3857	8.1508	tetratricopeptide repeat
gene1842	FE46_RS13265	NZ_CP007627.1	complement(2079497..2079729)	233	3.51319	4.22117	8.1508	N/A
gene1497	FE46_RS07395	NZ_CP007627.1	complement(1709576..1710055)	480	42.9751	51.6355	8.1079	winged helix-turn-helix transcriptional regulator
gene1574	FE46_RS07780	NZ_CP007627.1	1791170..1792297	1128	3.04788	3.66209	7.90001	N/A
gene568	FE46_RS02810	NZ_CP007627.1	669088..670227	1140	6.1752	7.41963	7.78854	N/A
gene1684	FE46_RS08330	NZ_CP007627.1	complement(1912781..1913386)	606	3.78219	4.54438	7.60741	N/A
gene1552	FE46_RS07670	NZ_CP007627.1	complement(1766344..1766577)	234	6.29672	7.56564	7.56564	N/A
gene1414	FE46_RS06990	NZ_CP007627.1	complement(1612134..1612316)	183	8.05154	9.67409	7.33572	hypothetical protein
gene1862	FE46_RS09210	NZ_CP007627.1	complement(2099499..2099651)	153	22.4706	26.9989	7.33572	DUF4295 domain-containing
gene635	FE46_RS03145	NZ_CP007627.1	complement(751376..751807)	432	17.0536	20.4903	6.87724	GNAT family N-acetyltransferase
gene2342	FE46_RS11600	NZ_CP007627.1	complement(2631522..2631893)	372	11.4424	13.7483	6.69224	3-hydroxyacyl-ACP dehydratase
gene898	FE46_RS04445	NZ_CP007627.1	1043027..1043377	351	52.7059	63.3272	6.57886	50S ribosomal L19
gene2246	FE46_RS13090	NZ_CP007627.1	2506592..2507170	579	3.39305	4.07682	6.52064	N/A
gene986	FE46_RS04880	NZ_CP007627.1	1129153..1129419	267	39.2425	47.1506	6.38757	hypothetical protein
gene2397	FE46_RS11875	NZ_CP007627.1	2691729..2692664	936	2.44872	2.94219	6.22425	N/A
gene1046	FE46_RS05180	NZ_CP007627.1	1201836..1202147	312	112.816	135.551	6.18502	thioredoxin family
gene766	FE46_RS03795	NZ_CP007627.1	complement(888226..888795)	570	12.9248	15.5295	5.94788	6,7-dimethyl-8-ribityllumazine synthase
gene750	FE46_RS03715	NZ_CP007627.1	complement(872278..872889)	612	57.7816	69.4259	5.80409	porin family
gene1826	N/A	NZ_CP007627.1	complement(2060451..2061966)	1516	36766.9	44176.2	5.72185	N/A
gene815	FE46_RS04035	NZ_CP007627.1	943156..943686	531	77.6951	93.3523	5.60182	DUF4136 domain-containing
gene1419	FE46_RS07015	NZ_CP007627.1	complement(1615265..1615405)	141	4.64439	5.58033	5.58033	N/A
gene503	N/A	NZ_CP007627.1	592299..593814	1516	37213.8	44713.1	5.52142	N/A
gene1292	FE46_RS06385	NZ_CP007627.1	complement(1467604..1468326)	723	14.0392	16.8683	5.51291	DUF4369 domain-containing
gene1257	N/A	NZ_CP007627.1	1435455..1436970	1516	37150.1	44636.6	5.50463	N/A
gene1950	FE46_RS09650	NZ_CP007627.1	complement(2187816..2188067)	252	4.54763	5.46407	5.46407	N/A
gene565	FE46_RS02795	NZ_CP007627.1	complement(664611..665828)	1218	5.51092	6.62149	5.41918	site-specific integrase
gene135	FE46_RS00675	NZ_CP007627.1	complement(167187..167540)	354	14.3366	17.2257	5.41446	GxxExxY protein
gene628	FE46_RS03110	NZ_CP007627.1	complement(742322..742834)	513	4.46785	5.36821	5.36821	N/A
gene1061	FE46_RS05255	NZ_CP007627.1	1220307..1221338	1032	9.20102	11.0552	5.35185	type IX secretion system
gene669	FE46_RS03315	NZ_CP007627.1	complement(792951..793730)	780	7.55606	9.07877	5.33507	glutamate racemase
gene2269	FE46_RS11240	NZ_CP007627.1	2535534..2535869	336	4.38521	5.26893	5.26893	N/A
gene1981	FE46_RS09805	NZ_CP007627.1	complement(2221352..2221804)	453	37.5857	45.16	5.2434	thioredoxin-dependent thiol peroxidase
gene134	FE46_RS00670	NZ_CP007627.1	complement(165977..167017)	1041	7.077	8.50317	5.2398	BatB protein
gene2390	FE46_RS11840	NZ_CP007627.1	2677824..2679308	1485	5.40203	6.49065	5.20943	tetratricopeptide repeat
gene1340	FE46_RS06625	NZ_CP007627.1	complement(1524373..1525392)	1020	2.72858	3.27844	5.19614	N/A
gene1035	FE46_RS05125	NZ_CP007627.1	1187271..1187468	198	56.2252	67.5558	5.19614	hypothetical protein
gene221	FE46_RS01095	NZ_CP007627.1	260280..260759	480	12.2786	14.753	5.17816	IPExxxVDY family protein
gene940	FE46_RS13205	NZ_CP007627.1	complement(1082425..1082562)	138	2.37268	2.85082	4.89048	N/A
gene2169	FE46_RS10740	NZ_CP007627.1	complement(2434753..2436036)	1284	2.42257	2.91077	4.89048	N/A
gene121	FE46_RS00610	NZ_CP007627.1	153500..154015	516	3.80732	4.57457	4.89048	N/A
gene2315	FE46_RS11465	NZ_CP007627.1	complement(2585711..2586076)	366	6.26231	7.5243	4.89048	NADH-quinone oxidoreductase subunit A
gene2060	FE46_RS10195	NZ_CP007627.1	complement(2323981..2324178)	198	5.78789	6.95427	4.89048	pre translocase subunit
gene2309	FE46_RS11435	NZ_CP007627.1	complement(2579781..2580752)	972	1.85274	2.2261	4.89048	N/A
gene1762	FE46_RS08715	NZ_CP007627.1	complement(1989895..1990233)	339	3.86347	4.64204	4.89048	N/A
gene553	FE46_RS02735	NZ_CP007627.1	646676..646918	243	4.04234	4.85695	4.85695	N/A
gene1945	FE46_RS09625	NZ_CP007627.1	complement(2180522..2182624)	2103	2.88038	3.46084	4.63969	N/A
gene915	FE46_RS04530	NZ_CP007627.1	1060341..1061198	858	2.67133	3.20966	4.56445	N/A
gene1518	FE46_RS07500	NZ_CP007627.1	complement(1727940..1728626)	687	25.0219	30.0643	4.54425	type 1 glutamine amidotransferase domain-containing
gene1295	FE46_RS06400	NZ_CP007627.1	1469472..1470554	1083	3.77919	4.54078	4.54078	N/A
gene1420	FE46_RS07020	NZ_CP007627.1	complement(1615398..1615949)	552	3.26243	3.91988	4.48294	N/A
gene1934	FE46_RS09570	NZ_CP007627.1	2167649..2170111	2463	12.8951	15.4937	4.43343	N/A
gene2098	FE46_RS10385	NZ_CP007627.1	2363066..2363845	780	24.977	30.0104	4.40884	zinc ribbon domain
gene1291	FE46_RS06380	NZ_CP007627.1	complement(1467179..1467595)	417	6.28162	7.54749	4.34709	TSA family
gene881	FE46_RS04370	NZ_CP007627.1	complement(1025356..1025793)	438	2.99022	3.59281	4.34709	N/A
gene941	FE46_RS04655	NZ_CP007627.1	1083250..1085493	2244	5.17992	6.22378	4.3403	T9SS type A sorting domain-containing
gene1188	FE46_RS05890	NZ_CP007627.1	1355382..1356632	1251	3.53341	4.24547	4.24547	N/A
gene1541	FE46_RS07615	NZ_CP007627.1	1757541..1757819	279	3.52075	4.23025	4.23025	N/A
gene569	FE46_RS02815	NZ_CP007627.1	670591..671520	930	3.52075	4.23025	4.23025	N/A
gene638	FE46_RS03160	NZ_CP007627.1	753021..753740	720	4.32025	5.19087	4.2236	hypothetical protein
gene413	FE46_RS02045	NZ_CP007627.1	486813..488204	1392	3.41072	4.09805	4.09805	N/A
gene567	FE46_RS02805	NZ_CP007627.1	667885..669057	1173	10.7468	12.9125	4.09312	Hypothetical transmembrane
gene783	FE46_RS03880	NZ_CP007627.1	905205..905720	516	19.3539	23.2541	4.08657	DUF2892 domain-containing
gene1485	FE46_RS07335	NZ_CP007627.1	complement(1692351..1692653)	303	5.40312	6.49197	4.0754	helix-turn-helix transcriptional regulator
gene2345	FE46_RS11615	NZ_CP007627.1	complement(2633126..2633758)	633	2.58633	3.10753	4.0754	N/A
gene1310	FE46_RS06475	NZ_CP007627.1	complement(1494858..1495373)	516	1.58638	1.90607	4.0754	N/A
gene2068	FE46_RS10235	NZ_CP007627.1	complement(2327418..2327615)	198	38.8616	46.693	4.0325	30S ribosomal S21
gene1141	FE46_RS05655	NZ_CP007627.1	1299740..1300924	1185	3.31574	3.98393	3.98393	N/A
gene2565	FE46_RS12700	NZ_CP007627.1	complement(2870934..2871866)	933	2.98301	3.58415	3.95896	N/A
gene2302	FE46_RS11400	NZ_CP007627.1	complement(2572929..2574368)	1440	4.32025	5.19087	3.95401	NADH-quinone oxidoreductase subunit M
gene804	FE46_RS03980	NZ_CP007627.1	complement(929087..930241)	1155	3.26012	3.9171	3.9171	N/A
gene2344	FE46_RS11610	NZ_CP007627.1	complement(2632528..2633076)	549	2.38564	2.8664	3.91238	N/A
gene2514	FE46_RS12450	NZ_CP007627.1	2817270..2817824	555	3.24479	3.89869	3.89869	N/A
gene1932	FE46_RS09560	NZ_CP007627.1	complement(2161125..2162930)	1806	2.62886	3.15863	3.83308	N/A
gene409	FE46_RS02025	NZ_CP007627.1	complement(483389..483754)	366	3.13115	3.76215	3.80371	N/A
gene277	FE46_RS01360	NZ_CP007627.1	complement(321651..322943)	1293	3.1654	3.8033	3.8033	N/A
gene1733	FE46_RS08575	NZ_CP007627.1	1963633..1963944	312	3.14836	3.78282	3.78282	N/A
gene742	FE46_RS03675	NZ_CP007627.1	complement(864518..865132)	615	2.66203	3.19848	3.76191	N/A
gene1513	FE46_RS07475	NZ_CP007627.1	1723775..1724536	762	2.14849	2.58145	3.76191	N/A
gene1470	FE46_RS13035	NZ_CP007627.1	1671322..1672116	795	2.67709	3.21659	3.73978	N/A
gene1081	FE46_RS05355	NZ_CP007627.1	1243178..1244518	1341	3.54044	4.25391	3.73221	sigma-54-dependent Fis family transcriptional regulator
gene1047	FE46_RS05185	NZ_CP007627.1	1202187..1202444	258	265.243	318.695	3.68993	hypothetical protein
gene1937	FE46_RS09585	NZ_CP007627.1	2172899..2173672	774	3.17276	3.81214	3.66786	sulfite exporter family
gene1410	FE46_RS06975	NZ_CP007627.1	complement(1608378..1609034)	657	22.6758	27.2455	3.64782	fructose-6-phosphate aldolase
gene624	FE46_RS03095	NZ_CP007627.1	complement(736555..738819)	2265	1.66244	1.99746	3.62842	N/A
gene1671	FE46_RS08265	NZ_CP007627.1	1898223..1899152	930	2.99263	3.59571	3.59571	N/A
gene871	FE46_RS04320	NZ_CP007627.1	complement(1012838..1014451)	1614	3.8545	4.63126	3.57381	CTP synthase
gene672	FE46_RS03330	NZ_CP007627.1	complement(795342..798011)	2670	9.81062	11.7877	3.57295	outer membrane assembly factor
gene1954	N/A	NZ_CP007627.1	complement(2192377..2195268)	2892	46439.2	55687.6	3.56816	N/A
gene1443	N/A	NZ_CP007627.1	complement(1633955..1636846)	2892	45414.8	54566.9	3.54244	N/A
gene2271	N/A	NZ_CP007627.1	complement(2536418..2539309)	2892	45486.9	54653.4	3.53439	N/A
gene506	N/A	NZ_CP007627.1	594437..597328	2892	44972.3	54035.1	3.5335	N/A
gene2524	FE46_RS12500	NZ_CP007627.1	complement(2828398..2829612)	1215	14.9566	17.9707	3.52496	membrane
gene2521	FE46_RS12485	NZ_CP007627.1	complement(2825425..2827530)	2106	4.89745	5.88438	3.42334	peptidylprolyl isomerase
gene577	FE46_RS02855	NZ_CP007627.1	678637..679098	462	2.83489	3.40617	3.40617	N/A
gene198	FE46_RS00980	NZ_CP007627.1	237515..238180	666	6.14544	7.38388	3.39617	DUF4271 domain-containing protein
gene786	FE46_RS03895	NZ_CP007627.1	complement(908769..909143)	375	44.5304	53.5042	3.37047	pre translocase subunit
gene236	FE46_RS01170	NZ_CP007627.1	275062..275442	381	18.477	22.2005	3.33795	molecular chaperone DnaK
gene158	FE46_RS00780	NZ_CP007627.1	188861..190204	1344	9.62311	11.5624	3.33059	Uncharacterised protein
gene602	FE46_RS13165	NZ_CP007627.1	704152..704331	180	2.72858	3.27844	3.27844	N/A
gene1418	FE46_RS07010	NZ_CP007627.1	1614967..1615206	240	2.72858	3.27844	3.27844	N/A
gene757	FE46_RS03750	NZ_CP007627.1	complement(881109..881393)	285	2.29775	2.76079	3.26032	N/A
gene1109	FE46_RS05495	NZ_CP007627.1	complement(1267014..1268558)	1545	16.7423	20.1163	3.26032	ribonuclease E G
gene615	FE46_RS03040	NZ_CP007627.1	724638..724892	255	2.56807	3.08559	3.26032	N/A
gene1335	FE46_RS06600	NZ_CP007627.1	complement(1520213..1520575)	363	2.70603	3.25135	3.25135	N/A
gene659	FE46_RS03265	NZ_CP007627.1	complement(783230..783580)	351	61.5679	73.9751	3.21166	cytochrome C oxidase subunit IV
gene578	FE46_RS02860	NZ_CP007627.1	679363..680037	675	2.66794	3.20559	3.20559	N/A
gene1185	FE46_RS05875	NZ_CP007627.1	1352333..1353787	1455	14.8525	17.8455	3.19576	family permease
gene253	FE46_RS13115	NZ_CP007627.1	complement(299228..299434)	207	50.6171	60.8175	3.19378	hypothetical protein IA03_01080
gene1135	FE46_RS05625	NZ_CP007627.1	complement(1293440..1294333)	894	2.01439	2.42033	3.16443	N/A
gene977	FE46_RS04835	NZ_CP007627.1	1120954..1122231	1278	3.71496	4.46361	3.15164	glycosyl transferase family 1
gene671	FE46_RS03325	NZ_CP007627.1	complement(794339..795301)	963	7.99023	9.60043	3.14867	family outer membrane
gene1326	FE46_RS06555	NZ_CP007627.1	complement(1508705..1510732)	2028	1.29163	1.55193	3.12991	N/A
gene1888	FE46_RS09340	NZ_CP007627.1	complement(2117002..2118864)	1863	1.49391	1.79496	3.07919	N/A
gene1867	FE46_RS09235	NZ_CP007627.1	complement(2102687..2103040)	354	2.31235	2.77834	3.05655	N/A
gene1336	FE46_RS06605	NZ_CP007627.1	complement(1520578..1521507)	930	2.64056	3.17269	3.05655	UDP-3-O-(3-hydroxymyristoyl)glucosamine N-acyltransferase
gene1123	FE46_RS05565	NZ_CP007627.1	1282007..1284160	2154	8.58856	10.3193	3.05317	N/A
gene852	FE46_RS04225	NZ_CP007627.1	complement(990790..992064)	1275	4.23732	5.09123	3.04502	peptidase T
gene668	FE46_RS03310	NZ_CP007627.1	792056..792574	519	2.52354	3.03209	3.03209	N/A
gene1630	FE46_RS08060	NZ_CP007627.1	complement(1853270..1853725)	456	2.51316	3.01962	3.01962	N/A
gene1681	FE46_RS08315	NZ_CP007627.1	complement(1911063..1911332)	270	4.8508	5.82834	3.00953	acyl- -binding
gene2282	FE46_RS11305	NZ_CP007627.1	2549511..2550011	501	5.22841	6.28205	3.00953	T9SS type A sorting domain-containing
gene137	FE46_RS00685	NZ_CP007627.1	complement(168598..170184)	1587	7.22119	8.67641	3.00293	hypothetical protein
gene248	FE46_RS01230	NZ_CP007627.1	289679..290308	630	3.6381	4.37126	2.97681	aminoacyl-tRNA hydrolase
gene364	FE46_RS01800	NZ_CP007627.1	431694..432623	930	2.46452	2.96117	2.96117	N/A
gene2490	FE46_RS12330	NZ_CP007627.1	complement(2781806..2782135)	330	1.48832	1.78824	2.93429	N/A
gene2320	FE46_RS11490	NZ_CP007627.1	complement(2595537..2596643)	1107	1.33101	1.59924	2.93429	N/A
gene84	FE46_RS00425	NZ_CP007627.1	complement(107214..107549)	336	2.43623	2.92718	2.92718	N/A
gene502	FE46_RS02480	NZ_CP007627.1	587834..590737	2904	30.8374	37.0518	2.90771	translation initiation factor IF-2
gene901	FE46_RS04460	NZ_CP007627.1	complement(1046606..1047709)	1104	1.9278	2.31629	2.88983	N/A
gene82	FE46_RS00415	NZ_CP007627.1	complement(103731..105065)	1335	32.6203	39.194	2.85905	RIP metalloprotease RseP
gene2554	FE46_RS12645	NZ_CP007627.1	complement(2860319..2860516)	198	502.72	604.028	2.8184	ATP synthase F0 subunit C
gene2466	FE46_RS12210	NZ_CP007627.1	complement(2758300..2758695)	396	4.96105	5.96081	2.79456	ribonuclease P component
gene412	FE46_RS02040	NZ_CP007627.1	486526..486810	285	2.29775	2.76079	2.76079	N/A
gene133	FE46_RS00665	NZ_CP007627.1	complement(164359..165072)	714	2.29292	2.75499	2.75499	N/A
gene639	FE46_RS03165	NZ_CP007627.1	753754..754257	504	2.27381	2.73204	2.73204	N/A
gene161	FE46_RS00795	NZ_CP007627.1	191107..192402	1296	2.27381	2.73204	2.73204	N/A
gene143	FE46_RS00705	NZ_CP007627.1	complement(171360..172226)	867	10.3856	12.4785	2.71693	DUF58 domain-containing protein
gene1052	FE46_RS05210	NZ_CP007627.1	complement(1208563..1209030)	468	1.74909	2.10157	2.71693	N/A
gene1898	FE46_RS09390	NZ_CP007627.1	2127621..2128442	822	14.7383	17.7084	2.70071	energy transducer
gene1112	FE46_RS05510	NZ_CP007627.1	1270441..1270863	423	6.19252	7.44044	2.6982	single-stranded DNA-binding
gene792	FE46_RS03920	NZ_CP007627.1	complement(914191..914613)	423	6.19252	7.44044	2.6982	Gliding motility precursor
gene1866	FE46_RS09230	NZ_CP007627.1	complement(2101541..2102611)	1071	29.0437	34.8966	2.69331	exopolyphosphatase
gene955	FE46_RS04725	NZ_CP007627.1	1097110..1097682	573	11.1429	13.3884	2.68632	non-canonical purine NTP diphosphatase
gene1462	FE46_RS07220	NZ_CP007627.1	complement(1659485..1660615)	1131	2.46079	2.95669	2.68188	efflux RND transporter periplasmic adaptor subunit
gene923	FE46_RS04570	NZ_CP007627.1	1067735..1068208	474	6.21701	7.46987	2.66754	histidyl-tRNA synthetase
gene834	FE46_RS04135	NZ_CP007627.1	968722..969444	723	64.9877	78.0841	2.65325	DUF4197 domain-containing
gene1063	FE46_RS05265	NZ_CP007627.1	1222274..1223527	1254	4.96105	5.96081	2.61744	nucleoside permease
gene821	FE46_RS04065	NZ_CP007627.1	complement(950112..953201)	3090	1.27157	1.52782	2.60826	N/A
gene2238	FE46_RS11085	NZ_CP007627.1	complement(2498629..2499201)	573	5.14287	6.17926	2.58908	adenylate kinase
gene220	FE46_RS01090	NZ_CP007627.1	259427..260167	741	1.98844	2.38915	2.58908	N/A
gene2391	FE46_RS11845	NZ_CP007627.1	2679341..2680342	1002	4.90164	5.88942	2.57394	hypothetical protein
gene1260	N/A	NZ_CP007627.1	1437593..1440484	2892	32820.4	39434.4	2.56275	N/A
gene415	FE46_RS02050	NZ_CP007627.1	488587..489840	1254	1.43609	1.7255	2.56168	N/A
gene2532	FE46_RS12540	NZ_CP007627.1	complement(2835590..2836804)	1215	7.14146	8.58062	2.54113	peptidase M23
gene1155	FE46_RS05725	NZ_CP007627.1	complement(1315594..1316772)	1179	1.24973	1.50158	2.44524	N/A
gene967	FE46_RS04785	NZ_CP007627.1	1110505..1110690	186	1.76037	2.11512	2.44524	N/A
gene70	FE46_RS00355	NZ_CP007627.1	complement(90729..91625)	897	2.37268	2.85082	2.44524	Abi family protein
gene2340	FE46_RS11590	NZ_CP007627.1	complement(2629837..2631018)	1182	2.0776	2.49628	2.44524	Glycosyl group 2 family
gene885	FE46_RS04390	NZ_CP007627.1	complement(1029379..1029603)	225	2.18286	2.62275	2.44524	DUF2132 domain-containing
gene886	FE46_RS04395	NZ_CP007627.1	1029668..1030120	453	8.67362	10.4215	2.44524	N/A
gene466	FE46_RS02300	NZ_CP007627.1	547984..548691	708	9.01818	10.8355	2.44524	UMP kinase
gene1152	FE46_RS05710	NZ_CP007627.1	1313406..1314311	906	43.0067	51.6735	2.41982	DUF4349 domain-containing
gene2398	FE46_RS11880	NZ_CP007627.1	2692674..2693162	489	2.00877	2.41358	2.41358	N/A
gene1362	FE46_RS06735	NZ_CP007627.1	complement(1551350..1552003)	654	2.00263	2.4062	2.4062	N/A
gene1757	FE46_RS08690	NZ_CP007627.1	complement(1984729..1985244)	516	26.9685	32.4032	2.40284	N/A
gene2547	FE46_RS12610	NZ_CP007627.1	complement(2851069..2852799)	1731	2.08072	2.50003	2.3909	family siderophore biosynthesis
gene869	FE46_RS04310	NZ_CP007627.1	complement(1009928..1010695)	768	7.88729	9.47675	2.38089	Antitoxin component of the toxin-antitoxin module [Flavobacterium psychrophilum DSM 3660]
gene1678	FE46_RS08300	NZ_CP007627.1	complement(1906459..1907589)	1131	5.06632	6.08729	2.37732	tRNA guanosine(34) transglycosylase Tgt
gene1567	FE46_RS07745	NZ_CP007627.1	1784753..1785421	669	1.95772	2.35225	2.35225	N/A
gene1965	FE46_RS09725	NZ_CP007627.1	2205019..2206026	1008	1.94898	2.34175	2.34175	N/A
gene1985	FE46_RS09825	NZ_CP007627.1	complement(2224637..2225281)	645	5.33024	6.4044	2.33409	PAS domain-containing
gene484	FE46_RS02390	NZ_CP007627.1	complement(571019..571642)	624	2.09891	2.52188	2.3014	histidine kinase
gene1939	FE46_RS09595	NZ_CP007627.1	complement(2174048..2174992)	945	5.19729	6.24465	2.29241	ABC transporter ATP-binding
gene1711	FE46_RS08465	NZ_CP007627.1	complement(1942706..1943044)	339	6.76108	8.12358	2.28222	hypothetical protein FPSM_01757
gene1080	FE46_RS05350	NZ_CP007627.1	1242652..1242939	288	15.3482	18.4412	2.2766	cytochrome c
gene1172	FE46_RS05810	NZ_CP007627.1	complement(1339425..1341897)	2473	2.44943	2.94304	2.23392	N/A
gene2046	FE46_RS10125	NZ_CP007627.1	complement(2298093..2299472)	1380	5.69442	6.84197	2.19386	peptidylprolyl isomerase
gene2426	FE46_RS12020	NZ_CP007627.1	complement(2720189..2722354)	2166	2.26752	2.72447	2.18977	S9 family peptidase
gene716	FE46_RS03550	NZ_CP007627.1	842220..842669	450	6.18478	7.43114	2.18785	glutamyl-tRNA amidotransferase
gene245	FE46_RS01215	NZ_CP007627.1	286720..287490	771	20.3847	24.4926	2.18366	DUF3108 domain-containing protein
gene1270	FE46_RS06280	NZ_CP007627.1	1448795..1449208	414	13.0497	15.6795	2.18089	DUF1456 family
gene1114	FE46_RS05520	NZ_CP007627.1	complement(1271472..1273868)	2397	3.34669	4.02112	2.17849	T9SS type B sorting domain-containing
gene1544	FE46_RS07630	NZ_CP007627.1	complement(1759719..1760267)	549	7.15692	8.59919	2.17355	DUF1697 domain-containing
gene1682	FE46_RS08320	NZ_CP007627.1	complement(1911333..1911983)	651	2.01185	2.41729	2.17355	phosphatidylserine decarboxylase family
gene1570	FE46_RS07760	NZ_CP007627.1	1787532..1787966	435	1.50542	1.8088	2.17355	N/A
gene2003	FE46_RS09915	NZ_CP007627.1	complement(2250460..2251077)	618	2.11928	2.54636	2.17355	family
gene1951	FE46_RS09655	NZ_CP007627.1	complement(2188195..2191149)	2955	2.82553	3.39494	2.16882	histidine kinase
gene1687	FE46_RS08345	NZ_CP007627.1	1915904..1916632	729	1.79659	2.15865	2.15865	N/A
gene1361	FE46_RS06730	NZ_CP007627.1	complement(1549883..1551325)	1443	6.35344	7.6338	2.15643	inorganic phosphate transporter
gene718	FE46_RS03560	NZ_CP007627.1	842840..843658	819	2.19885	2.64197	2.15181	zinc-dependent peptidase
gene1347	FE46_RS06660	NZ_CP007627.1	1534170..1534994	825	1.78598	2.14589	2.14589	N/A
gene2325	FE46_RS11515	NZ_CP007627.1	complement(2605739..2606221)	483	2.37268	2.85082	2.13959	family transcriptional regulator
gene796	FE46_RS03940	NZ_CP007627.1	919119..920264	1146	1.42857	1.71646	2.1263	N/A
gene2570	FE46_RS12725	NZ_CP007627.1	complement(2875853..2877211)	1359	1.56607	1.88167	2.11921	N/A
gene801	FE46_RS03965	NZ_CP007627.1	925201..926247	1047	5.94189	7.1393	2.1118	Glycine D-amino acid oxidases (Deaminating) family Fjo30
gene1935	FE46_RS09575	NZ_CP007627.1	complement(2170170..2171372)	1203	3.40222	4.08783	2.10797	IS256 family transposase
gene787	FE46_RS03900	NZ_CP007627.1	complement(909147..909989)	843	1.74784	2.10007	2.10007	N/A
gene2386	FE46_RS11820	NZ_CP007627.1	complement(2671341..2671751)	411	1.195	1.43581	2.09592	N/A
gene203	FE46_RS01005	NZ_CP007627.1	complement(242338..242961)	624	4.72254	5.67423	2.09592	nicotinamide mononucleotide transporter
gene331	FE46_RS01635	NZ_CP007627.1	389091..389951	861	1.7113	2.05617	2.09592	N/A
gene1905	FE46_RS09425	NZ_CP007627.1	complement(2134873..2135367)	495	0.99221	1.19216	2.09592	N/A
gene1479	FE46_RS07305	NZ_CP007627.1	complement(1685936..1686631)	696	32.2254	38.7195	2.09374	DUF541 domain-containing
gene883	FE46_RS04380	NZ_CP007627.1	complement(1028276..1028557)	282	1.74165	2.09262	2.09262	N/A
gene788	FE46_RS03905	NZ_CP007627.1	complement(910089..910592)	504	4.54763	5.46407	2.07475	lipo
gene1137	FE46_RS05635	NZ_CP007627.1	1295513..1296793	1281	1.40582	1.68913	2.06905	N/A
gene328	FE46_RS01615	NZ_CP007627.1	383223..386630	3408	1.92153	2.30876	2.05915	hypothetical protein
gene4	FE46_RS00025	NZ_CP007627.1	7106..7669	564	2.32219	2.79016	2.05915	OmpH family outer membrane protein
gene990	FE46_RS04900	NZ_CP007627.1	1132494..1134026	1533	1.7087	2.05304	2.05304	N/A
gene1139	FE46_RS05645	NZ_CP007627.1	complement(1297757..1298734)	978	2.17617	2.61471	2.05085	glycosyltransferase
gene1578	FE46_RS07800	NZ_CP007627.1	1796675..1797601	927	0.883035	1.06098	2.0377	N/A
gene2569	FE46_RS12720	NZ_CP007627.1	complement(2875078..2875851)	774	1.69214	2.03314	2.03314	N/A
gene1003	FE46_RS04965	NZ_CP007627.1	1149562..1151218	1657	2.17364	2.61167	2.03001	[Flavobacterium psychrophilum]
gene356	FE46_RS01760	NZ_CP007627.1	complement(422847..423101)	255	44.9413	53.9979	2.02564	hypothetical protein
gene410	FE46_RS02030	NZ_CP007627.1	484505..485761	1257	2.08388	2.50382	2.00635	tyrosine-type recombinase integrase
gene2119	FE46_RS10490	NZ_CP007627.1	2382364..2383464	1101	1.63566	1.96528	1.96528	N/A
gene999	FE46_RS04945	NZ_CP007627.1	1142578..1144380	1803	4.26766	5.12768	1.96455	T9SS type A sorting domain-containing
gene276	FE46_RS01355	NZ_CP007627.1	complement(320571..321572)	1002	1.63388	1.96314	1.96314	N/A
gene814	FE46_RS04030	NZ_CP007627.1	942016..943119	1104	1.63121	1.95994	1.95994	N/A
gene1915	FE46_RS09475	NZ_CP007627.1	complement(2145903..2146124)	222	1.47491	1.77213	1.95619	N/A
gene1540	FE46_RS07610	NZ_CP007627.1	1756942..1757523	582	1.68778	2.0279	1.95619	tRNA-(ms[2]io[6]A)-hydroxylase
gene694	FE46_RS03440	NZ_CP007627.1	816376..817617	1242	4.48172	5.38488	1.95619	hypothetical protein
gene1618	FE46_RS08000	NZ_CP007627.1	1844647..1844865	219	2.99022	3.59281	1.95619	DUF2007 domain-containing
gene515	FE46_RS02545	NZ_CP007627.1	603777..604472	696	2.35222	2.82624	1.95619	alpha beta hydrolase
gene1778	FE46_RS08795	NZ_CP007627.1	2012916..2013482	567	342.732	411.8	1.94212	family
gene851	FE46_RS04220	NZ_CP007627.1	988144..990276	2133	23.4865	28.2195	1.94097	family
gene1604	FE46_RS07930	NZ_CP007627.1	1831432..1831911	480	3.75179	4.50786	1.92126	transcriptional regulator
gene1586	FE46_RS07840	NZ_CP007627.1	1803395..1804492	1098	52.9314	63.5982	1.90992	T9SS type A sorting domain-containing
gene371	FE46_RS01835	NZ_CP007627.1	441479..442183	705	3.71551	4.46426	1.90848	methyltransferase
gene1308	FE46_RS06465	NZ_CP007627.1	complement(1491816..1493150)	1335	1.96212	2.35753	1.90848	DEAD DEAH box helicase
gene1024	FE46_RS12975	NZ_CP007627.1	complement(1177750..1179411)	1662	3.44766	4.14244	1.90185	antirepressor
gene1008	FE46_RS04990	NZ_CP007627.1	complement(1156059..1156721)	663	2.96316	3.5603	1.89309	thiamine diphosphokinase
gene837	FE46_RS04150	NZ_CP007627.1	970926..971741	816	3.41072	4.09805	1.8895	1-acyl-sn-glycerol-3-phosphate acyltransferase
gene176	FE46_RS00870	NZ_CP007627.1	complement(212637..213059)	423	1.93516	2.32514	1.88095	DUF4296 domain-containing protein
gene2377	FE46_RS11775	NZ_CP007627.1	2662511..2663347	837	1.56478	1.88011	1.88011	N/A
gene1228	FE46_RS06090	NZ_CP007627.1	1396070..1396273	204	6.42018	7.71398	1.86304	conserved hypothetical protein
gene2099	FE46_RS10390	NZ_CP007627.1	2363878..2364723	846	1.54813	1.86011	1.86011	N/A
gene2097	FE46_RS10380	NZ_CP007627.1	2361948..2363063	1116	1.61367	1.93886	1.85501	Nif3-like dinuclear metal center hexameric
gene1020	FE46_RS05050	NZ_CP007627.1	complement(1174221..1174760)	540	28.1953	33.8772	1.84884	hypothetical protein
gene393	FE46_RS01945	NZ_CP007627.1	464696..465370	675	4.12318	4.95409	1.84752	tRNA (guanosine(46)-N7)-methyltransferase
gene1783	FE46_RS08820	NZ_CP007627.1	2017821..2018435	615	10.6481	12.7939	1.84546	N-(5 -phosphoribosyl)anthranilate isomerase
gene1138	FE46_RS05640	NZ_CP007627.1	complement(1296790..1297752)	963	1.53004	1.83838	1.83838	N/A
gene867	FE46_RS04300	NZ_CP007627.1	1008058..1008510	453	19.1543	23.0142	1.83827	transcriptional repressor
gene2510	FE46_RS12430	NZ_CP007627.1	2812528..2813034	507	0.968726	1.16394	1.83393	N/A
gene1116	FE46_RS05530	NZ_CP007627.1	complement(1276196..1277032)	837	9.38865	11.2807	1.83393	ABC transporter permease
gene1896	FE46_RS09380	NZ_CP007627.1	2125801..2126913	1113	2.64768	3.18124	1.83393	glycosyl transferase family 2
gene2483	FE46_RS12295	NZ_CP007627.1	complement(2773669..2774418)	750	47.5864	57.176	1.83183	Fe-S cluster assembly ATPase
gene1575	FE46_RS07785	NZ_CP007627.1	complement(1792416..1794326)	1911	4.45482	5.35256	1.82953	band 7
gene912	FE46_RS04515	NZ_CP007627.1	complement(1058289..1058504)	216	1.51588	1.82136	1.82136	N/A
gene2096	FE46_RS10375	NZ_CP007627.1	complement(2360392..2361618)	1227	4.66994	5.61103	1.82092	peptidoglycan endopeptidase
gene1104	FE46_RS05470	NZ_CP007627.1	1262798..1263664	867	2.45478	2.94946	1.81646	DMT family transporter
gene1943	FE46_RS09615	NZ_CP007627.1	complement(2177924..2178400)	477	11.6694	14.021	1.80735	Lipocalin-like domain-containing
gene2297	FE46_RS11380	NZ_CP007627.1	complement(2567540..2568817)	1278	4.48358	5.38711	1.78299	kynureninase
gene1758	FE46_RS08695	NZ_CP007627.1	complement(1985255..1986166)	912	9.87314	11.8628	1.7813	N/A
gene2004	FE46_RS09920	NZ_CP007627.1	complement(2251098..2251478)	381	1.71879	2.06516	1.77836	four helix bundle
gene2528	FE46_RS12520	NZ_CP007627.1	complement(2831943..2832257)	315	4.15783	4.99572	1.77836	hypothetical protein
gene1434	FE46_RS07090	NZ_CP007627.1	1628341..1629321	981	0.667542	0.802066	1.77836	N/A
gene205	FE46_RS01015	NZ_CP007627.1	complement(243704..244345)	642	1.02003	1.22559	1.77836	N/A
gene2195	FE46_RS10870	NZ_CP007627.1	complement(2463994..2464110)	117	5.59708	6.72501	1.77836	50S ribosomal L36
gene2138	FE46_RS10585	NZ_CP007627.1	complement(2402597..2403511)	915	0.715692	0.859919	1.77836	N/A
gene1786	FE46_RS08835	NZ_CP007627.1	2020849..2021739	891	22.2329	26.7132	1.76641	metalloprotease
gene682	FE46_RS03380	NZ_CP007627.1	805188..806513	1326	25.5573	30.7076	1.76057	trigger factor
gene647	FE46_RS03205	NZ_CP007627.1	771262..772155	894	1.46501	1.76024	1.76024	N/A
gene1125	FE46_RS05575	NZ_CP007627.1	1284961..1286328	1368	25.1316	30.1962	1.74068	histidine kinase
gene1641	FE46_RS08115	NZ_CP007627.1	complement(1868094..1869254)	1161	2.3972	2.88029	1.73205	hypothetical protein
gene474	FE46_RS02340	NZ_CP007627.1	complement(558710..559198)	489	2.00877	2.41358	1.72605	GNAT family N-acetyltransferase
gene1696	FE46_RS08390	NZ_CP007627.1	1926295..1927170	876	1.12133	1.34731	1.72605	N/A
gene944	FE46_RS04670	NZ_CP007627.1	1087234..1088817	1584	32.1435	38.6211	1.72247	HAMP domain-containing histidine kinase
gene1036	FE46_RS05130	NZ_CP007627.1	complement(1187695..1188636)	942	3.99436	4.80054	1.71438	family transcriptional regulator
gene1763	FE46_RS08720	NZ_CP007627.1	complement(1990562..1993546)	2985	11.6273	13.9705	1.71369	translocase subunit
gene1870	FE46_RS09250	NZ_CP007627.1	complement(2104590..2105585)	996	37.1481	44.6342	1.70563	FKBP-type peptidylprolyl isomerase
gene2160	FE46_RS10695	NZ_CP007627.1	complement(2427033..2427263)	231	1.41744	1.70309	1.70309	N/A
gene1158	FE46_RS05740	NZ_CP007627.1	complement(1319241..1319879)	639	2.04964	2.46268	1.70104	DUF4159 domain-containing
gene2527	FE46_RS12515	NZ_CP007627.1	complement(2830808..2831737)	930	1.4083	1.6921	1.6921	N/A
gene41	FE46_RS00210	NZ_CP007627.1	complement(61735..62397)	663	2.4693	2.96692	1.68637	uroporphyrinogen-III synthase
gene2392	FE46_RS11850	NZ_CP007627.1	2680352..2685610	5259	3.42434	4.11442	1.6811	RHS repeat-associated core domain-containing
gene1784	FE46_RS08825	NZ_CP007627.1	2018448..2019629	1182	4.57071	5.49181	1.6811	tryptophan synthase subunit beta
gene1042	FE46_RS05160	NZ_CP007627.1	complement(1194264..1196213)	1950	7.05232	8.47351	1.67674	amino acid permease
gene1840	FE46_RS09105	NZ_CP007627.1	complement(2076872..2077933)	1062	1.38741	1.667	1.667	N/A
gene1728	FE46_RS08550	NZ_CP007627.1	1959508..1960107	600	1.36429	1.63922	1.63922	N/A
gene551	FE46_RS02725	NZ_CP007627.1	645958..646410	453	0.722802	0.868462	1.63016	N/A
gene2424	FE46_RS12010	NZ_CP007627.1	complement(2716925..2718409)	1485	0.99221	1.19216	1.63016	N/A
gene263	FE46_RS13125	NZ_CP007627.1	complement(306147..306458)	312	2.09891	2.52188	1.63016	hypothetical protein FPSM_00270
gene316	FE46_RS01555	NZ_CP007627.1	369560..370798	1239	5.28538	6.35049	1.63016	metallophosphoesterase
gene122	FE46_RS13100	NZ_CP007627.1	154096..154284	189	8.66215	10.4078	1.63016	hypothetical protein
gene207	FE46_RS01025	NZ_CP007627.1	complement(246022..246630)	609	7.25829	8.72098	1.63016	hypothetical protein FPN184_contig00088-0002
gene1416	FE46_RS07000	NZ_CP007627.1	1613470..1613916	447	0.732504	0.880119	1.63016	N/A
gene679	FE46_RS03365	NZ_CP007627.1	complement(802872..803765)	894	0.732504	0.880119	1.63016	N/A
gene1734	FE46_RS08580	NZ_CP007627.1	1963995..1964840	846	2.12868	2.55765	1.63016	IS3 family transposase
gene570	FE46_RS02820	NZ_CP007627.1	complement(671710..672723)	1014	0.645817	0.775963	1.63016	N/A
gene620	FE46_RS03070	NZ_CP007627.1	731730..731984	255	1.28404	1.5428	1.63016	N/A
gene1167	FE46_RS05785	NZ_CP007627.1	complement(1332496..1333383)	888	0.737453	0.886066	1.63016	N/A
gene910	FE46_RS04505	NZ_CP007627.1	complement(1056819..1057706)	888	0.737453	0.886066	1.63016	N/A
gene508	FE46_RS02510	NZ_CP007627.1	complement(597705..598550)	846	1.35461	1.6276	1.6276	N/A
gene132	FE46_RS00660	NZ_CP007627.1	complement(162532..164337)	1806	5.07642	6.09943	1.62051	BatD protein
gene2341	FE46_RS11595	NZ_CP007627.1	complement(2631034..2631519)	486	1.34745	1.61898	1.61898	N/A
gene136	FE46_RS00680	NZ_CP007627.1	complement(167595..168596)	1002	3.43115	4.12259	1.60469	VWA domain-containing protein
gene1996	FE46_RS09880	NZ_CP007627.1	2240342..2242945	2604	2.64056	3.17269	1.59225	DUF2339 domain-containing
gene1452	FE46_RS07170	NZ_CP007627.1	complement(1647192..1649063)	1872	1.22436	1.4711	1.59225	N/A
gene1922	FE46_RS09510	NZ_CP007627.1	2151086..2152453	1368	1.31642	1.5817	1.5817	N/A
gene2274	N/A	NZ_CP007627.1	complement(2539932..2541447)	1516	11222.6	13484.2	1.57327	N/A
gene1325	FE46_RS06550	NZ_CP007627.1	1506529..1508622	2094	0.625462	0.751506	1.56495	N/A
gene1296	FE46_RS06405	NZ_CP007627.1	1470579..1473746	3168	2.79059	3.35295	1.56264	efflux RND transporter permease subunit
gene1460	FE46_RS07210	NZ_CP007627.1	1656390..1658318	1929	1.95202	2.34539	1.56224	alkaline phosphatase family
gene2280	FE46_RS11295	NZ_CP007627.1	complement(2547622..2548254)	633	3.87949	4.66129	1.56079	7-carboxy-7-deazaguanine synthase
gene1028	FE46_RS05090	NZ_CP007627.1	1181759..1182415	657	1.7443	2.09581	1.55606	family deoxyribonuclease
gene1117	FE46_RS05535	NZ_CP007627.1	complement(1277068..1277991)	924	12.4026	14.902	1.55606	ABC transporter ATP-binding
gene1005	FE46_RS04975	NZ_CP007627.1	1152735..1154129	1395	15.6086	18.7541	1.55235	tetratricopeptide repeat
gene246	FE46_RS01220	NZ_CP007627.1	287492..288418	927	6.35785	7.63909	1.54436	tryptophan 2,3-dioxygenase
gene2350	FE46_RS11640	NZ_CP007627.1	complement(2637242..2637499)	258	1.26911	1.52486	1.52486	N/A
gene470	FE46_RS12945	NZ_CP007627.1	552031..552939	909	1.26073	1.51479	1.51479	N/A
gene1150	FE46_RS05700	NZ_CP007627.1	complement(1310497..1311801)	1305	1.25452	1.50733	1.50733	N/A
gene38	FE46_RS00195	NZ_CP007627.1	complement(59256..59777)	522	1.25452	1.50733	1.50733	N/A
gene268	FE46_RS01315	NZ_CP007627.1	complement(311350..312330)	981	2.67017	3.20826	1.50476	ribosome small subunit-dependent GTPase A
gene702	FE46_RS03480	NZ_CP007627.1	complement(825053..825817)	765	4.70813	5.65692	1.49431	alpha beta hydrolase
gene1886	FE46_RS09330	NZ_CP007627.1	complement(2115286..2115795)	510	93.0926	111.853	1.48975	sigma-70 family RNA polymerase sigma factor
gene863	FE46_RS04280	NZ_CP007627.1	1002879..1004282	1404	1.86569	2.24167	1.47637	lysophospholipase L1-like esterase
gene1070	FE46_RS05300	NZ_CP007627.1	1230148..1230792	645	4.06114	4.87954	1.47637	pyridoxamine 5 -phosphate oxidase
gene1499	FE46_RS07405	NZ_CP007627.1	1711570..1712049	480	1.02322	1.22942	1.46714	N/A
gene1547	FE46_RS07645	NZ_CP007627.1	complement(1762260..1762568)	309	6.35785	7.63909	1.46714	XRE family transcriptional regulator
gene1983	FE46_RS09815	NZ_CP007627.1	2222835..2223227	393	1.24973	1.50158	1.46714	hypothetical protein
gene828	FE46_RS04105	NZ_CP007627.1	complement(959364..959696)	333	1.47491	1.77213	1.46714	family transcriptional regulator
gene2530	FE46_RS12530	NZ_CP007627.1	2833706..2834659	954	33.2921	40.0011	1.46187	SPOR domain-containing
gene2268	FE46_RS11235	NZ_CP007627.1	complement(2533825..2535108)	1284	3.31509	3.98316	1.46152	UDP-N-acetylmuramoyl-tripeptide--D-alanyl-D-alanine ligase
gene1993	FE46_RS09865	NZ_CP007627.1	2236474..2238606	2133	1.76532	2.12107	1.46079	S9 family peptidase
gene1309	FE46_RS06470	NZ_CP007627.1	complement(1493240..1494784)	1545	2.6491	3.18295	1.4555	DEAD DEAH box helicase
gene362	FE46_RS01790	NZ_CP007627.1	428184..430676	2493	1.77308	2.1304	1.45102	carboxypeptidase-like regulatory domain-containing
gene2523	FE46_RS12495	NZ_CP007627.1	complement(2827835..2828392)	558	2.34716	2.82017	1.44903	LPS export ABC transporter periplasmic
gene1904	FE46_RS09420	NZ_CP007627.1	complement(2133725..2134756)	1032	1.26911	1.52486	1.44903	tetraacyldisaccharide 4 -kinase
gene934	FE46_RS04620	NZ_CP007627.1	complement(1077490..1078284)	795	12.9736	15.5881	1.44648	outer membrane assembly factor
gene424	FE46_RS02095	NZ_CP007627.1	complement(500032..501174)	1143	2.57818	3.09774	1.44309	2-amino-4-hydroxy-6-hydroxymethyldihydropteridine diphosphokinase
gene1030	FE46_RS05100	NZ_CP007627.1	complement(1183227..1184255)	1029	2.86381	3.44093	1.44309	family transcriptional regulator
gene1388	FE46_RS06865	NZ_CP007627.1	1583459..1584367	909	0.900521	1.08199	1.43838	N/A
gene116	FE46_RS00585	NZ_CP007627.1	144806..146653	1848	36.2334	43.5352	1.43487	glutamine--fructose-6-phosphate transaminase (isomerizing)
gene54	FE46_RS00275	NZ_CP007627.1	complement(73421..74101)	681	2.88484	3.4662	1.43136	RloB domain-containing protein
gene1855	FE46_RS09175	NZ_CP007627.1	2092187..2093944	1758	0.83813	1.00703	1.41982	N/A
gene1673	FE46_RS08275	NZ_CP007627.1	complement(1900536..1901552)	1017	2.8976	3.48153	1.41982	Replicative DNA helicase
gene2047	FE46_RS10130	NZ_CP007627.1	complement(2299476..2301452)	1977	4.80296	5.77086	1.41824	peptidyl-prolyl cis-trans isomerase
gene1537	FE46_RS07595	NZ_CP007627.1	1753897..1754400	504	3.57314	4.2932	1.41567	DUF421 domain-containing
gene2330	FE46_RS13295	NZ_CP007627.1	complement(2612814..2613371)	558	7.04149	8.4605	1.41412	IS5 family transposase
gene267	FE46_RS01310	NZ_CP007627.1	complement(310787..311239)	453	0.722802	0.868462	1.39728	N/A
gene2360	FE46_RS11690	NZ_CP007627.1	complement(2645519..2645980)	462	1.41744	1.70309	1.39728	ABC transporter permease
gene1732	FE46_RS08570	NZ_CP007627.1	1963175..1963588	414	0.790892	0.950273	1.39728	N/A
gene2519	FE46_RS12475	NZ_CP007627.1	2822523..2823377	855	0.765916	0.920265	1.39728	N/A
gene563	FE46_RS02785	NZ_CP007627.1	complement(662983..663264)	282	1.1611	1.39508	1.39508	N/A
gene581	FE46_RS02875	NZ_CP007627.1	682658..683404	747	2.84912	3.42327	1.38209	hypothetical protein
gene1833	FE46_RS09070	NZ_CP007627.1	2068341..2069642	1302	6.41279	7.7051	1.37798	30S ribosomal S12 methylthiotransferase
gene1437	FE46_RS07105	NZ_CP007627.1	complement(1630574..1631776)	1203	1.2248	1.47162	1.37545	IS256 family transposase
gene1203	FE46_RS05965	NZ_CP007627.1	1367444..1367731	288	1.13691	1.36602	1.36602	N/A
gene252	FE46_RS01250	NZ_CP007627.1	298090..299178	1089	7.06574	8.48963	1.36007	biotin synthase BioB
gene1919	FE46_RS09495	NZ_CP007627.1	complement(2148287..2148520)	234	3.49818	4.20313	1.35847	thioredoxin family
gene1958	FE46_RS09690	NZ_CP007627.1	complement(2198439..2199116)	678	14.0051	16.8274	1.3507	DUF4294 domain-containing
gene680	FE46_RS03370	NZ_CP007627.1	803863..804639	777	9.90295	11.8986	1.33635	alpha beta fold hydrolase
gene1297	FE46_RS06410	NZ_CP007627.1	1473739..1475175	1437	2.73427	3.28529	1.33377	family
gene1948	FE46_RS09640	NZ_CP007627.1	2185934..2186830	897	3.83278	4.60517	1.33377	family transporter
gene1675	FE46_RS08285	NZ_CP007627.1	complement(1903286..1904239)	954	10.983	13.1962	1.33188	acetyl- carboxylase carboxyltransferase subunit alpha
gene1968	FE46_RS09740	NZ_CP007627.1	2207421..2207717	297	1.10246	1.32462	1.32462	N/A
gene537	FE46_RS02655	NZ_CP007627.1	625863..627599	1737	1.22527	1.47219	1.32451	tellurite resistance
gene1337	FE46_RS06610	NZ_CP007627.1	complement(1521514..1522077)	564	2.90274	3.48771	1.32175	elongation factor P
gene1201	FE46_RS05955	NZ_CP007627.1	1365372..1366871	1500	0.764002	0.917964	1.31667	N/A
gene1169	FE46_RS05795	NZ_CP007627.1	1335581..1336510	930	13.0268	15.6519	1.31598	lipo
gene2083	FE46_RS10310	NZ_CP007627.1	complement(2347407..2348270)	864	6.63196	7.96844	1.30662	peptidoglycan-binding domain-containing
gene696	FE46_RS03450	NZ_CP007627.1	819206..821191	1986	1.31895	1.58475	1.30413	DNA primase
gene1794	FE46_RS08875	NZ_CP007627.1	2030294..2031490	1197	1.09417	1.31466	1.30413	tetratricopeptide repeat
gene1231	FE46_RS06105	NZ_CP007627.1	complement(1398902..1399867)	966	0.677907	0.81452	1.30413	N/A
gene2092	FE46_RS10355	NZ_CP007627.1	complement(2355597..2356130)	534	1.22633	1.47346	1.30413	GNAT family N-acetyltransferase
gene2044	FE46_RS10115	NZ_CP007627.1	complement(2295794..2296537)	744	1.76037	2.11512	1.30413	SDR family NAD(P)-dependent oxidoreductase
gene418	FE46_RS02065	NZ_CP007627.1	491462..495718	4257	1.07682	1.29382	1.29382	N/A
gene237	FE46_RS01175	NZ_CP007627.1	275679..276272	594	5.23666	6.29196	1.29054	lipoprotein signal peptidase
gene2066	FE46_RS10225	NZ_CP007627.1	complement(2326118..2326420)	303	26.4753	31.8106	1.28835	ribosome-associated translation inhibitor
gene1211	FE46_RS06005	NZ_CP007627.1	1375479..1376915	1437	0.56964	0.684435	1.28697	N/A
gene105	FE46_RS00530	NZ_CP007627.1	complement(134318..136273)	1956	1.75767	2.11188	1.28375	glycosyl transferase
gene1272	FE46_RS06290	NZ_CP007627.1	complement(1449961..1451157)	1197	62.0939	74.6072	1.28192	ADP-forming succinate-- ligase subunit beta
gene2339	FE46_RS11585	NZ_CP007627.1	complement(2626150..2629833)	3684	1.06654	1.28148	1.28148	N/A
gene1760	FE46_RS08705	NZ_CP007627.1	1987642..1989402	1761	1.02264	1.22872	1.28084	N/A
gene573	FE46_RS02835	NZ_CP007627.1	675437..676639	1203	2.99395	3.59729	1.28084	IS256 family transposase
gene1436	FE46_RS07100	NZ_CP007627.1	1629802..1630551	750	1.30972	1.57365	1.27578	DDE transposase
gene2383	FE46_RS11805	NZ_CP007627.1	complement(2667251..2669413)	2163	1.05964	1.27318	1.27318	N/A
gene2239	FE46_RS11090	NZ_CP007627.1	complement(2499306..2499839)	534	3.98556	4.78874	1.27153	hypoxanthine phosphoribosyltransferase
gene438	FE46_RS02165	NZ_CP007627.1	complement(517584..518681)	1098	8.94616	10.749	1.27025	acyl- desaturase
gene634	FE46_RS03140	NZ_CP007627.1	complement(749666..751366)	1701	5.38978	6.47594	1.2679	L,D-transpeptidase family
gene1595	FE46_RS07885	NZ_CP007627.1	complement(1821722..1822345)	624	1.04945	1.26094	1.26094	N/A
gene1411	FE46_RS06980	NZ_CP007627.1	complement(1609284..1610087)	804	2.03625	2.4466	1.25397	SDR family oxidoreductase
gene283	FE46_RS01390	NZ_CP007627.1	complement(327541..328332)	792	0.826842	0.993468	1.22262	N/A
gene1926	FE46_RS09530	NZ_CP007627.1	complement(2156078..2156296)	219	0.747555	0.898204	1.22262	N/A
gene561	FE46_RS02775	NZ_CP007627.1	complement(659316..660329)	1014	3.39054	4.0738	1.22262	DUF1016 domain-containing
gene80	FE46_RS00405	NZ_CP007627.1	102809..103402	594	2.20491	2.64925	1.22262	proline hydroxylase
gene1021	FE46_RS05055	NZ_CP007627.1	complement(1174827..1175411)	585	3.91796	4.70751	1.22262	peptide deformylase
gene2146	FE46_RS10625	NZ_CP007627.1	complement(2410607..2411293)	687	0.476607	0.572654	1.22262	N/A
gene2177	FE46_RS10780	NZ_CP007627.1	complement(2444456..2446903)	2448	0.535015	0.642832	1.22262	N/A
gene1836	FE46_RS09085	NZ_CP007627.1	2071689..2072372	684	0.478698	0.575165	1.22262	N/A
gene1288	FE46_RS06365	NZ_CP007627.1	complement(1465104..1465682)	579	0.565508	0.67947	1.22262	N/A
gene2399	FE46_RS11885	NZ_CP007627.1	2693159..2694448	1290	1.01528	1.21989	1.21989	N/A
gene2495	FE46_RS12355	NZ_CP007627.1	complement(2788392..2788985)	594	20.1198	24.1744	1.21019	family transcriptional regulator
gene580	FE46_RS12950	NZ_CP007627.1	681062..681829	768	4.47657	5.3787	1.20824	carboxypeptidase regulatory-like domain-containing
gene2566	FE46_RS12705	NZ_CP007627.1	2871914..2872144	231	30.475	36.6164	1.20166	uracil phosphoribosyltransferase
gene1531	FE46_RS07565	NZ_CP007627.1	1742361..1745054	2694	5.04392	6.06037	1.20092	organic solvent tolerance
gene877	FE46_RS04350	NZ_CP007627.1	1021469..1022479	1011	3.4006	4.08589	1.19419	bifunctional oligoribonuclease PAP phosphatase
gene2275	FE46_RS11270	NZ_CP007627.1	complement(2542450..2543703)	1254	1.17499	1.41177	1.18958	ABC transporter permease
gene1666	FE46_RS08240	NZ_CP007627.1	1889451..1891415	1965	6.08202	7.30767	1.18606	potassium transporter Kup
gene803	FE46_RS03975	NZ_CP007627.1	926894..928804	1911	2.74143	3.29388	1.18557	glycosyl transferase family 2
gene900	FE46_RS04455	NZ_CP007627.1	complement(1045331..1046605)	1275	1.02723	1.23424	1.18557	O-antigen translocase
gene1749	FE46_RS08650	NZ_CP007627.1	complement(1978503..1978904)	402	6.10876	7.3398	1.18318	biopolymer transporter
gene1608	FE46_RS07950	NZ_CP007627.1	complement(1835428..1835757)	330	20.8364	25.0354	1.18046	family transcriptional regulator
gene661	FE46_RS03275	NZ_CP007627.1	complement(784657..785241)	585	6.7165	8.07001	1.17372	cytochrome oxidase subunit III
gene2301	FE46_RS11395	NZ_CP007627.1	complement(2571514..2572881)	1368	1.31642	1.5817	1.16946	NADH-quinone oxidoreductase subunit N
gene686	FE46_RS03400	NZ_CP007627.1	809381..809944	564	12.4818	14.9971	1.16828	phosphatase PAP2 family
gene687	FE46_RS03405	NZ_CP007627.1	complement(810008..810649)	642	3.82511	4.59595	1.1644	O-methyltransferase
gene480	FE46_RS02370	NZ_CP007627.1	complement(565221..566897)	1677	0.976235	1.17297	1.1644	dihydroxy-acid dehydratase
gene115	FE46_RS00580	NZ_CP007627.1	143135..144799	1665	16.8139	20.2023	1.16149	DUF4270 domain-containing protein
gene2261	FE46_RS11200	NZ_CP007627.1	complement(2522300..2522977)	678	0.965868	1.16051	1.16051	N/A
gene2005	FE46_RS09925	NZ_CP007627.1	complement(2251511..2253052)	1542	3.71596	4.46481	1.15653	signal peptidase I
gene287	FE46_RS01410	NZ_CP007627.1	330990..331841	852	0.960767	1.15438	1.15438	N/A
gene1450	FE46_RS07160	NZ_CP007627.1	1643051..1643395	345	376.781	452.71	1.15361	50S ribosomal L20
gene1633	FE46_RS08075	NZ_CP007627.1	1855491..1856534	1044	1.72496	2.07258	1.14458	family pseudouridine synthase
gene2303	FE46_RS11405	NZ_CP007627.1	complement(2574381..2576264)	1884	3.389	4.07195	1.14209	NADH-quinone oxidoreductase subunit L
gene8	FE46_RS00045	NZ_CP007627.1	complement(15057..15566)	510	0.963027	1.1571	1.12857	Crp/Fnr family transcriptional regulator
gene1007	FE46_RS04985	NZ_CP007627.1	complement(1155036..1155980)	945	2.77189	3.33048	1.11782	23S rRNA (adenine(1618)-N(6))-methyltransferase
gene1761	FE46_RS08710	NZ_CP007627.1	1989465..1989848	384	23.8751	28.6864	1.11782	N/A
gene1921	FE46_RS09505	NZ_CP007627.1	2149968..2151083	1116	14.2297	17.0973	1.11618	Iron-regulated A precursor
gene1323	FE46_RS06540	NZ_CP007627.1	complement(1504843..1505700)	858	0.954048	1.14631	1.11147	ATP phosphoribosyltransferase
gene1311	FE46_RS06480	NZ_CP007627.1	1495478..1495756	279	2.93395	3.52521	1.11147	DUF3817 domain-containing
gene2396	FE46_RS11870	NZ_CP007627.1	2690966..2691697	732	1.11827	1.34362	1.11147	Hypothetical lipo precursor
gene966	FE46_RS04780	NZ_CP007627.1	1107265..1110489	3225	0.761463	0.914914	1.11147	N/A
gene2081	FE46_RS10300	NZ_CP007627.1	2345145..2345489	345	29.4212	35.3502	1.11066	hypothetical protein
gene989	FE46_RS04895	NZ_CP007627.1	1130185..1132347	2163	2.42204	2.91013	1.1099	N/A
gene1273	FE46_RS06295	NZ_CP007627.1	complement(1451520..1452230)	711	2.76312	3.31994	1.10728	DUF4369 domain-containing
gene2088	FE46_RS10335	NZ_CP007627.1	2352180..2352896	717	7.07832	8.50475	1.10661	SAM-dependent methyltransferase
gene1614	FE46_RS07980	NZ_CP007627.1	1840200..1841120	921	3.73291	4.48517	1.1043	ABC transporter ATP-binding
gene1957	N/A	NZ_CP007627.1	complement(2195891..2197406)	1516	7801.86	9374.1	1.09765	N/A
gene1217	FE46_RS06035	NZ_CP007627.1	1384811..1385527	717	0.913331	1.09739	1.09739	N/A
gene280	FE46_RS01375	NZ_CP007627.1	complement(325152..325469)	318	107.084	128.663	1.09614	thioredoxin
gene2405	FE46_RS11915	NZ_CP007627.1	2698155..2698334	180	0.909526	1.09281	1.09281	N/A
gene723	FE46_RS03585	NZ_CP007627.1	complement(848826..849092)	267	49.0531	58.9383	1.0898	30S ribosomal S15
gene1564	FE46_RS07730	NZ_CP007627.1	1781017..1781775	759	0.862791	1.03666	1.08677	N/A
gene432	FE46_RS02135	NZ_CP007627.1	511770..512801	1032	2.85549	3.43093	1.08677	UDP-glucose 4-epimerase
gene2278	FE46_RS11285	NZ_CP007627.1	2545701..2546402	702	2.79854	3.36251	1.08677	class I SAM-dependent methyltransferase
gene1146	FE46_RS05680	NZ_CP007627.1	complement(1304637..1305605)	969	1.01371	1.218	1.08677	lipopolysaccharide biosynthesis
gene2568	FE46_RS12715	NZ_CP007627.1	2873772..2875106	1335	1.22633	1.47346	1.08677	phenylacetate-- ligase family
gene33	FE46_RS00170	NZ_CP007627.1	complement(55110..55505)	396	1.65368	1.98694	1.08677	c-type cytochrome
gene259	FE46_RS01285	NZ_CP007627.1	complement(303314..304543)	1230	0.798608	0.959544	1.08677	N/A
gene479	FE46_RS02365	NZ_CP007627.1	complement(563509..565203)	1695	0.965868	1.16051	1.08677	biosynthetic-type acetolactate synthase large subunit
gene833	FE46_RS04130	NZ_CP007627.1	967997..968314	318	1.02965	1.23715	1.08677	type II toxin-antitoxin system family toxin
gene214	FE46_RS01060	NZ_CP007627.1	complement(255354..256277)	924	47.8387	57.4792	1.07527	sugar kinase
gene1741	FE46_RS13250	NZ_CP007627.1	complement(1969276..1969458)	183	0.894616	1.0749	1.0749	N/A
gene1746	FE46_RS08635	NZ_CP007627.1	complement(1973609..1974463)	855	1.72331	2.0706	1.07352	family
gene778	FE46_RS03855	NZ_CP007627.1	899861..900229	369	0.887342	1.06616	1.06616	N/A
gene1281	FE46_RS06330	NZ_CP007627.1	complement(1457959..1458357)	399	2.05156	2.46499	1.06315	cytochrome c
gene2011	FE46_RS09955	NZ_CP007627.1	complement(2258035..2259363)	1329	11.3331	13.617	1.06114	tRNA (N(6)-L-threonylcarbamoyladenosine(37)-C(2))-methylthiotransferase
gene810	FE46_RS04010	NZ_CP007627.1	934772..935338	567	2.30991	2.7754	1.0574	DUF4494 domain-containing
gene2052	FE46_RS10155	NZ_CP007627.1	complement(2311950..2312258)	309	7.94731	9.54886	1.04796	DUF3467 domain-containing
gene972	FE46_RS04810	NZ_CP007627.1	complement(1115464..1116594)	1131	0.868513	1.04354	1.04354	N/A
gene1612	FE46_RS07970	NZ_CP007627.1	1838281..1838853	573	56.5716	67.9719	1.04344	nucleotide exchange factor
gene162	FE46_RS00800	NZ_CP007627.1	192608..192796	189	0.866215	1.04078	1.04078	N/A
gene1113	FE46_RS05515	NZ_CP007627.1	1270874..1271437	564	2.03192	2.44139	1.03737	gliding motility lipo
gene2477	FE46_RS12265	NZ_CP007627.1	complement(2767609..2767932)	324	2.02117	2.42848	1.02957	SUF system Fe-S cluster assembly
gene902	FE46_RS04465	NZ_CP007627.1	complement(1047706..1048683)	978	2.00877	2.41358	1.02957	GNAT family N-acetyltransferase
gene2188	FE46_RS10835	NZ_CP007627.1	complement(2457059..2459545)	2487	0.855766	1.02822	1.02822	N/A
gene1066	FE46_RS05280	NZ_CP007627.1	complement(1225146..1226540)	1395	1.52566	1.83311	1.02542	Arginine decarboxylase
gene1811	FE46_RS08970	NZ_CP007627.1	2045365..2045556	192	0.85268	1.02451	1.02451	N/A
gene373	FE46_RS01845	NZ_CP007627.1	complement(443684..444259)	576	0.85268	1.02451	1.02451	N/A
gene153	FE46_RS00755	NZ_CP007627.1	complement(183088..184731)	1644	1.39416	1.67512	1.02189	glucose-6-phosphate isomerase
gene425	FE46_RS02100	NZ_CP007627.1	501298..503061	1764	9.09526	10.9281	1.01972	signal peptide peptidase
gene1161	FE46_RS05755	NZ_CP007627.1	1321772..1326298	4527	0.723281	0.869037	1.01885	N/A
gene51	FE46_RS00260	NZ_CP007627.1	complement(71342..72076)	735	6.23675	7.49358	1.01432	1-acyl-sn-glycerol-3-phosphate acyltransferase
gene2522	FE46_RS12490	NZ_CP007627.1	complement(2827626..2827820)	195	0.839562	1.00875	1.00875	N/A
gene1689	FE46_RS08355	NZ_CP007627.1	complement(1917801..1918028)	228	5.02633	6.03924	1.00686	membrane insertion efficiency factor
gene2201	FE46_RS10900	NZ_CP007627.1	complement(2466878..2467228)	351	69.9635	84.0626	0.998057	50S ribosomal L18
gene274	FE46_RS01345	NZ_CP007627.1	317744..318913	1170	1.67912	2.0175	0.994674	hypothetical protein
gene1871	FE46_RS09255	NZ_CP007627.1	2105662..2106057	396	0.826842	0.993468	0.993468	N/A
gene1809	FE46_RS08950	NZ_CP007627.1	2043663..2044058	396	0.826842	0.993468	0.993468	N/A
gene1016	FE46_RS05030	NZ_CP007627.1	complement(1170836..1171234)	399	0.820625	0.985998	0.985998	N/A
gene2286	FE46_RS11325	NZ_CP007627.1	complement(2554732..2556426)	1695	30.4248	36.5561	0.984975	tetratricopeptide repeat
gene2074	FE46_RS10265	NZ_CP007627.1	complement(2332960..2334321)	1362	5.64948	6.78797	0.982276	cystathionine beta-synthase
gene1964	FE46_RS09720	NZ_CP007627.1	2204695..2204895	201	0.814501	0.97864	0.97864	N/A
gene539	FE46_RS02665	NZ_CP007627.1	629569..631677	2109	0.388133	0.46635	0.978096	N/A
gene113	FE46_RS00570	NZ_CP007627.1	complement(141369..142217)	849	0.771329	0.926768	0.978096	N/A
gene1533	FE46_RS07575	NZ_CP007627.1	complement(1745569..1746882)	1314	1.49511	1.79641	0.978096	tetratricopeptide repeat
gene1122	FE46_RS05560	NZ_CP007627.1	complement(1281189..1281563)	375	5.67544	6.81916	0.978096	T9SS type A sorting domain-containing
gene279	FE46_RS01370	NZ_CP007627.1	complement(324003..324929)	927	2.82571	3.39515	0.978096	DUF58 domain-containing protein
gene903	FE46_RS04470	NZ_CP007627.1	complement(1048908..1049513)	606	2.70156	3.24598	0.978096	trimeric intracellular cation channel family
gene481	FE46_RS02375	NZ_CP007627.1	complement(566911..567786)	876	0.934444	1.12275	0.978096	branched-chain amino acid transaminase
gene28	FE46_RS00145	NZ_CP007627.1	50444..50641	198	2.48053	2.9804	0.978096	Uncharacterised protein
gene273	FE46_RS01340	NZ_CP007627.1	316874..317686	813	0.805484	0.967806	0.967806	N/A
gene1997	FE46_RS09885	NZ_CP007627.1	2242938..2244161	1224	0.802523	0.964248	0.964248	N/A
gene662	FE46_RS03280	NZ_CP007627.1	complement(785247..786149)	903	4.16992	5.01025	0.961377	protoheme IX farnesyltransferase
gene2421	FE46_RS11995	NZ_CP007627.1	2713753..2715786	2034	2.49516	2.99799	0.959525	family competence
gene1978	FE46_RS09790	NZ_CP007627.1	complement(2218499..2218966)	468	14.3425	17.2328	0.959377	hypothetical protein
gene2425	FE46_RS12015	NZ_CP007627.1	complement(2718486..2720162)	1677	3.80732	4.57457	0.958436	peptide MFS transporter
gene983	FE46_RS04865	NZ_CP007627.1	1127084..1127494	411	0.796665	0.95721	0.95721	N/A
gene1585	FE46_RS07835	NZ_CP007627.1	1802060..1803274	1215	9.70161	11.6567	0.956833	methyltransferase domain-containing
gene2153	FE46_RS10660	NZ_CP007627.1	complement(2417991..2420351)	2361	2.42694	2.91602	0.956239	tyrosine kinase
gene2170	FE46_RS10745	NZ_CP007627.1	complement(2436029..2437468)	1440	0.795835	0.956213	0.956213	N/A
gene1300	FE46_RS06425	NZ_CP007627.1	1477370..1480459	3090	0.794731	0.954886	0.954886	N/A
gene102	FE46_RS00515	NZ_CP007627.1	129856..130725	870	24.8395	29.8451	0.952129	putative lipoprotein
gene1679	FE46_RS08305	NZ_CP007627.1	complement(1907823..1909181)	1359	0.843269	1.01321	0.950927	peptidase S41
gene2321	FE46_RS11495	NZ_CP007627.1	2597347..2600124	2778	4.7146	5.6647	0.947309	N/A
gene1514	FE46_RS07480	NZ_CP007627.1	1724550..1724966	417	0.785202	0.943437	0.943437	N/A
gene3	FE46_RS00020	NZ_CP007627.1	5994..6842	849	1.92832	2.31692	0.940477	class I SAM-dependent methyltransferase
gene1409	FE46_RS06970	NZ_CP007627.1	1606873..1608264	1392	3.41072	4.09805	0.933052	redoxin domain-containing
gene1449	FE46_RS07155	NZ_CP007627.1	1642679..1642876	198	89.2989	107.294	0.921766	50S ribosomal L35
gene1037	FE46_RS05135	NZ_CP007627.1	complement(1188698..1189894)	1197	0.410312	0.492999	0.916965	N/A
gene1549	FE46_RS07655	NZ_CP007627.1	1764120..1764626	507	0.968726	1.16394	0.916965	hypothetical protein
gene1019	FE46_RS05045	NZ_CP007627.1	complement(1173349..1174122)	774	1.26911	1.52486	0.916965	nucleoside triphosphate pyrophosphohydrolase
gene1857	FE46_RS09185	NZ_CP007627.1	2094902..2095450	549	0.894616	1.0749	0.916965	DUF1599 domain-containing
gene2300	FE46_RS11390	NZ_CP007627.1	complement(2570477..2571112)	636	24.9691	30.0008	0.915785	50S ribosomal L21
gene975	FE46_RS04825	NZ_CP007627.1	1118165..1120582	2418	10.156	12.2026	0.912403	family
gene2395	FE46_RS11865	NZ_CP007627.1	2687425..2690913	3489	1.17308	1.40948	0.912403	T9SS type B sorting domain-containing
gene1962	FE46_RS09710	NZ_CP007627.1	complement(2202767..2203717)	951	2.23795	2.68894	0.908232	family
gene2450	FE46_RS12130	NZ_CP007627.1	complement(2739100..2739975)	876	7.28867	8.75748	0.903928	Cell division
gene251	FE46_RS01245	NZ_CP007627.1	296961..297893	933	2.4566	2.95165	0.900878	bifunctional riboflavin kinase/FAD synthetase
gene1878	FE46_RS09290	NZ_CP007627.1	complement(2108380..2109522)	1143	1.28909	1.54887	0.898252	Lycopene cyclase
gene2154	FE46_RS10665	NZ_CP007627.1	complement(2420360..2421157)	798	0.820625	0.985998	0.889178	sugar transporter
gene1427	FE46_RS07055	NZ_CP007627.1	1623074..1623490	417	6.28162	7.54749	0.889178	large conductance mechanosensitive channel
gene79	FE46_RS00400	NZ_CP007627.1	complement(102057..102548)	492	0.665507	0.79962	0.889178	N/A
gene880	FE46_RS04365	NZ_CP007627.1	1024195..1025280	1086	8.29126	9.96212	0.887711	peptidylprolyl isomerase
gene914	FE46_RS04525	NZ_CP007627.1	complement(1058933..1060138)	1206	1.49325	1.79417	0.88189	NO-inducible flavohemo
gene693	FE46_RS03435	NZ_CP007627.1	815176..816231	1056	4.18589	5.02943	0.880287	hypothetical protein
gene560	FE46_RS02770	NZ_CP007627.1	complement(656575..659274)	2700	0.727621	0.874251	0.874251	N/A
gene2102	FE46_RS10405	NZ_CP007627.1	2366709..2367347	639	1.28102	1.53918	0.8733	hypothetical protein
gene2469	FE46_RS12225	NZ_CP007627.1	complement(2760980..2761981)	1002	2.12404	2.55208	0.870908	ketoacyl-ACP synthase III
gene69	FE46_RS00350	NZ_CP007627.1	complement(89917..90696)	780	5.45716	6.55689	0.870908	16S rRNA (adenine(1518)-N(6)/adenine(1519)-N(6))-dimethyltransferase RsmA
gene2121	FE46_RS10500	NZ_CP007627.1	complement(2384492..2385397)	906	0.722802	0.868462	0.868462	N/A
gene743	FE46_RS03680	NZ_CP007627.1	complement(865209..865820)	612	2.94258	3.53558	0.867666	HAD family phosphatase
gene1521	FE46_RS07515	NZ_CP007627.1	complement(1730999..1732132)	1134	0.721846	0.867313	0.867313	N/A
gene1613	FE46_RS07975	NZ_CP007627.1	1838912..1840036	1125	29.978	36.0192	0.866242	molecular chaperone
gene759	FE46_RS03760	NZ_CP007627.1	882417..884309	1893	1.47023	1.76651	0.866023	ATP-dependent DNA helicase 2
gene2235	FE46_RS11070	NZ_CP007627.1	complement(2495974..2496981)	1008	2.76106	3.31747	0.866023	GTPase
gene2546	FE46_RS12605	NZ_CP007627.1	complement(2849877..2851067)	1191	0.412379	0.495483	0.863026	N/A
gene1256	FE46_RS06220	NZ_CP007627.1	complement(1433497..1434186)	690	0.711803	0.855246	0.863026	N/A
gene775	FE46_RS03840	NZ_CP007627.1	complement(897360..897815)	456	0.718047	0.862748	0.862748	N/A
gene2190	FE46_RS10845	NZ_CP007627.1	complement(2460958..2461446)	489	52.5628	63.1553	0.861735	50S ribosomal L17
gene61	FE46_RS00310	NZ_CP007627.1	complement(80640..81680)	1041	2.04447	2.45647	0.859139	aldo/keto reductase
gene1058	FE46_RS05240	NZ_CP007627.1	1215068..1215880	813	23.1577	27.8244	0.857325	M48 family metallopeptidase
gene588	FE46_RS02910	NZ_CP007627.1	690588..690848	261	4.39081	5.27566	0.855834	hypothetical protein
gene2023	FE46_RS10015	NZ_CP007627.1	2273221..2273514	294	21.1604	25.4247	0.852469	cell division
gene114	FE46_RS00575	NZ_CP007627.1	142326..143135	810	20.4138	24.5276	0.848692	Glycogen synthase
gene451	FE46_RS02225	NZ_CP007627.1	complement(530755..532146)	1392	0.705667	0.847873	0.847873	N/A
gene2414	FE46_RS11960	NZ_CP007627.1	complement(2705795..2706949)	1155	0.708721	0.851544	0.843186	beta-ketoacyl synthase
gene998	FE46_RS04940	NZ_CP007627.1	1141344..1142546	1203	0.680443	0.817567	0.843186	N/A
gene1062	FE46_RS05260	NZ_CP007627.1	1221521..1222201	681	1.20202	1.44425	0.843186	Cytidylate kinase
gene1807	FE46_RS08940	NZ_CP007627.1	2041370..2041603	234	0.699635	0.840626	0.840626	N/A
gene653	FE46_RS03235	NZ_CP007627.1	complement(777836..779278)	1443	9.30326	11.1781	0.838953	family
gene235	FE46_RS01165	NZ_CP007627.1	271654..275055	3402	2.88738	3.46925	0.838368	isoleucine--tRNA ligase
gene123	FE46_RS00615	NZ_CP007627.1	154465..155622	1158	0.848262	1.01921	0.838368	8-amino-7-oxononanoate synthase
gene2206	FE46_RS10925	NZ_CP007627.1	complement(2469165..2469479)	315	45.2164	54.3285	0.837543	50S ribosomal L24
gene1159	FE46_RS05745	NZ_CP007627.1	complement(1319913..1320617)	705	0.696658	0.837049	0.837049	N/A
gene1882	FE46_RS09310	NZ_CP007627.1	2112858..2113298	441	24.5015	29.4391	0.831886	Beta-carotene hydroxylase
gene1447	FE46_RS07145	NZ_CP007627.1	1640059..1642005	1947	9.50167	11.4165	0.831014	threonine--tRNA ligase
gene1265	FE46_RS13005	NZ_CP007627.1	complement(1444752..1444988)	237	0.690779	0.829986	0.829986	N/A
gene1899	FE46_RS09395	NZ_CP007627.1	2128496..2128732	237	0.690779	0.829986	0.829986	N/A
gene230	FE46_RS01140	NZ_CP007627.1	complement(268207..268680)	474	0.690779	0.829986	0.829986	N/A
gene1208	FE46_RS05990	NZ_CP007627.1	1370436..1373423	2988	1.09581	1.31664	0.828895	adenine methyltransferase
gene1508	FE46_RS07450	NZ_CP007627.1	1719707..1721494	1788	6.77566	8.1411	0.828136	ATP-binding cassette domain-containing
gene1151	FE46_RS05705	NZ_CP007627.1	complement(1311943..1313229)	1287	2.92575	3.51535	0.827067	Para-aminobenzoate synthase component I
gene681	FE46_RS03375	NZ_CP007627.1	804758..805102	345	16.6087	19.9557	0.826893	phage holin family
gene2343	FE46_RS11605	NZ_CP007627.1	complement(2631899..2632525)	627	14.0998	16.9412	0.822698	porin family
gene1605	FE46_RS07935	NZ_CP007627.1	complement(1831987..1832823)	837	5.86791	7.05042	0.819634	DUF2807 domain-containing
gene997	FE46_RS04935	NZ_CP007627.1	1140129..1141238	1110	7.22704	8.68344	0.817862	Collagenase precursor
gene688	FE46_RS03410	NZ_CP007627.1	810728..811771	1044	7.99755	9.60923	0.817753	23S rRNA (adenine(2503)-C(2))-methyltransferase
gene1966	FE46_RS09730	NZ_CP007627.1	2206033..2206956	924	0.531541	0.638658	0.81508	N/A
gene1338	FE46_RS06615	NZ_CP007627.1	complement(1522145..1522927)	783	1.4636	1.75855	0.81508	acyl-ACP--UDP-N-acetylglucosamine O-acyltransferase
gene509	FE46_RS02515	NZ_CP007627.1	complement(598656..599042)	387	1.26911	1.52486	0.81508	transposase family
gene353	FE46_RS01745	NZ_CP007627.1	complement(418965..419294)	330	1.98442	2.38432	0.81508	2TM domain-containing
gene1312	FE46_RS06485	NZ_CP007627.1	1495749..1497011	1263	2.85172	3.4264	0.81508	mechanosensitive ion channel
gene1277	FE46_RS06310	NZ_CP007627.1	complement(1455168..1455446)	279	4.69433	5.64033	0.81508	DUF2089 family
gene395	FE46_RS01955	NZ_CP007627.1	466147..466479	333	2.45818	2.95355	0.81508	MGMT family
gene1812	FE46_RS08975	NZ_CP007627.1	2045553..2046383	831	1.97009	2.36711	0.81508	Bro-N domain-containing
gene1735	FE46_RS08585	NZ_CP007627.1	1964915..1965118	204	1.60505	1.9285	0.81508	hypothetical protein
gene433	FE46_RS02140	NZ_CP007627.1	complement(513046..513303)	258	14.5947	17.5359	0.81508	Hypothetical lipo precursor
gene749	FE46_RS03710	NZ_CP007627.1	complement(871289..872188)	900	1.27334	1.52994	0.81508	site-specific tyrosine recombinase
gene1002	FE46_RS04960	NZ_CP007627.1	1147515..1149335	1821	0.539422	0.648127	0.81508	N/A
gene341	FE46_RS01680	NZ_CP007627.1	complement(398082..398426)	345	0.474535	0.570164	0.81508	N/A
gene317	FE46_RS01560	NZ_CP007627.1	370848..371144	297	12.127	14.5709	0.808952	thioredoxin family protein
gene1798	FE46_RS08895	NZ_CP007627.1	complement(2034016..2034252)	237	11.7432	14.1098	0.807167	Hypothetical transmembrane
gene2463	FE46_RS12195	NZ_CP007627.1	complement(2754725..2756095)	1371	2.8659	3.44344	0.803915	saccharopine dehydrogenase
gene838	FE46_RS04155	NZ_CP007627.1	complement(971747..972355)	609	3.2259	3.87599	0.803915	hypothetical protein
gene348	FE46_RS01720	NZ_CP007627.1	complement(413026..415557)	2532	0.646582	0.776882	0.801718	N/A
gene64	FE46_RS00325	NZ_CP007627.1	83806..85611	1806	6.16423	7.40645	0.797489	lysophospholipid acyltransferase family protein
gene1615	FE46_RS07985	NZ_CP007627.1	1841208..1842512	1305	1.88178	2.261	0.797361	ABC transporter permease
gene1131	FE46_RS05605	NZ_CP007627.1	complement(1289125..1290144)	1020	5.29665	6.36404	0.795004	heme A synthase
gene888	FE46_RS04405	NZ_CP007627.1	1033047..1035443	2397	0.751298	0.9027	0.791107	N/A
gene2502	FE46_RS12390	NZ_CP007627.1	complement(2797278..2799152)	1875	1.8336	2.20311	0.790001	cell envelope biogenesis
gene1324	FE46_RS06545	NZ_CP007627.1	complement(1505992..1506435)	444	1.84363	2.21516	0.788787	Uncharacterized membrane
gene2579	FE46_RS12770	NZ_CP007627.1	complement(2884610..2886766)	2157	2.80827	3.3742	0.78673	RNA-binding transcriptional accessory
gene1719	FE46_RS08505	NZ_CP007627.1	complement(1949179..1950558)	1380	0.474535	0.570164	0.782477	N/A
gene1683	FE46_RS08325	NZ_CP007627.1	complement(1911973..1912779)	807	1.62295	1.95	0.782477	phosphatidate cytidylyltransferase
gene2277	FE46_RS11280	NZ_CP007627.1	complement(2545040..2545534)	495	1.32295	1.58955	0.782477	family cysteine cluster
gene1064	FE46_RS05270	NZ_CP007627.1	complement(1223577..1223984)	408	4.41388	5.30336	0.779642	DNA primase
gene1149	FE46_RS05695	NZ_CP007627.1	complement(1308410..1310422)	2013	3.82245	4.59275	0.776529	Thiol:disulfide interchange
gene566	FE46_RS02800	NZ_CP007627.1	666378..667580	1203	1.36089	1.63513	0.776267	hypothetical protein
gene128	FE46_RS00640	NZ_CP007627.1	complement(158756..159775)	1020	1.92605	2.3142	0.772181	phenylalanine--tRNA ligase subunit alpha
gene1576	FE46_RS07790	NZ_CP007627.1	complement(1794551..1795939)	1389	7.18977	8.63866	0.770851	Dihydrolipoyl dehydrogenase
gene2029	FE46_RS10040	NZ_CP007627.1	2279079..2280125	1047	1.72002	2.06664	0.768504	endonuclease
gene131	FE46_RS00655	NZ_CP007627.1	complement(160929..161672)	744	2.42051	2.9083	0.768504	BatE protein
gene2559	FE46_RS12670	NZ_CP007627.1	complement(2864001..2864384)	384	4.68974	5.63482	0.768504	polymer-forming cytoskeletal
gene1234	FE46_RS13210	NZ_CP007627.1	1402700..1402955	256	0.63951	0.768385	0.768385	N/A
gene2296	FE46_RS11375	NZ_CP007627.1	complement(2566417..2567499)	1083	7.86072	9.44482	0.768293	agmatinase family
gene673	FE46_RS03335	NZ_CP007627.1	complement(797995..798735)	741	5.74437	6.90199	0.765979	isoprenyl transferase
gene613	FE46_RS03030	NZ_CP007627.1	complement(720967..721749)	783	1.04543	1.25611	0.764138	hypothetical protein FPSM_00632
aroE	aroE	NZ_CP007627.1	1154283..1155020	738	1.10918	1.3327	0.764138	N/A
gene946	FE46_RS04680	NZ_CP007627.1	1089585..1089971	387	12.268	14.7403	0.762494	bacillithiol system redox-active
gene1843	FE46_RS09115	NZ_CP007627.1	complement(2079726..2080856)	1131	2.89504	3.47845	0.758214	sugar O-acetyltransferase
gene98	FE46_RS00495	NZ_CP007627.1	126619..127140	522	0.627259	0.753665	0.753665	N/A
gene1143	FE46_RS05665	NZ_CP007627.1	1301865..1302638	774	0.423035	0.508286	0.752382	N/A
gene2533	FE46_RS12545	NZ_CP007627.1	complement(2836825..2837598)	774	2.96125	3.558	0.752382	DUF4292 domain-containing
gene2139	FE46_RS10590	NZ_CP007627.1	complement(2403501..2404403)	903	0.725203	0.871347	0.752382	glycosyltransferase family 2
gene1293	FE46_RS06390	NZ_CP007627.1	1468436..1468810	375	0.873145	1.0491	0.752382	pre translocase subunit
gene530	FE46_RS02620	NZ_CP007627.1	complement(618833..619651)	819	0.399792	0.480358	0.752382	N/A
gene58	FE46_RS00295	NZ_CP007627.1	78178..79197	1020	15.0874	18.1279	0.747488	Hypothetical transmembrane protein
gene1102	FE46_RS05460	NZ_CP007627.1	complement(1262314..1262514)	201	91.2241	109.608	0.744204	heavy-metal-associated domain-containing
gene452	FE46_RS02230	NZ_CP007627.1	complement(532150..533508)	1359	0.602335	0.723718	0.740982	N/A
gene2240	FE46_RS11095	NZ_CP007627.1	2499913..2500443	531	0.616628	0.740891	0.740891	N/A
gene1471	FE46_RS07265	NZ_CP007627.1	complement(1672209..1673276)	1068	14.7159	17.6815	0.739348	cystathionine beta-synthase
gene1756	FE46_RS08685	NZ_CP007627.1	complement(1984451..1984723)	273	4.7975	5.7643	0.738186	N/A
gene1107	FE46_RS05485	NZ_CP007627.1	complement(1265481..1265720)	240	9.55002	11.4746	0.736201	family
gene2459	FE46_RS12175	NZ_CP007627.1	2749541..2750728	1188	3.9964	4.80176	0.734839	aminopeptidase
gene39	FE46_RS12860	NZ_CP007627.1	complement(59786..60589)	804	0.610876	0.73398	0.73398	N/A
gene2456	FE46_RS12160	NZ_CP007627.1	2746504..2746980	477	3.08896	3.71144	0.733572	transcription elongation factor
gene732	FE46_RS03625	NZ_CP007627.1	complement(856623..857078)	456	81.1393	97.4905	0.729056	GAF domain-containing
gene1321	FE46_RS06530	NZ_CP007627.1	complement(1502509..1503549)	1041	1.10087	1.32271	0.72837	Histidinol-phosphate aminotransferase
gene678	FE46_RS03360	NZ_CP007627.1	complement(802244..802879)	636	1.02965	1.23715	0.724516	ABC transporter ATP-binding
gene1078	FE46_RS05340	NZ_CP007627.1	complement(1240984..1241241)	258	10.1528	12.1989	0.724516	hypothetical protein
gene2113	FE46_RS10460	NZ_CP007627.1	2377039..2377863	825	0.793768	0.953729	0.724516	twin-arginine translocase subunit
gene2354	FE46_RS11660	NZ_CP007627.1	complement(2639681..2640946)	1266	0.517266	0.621506	0.724516	N/A
gene1865	FE46_RS09225	NZ_CP007627.1	complement(2100175..2101431)	1257	1.69315	2.03436	0.722457	competence damage-inducible A
gene18	FE46_RS00095	NZ_CP007627.1	36119..38215	2097	3.43512	4.12737	0.722084	LysM peptidoglycan-binding domain-containing protein
gene2258	FE46_RS11185	NZ_CP007627.1	complement(2519532..2520311)	780	1.88902	2.26969	0.721546	DUF4145 domain-containing
gene1655	FE46_RS13245	NZ_CP007627.1	1880210..1880755	546	0.599687	0.720537	0.720537	N/A
gene2580	FE46_RS12775	NZ_CP007627.1	2887039..2887311	273	0.599687	0.720537	0.720537	N/A
gene354	FE46_RS01750	NZ_CP007627.1	complement(419359..422043)	2685	1.52434	1.83153	0.719188	N/A
gene101	FE46_RS00510	NZ_CP007627.1	128628..129584	957	3.42141	4.1109	0.719188	hypothetical protein
gene1659	FE46_RS08205	NZ_CP007627.1	1883778..1884329	552	0.593169	0.712705	0.712705	N/A
gene1823	N/A	NZ_CP007627.1	complement(2056937..2059828)	2892	7684.57	9233.17	0.711605	N/A
gene1942	FE46_RS09610	NZ_CP007627.1	complement(2177217..2177912)	696	11.2907	13.566	0.711343	family
gene654	FE46_RS03240	NZ_CP007627.1	779427..780821	1395	1.17358	1.41008	0.708765	DUF4403 family
gene1634	FE46_RS08080	NZ_CP007627.1	1856597..1857625	1029	1.59101	1.91163	0.708765	M28 family peptidase
gene664	FE46_RS03290	NZ_CP007627.1	complement(787002..787355)	354	5.08718	6.11235	0.707833	domain-containing
gene601	FE46_RS02970	NZ_CP007627.1	703664..703942	279	0.586791	0.705042	0.705042	N/A
gene1790	FE46_RS08855	NZ_CP007627.1	2025132..2026718	1587	7.53067	9.04825	0.704152	multidrug efflux MFS transporter
gene1797	FE46_RS08890	NZ_CP007627.1	complement(2033564..2033929)	366	0.894616	1.0749	0.69864	hypothetical protein
gene2304	FE46_RS11410	NZ_CP007627.1	complement(2576271..2576591)	321	1.02003	1.22559	0.69864	NADH-quinone oxidoreductase subunit
gene733	FE46_RS03630	NZ_CP007627.1	857152..857691	540	1.51588	1.82136	0.69864	exosortase family
gene231	FE46_RS01145	NZ_CP007627.1	268750..269256	507	1.29163	1.55193	0.69864	DUF456 domain-containing protein
gene992	FE46_RS04910	NZ_CP007627.1	1134681..1135208	528	70.695	84.9415	0.69864	ferritin
gene127	FE46_RS00635	NZ_CP007627.1	complement(158156..158566)	411	2.38999	2.87163	0.69864	phenylalanyl-tRNA synthetase subunit alpha
gene824	FE46_RS04085	NZ_CP007627.1	complement(956713..957129)	417	1.1778	1.41516	0.69864	hypothetical protein
gene374	FE46_RS01850	NZ_CP007627.1	complement(444354..445199)	846	0.580548	0.697541	0.697541	N/A
gene1168	FE46_RS05790	NZ_CP007627.1	complement(1333692..1335464)	1773	2.30844	2.77364	0.694671	MFS transporter
gene958	FE46_RS04740	NZ_CP007627.1	1100779..1101564	786	12.4973	15.0158	0.690421	sulfite exporter family
gene948	FE46_RS04690	NZ_CP007627.1	1090255..1090479	225	8.00383	9.61677	0.689683	hypothetical protein
gene212	FE46_RS01050	NZ_CP007627.1	complement(252530..252997)	468	9.44508	11.3485	0.687724	CYTH domain-containing protein
gene2485	FE46_RS12305	NZ_CP007627.1	complement(2775986..2776315)	330	60.5248	72.7218	0.684219	iron-sulfur cluster assembly accessory
gene1699	FE46_RS08405	NZ_CP007627.1	complement(1929864..1930151)	288	0.568454	0.683009	0.683009	N/A
gene1782	FE46_RS08815	NZ_CP007627.1	2016946..2017728	783	6.48168	7.78787	0.682905	indole-3-glycerol phosphate synthase
gene949	FE46_RS04695	NZ_CP007627.1	complement(1090797..1091981)	1185	6.63148	7.96786	0.682393	Probable lipo precursor
gene370	FE46_RS01830	NZ_CP007627.1	440825..441349	525	1.87102	2.24808	0.682393	16S rRNA processing
gene1356	FE46_RS06705	NZ_CP007627.1	1543447..1544313	867	0.566487	0.680646	0.680646	N/A
gene974	FE46_RS04820	NZ_CP007627.1	1117771..1118028	258	29.824	35.8341	0.680037	DUF4834 domain-containing
gene151	FE46_RS00745	NZ_CP007627.1	complement(179167..179748)	582	1.40648	1.68992	0.679233	nicotinate-nucleotide adenylyltransferase
gene868	FE46_RS04305	NZ_CP007627.1	1008591..1009862	1272	9.9104	11.9076	0.677279	adenylosuccinate synthase
gene2022	FE46_RS10010	NZ_CP007627.1	2272922..2273212	291	0.562593	0.675968	0.675968	N/A
gene2411	FE46_RS11945	NZ_CP007627.1	complement(2700885..2701349)	465	5.28112	6.34537	0.673002	IS982 family transposase
gene1686	FE46_RS08340	NZ_CP007627.1	complement(1915438..1915809)	372	36.0876	43.3601	0.672851	ribosome silencing factor
gene1060	FE46_RS05250	NZ_CP007627.1	1217682..1220132	2451	6.14514	7.38352	0.672533	endopeptidase La
gene1803	FE46_RS08920	NZ_CP007627.1	2037478..2038647	1170	0.559708	0.672501	0.672501	N/A
gene1207	FE46_RS05985	NZ_CP007627.1	1370137..1370430	294	0.556853	0.66907	0.66907	N/A
gene52	FE46_RS00265	NZ_CP007627.1	complement(72157..72567)	411	75.6832	90.9349	0.667523	BrxA/BrxB family bacilliredoxin
gene779	FE46_RS03860	NZ_CP007627.1	900230..900775	546	0.899531	1.08081	0.666884	acyl- thioesterase
gene1369	FE46_RS06770	NZ_CP007627.1	complement(1559021..1561087)	2067	0.554428	0.666157	0.666157	N/A
gene2266	FE46_RS11225	NZ_CP007627.1	complement(2527622..2531458)	3837	7.80813	9.38163	0.664408	type IX secretion system sortase
gene138	FE46_RS13105	NZ_CP007627.1	complement(170201..170387)	187	7.00384	8.41525	0.663116	N/A
gene2116	FE46_RS10475	NZ_CP007627.1	complement(2379633..2380448)	816	1.00315	1.20531	0.660876	glycoside hydrolase family 25
gene1959	FE46_RS09695	NZ_CP007627.1	2199200..2200288	1089	6.31406	7.58648	0.660451	M42 family metallopeptidase
gene2020	FE46_RS10000	NZ_CP007627.1	complement(2268579..2271035)	2457	0.732951	0.880656	0.65604	N/A
gene1472	FE46_RS07270	NZ_CP007627.1	complement(1673330..1675390)	2061	2.70078	3.24504	0.654631	S9 family peptidase
gene1606	FE46_RS07940	NZ_CP007627.1	complement(1832898..1833638)	741	15.2447	18.3168	0.652695	DUF2807 domain-containing
gene2364	FE46_RS11710	NZ_CP007627.1	complement(2648496..2650151)	1656	0.395446	0.475137	0.652064	N/A
gene2108	FE46_RS10435	NZ_CP007627.1	complement(2372272..2372538)	267	1.22633	1.47346	0.652064	plasmid stabilization
gene1368	FE46_RS06765	NZ_CP007627.1	1558618..1558856	239	4.10999	4.93824	0.652064	hexameric tyrosine-coordinated heme (HTHP)
gene1961	FE46_RS09705	NZ_CP007627.1	complement(2201644..2202459)	816	0.802523	0.964248	0.652064	SDR family NAD(P)-dependent oxidoreductase
gene271	FE46_RS01330	NZ_CP007627.1	complement(314851..315687)	837	0.391194	0.470028	0.652064	N/A
gene2357	FE46_RS11675	NZ_CP007627.1	complement(2642772..2644049)	1278	0.512409	0.61567	0.652064	N/A
gene1849	FE46_RS09145	NZ_CP007627.1	complement(2085074..2088199)	3126	10.3173	12.3964	0.651403	cytochrome C biogenesis
gene1861	FE46_RS09205	NZ_CP007627.1	complement(2098259..2099212)	954	4.97665	5.97955	0.647598	signal recognition particle-docking
gene2158	FE46_RS10685	NZ_CP007627.1	complement(2425215..2425943)	729	2.02117	2.42848	0.64727	SDR family oxidoreductase
gene1532	FE46_RS07570	NZ_CP007627.1	1745086..1745466	381	3.86728	4.64661	0.64727	family
gene714	FE46_RS03540	NZ_CP007627.1	838457..839857	1401	1.86969	2.24647	0.646675	cell division
gene301	FE46_RS01480	NZ_CP007627.1	347743..349515	1773	6.00195	7.21147	0.64479	1-deoxy-D-xylulose-5-phosphate synthase
gene722	FE46_RS03580	NZ_CP007627.1	complement(846461..848596)	2136	17.3219	20.8126	0.643335	polyribonucleotide nucleotidyltransferase
gene2585	FE46_RS12800	NZ_CP007627.1	2891932..2892603	672	6.3342	7.61067	0.642184	DUF2807 domain-containing
gene1834	FE46_RS09075	NZ_CP007627.1	complement(2069869..2070252)	384	15.7746	18.9535	0.641659	DUF1573 domain-containing
gene430	FE46_RS02125	NZ_CP007627.1	complement(509150..510379)	1230	0.532405	0.639696	0.639696	N/A
gene222	FE46_RS01100	NZ_CP007627.1	260763..262193	1431	20.593	24.743	0.639279	pyruvate kinase
gene1134	FE46_RS05620	NZ_CP007627.1	complement(1292285..1293388)	1104	0.889754	1.06906	0.637889	Glycosyl group 2 family
gene945	FE46_RS04675	NZ_CP007627.1	1088821..1089522	702	35.6814	42.8719	0.636262	response regulator transcription factor
gene497	FE46_RS02455	NZ_CP007627.1	complement(583837..584430)	594	23.4272	28.1482	0.634643	family
gene676	FE46_RS03350	NZ_CP007627.1	complement(800522..801181)	660	1.73637	2.08628	0.633951	CBS domain-containing
gene1115	FE46_RS05525	NZ_CP007627.1	complement(1273908..1276181)	2274	1.94384	2.33557	0.631785	T9SS type B sorting domain-containing
gene2572	FE46_RS12735	NZ_CP007627.1	complement(2878204..2879058)	855	1.53183	1.84053	0.63103	dTDP-4-dehydrorhamnose reductase
gene1250	FE46_RS06195	NZ_CP007627.1	complement(1424031..1424342)	312	0.524726	0.63047	0.63047	N/A
gene533	FE46_RS02635	NZ_CP007627.1	complement(621590..621901)	312	0.524726	0.63047	0.63047	N/A
gene2030	FE46_RS10045	NZ_CP007627.1	2280369..2280647	279	12.3226	14.8059	0.630062	DUF2805 domain-containing
gene1142	FE46_RS05660	NZ_CP007627.1	1300927..1301865	939	0.52305	0.628456	0.628456	N/A
gene973	FE46_RS04815	NZ_CP007627.1	complement(1116594..1117664)	1071	0.764307	0.918331	0.626985	transporter
gene794	FE46_RS03930	NZ_CP007627.1	complement(915266..916078)	813	3.02057	3.62927	0.626985	DUF2490 domain-containing
gene53	FE46_RS00270	NZ_CP007627.1	complement(72730..73419)	690	6.64349	7.9823	0.625267	HAD family hydrolase
gene1991	FE46_RS09855	NZ_CP007627.1	complement(2232590..2233462)	873	1.12519	1.35194	0.624317	cyanophycinase
gene1403	FE46_RS06940	NZ_CP007627.1	1599785..1602205	2421	4.32786	5.20001	0.623488	phenylalanine--tRNA ligase subunit beta
gene1702	FE46_RS08420	NZ_CP007627.1	1932870..1933217	348	6.11578	7.34823	0.623297	helix-turn-helix transcriptional regulator
gene1364	FE46_RS06745	NZ_CP007627.1	1553847..1555424	1578	0.518741	0.623278	0.623278	N/A
gene916	FE46_RS04535	NZ_CP007627.1	1061214..1062161	948	0.518084	0.622489	0.622489	N/A
gene1906	FE46_RS09430	NZ_CP007627.1	complement(2135519..2136403)	885	1.29492	1.55587	0.622425	bifunctional 5,10-methylene-tetrahydrofolate dehydrogenase 5,10-methylene-tetrahydrofolate cyclohydrolase
gene1573	FE46_RS07775	NZ_CP007627.1	complement(1790610..1791104)	495	2.31516	2.78171	0.622425	metallophosphoesterase family
gene139	FE46_RS13110	NZ_CP007627.1	complement(170396..170582)	187	6.12836	7.36335	0.622425	hypothetical protein, partial
gene208	FE46_RS01030	NZ_CP007627.1	246750..247700	951	4.64805	5.58473	0.61992	L-threonine 3-dehydrogenase
gene1924	FE46_RS09520	NZ_CP007627.1	complement(2154866..2155252)	387	3.80732	4.57457	0.61992	acyl- thioesterase
gene1787	FE46_RS08840	NZ_CP007627.1	2021894..2022517	624	5.50963	6.61993	0.618675	family transcriptional regulator
gene2059	FE46_RS10190	NZ_CP007627.1	complement(2323419..2323970)	552	15.719	18.8867	0.618605	transcription termination antitermination factor
gene1560	FE46_RS07710	NZ_CP007627.1	1771740..1772600	861	6.46492	7.76774	0.618128	family
gene1976	FE46_RS09780	NZ_CP007627.1	2217240..2217560	321	0.510014	0.612793	0.612793	N/A
gene1522	FE46_RS07520	NZ_CP007627.1	complement(1732146..1732661)	516	0.951829	1.14364	0.61131	lipocalin-like domain-containing
gene1095	FE46_RS05425	NZ_CP007627.1	complement(1257657..1257836)	180	2.72858	3.27844	0.61131	sterol desaturase family
gene60	FE46_RS00305	NZ_CP007627.1	80280..80639	360	1.36429	1.63922	0.61131	YraN family protein
gene1558	FE46_RS07700	NZ_CP007627.1	1770852..1771079	228	0.718047	0.862748	0.61131	membrane
gene1353	FE46_RS06690	NZ_CP007627.1	complement(1541525..1542085)	561	1.16731	1.40254	0.61131	Hypothetical protein FPSM_01391
gene2436	FE46_RS12060	NZ_CP007627.1	complement(2729178..2729576)	399	0.410312	0.492999	0.61131	N/A
gene1129	FE46_RS05595	NZ_CP007627.1	1287393..1288154	762	3.43758	4.13032	0.606571	response regulator transcription factor
gene1654	FE46_RS08180	NZ_CP007627.1	1878587..1879975	1389	5.65753	6.79764	0.606571	tRNA modification GTPase
gene55	FE46_RS12865	NZ_CP007627.1	complement(74102..75466)	1365	1.79906	2.16161	0.606258	ATP-binding protein
gene855	FE46_RS04240	NZ_CP007627.1	complement(994591..995952)	1362	1.32222	1.58867	0.604441	exonuclease
gene2069	FE46_RS10240	NZ_CP007627.1	complement(2327852..2329021)	1170	19.0301	22.865	0.603544	acyl- dehydrogenase
gene475	FE46_RS02345	NZ_CP007627.1	complement(559208..560452)	1245	2.36696	2.84395	0.602936	MFS transporter
gene1397	FE46_RS06910	NZ_CP007627.1	1592958..1594082	1125	0.873145	1.0491	0.598834	NAD-dependent epimerase dehydratase family
gene1887	FE46_RS09335	NZ_CP007627.1	complement(2115935..2116996)	1062	2.62067	3.14879	0.598116	lipo
gene1494	FE46_RS07380	NZ_CP007627.1	1706168..1707889	1722	0.475362	0.571157	0.5964	N/A
gene980	FE46_RS04850	NZ_CP007627.1	1123789..1124118	330	0.496105	0.596081	0.596081	N/A
gene42	FE46_RS00215	NZ_CP007627.1	complement(62397..63323)	927	0.706428	0.848788	0.592786	hydroxymethylbilane synthase
gene1349	FE46_RS06670	NZ_CP007627.1	1535604..1536602	999	0.491636	0.59071	0.59071	N/A
gene1317	FE46_RS06510	NZ_CP007627.1	complement(1499050..1499805)	756	0.649661	0.780582	0.586858	imidazole glycerol phosphate synthase subunit
gene2090	FE46_RS10345	NZ_CP007627.1	complement(2353643..2354557)	915	0.536769	0.64494	0.586858	DUF2279 domain-containing
gene1923	FE46_RS09515	NZ_CP007627.1	2152434..2154869	2436	0.403238	0.484499	0.586858	N/A
gene2465	FE46_RS12205	NZ_CP007627.1	2756636..2758261	1626	20.1371	24.1952	0.585686	phosphoenolpyruvate carboxykinase (ATP)
gene1454	FE46_RS07180	NZ_CP007627.1	complement(1650132..1651460)	1329	0.615932	0.740055	0.5822	aldehyde dehydrogenase
gene1271	FE46_RS06285	NZ_CP007627.1	complement(1449302..1449640)	339	0.482934	0.580255	0.580255	N/A
gene843	FE46_RS04180	NZ_CP007627.1	complement(977551..978690)	1140	20.3925	24.502	0.580157	acyl- dehydrogenase
gene47	FE46_RS00240	NZ_CP007627.1	67328..68803	1476	0.99826	1.19943	0.579136	Two-component system sensor histidine kinase
gene309	FE46_RS01520	NZ_CP007627.1	complement(359626..361944)	2319	0.917762	1.10271	0.577966	T9SS type A sorting domain-containing protein
gene2205	FE46_RS10920	NZ_CP007627.1	complement(2468611..2469162)	552	33.514	40.2678	0.577455	50S ribosomal L5
gene2055	FE46_RS10170	NZ_CP007627.1	complement(2321294..2321662)	369	178.356	214.298	0.576194	50S ribosomal L7 L12
gene2573	FE46_RS12740	NZ_CP007627.1	complement(2879052..2879603)	552	0.593169	0.712705	0.575351	dTDP-4-dehydrorhamnose 3,5-epimerase
gene2328	FE46_RS11535	NZ_CP007627.1	complement(2610758..2611504)	747	0.876651	1.05332	0.575351	1-acyl-sn-glycerol-3-phosphate acyltransferase
gene358	FE46_RS01770	NZ_CP007627.1	complement(424100..424720)	621	0.527261	0.633516	0.575351	bifunctional nuclease family
gene215	FE46_RS01065	NZ_CP007627.1	complement(256354..256833)	480	0.682144	0.819611	0.575351	ribonuclease HI
gene2245	FE46_RS11120	NZ_CP007627.1	2505943..2506581	639	0.512409	0.61567	0.575351	hypothetical protein
gene598	FE46_RS13160	NZ_CP007627.1	complement(699637..700533)	897	2.19016	2.63153	0.575351	type II restriction endonuclease
gene1938	FE46_RS09590	NZ_CP007627.1	complement(2173669..2174046)	378	0.866215	1.04078	0.575351	hypothetical protein
gene1027	FE46_RS05085	NZ_CP007627.1	1181160..1181759	600	2.18286	2.62275	0.575351	DUF1684 domain-containing
gene907	FE46_RS04490	NZ_CP007627.1	1054404..1055501	1098	1.78923	2.1498	0.575351	glycosyltransferase
gene1703	FE46_RS08425	NZ_CP007627.1	1933316..1934092	777	3.16051	3.79742	0.573103	class I SAM-dependent methyltransferase
gene1067	FE46_RS05285	NZ_CP007627.1	complement(1226816..1227883)	1068	1.07304	1.28928	0.570556	3-dehydroquinate synthase
gene11	FE46_RS00060	NZ_CP007627.1	17694..18131	438	128.206	154.042	0.570168	Gliding motility protein RemF
gene1583	FE46_RS07825	NZ_CP007627.1	1800277..1801311	1035	0.474535	0.570164	0.570164	N/A
gene1660	FE46_RS08210	NZ_CP007627.1	1884326..1885018	693	0.472481	0.567696	0.567696	N/A
gene1881	FE46_RS09305	NZ_CP007627.1	2112013..2112852	840	6.43165	7.72776	0.566266	phytoene squalene synthase family
gene1455	FE46_RS07185	NZ_CP007627.1	complement(1651487..1652182)	696	0.470444	0.565249	0.565249	N/A
gene1769	FE46_RS08750	NZ_CP007627.1	2000751..2001161	411	2.78833	3.35023	0.561203	hypothetical protein
gene2332	FE46_RS11550	NZ_CP007627.1	complement(2614604..2616070)	1467	2.56676	3.08402	0.559607	RNA polymerase factor sigma-54
gene1469	FE46_RS07255	NZ_CP007627.1	1670245..1671282	1038	2.2081	2.65308	0.55664	peptide chain release factor 2
gene1582	FE46_RS07820	NZ_CP007627.1	1799567..1800277	711	0.460519	0.553324	0.553324	N/A
gene465	FE46_RS02295	NZ_CP007627.1	547200..547910	711	0.460519	0.553324	0.553324	N/A
gene2589	FE46_RS12820	NZ_CP007627.1	2894080..2896167	2088	12.8588	15.4501	0.55313	glutamine--tRNA ligase domain fusion
gene1569	FE46_RS07755	NZ_CP007627.1	1786189..1787256	1068	0.459873	0.552547	0.552547	N/A
gene1448	FE46_RS07150	NZ_CP007627.1	1642029..1642577	549	11.9282	14.332	0.5449	translation initiation factor IF-3
gene1140	FE46_RS05650	NZ_CP007627.1	1299008..1299730	723	0.452876	0.54414	0.54414	N/A
gene168	FE46_RS00830	NZ_CP007627.1	199133..199918	786	0.624865	0.750788	0.543387	alpha/beta hydrolase
gene2452	FE46_RS12140	NZ_CP007627.1	2741114..2741845	732	0.670962	0.806175	0.543387	phosphatase PAP2 family
gene2159	FE46_RS10690	NZ_CP007627.1	complement(2425978..2427030)	1053	1.55475	1.86806	0.543387	ketoacyl-ACP synthase III
gene1408	FE46_RS06965	NZ_CP007627.1	1606476..1606670	195	0.839562	1.00875	0.543387	hypothetical protein
gene391	FE46_RS01935	NZ_CP007627.1	complement(462667..463713)	1047	0.625462	0.751506	0.543387	glycosyltransferase
gene1382	FE46_RS06835	NZ_CP007627.1	1574031..1574756	726	0.451005	0.541891	0.541891	N/A
gene2516	FE46_RS12460	NZ_CP007627.1	complement(2818485..2819600)	1116	68.3611	82.1373	0.538508	lipo
gene652	FE46_RS03230	NZ_CP007627.1	complement(776493..777830)	1338	8.93211	10.7321	0.537658	efflux RND transporter periplasmic adaptor subunit
gene1331	FE46_RS06580	NZ_CP007627.1	complement(1514239..1515129)	891	1.83743	2.20771	0.537416	exopolyphosphatase
gene864	FE46_RS04285	NZ_CP007627.1	1004275..1005753	1479	0.996235	1.197	0.53676	MBOAT family
gene275	FE46_RS01350	NZ_CP007627.1	complement(319484..320584)	1101	0.446089	0.535985	0.535985	N/A
gene667	FE46_RS03305	NZ_CP007627.1	791010..792008	999	8.3578	10.0421	0.534078	type IX secretion system membrane
gene559	FE46_RS02765	NZ_CP007627.1	complement(654636..656573)	1938	0.506857	0.608999	0.533507	ATP-dependent helicase
gene1737	FE46_RS08595	NZ_CP007627.1	1966288..1967358	1071	0.917169	1.102	0.533507	DNA-binding domain-containing
gene1539	FE46_RS07605	NZ_CP007627.1	complement(1755612..1756844)	1233	0.663887	0.797675	0.531574	Glycosyl group 1 family
gene2276	FE46_RS11275	NZ_CP007627.1	2543755..2545017	1263	1.16661	1.40171	0.530293	DUF1343 domain-containing
gene715	FE46_RS03545	NZ_CP007627.1	839904..841889	1986	3.70955	4.4571	0.530293	cell division
gene1145	FE46_RS05675	NZ_CP007627.1	complement(1303369..1304484)	1116	0.440093	0.528781	0.528781	N/A
gene1486	FE46_RS07340	NZ_CP007627.1	complement(1692883..1693920)	1038	0.630885	0.758022	0.528701	HAMP domain-containing histidine kinase
secA	secA	NZ_CP007627.1	1936069..1939419	3351	12.3116	14.7926	0.528021	N/A
gene2028	FE46_RS10035	NZ_CP007627.1	2278071..2278961	891	2.75614	3.31156	0.52775	rhomboid family intramembrane serine protease
gene477	FE46_RS02355	NZ_CP007627.1	complement(561908..562954)	1047	0.469096	0.563629	0.52398	ketol-acid reductoisomerase
gene2103	FE46_RS10410	NZ_CP007627.1	2367680..2368816	1137	0.431965	0.519015	0.52398	N/A
gene609	FE46_RS03010	NZ_CP007627.1	713076..713300	225	14.5524	17.485	0.523046	hypothetical protein
gene2460	FE46_RS12180	NZ_CP007627.1	complement(2750795..2752993)	2199	1.86124	2.23632	0.522487	N/A
gene1287	FE46_RS06360	NZ_CP007627.1	complement(1463977..1465107)	1131	0.434256	0.521768	0.521768	N/A
gene1077	FE46_RS05335	NZ_CP007627.1	1240543..1240977	435	55.3243	66.4733	0.520943	DUF1573 domain-containing
gene445	FE46_RS02195	NZ_CP007627.1	523798..524931	1134	0.433108	0.520388	0.520388	N/A
gene461	FE46_RS02275	NZ_CP007627.1	543790..544548	759	0.431396	0.518331	0.518331	N/A
gene1722	FE46_RS08520	NZ_CP007627.1	complement(1954251..1955123)	873	0.375062	0.450645	0.514787	N/A
gene1378	FE46_RS06815	NZ_CP007627.1	1568925..1571537	2613	0.501231	0.60224	0.514787	PAS domain S-box
gene199	FE46_RS00985	NZ_CP007627.1	238201..238950	750	9.60459	11.5401	0.514787	Uroporphyrinogen-III synthase
gene1154	FE46_RS05720	NZ_CP007627.1	complement(1315019..1315588)	570	0.574437	0.690199	0.514787	hypothetical protein
gene656	FE46_RS03250	NZ_CP007627.1	complement(781054..781596)	543	3.618	4.34711	0.514787	DUF420 domain-containing
gene542	FE46_RS02680	NZ_CP007627.1	634848..637541	2694	0.425391	0.511116	0.511116	N/A
gene584	FE46_RS02890	NZ_CP007627.1	complement(686140..686385)	246	4.65855	5.59734	0.510946	hypothetical protein
gene592	FE46_RS02930	NZ_CP007627.1	complement(692723..694504)	1782	1.56181	1.87655	0.51005	sporadically distributed TIGR04141 family
gene793	FE46_RS03925	NZ_CP007627.1	complement(914644..915222)	579	1.41377	1.69868	0.509425	chalcone isomerase
gene1371	FE46_RS06780	NZ_CP007627.1	1561977..1564082	2106	1.86569	2.24167	0.508102	ATP-dependent DNA helicase
gene483	FE46_RS02385	NZ_CP007627.1	569729..570931	1203	1.08871	1.30811	0.508102	IS256 family transposase
gene2543	FE46_RS12595	NZ_CP007627.1	complement(2846306..2847781)	1476	1.2201	1.46597	0.507503	polysaccharide biosynthesis
gene2358	FE46_RS11680	NZ_CP007627.1	complement(2644112..2645110)	999	0.491636	0.59071	0.505912	DUF4872 domain-containing
gene2078	FE46_RS10285	NZ_CP007627.1	2341524..2342183	660	0.744158	0.894121	0.505912	ribonuclease HII
gene2033	FE46_RS10060	NZ_CP007627.1	2283922..2284119	198	4.96105	5.96081	0.505912	cbb3-type cytochrome oxidase assembly
gene857	FE46_RS04250	NZ_CP007627.1	complement(996466..997125)	660	0.744158	0.894121	0.505912	family pyridoxal phosphate-dependent enzyme
gene2178	FE46_RS10785	NZ_CP007627.1	complement(2446913..2447701)	789	5.18741	6.23278	0.505215	sugar transporter
gene760	FE46_RS03765	NZ_CP007627.1	884393..885343	951	2.23795	2.68894	0.504573	methionyl-tRNA formyltransferase
gene26	FE46_RS00135	NZ_CP007627.1	46784..49819	3036	0.593169	0.712705	0.50276	N-6 DNA methylase
gene1372	FE46_RS06785	NZ_CP007627.1	complement(1564141..1564986)	846	43.9282	52.7806	0.502553	DUF2911 domain-containing
gene2151	FE46_RS10650	NZ_CP007627.1	2416078..2416776	699	0.936851	1.12565	0.501588	family
gene677	FE46_RS03355	NZ_CP007627.1	801493..802221	729	8.98297	10.7932	0.499029	pyridoxine 5 -phosphate synthase
gene904	FE46_RS04475	NZ_CP007627.1	1049807..1050595	789	0.414993	0.498623	0.498623	N/A
gene1339	FE46_RS06620	NZ_CP007627.1	complement(1522982..1524370)	1389	1.88584	2.26588	0.498393	bifunctional UDP-3-O-[3-hydroxymyristoyl] N-acetylglucosamine deacetylase 3-hydroxyacyl-ACP dehydratase
gene1210	FE46_RS06000	NZ_CP007627.1	1375065..1375460	396	0.413421	0.496734	0.496734	N/A
gene448	FE46_RS02210	NZ_CP007627.1	complement(527803..529056)	1254	0.913878	1.09804	0.496136	DUF5103 domain-containing
gene558	FE46_RS02760	NZ_CP007627.1	complement(653444..654643)	1200	0.409287	0.491766	0.491766	N/A
gene2581	FE46_RS12780	NZ_CP007627.1	complement(2887285..2888184)	900	1.09143	1.31138	0.489048	cation transporter
gene692	FE46_RS03430	NZ_CP007627.1	814466..815143	678	0.482934	0.580255	0.489048	hypothetical protein
gene1127	FE46_RS05585	NZ_CP007627.1	1286660..1286965	306	8.02523	9.64248	0.485809	2TM domain-containing
gene1893	FE46_RS09365	NZ_CP007627.1	complement(2122943..2123347)	405	0.404234	0.485695	0.485695	N/A
gene495	FE46_RS02445	NZ_CP007627.1	complement(581580..583154)	1575	6.65253	7.99316	0.485257	S41 family peptidase
gene738	FE46_RS03655	NZ_CP007627.1	861095..861385	291	28.1297	33.7984	0.483249	hypothetical protein
gene971	FE46_RS04805	NZ_CP007627.1	1113894..1115153	1260	24.6871	29.6621	0.479459	aminotransferase class I II-fold pyridoxal phosphate-dependent enzyme
gene660	FE46_RS03270	NZ_CP007627.1	complement(783609..784616)	1008	25.3368	30.4427	0.478917	cytochrome oxidase subunit III
gene1031	FE46_RS05105	NZ_CP007627.1	complement(1184319..1184507)	189	3.46486	4.1631	0.47712	Hypothetical protein FPSM_01062
gene820	FE46_RS04060	NZ_CP007627.1	948129..949883	1755	0.746278	0.896668	0.47712	ABC transporter ATP-binding
gene305	FE46_RS01495	NZ_CP007627.1	complement(354295..355188)	894	4.02877	4.84065	0.476065	IS982 family transposase
gene795	FE46_RS03935	NZ_CP007627.1	916599..919115	2517	1.23583	1.48487	0.474077	type I DNA topoisomerase
gene1884	FE46_RS09320	NZ_CP007627.1	complement(2114214..2114741)	528	41.8589	50.2943	0.472257	DUF4252 domain-containing
gene2155	FE46_RS10670	NZ_CP007627.1	complement(2421213..2423180)	1968	2.66203	3.19848	0.469956	polysaccharide biosynthesis
gene562	FE46_RS02780	NZ_CP007627.1	complement(660781..662874)	2094	0.390914	0.469691	0.469691	N/A
gene1685	FE46_RS08335	NZ_CP007627.1	complement(1913495..1915426)	1932	18.5577	22.2975	0.469126	ATP-dependent metallopeptidase Yme1 Tma family
gene1274	FE46_RS06300	NZ_CP007627.1	complement(1452316..1454175)	1860	2.64056	3.17269	0.468736	peptidase M61
gene1503	FE46_RS07425	NZ_CP007627.1	complement(1713892..1715394)	1503	2.72313	3.2719	0.468437	histidine ammonia-lyase
gene1230	FE46_RS06100	NZ_CP007627.1	1398056..1398895	840	0.389797	0.468349	0.468349	N/A
gene1189	FE46_RS05895	NZ_CP007627.1	1356706..1357296	591	10.2495	12.315	0.467565	family transcriptional regulator
gene1844	FE46_RS09120	NZ_CP007627.1	complement(2080861..2082282)	1422	17.2695	20.7496	0.467243	MBOAT family
gene622	FE46_RS03080	NZ_CP007627.1	complement(733402..734637)	1236	3.97366	4.77443	0.46576	tetracycline resistance MFS efflux pump
gene2529	FE46_RS12525	NZ_CP007627.1	complement(2832500..2833600)	1101	0.594785	0.714647	0.46576	DNA-protecting
gene2229	FE46_RS11040	NZ_CP007627.1	complement(2489315..2490001)	687	0.953215	1.14531	0.46576	noncanonical pyrimidine family
gene1556	FE46_RS07690	NZ_CP007627.1	1769516..1769896	381	0.859394	1.03258	0.46576	PH domain-containing
gene781	FE46_RS03870	NZ_CP007627.1	complement(901803..904655)	2853	6.65647	7.99788	0.465378	carbamoyl-phosphate synthase large subunit
gene2404	FE46_RS11910	NZ_CP007627.1	2697702..2698124	423	0.387032	0.465027	0.465027	N/A
gene1222	FE46_RS06060	NZ_CP007627.1	1393531..1393953	423	0.387032	0.465027	0.465027	N/A
gene2262	FE46_RS11205	NZ_CP007627.1	complement(2523058..2524686)	1629	7.13551	8.57346	0.464203	Pyruvate dehydrogenase E2 component (dihydrolipoamide acetyltransferase)
gene1017	FE46_RS05035	NZ_CP007627.1	complement(1171480..1172328)	849	0.385665	0.463384	0.463384	N/A
gene1647	FE46_RS08145	NZ_CP007627.1	1874117..1874542	426	0.384307	0.461753	0.461753	N/A
gene330	FE46_RS01630	NZ_CP007627.1	387386..388978	1593	0.513856	0.617409	0.461366	alpha-amylase
gene1820	FE46_RS09010	NZ_CP007627.1	complement(2053949..2055745)	1797	20.043	24.0821	0.461366	translational GTPase
gene14	FE46_RS12855	NZ_CP007627.1	21026..23590	2565	4.65933	5.59828	0.460652	type IX secretion system membrane protein PorP/SprF
gene657	FE46_RS03255	NZ_CP007627.1	complement(781683..782366)	684	5.02633	6.03924	0.460539	SCO family
gene2513	FE46_RS12445	NZ_CP007627.1	complement(2816376..2817185)	810	1.61693	1.94278	0.460281	DNA RNA non-specific endonuclease
gene1795	FE46_RS08880	NZ_CP007627.1	2031623..2032672	1050	1.71511	2.06074	0.459789	o-succinylbenzoate synthase
gene2255	FE46_RS11170	NZ_CP007627.1	2516693..2517541	849	1.73549	2.08523	0.458483	glycosyltransferase family 2
gene1814	FE46_RS08980	NZ_CP007627.1	complement(2046881..2048089)	1209	0.40624	0.488106	0.458483	penicillin-binding
gene2423	FE46_RS12005	NZ_CP007627.1	complement(2716421..2716879)	459	6.42018	7.71398	0.458483	Thioredoxin family
gene441	FE46_RS02180	NZ_CP007627.1	complement(521238..521615)	378	1.29932	1.56116	0.458483	helix-turn-helix transcriptional regulator
gene1322	FE46_RS06535	NZ_CP007627.1	complement(1503542..1504831)	1290	0.380732	0.457457	0.457457	N/A
gene637	FE46_RS03155	NZ_CP007627.1	complement(752197..752904)	708	0.924942	1.11134	0.454928	dipeptidase
gene1879	FE46_RS09295	NZ_CP007627.1	2109600..2110499	900	0.727621	0.874251	0.454928	family transcriptional regulator
gene112	FE46_RS00565	NZ_CP007627.1	complement(141005..141355)	351	5.59708	6.72501	0.454928	aspartate 1-decarboxylase
gene897	FE46_RS04440	NZ_CP007627.1	1042200..1042877	678	10.1416	12.1854	0.454425	tRNA (guanosine(37)-N1)-methyltransferase
gene1498	FE46_RS07400	NZ_CP007627.1	complement(1710109..1711266)	1158	0.706885	0.849338	0.452822	peptidase M14
gene684	FE46_RS03390	NZ_CP007627.1	807533..808765	1233	3.18666	3.82884	0.449699	ATP-dependent Clp protease ATP-binding subunit
gene1625	FE46_RS08035	NZ_CP007627.1	1850453..1851514	1062	1.38741	1.667	0.449126	isochorismate synthase
gene2310	FE46_RS11440	NZ_CP007627.1	complement(2580768..2582135)	1368	2.51316	3.01962	0.448472	NADH-quinone oxidoreductase subunit
gene1545	FE46_RS07635	NZ_CP007627.1	1760359..1760985	627	5.74437	6.90199	0.448294	Restriction endonuclease
gene2444	FE46_RS12100	NZ_CP007627.1	complement(2735517..2736071)	555	3.24479	3.89869	0.448294	DNA-3-methyladenine glycosylase I
gene73	FE46_RS00370	NZ_CP007627.1	complement(94190..95461)	1272	6.0492	7.26825	0.448056	serine--tRNA ligase
gene1730	FE46_RS08560	NZ_CP007627.1	1960975..1962609	1635	1.70223	2.04527	0.446979	ABC-F family ATP-binding cassette domain-containing
gene1183	FE46_RS05865	NZ_CP007627.1	1349219..1351681	2463	1.19645	1.43756	0.446846	DNA translocase
gene964	FE46_RS04770	NZ_CP007627.1	1104696..1106009	1314	0.747555	0.898204	0.444589	family
gene1800	FE46_RS08905	NZ_CP007627.1	2036111..2036752	642	0.765022	0.91919	0.444589	Hypothetical transmembrane
gene541	FE46_RS02675	NZ_CP007627.1	633692..634690	999	0.491636	0.59071	0.444589	virulence family
gene36	FE46_RS00185	NZ_CP007627.1	complement(57785..58687)	903	0.725203	0.871347	0.444589	oxygen-dependent coproporphyrinogen oxidase
gene650	FE46_RS03220	NZ_CP007627.1	773294..774037	744	0.880186	1.05756	0.444589	deoxyribose-phosphate aldolase
gene878	FE46_RS04355	NZ_CP007627.1	1022487..1023053	567	6.64098	7.97928	0.442839	gliding motility-associated peptidyl-prolyl isomerase
gene1697	FE46_RS08395	NZ_CP007627.1	complement(1927248..1928549)	1302	5.90982	7.10078	0.442024	diapophytoene dehydrogenase
gene2287	FE46_RS11330	NZ_CP007627.1	complement(2556435..2557343)	909	4.5026	5.40997	0.439791	phosphate ABC transporter substrate-binding
gene94	FE46_RS00475	NZ_CP007627.1	122203..122577	375	3.49258	4.19641	0.439594	four helix bundle protein
gene2505	FE46_RS12405	NZ_CP007627.1	2806358..2807599	1242	2.50449	3.0092	0.438298	GTPase
gene125	FE46_RS12870	NZ_CP007627.1	156115..157089	975	171.439	205.987	0.437998	T9SS type A sorting domain-containing protein
gene1463	FE46_RS07225	NZ_CP007627.1	complement(1660689..1665031)	4343	2.14868	2.58169	0.436924	family heavy metal efflux RND transporter
gene289	FE46_RS01420	NZ_CP007627.1	complement(334868..336118)	1251	12.4324	14.9377	0.435015	methionine adenosyltransferase
gene1591	FE46_RS07865	NZ_CP007627.1	complement(1809495..1810322)	828	6.72258	8.07732	0.429655	DUF4249 domain-containing
gene2307	FE46_RS11425	NZ_CP007627.1	complement(2577665..2578696)	1032	1.90366	2.28729	0.428363	NADH-quinone oxidoreductase subunit
gene1014	FE46_RS05020	NZ_CP007627.1	1167262..1168875	1614	3.34733	4.02188	0.428079	alkaline phosphatase family
gene1688	FE46_RS08350	NZ_CP007627.1	complement(1916693..1917658)	966	6.77907	8.1452	0.427116	prolipo diacylglyceryl transferase
gene1738	FE46_RS08600	NZ_CP007627.1	1967358..1967897	540	0.606351	0.728543	0.425259	Uncharacterised family (UPF0227)
gene501	FE46_RS02475	NZ_CP007627.1	586539..587780	1242	7.11803	8.55246	0.423894	transcription termination antitermination
gene954	FE46_RS04720	NZ_CP007627.1	1095504..1096976	1473	19.2279	23.1027	0.423238	IMP dehydrogenase
gene746	FE46_RS03695	NZ_CP007627.1	867373..868230	858	1.33567	1.60483	0.422634	peptide chain release factor N(5)-glutamine methyltransferase
gene1767	FE46_RS08740	NZ_CP007627.1	complement(1998957..1999406)	450	2.18286	2.62275	0.419184	Transcription elongation family
gene701	FE46_RS03475	NZ_CP007627.1	complement(824378..824995)	618	1.05964	1.27318	0.416211	family ribosome biogenesis GTP-binding
gene210	FE46_RS01040	NZ_CP007627.1	251532..251957	426	26.9015	32.3227	0.415958	50S ribosomal protein L27
gene1902	FE46_RS09410	NZ_CP007627.1	2130765..2132954	2190	0.6728	0.808383	0.41523	response regulator
gene665	FE46_RS03295	NZ_CP007627.1	complement(787407..789467)	2061	0.397173	0.477212	0.414448	thioredoxin domain-containing
gene1617	FE46_RS07995	NZ_CP007627.1	1843951..1844604	654	2.50328	3.00775	0.414448	DEAD DEAH box helicase
gene2157	FE46_RS10680	NZ_CP007627.1	complement(2424587..2425237)	651	1.25741	1.5108	0.414448	Acetyltransferase
gene1931	FE46_RS09555	NZ_CP007627.1	2160666..2161004	339	9.17575	11.0249	0.412974	hypothetical protein
gene1480	FE46_RS07310	NZ_CP007627.1	complement(1686679..1687320)	642	3.31509	3.98316	0.412833	rhomboid family intramembrane serine protease
gene2311	FE46_RS11445	NZ_CP007627.1	complement(2582137..2582667)	531	2.46651	2.96356	0.41183	NAD(P)H-dependent oxidoreductase subunit E
gene1389	FE46_RS06870	NZ_CP007627.1	1584522..1586414	1893	3.54585	4.26042	0.411724	U32 family peptidase
gene829	FE46_RS04110	NZ_CP007627.1	complement(959696..960673)	978	1.50658	1.81018	0.411349	M23 family metallopeptidase
gene818	FE46_RS04050	NZ_CP007627.1	complement(946184..947134)	951	1.7215	2.06842	0.410965	GSCFA domain-containing
gene377	FE46_RS01865	NZ_CP007627.1	complement(447276..447632)	357	0.458584	0.550999	0.40754	arsenate reductase
gene260	FE46_RS01290	NZ_CP007627.1	complement(304588..304914)	327	0.500656	0.601549	0.40754	nucleotide pyrophosphohydrolase
gene1119	FE46_RS05545	NZ_CP007627.1	complement(1279311..1279622)	312	1.04945	1.26094	0.40754	four helix bundle
gene1517	FE46_RS07495	NZ_CP007627.1	complement(1726635..1727702)	1068	2.75924	3.31528	0.40754	chorismate synthase
gene96	FE46_RS00485	NZ_CP007627.1	123718..124797	1080	0.454763	0.546407	0.40754	DNA polymerase IV
gene922	FE46_RS04565	NZ_CP007627.1	1067150..1067593	444	25.8109	31.0123	0.405609	50S ribosomal L9
gene943	FE46_RS04665	NZ_CP007627.1	1086581..1087165	585	4.75752	5.71626	0.405552	dephospho- kinase
gene1483	FE46_RS07325	NZ_CP007627.1	complement(1690163..1691047)	885	2.40485	2.88948	0.402381	hypothetical protein, partial
gene741	FE46_RS03670	NZ_CP007627.1	863795..864487	693	12.757	15.3278	0.399525	alkaline phosphatase
gene270	FE46_RS01325	NZ_CP007627.1	complement(313643..314854)	1212	0.67539	0.811496	0.394394	aminotransferase class I/II-fold pyridoxal phosphate-dependent enzyme
gene1880	FE46_RS09300	NZ_CP007627.1	2110548..2112011	1464	4.24942	5.10577	0.393725	phytoene desaturase
gene2457	FE46_RS12165	NZ_CP007627.1	2746983..2747372	390	1.67912	2.0175	0.391238	HIT family
gene2552	FE46_RS12635	NZ_CP007627.1	complement(2859196..2859729)	534	21.7673	26.1539	0.389265	ATP synthase F1 subunit delta
gene882	FE46_RS04375	NZ_CP007627.1	complement(1025915..1028155)	2241	5.77129	6.93432	0.389072	M1 family metallopeptidase
gene2233	FE46_RS11060	NZ_CP007627.1	complement(2493074..2495224)	2151	1.44611	1.73753	0.388783	peptidase S46
gene1126	FE46_RS05580	NZ_CP007627.1	1286331..1286657	327	2.50328	3.00775	0.388133	2TM domain-containing
gene777	FE46_RS03850	NZ_CP007627.1	898507..899853	1347	0.607701	0.730165	0.388133	DNA recombination
gene43	FE46_RS00220	NZ_CP007627.1	complement(63392..64633)	1242	2.50449	3.0092	0.387163	Glutamyl-tRNA reductase
gene1616	FE46_RS07990	NZ_CP007627.1	1842710..1843873	1164	1.26583	1.52093	0.386091	sigma-54-dependent Fis family transcriptional regulator
gene2285	FE46_RS11320	NZ_CP007627.1	2552029..2554269	2241	1.82636	2.19441	0.385685	membrane associated
gene658	FE46_RS03260	NZ_CP007627.1	complement(782477..783151)	675	3.39556	4.07984	0.384645	hypothetical protein
gene262	FE46_RS13120	NZ_CP007627.1	complement(305469..305984)	516	1.26911	1.52486	0.383567	hypothetical protein
gene564	FE46_RS02790	NZ_CP007627.1	complement(663409..664317)	909	1.62094	1.94759	0.379434	hypothetical protein
gene936	FE46_RS04630	NZ_CP007627.1	complement(1079271..1079789)	519	5.99341	7.2012	0.37772	hypothetical protein
gene1283	FE46_RS06340	NZ_CP007627.1	complement(1458626..1459639)	1014	0.484363	0.581972	0.376191	cytochrome c
gene428	FE46_RS02115	NZ_CP007627.1	506973..507584	612	1.60505	1.9285	0.376191	N-acetylmuramoyl-L-alanine amidase
gene1656	FE46_RS08190	NZ_CP007627.1	1880757..1881902	1146	0.428572	0.514939	0.376191	site-specific integrase
gene1280	FE46_RS06325	NZ_CP007627.1	complement(1457068..1457952)	885	1.10993	1.3336	0.376191	helix-turn-helix domain-containing
gene2222	FE46_RS11005	NZ_CP007627.1	2478590..2480239	1650	0.396884	0.476864	0.376191	outer membrane
gene473	FE46_RS02335	NZ_CP007627.1	558264..558638	375	4.8023	5.77006	0.373578	hypothetical protein
gene2511	FE46_RS12435	NZ_CP007627.1	2813031..2814971	1941	0.590419	0.7094	0.372102	penicillin-binding 2
gene2150	FE46_RS10645	NZ_CP007627.1	2415485..2416081	597	1.9196	2.30644	0.372102	Hypothetical lipo precursor
gene700	FE46_RS03470	NZ_CP007627.1	823936..824259	324	7.07409	8.49967	0.372102	gliding motility
gene1916	FE46_RS09480	NZ_CP007627.1	complement(2146108..2147070)	963	0.850024	1.02132	0.370491	FAD: FMN transferase
gene2279	FE46_RS11290	NZ_CP007627.1	complement(2546707..2547099)	393	10.4144	12.5131	0.369372	transporter
gene1184	FE46_RS05870	NZ_CP007627.1	1351686..1352327	642	1.02003	1.22559	0.369093	outer membrane lipo carrier
gene2294	FE46_RS11365	NZ_CP007627.1	complement(2562526..2563869)	1344	1.33993	1.60995	0.368461	Kynurenine 3-monooxygenase
gene154	FE46_RS00760	NZ_CP007627.1	complement(184873..185484)	612	28.0883	33.7487	0.367837	50S ribosomal protein L25/general stress protein Ctc
gene850	FE46_RS04215	NZ_CP007627.1	986941..988014	1074	17.6824	21.2458	0.367182	peptide chain release factor 1
gene956	FE46_RS04730	NZ_CP007627.1	1097783..1099717	1935	34.6889	41.6794	0.365294	DEAD DEAH box helicase
gene492	FE46_RS02430	NZ_CP007627.1	580106..580684	579	3.95856	4.75629	0.364185	family
gene1413	FE46_RS06985	NZ_CP007627.1	1610508..1611560	1053	2.17664	2.61528	0.364185	glutamine cyclotransferase
gene2001	FE46_RS09905	NZ_CP007627.1	2247282..2247731	450	0.727621	0.874251	0.362258	glycine zipper family
gene1502	FE46_RS07420	NZ_CP007627.1	complement(1713416..1713892)	477	0.686435	0.824766	0.362258	N/A
gene1467	FE46_RS07245	NZ_CP007627.1	1668508..1668828	321	3.06009	3.67676	0.362258	family nucleoid-associated
gene1484	FE46_RS07330	NZ_CP007627.1	complement(1691077..1692354)	1278	4.73978	5.69495	0.361173	DNA (cytosine-5-)-methyltransferase
gene1507	FE46_RS07445	NZ_CP007627.1	1718746..1719456	711	5.06571	6.08656	0.361042	family DNA-binding transcriptional regulator
gene2025	FE46_RS10020	NZ_CP007627.1	2273724..2275286	1563	4.92296	5.91504	0.359707	ribonuclease Y
gene1704	FE46_RS08430	NZ_CP007627.1	1934258..1934944	687	3.57456	4.2949	0.359594	ABC transporter ATP-binding
gene223	FE46_RS01105	NZ_CP007627.1	complement(262349..263059)	711	0.690779	0.829986	0.35784	PH domain-containing protein
gene2540	FE46_RS12580	NZ_CP007627.1	complement(2843914..2844546)	633	0.775899	0.932259	0.35784	Hypothetical transmembrane
gene629	FE46_RS03115	NZ_CP007627.1	complement(743009..743794)	786	4.99892	6.00631	0.355671	hypothetical protein
gene847	FE46_RS04200	NZ_CP007627.1	982090..982971	882	4.2692	5.12954	0.35483	energy transducer
gene1348	FE46_RS06665	NZ_CP007627.1	1534985..1535593	609	1.34413	1.615	0.354383	16S rRNA (guanine(966)-N(2))-methyltransferase
gene1990	FE46_RS09850	NZ_CP007627.1	complement(2231644..2232486)	843	0.971024	1.16671	0.354383	asparaginase
gene596	FE46_RS02945	NZ_CP007627.1	complement(696884..697609)	726	3.38253	4.06419	0.352679	membrane spanning
gene72	FE46_RS00365	NZ_CP007627.1	complement(92177..93955)	1779	0.73621	0.884571	0.352467	tetratricopeptide repeat protein
gene1759	FE46_RS08700	NZ_CP007627.1	complement(1986344..1987447)	1104	6.82144	8.19611	0.351503	N/A
gene1390	FE46_RS06875	NZ_CP007627.1	complement(1586494..1588470)	1977	3.72643	4.47739	0.350991	dehydrogenase
gene1859	FE46_RS09195	NZ_CP007627.1	2096784..2097281	498	9.86233	11.8498	0.350991	alkyl hydroperoxide reductase
gene935	FE46_RS04625	NZ_CP007627.1	complement(1078385..1079266)	882	11.8795	14.2735	0.350494	4-hydroxy-tetrahydrodipicolinate synthase
gene737	FE46_RS03650	NZ_CP007627.1	860663..861004	342	69.8899	83.9742	0.350005	metal transporter
gene2548	FE46_RS12615	NZ_CP007627.1	complement(2852819..2853805)	987	0.497613	0.597892	0.34932	ATP-grasp domain-containing
gene1100	FE46_RS05450	NZ_CP007627.1	1260107..1261759	1653	0.891368	1.071	0.34932	2-succinyl-5-enolpyruvyl-6-hydroxy-3-cyclohexene-1-carboxylate synthase
gene1165	FE46_RS05775	NZ_CP007627.1	1329636..1330247	612	0.802523	0.964248	0.34932	hypothetical protein
gene2165	FE46_RS10720	NZ_CP007627.1	complement(2431232..2432350)	1119	1.46304	1.75788	0.34932	epimerase
gene1593	FE46_RS07875	NZ_CP007627.1	complement(1813090..1814031)	942	0.695179	0.835272	0.34932	type IX secretion system membrane
gene1147	FE46_RS05685	NZ_CP007627.1	complement(1305720..1306679)	960	0.682144	0.819611	0.34932	Exostosin family
gene2084	FE46_RS10315	NZ_CP007627.1	complement(2348263..2349165)	903	6.70813	8.05996	0.34598	1-aminocyclopropane-1-carboxylate deaminase
gene1971	FE46_RS09755	NZ_CP007627.1	2209165..2210844	1680	1.26684	1.52213	0.345523	gliding motility-associated ABC transporter substrate-binding
gene1493	FE46_RS07375	NZ_CP007627.1	1703685..1706156	2472	0.794731	0.954886	0.34521	AAA domain-containing
gene2442	FE46_RS12090	NZ_CP007627.1	2734068..2734703	636	1.28706	1.54644	0.3444	leucyl phenylalanyl-tRNA-- transferase
gene1264	FE46_RS06255	NZ_CP007627.1	complement(1443281..1444588)	1308	0.625821	0.751936	0.3444	M48 family metalloprotease
gene375	FE46_RS01855	NZ_CP007627.1	complement(445247..446107)	861	0.570434	0.685389	0.341196	family
gene1754	FE46_RS08675	NZ_CP007627.1	complement(1982214..1983008)	795	0.617791	0.742289	0.341196	ABC transporter substrate-binding
gene384	FE46_RS01900	NZ_CP007627.1	455415..456479	1065	1.3835	1.66231	0.341196	two-component sensor histidine kinase
gene2194	FE46_RS10865	NZ_CP007627.1	complement(2463617..2463991)	375	21.8286	26.2275	0.340563	30S ribosomal S13
gene2122	FE46_RS10505	NZ_CP007627.1	complement(2385457..2386851)	1395	0.586791	0.705042	0.339617	sugar transferase
gene426	FE46_RS02105	NZ_CP007627.1	503231..505828	2598	9.83044	11.8115	0.339073	family
gene1526	FE46_RS07540	NZ_CP007627.1	complement(1737304..1738095)	792	0.413421	0.496734	0.337275	(Fe-S)-binding
gene319	FE46_RS01570	NZ_CP007627.1	complement(371941..373098)	1158	1.69652	2.03841	0.337275	ABC transporter permease
gene1075	FE46_RS05325	NZ_CP007627.1	1236534..1237421	888	11.7993	14.1771	0.336188	hypothetical protein
gene2308	FE46_RS11430	NZ_CP007627.1	complement(2578689..2579744)	1056	2.48053	2.9804	0.335827	2Fe-2S iron-sulfur cluster binding domain-containing
gene13	FE46_RS00070	NZ_CP007627.1	19591..21024	1434	21.235	25.5142	0.335781	putative adhesin SprC
gene1055	FE46_RS05225	NZ_CP007627.1	complement(1213095..1213481)	387	5.49946	6.60771	0.334612	peptide-methionine (R)-S-oxide reductase
gene2594	FE46_RS12845	NZ_CP007627.1	complement(2898584..2900089)	1506	5.10929	6.13892	0.334574	glutamate--tRNA ligase
gene2410	FE46_RS11940	NZ_CP007627.1	2700240..2700443	204	6.42018	7.71398	0.334392	hypothetical protein
gene2306	FE46_RS11420	NZ_CP007627.1	complement(2577105..2577656)	552	0.889754	1.06906	0.333442	NADH-quinone oxidoreductase subunit I
gene2322	FE46_RS11500	NZ_CP007627.1	2600136..2601527	1392	7.17428	8.62004	0.332946	Probable lipo precursor
gene1481	FE46_RS07315	NZ_CP007627.1	1687491..1688372	882	3.89797	4.68349	0.331291	lipid A biosynthesis acyltransferase
gene2039	FE46_RS10090	NZ_CP007627.1	2289980..2290429	450	1.81905	2.18563	0.330438	family
gene604	FE46_RS02985	NZ_CP007627.1	705612..705836	225	8.73145	10.491	0.329695	hypothetical protein
gene1542	FE46_RS07620	NZ_CP007627.1	complement(1757875..1758342)	468	5.9469	7.14532	0.327316	hypothetical protein
gene2180	FE46_RS10795	NZ_CP007627.1	2448508..2450004	1497	0.546809	0.657003	0.326032	sodium:solute symporter
gene1894	FE46_RS09370	NZ_CP007627.1	2123513..2124655	1143	0.859394	1.03258	0.326032	ABC transporter substrate-binding
gene1202	FE46_RS05960	NZ_CP007627.1	complement(1366848..1367102)	255	0.642018	0.771398	0.326032	hypothetical protein
gene790	FE46_RS13185	NZ_CP007627.1	complement(911958..912298)	341	0.960203	1.1537	0.326032	xxY
gene991	FE46_RS04905	NZ_CP007627.1	1134203..1134550	348	5.17489	6.21774	0.326032	hypothetical protein
gene1262	FE46_RS13215	NZ_CP007627.1	complement(1441015..1441301)	287	3.99304	4.79772	0.326032	transposase family
gene1451	FE46_RS07165	NZ_CP007627.1	1643926..1646844	2919	7.51551	9.03004	0.324097	peptidase M16
gene1071	FE46_RS05305	NZ_CP007627.1	complement(1231188..1233095)	1908	0.686435	0.824766	0.323338	DUF2207 domain-containing
gene2021	FE46_RS10005	NZ_CP007627.1	complement(2271042..2272733)	1692	1.45137	1.74385	0.32316	M23 family metallopeptidase
gene1565	FE46_RS07735	NZ_CP007627.1	complement(1782166..1783917)	1752	3.08367	3.70509	0.322772	transcription termination factor Rho
gene111	FE46_RS00560	NZ_CP007627.1	complement(140041..141000)	960	4.2634	5.12257	0.322591	flippase-like domain-containing protein
gene1276	FE46_RS06305	NZ_CP007627.1	complement(1454583..1455164)	582	1.40648	1.68992	0.321742	Yip1 domain-containing [Flavobacterium psychrophilum DSM 3660]
gene2284	FE46_RS11315	NZ_CP007627.1	2551073..2551957	885	0.924942	1.11134	0.321742	IS982 family transposase
gene119	FE46_RS00600	NZ_CP007627.1	151563..153074	1512	27.0692	32.5242	0.319222	F0F1 ATP synthase subunit beta
gene1538	FE46_RS07600	NZ_CP007627.1	complement(1754509..1755363)	855	5.16994	6.21179	0.317411	metalloprotease
gene1718	FE46_RS08500	NZ_CP007627.1	complement(1948135..1949043)	909	14.4083	17.3119	0.316025	prohibitin family
gene488	FE46_RS02410	NZ_CP007627.1	complement(574074..574529)	456	23.3365	28.0393	0.315672	50S ribosomal L13
gene2488	FE46_RS12320	NZ_CP007627.1	2779191..2781062	1872	1.57418	1.89141	0.314388	M1 family metallopeptidase
gene1421	FE46_RS07025	NZ_CP007627.1	1616138..1617760	1623	0.504358	0.605997	0.313492	adenine deaminase
gene1748	FE46_RS08645	NZ_CP007627.1	1977221..1978177	957	10.0932	12.1272	0.312271	family
gene607	FE46_RS03000	NZ_CP007627.1	710024..710248	225	10.1867	12.2395	0.311212	hypothetical protein
gene1289	FE46_RS06370	NZ_CP007627.1	complement(1465846..1466472)	627	1.82776	2.19609	0.311212	Crp Fnr family transcriptional regulator
gene1632	FE46_RS08070	NZ_CP007627.1	1854877..1855491	615	2.12962	2.55878	0.310507	PASTA domain-containing
gene951	FE46_RS04705	NZ_CP007627.1	1093379..1094245	867	1.51063	1.81505	0.310507	hydroxymethylglutaryl- lyase
gene612	FE46_RS03025	NZ_CP007627.1	complement(719068..719409)	342	1.91479	2.30066	0.310507	type II toxin-antitoxin system family toxin
gene429	FE46_RS02120	NZ_CP007627.1	507606..509114	1509	0.542461	0.651778	0.309524	GH3 auxin-responsive promoter family
gene485	FE46_RS02395	NZ_CP007627.1	complement(571808..572632)	825	25.4006	30.5193	0.308365	elongation factor Ts
gene1120	FE46_RS05550	NZ_CP007627.1	complement(1279711..1280250)	540	2.4254	2.91417	0.308062	p 4b ORF-3
gene2292	FE46_RS11355	NZ_CP007627.1	complement(2559662..2560480)	819	21.5887	25.9393	0.30672	proton channel family
gene930	FE46_RS04600	NZ_CP007627.1	complement(1073408..1075060)	1653	3.16931	3.80799	0.306253	DNA repair
gene1680	FE46_RS08310	NZ_CP007627.1	complement(1910193..1911059)	867	1.69946	2.04194	0.305655	superoxide dismutase
gene394	FE46_RS01950	NZ_CP007627.1	465419..466060	642	1.02003	1.22559	0.305655	lysine transporter
gene1121	FE46_RS05555	NZ_CP007627.1	complement(1280337..1281086)	750	0.654859	0.786826	0.305655	T9SS type A sorting domain-containing
gene2458	FE46_RS12170	NZ_CP007627.1	2747436..2749337	1902	0.86075	1.03421	0.303757	S9 family peptidase
gene2248	FE46_RS11135	NZ_CP007627.1	complement(2507512..2508627)	1116	3.66744	4.40651	0.30338	ATP-binding
gene2253	FE46_RS11160	NZ_CP007627.1	complement(2514219..2515682)	1464	0.670962	0.806175	0.302504	oligosaccharide flippase family
gene240	FE46_RS01190	NZ_CP007627.1	277942..279741	1800	0.454763	0.546407	0.301882	excinuclease ABC subunit UvrC
gene1785	FE46_RS08830	NZ_CP007627.1	2019844..2020605	762	1.93364	2.32331	0.301468	tryptophan synthase subunit alpha
gene618	FE46_RS03055	NZ_CP007627.1	complement(727679..729063)	1385	2.1277	2.55648	0.300439	Transposase and inactivated derivatives
gene627	FE46_RS13175	NZ_CP007627.1	741367..742017	651	6.28704	7.55402	0.300398	HNH endonuclease domain
gene1853	FE46_RS09165	NZ_CP007627.1	2090586..2091173	588	0.835279	1.00361	0.299417	septum formation Maf
gene2152	FE46_RS10655	NZ_CP007627.1	2417231..2417956	726	2.02952	2.43851	0.299417	histidinol phosphatase
gene2172	FE46_RS10755	NZ_CP007627.1	complement(2438779..2439660)	882	1.11371	1.33814	0.299417	glucose-1-phosphate thymidylyltransferase
gene1974	FE46_RS09770	NZ_CP007627.1	2214060..2215988	1929	0.509221	0.61184	0.299417	membrane
gene2018	FE46_RS09990	NZ_CP007627.1	2266977..2267678	702	0.699635	0.840626	0.299417	DUF2971 domain-containing
gene1523	FE46_RS07525	NZ_CP007627.1	complement(1732709..1733407)	699	0.702638	0.844234	0.299417	iron transporter
gene2362	FE46_RS11700	NZ_CP007627.1	complement(2646431..2647564)	1134	1.58806	1.90809	0.298863	beta-ketoacyl-ACP synthase III
gene2295	FE46_RS11370	NZ_CP007627.1	complement(2563956..2566340)	2385	0.617791	0.742289	0.297394	penicillin acylase family
gene442	FE46_RS13150	NZ_CP007627.1	521770..521913	144	2.27381	2.73204	0.296393	bacteriocin
gene315	FE46_RS01550	NZ_CP007627.1	complement(366587..369433)	2847	0.517538	0.621833	0.295398	DNA polymerase I
gene623	FE46_RS03085	NZ_CP007627.1	complement(734771..736155)	1385	2.00949	2.41445	0.294816	Transposase and inactivated derivatives
gene982	FE46_RS04860	NZ_CP007627.1	1126457..1126984	528	1.55033	1.86275	0.294607	isopentenyl-diphosphate Delta-isomerase
gene2448	FE46_RS12120	NZ_CP007627.1	complement(2737998..2738783)	786	4.99892	6.00631	0.294164	undecaprenyl-diphosphate phosphatase
gene2225	FE46_RS11020	NZ_CP007627.1	2485096..2485830	735	3.7866	4.54968	0.293774	23S rRNA (guanosine(2251)-2 -O)-methyltransferase
gene846	FE46_RS04195	NZ_CP007627.1	980680..981906	1227	6.27106	7.53481	0.293179	amino acid dehydrogenase
gene281	FE46_RS01380	NZ_CP007627.1	complement(325685..326623)	939	1.7435	2.09485	0.292843	outer membrane beta-barrel protein
gene247	FE46_RS01225	NZ_CP007627.1	288432..289664	1233	2.38999	2.87163	0.292454	peptidoglycan DD-metalloendopeptidase family protein
gene1157	FE46_RS05735	NZ_CP007627.1	complement(1317942..1318937)	996	2.9587	3.55494	0.292454	zinc metalloprotease
gene1376	FE46_RS06805	NZ_CP007627.1	1567960..1568373	414	1.58178	1.90055	0.291969	response regulator
gene988	FE46_RS04890	NZ_CP007627.1	1129673..1130086	414	4.74535	5.70164	0.291969	hypothetical protein
gene1546	FE46_RS07640	NZ_CP007627.1	complement(1760975..1762270)	1296	10.6111	12.7495	0.291555	DNA (cytosine-5-)-methyltransferase
gene68	FE46_RS00345	NZ_CP007627.1	complement(88578..89927)	1350	1.2127	1.45709	0.2911	magnesium transporter
gene150	FE46_RS00740	NZ_CP007627.1	complement(177926..179092)	1167	31.0034	37.2512	0.290615	iron-containing alcohol dehydrogenase
gene2366	FE46_RS11720	NZ_CP007627.1	complement(2651209..2651460)	252	0.649661	0.780582	0.287675	acyl carrier
gene1457	FE46_RS07195	NZ_CP007627.1	complement(1653540..1654358)	819	0.999479	1.20089	0.287675	3-methyl-2-oxobutanoate hydroxymethyltransferase
gene2361	FE46_RS11695	NZ_CP007627.1	complement(2645991..2646425)	435	0.376356	0.452199	0.287675	3-hydroxymyristoyl 3-hydroxydecanoyl-(acyl carrier ) dehydratase
gene1903	FE46_RS09415	NZ_CP007627.1	complement(2132941..2133753)	813	1.4096	1.69366	0.287675	purine-nucleoside phosphorylase
gene2372	FE46_RS11750	NZ_CP007627.1	2657804..2658574	771	0.637022	0.765395	0.287675	family deoxyribonuclease
gene1133	FE46_RS05615	NZ_CP007627.1	complement(1291706..1292272)	567	0.866215	1.04078	0.287675	threonylcarbamoyl-AMP synthase
gene1501	FE46_RS07415	NZ_CP007627.1	1712756..1713424	669	0.489431	0.588062	0.287675	methyltransferase domain-containing
gene1698	FE46_RS08400	NZ_CP007627.1	complement(1928647..1929813)	1167	0.701434	0.842787	0.287675	glycosyltransferase family 2
gene1461	FE46_RS07215	NZ_CP007627.1	1658545..1659126	582	4.78204	5.74572	0.286683	phosphatase
gene1984	FE46_RS09820	NZ_CP007627.1	complement(2223239..2224495)	1257	3.25606	3.91222	0.284993	MFS transporter
gene23	FE46_RS00120	NZ_CP007627.1	43058..43570	513	1.91479	2.30066	0.284882	gliding motility lipoprotein GldH
gene1640	FE46_RS08110	NZ_CP007627.1	complement(1866774..1867868)	1095	3.73778	4.49102	0.283671	redox-regulated ATPase
gene784	FE46_RS03885	NZ_CP007627.1	complement(906288..907916)	1629	13.467	16.1809	0.282589	chaperonin
gene1789	FE46_RS08850	NZ_CP007627.1	2023834..2024913	1080	9.24685	11.1103	0.282232	family secretion
gene2509	FE46_RS12425	NZ_CP007627.1	2811705..2812535	831	0.591028	0.710132	0.282143	rod shape-determining
gene1320	FE46_RS06525	NZ_CP007627.1	complement(1501373..1502509)	1137	0.719941	0.865025	0.281062	bifunctional histidinol-phosphatase imidazoleglycerol-phosphate dehydratase
gene2281	FE46_RS11300	NZ_CP007627.1	2548863..2549483	621	2.37268	2.85082	0.280346	outer membrane beta-barrel
gene1775	FE46_RS08780	NZ_CP007627.1	complement(2011166..2011477)	312	1.04945	1.26094	0.279456	rhodanese-like domain-containing
gene2497	FE46_RS12365	NZ_CP007627.1	2790249..2790602	354	0.924942	1.11134	0.279456	hypothetical protein
gene2489	FE46_RS12325	NZ_CP007627.1	2781069..2781809	741	0.441875	0.530922	0.279456	hypothetical protein
gene887	FE46_RS04400	NZ_CP007627.1	complement(1030463..1032595)	2133	1.53506	1.84441	0.27866	dipeptidyl carboxypeptidase II
gene1013	FE46_RS05015	NZ_CP007627.1	1166240..1167178	939	1.56915	1.88537	0.278572	nitronate monooxygenase
gene1415	FE46_RS06995	NZ_CP007627.1	complement(1612379..1613383)	1005	1.4661	1.76155	0.27682	DNA polymerase III subunit delta
gene2555	FE46_RS12650	NZ_CP007627.1	complement(2860552..2861721)	1170	30.644	36.8194	0.276677	ATP synthase F0 subunit A
gene380	FE46_RS01880	NZ_CP007627.1	complement(449753..450103)	351	8.86205	10.6479	0.276545	membrane-binding
gene1908	FE46_RS09440	NZ_CP007627.1	complement(2137951..2139360)	1410	0.812768	0.976557	0.276076	c-type cytochrome
gene2196	FE46_RS10875	NZ_CP007627.1	complement(2464114..2464329)	216	33.3493	40.0699	0.27552	Translation initiation factor IF-1
gene1856	FE46_RS09180	NZ_CP007627.1	complement(2093947..2094789)	843	0.776819	0.933365	0.27552	dihydropteroate synthase
gene2199	FE46_RS10890	NZ_CP007627.1	complement(2466152..2466334)	183	105.565	126.838	0.275454	50S ribosomal L30
gene1118	FE46_RS05540	NZ_CP007627.1	complement(1278196..1279254)	1059	2.62809	3.15771	0.275292	nucleoid-associated
gene2218	FE46_RS10985	NZ_CP007627.1	complement(2474742..2475047)	306	57.2466	68.783	0.275122	30S ribosomal S10
gene1429	FE46_RS07065	NZ_CP007627.1	1625282..1625689	408	2.00631	2.41062	0.274746	tRNA (adenosine(37)-N6)-threonylcarbamoyltransferase complex ATPase subunit type 1
gene1788	FE46_RS08845	NZ_CP007627.1	2022507..2023820	1314	8.22311	9.88024	0.273304	family
gene489	FE46_RS02415	NZ_CP007627.1	complement(575329..577749)	2421	2.50204	3.00626	0.272512	ribonucleoside-diphosphate reductase subunit alpha
gene340	FE46_RS01675	NZ_CP007627.1	397301..397663	363	2.25502	2.70946	0.271693	nuclear transport factor 2 family
gene456	FE46_RS02250	NZ_CP007627.1	537574..538005	432	1.13691	1.36602	0.271693	Hypothetical transmembrane
gene2120	FE46_RS10495	NZ_CP007627.1	complement(2383587..2384309)	723	0.679314	0.81621	0.271693	DUF4184 family
gene582	FE46_RS02880	NZ_CP007627.1	complement(683699..684901)	1203	3.94657	4.74189	0.269627	IS256 family transposase
gene2224	FE46_RS11015	NZ_CP007627.1	2483551..2485029	1479	1.88178	2.261	0.269056	family nutrient-binding outer membrane lipo
gene1424	FE46_RS07040	NZ_CP007627.1	complement(1618912..1619739)	828	2.17495	2.61325	0.268976	hypothetical protein
gene1096	FE46_RS05430	NZ_CP007627.1	complement(1257898..1258218)	321	2.55007	3.06397	0.268708	sterol desaturase family
gene1796	FE46_RS08885	NZ_CP007627.1	complement(2032830..2033369)	540	2.4254	2.91417	0.267972	GNAT family N-acetyltransferase
gene357	FE46_RS01765	NZ_CP007627.1	complement(423205..424029)	825	0.793768	0.953729	0.267972	thymidylate synthase
gene996	FE46_RS04930	NZ_CP007627.1	1138317..1139009	693	0.944962	1.13539	0.267972	DUF1003 domain-containing
gene2574	FE46_RS12745	NZ_CP007627.1	complement(2879609..2881297)	1689	1.64781	1.97988	0.267325	hypothetical protein
gene950	FE46_RS04700	NZ_CP007627.1	1092304..1093356	1053	1.08832	1.30764	0.265375	Dihydroorotate dehydrogenase (quinone)
gene984	FE46_RS04870	NZ_CP007627.1	1127494..1127952	459	0.713354	0.857109	0.26435	peroxiredoxin
gene631	FE46_RS03125	NZ_CP007627.1	complement(745809..746852)	1044	0.627259	0.753665	0.26435	tyrosine-type recombinase integrase
gene1105	FE46_RS05475	NZ_CP007627.1	complement(1263671..1264234)	564	2.32219	2.79016	0.262576	ferritin-like domain-containing
gene2534	FE46_RS12550	NZ_CP007627.1	complement(2837598..2838941)	1344	2.80166	3.36626	0.262194	cytochrome C biosynthesis
gene2164	FE46_RS10715	NZ_CP007627.1	complement(2430084..2431220)	1137	1.15191	1.38404	0.260826	UDP-N-acetylglucosamine 2-epimerase (non-hydrolyzing)
gene57	FE46_RS00290	NZ_CP007627.1	77939..78172	234	28.685	34.4657	0.260064	hypothetical protein
gene1700	FE46_RS08410	NZ_CP007627.1	1930472..1932334	1863	3.07569	3.69551	0.258951	ABC-F family ATP-binding cassette domain-containing
gene2283	FE46_RS11310	NZ_CP007627.1	2550197..2551012	816	2.20694	2.65168	0.258631	membrane associated
gene924	FE46_RS04575	NZ_CP007627.1	1068281..1070281	2001	2.04541	2.4576	0.258482	NAD-dependent DNA ligase
gene2026	FE46_RS10025	NZ_CP007627.1	2275440..2277281	1842	5.06609	6.08701	0.257632	DNA mismatch repair
gene1173	FE46_RS05815	NZ_CP007627.1	complement(1342055..1342396)	342	0.478698	0.575165	0.257394	arsenate reductase (glutaredoxin)
gene24	FE46_RS00125	NZ_CP007627.1	43576..45900	2325	0.985809	1.18447	0.257394	penicillin-binding protein
gene911	FE46_RS04510	NZ_CP007627.1	complement(1057741..1058214)	474	0.690779	0.829986	0.257394	23S rRNA (pseudouridine(1915)-N(3))-methyltransferase
gene29	FE46_RS00150	NZ_CP007627.1	50731..51387	657	0.49837	0.598802	0.257394	CoA transferase subunit B
gene2230	FE46_RS11045	NZ_CP007627.1	complement(2490096..2490791)	696	0.470444	0.565249	0.257394	JAB domain-containing
gene37	FE46_RS00190	NZ_CP007627.1	complement(58689..59252)	564	0.580548	0.697541	0.257394	DUF3575 domain-containing protein
gene2323	FE46_RS11505	NZ_CP007627.1	complement(2601899..2602495)	597	0.822687	0.988475	0.257394	hypothetical protein FPG87_11205
gene2110	FE46_RS10445	NZ_CP007627.1	2372885..2373124	240	4.77501	5.73728	0.257394	hypothetical protein
gene2017	FE46_RS09985	NZ_CP007627.1	2264830..2266647	1818	1.71099	2.05579	0.255976	ABC transporter ATP-binding
gene2042	FE46_RS10105	NZ_CP007627.1	complement(2291519..2292883)	1365	0.599687	0.720537	0.254713	oxygen-independent coproporphyrinogen III oxidase
gene606	FE46_RS02995	NZ_CP007627.1	complement(707726..708451)	726	4.05904	4.87702	0.254418	membrane spanning
gene1765	FE46_RS08730	NZ_CP007627.1	complement(1994925..1996868)	1944	2.86332	3.44034	0.254245	DNA topoisomerase (ATP-hydrolyzing) subunit B
gene1441	FE46_RS13240	NZ_CP007627.1	1633403..1633584	182	3.59812	4.32322	0.254051	DDE
gene1672	FE46_RS08270	NZ_CP007627.1	complement(1899486..1900433)	948	10.5344	12.6573	0.251959	thioredoxin-disulfide reductase
gene899	FE46_RS04450	NZ_CP007627.1	1043811..1045037	1227	12.5421	15.0696	0.251893	NADP-dependent isocitrate dehydrogenase
gene1839	FE46_RS09100	NZ_CP007627.1	2076365..2076784	420	3.50817	4.21514	0.25151	nucleoside-diphosphate kinase
gene2393	FE46_RS11855	NZ_CP007627.1	2685585..2686241	657	0.49837	0.598802	0.250794	NADAR family
gene2114	FE46_RS10465	NZ_CP007627.1	2377844..2378191	348	0.940889	1.1305	0.250794	carboxymuconolactone decarboxylase family
gene830	FE46_RS04115	NZ_CP007627.1	961004..963667	2664	5.03926	6.05478	0.250324	alanine--tRNA ligase
gene2237	FE46_RS11080	NZ_CP007627.1	complement(2497277..2498557)	1281	3.32286	3.99248	0.2503	family transporter
gene1076	FE46_RS05330	NZ_CP007627.1	complement(1237597..1240224)	2628	2.74104	3.29341	0.24992	valine--tRNA ligase
gene78	FE46_RS00395	NZ_CP007627.1	100778..101431	654	1.25164	1.50387	0.249514	metal-dependent transcriptional regulator
gene291	FE46_RS01430	NZ_CP007627.1	complement(337495..339777)	2283	1.43421	1.72323	0.248879	ABC transporter substrate-binding protein
gene2007	FE46_RS09935	NZ_CP007627.1	complement(2253859..2254437)	579	1.13102	1.35894	0.247619	hypothetical protein
gene2539	FE46_RS12575	NZ_CP007627.1	complement(2843257..2843511)	255	10.9143	13.1138	0.247435	prevent-host-death
gene467	FE46_RS02305	NZ_CP007627.1	548737..549300	564	4.06384	4.88279	0.247172	ribosome recycling factor
gene1394	FE46_RS06895	NZ_CP007627.1	1590947..1591813	867	0.944144	1.13441	0.246994	phosphorylase
gene44	FE46_RS00225	NZ_CP007627.1	64863..65729	867	0.944144	1.13441	0.246994	AraC family transcriptional regulator
gene1401	FE46_RS06930	NZ_CP007627.1	1596821..1598986	2166	1.20934	1.45305	0.246062	DNA mismatch repair
gene1563	FE46_RS07725	NZ_CP007627.1	1778497..1780899	2403	14.0346	16.8629	0.245717	alpha-ketoacid dehydrogenase subunit alpha beta
gene585	FE46_RS02895	NZ_CP007627.1	complement(686628..687596)	969	2.19638	2.63899	0.245468	Alpha beta hydrolase
gene1241	FE46_RS06150	NZ_CP007627.1	1410851..1411708	858	0.572429	0.687785	0.244524	nucleotidyl transferase ii ii toxin family
gene108	FE46_RS00545	NZ_CP007627.1	complement(137087..137314)	228	3.59023	4.31374	0.244524	putative addiction module component (TIGR02574 family)
gene540	FE46_RS02670	NZ_CP007627.1	632006..633637	1632	0.401261	0.482124	0.244524	site-specific DNA-methyltransferase
gene2091	FE46_RS10350	NZ_CP007627.1	complement(2354560..2355591)	1032	0.951829	1.14364	0.242503	aminodeoxychorismate lyase
gene1495	FE46_RS07385	NZ_CP007627.1	1708131..1708859	729	1.12287	1.34915	0.242103	TIGR00730 family Rossman fold
gene848	FE46_RS04205	NZ_CP007627.1	complement(983390..983938)	549	2.68385	3.2247	0.241837	hypothetical protein
gene1665	FE46_RS08235	NZ_CP007627.1	complement(1888276..1889328)	1053	0.621898	0.747223	0.241505	oxidoreductase
gene1998	FE46_RS09890	NZ_CP007627.1	2244789..2245397	609	6.98946	8.39798	0.241276	uridine kinase
gene1053	FE46_RS05215	NZ_CP007627.1	complement(1209494..1211179)	1686	0.873922	1.05004	0.240515	gamma-glutamyltransferase
gene1982	FE46_RS09810	NZ_CP007627.1	2221893..2222549	657	2.99022	3.59281	0.239534	endonuclease III
gene1750	FE46_RS08655	NZ_CP007627.1	complement(1978882..1979598)	717	6.62165	7.95605	0.23836	proton channel family
gene152	FE46_RS00750	NZ_CP007627.1	complement(180023..182908)	2886	28.08	33.7387	0.238267	TonB-dependent receptor
gene1947	FE46_RS09635	NZ_CP007627.1	2184701..2185867	1167	2.38487	2.86548	0.238218	DUF1501 domain-containing
gene338	FE46_RS01665	NZ_CP007627.1	395225..396142	918	1.96172	2.35705	0.238032	ubiquinone biosynthesis protein UbiA
gene2244	FE46_RS11115	NZ_CP007627.1	2504589..2505929	1341	0.61042	0.733432	0.237402	tryptophan repeat-containing
gene2560	FE46_RS12675	NZ_CP007627.1	complement(2864392..2866983)	2592	1.20007	1.44191	0.237039	gliding motility
gene1628	FE46_RS08050	NZ_CP007627.1	1852274..1852990	717	10.0466	12.0713	0.236984	bacillithiol biosynthesis deacetylase 1
gene2187	FE46_RS10830	NZ_CP007627.1	complement(2455659..2456948)	1290	4.8226	5.79446	0.236737	phosphopyruvate hydratase
gene808	FE46_RS04000	NZ_CP007627.1	932042..932923	882	2.59865	3.12233	0.235281	GTPase Era
gene1753	FE46_RS08670	NZ_CP007627.1	complement(1981373..1982158)	786	3.95748	4.75499	0.23288	alpha beta hydrolase
gene640	FE46_RS03170	NZ_CP007627.1	754316..756559	2244	5.5447	6.66208	0.232734	M1 family metallopeptidase
gene295	FE46_RS01450	NZ_CP007627.1	complement(342410..343192)	783	2.29995	2.76344	0.231876	DUF3050 domain-containing protein
gene1706	FE46_RS08440	NZ_CP007627.1	1935772..1935993	222	8.11199	9.74672	0.231876	DUF2795 domain-containing
gene756	FE46_RS03745	NZ_CP007627.1	complement(880390..881106)	717	7.07832	8.50475	0.231105	DUF4290 domain-containing
gene823	FE46_RS04075	NZ_CP007627.1	complement(954834..956218)	1385	1.77308	2.1304	0.230683	Transposase and inactivated derivatives
gene1496	FE46_RS07390	NZ_CP007627.1	complement(1708943..1709452)	510	1.28404	1.5428	0.23014	family
gene422	FE46_RS02085	NZ_CP007627.1	498904..499422	519	62.4576	75.0441	0.22897	DUF1573 domain-containing
gene1592	FE46_RS07870	NZ_CP007627.1	complement(1810327..1812699)	2373	5.38127	6.4657	0.228418	N/A
gene396	FE46_RS01960	NZ_CP007627.1	complement(466571..466960)	390	0.839562	1.00875	0.227464	SPOR domain-containing
gene174	FE46_RS00860	NZ_CP007627.1	complement(210196..211491)	1296	1.6422	1.97314	0.227058	tyrosine--tRNA ligase
gene1267	FE46_RS06265	NZ_CP007627.1	1445560..1447551	1992	0.821861	0.987483	0.226411	excinuclease ABC subunit
gene720	FE46_RS03570	NZ_CP007627.1	complement(844799..845662)	864	17.0536	20.4903	0.226411	sigma-70 family RNA polymerase sigma factor
gene6	FE46_RS00035	NZ_CP007627.1	11326..13599	2274	0.575953	0.69202	0.22485	AAA family ATPase
gene993	FE46_RS04915	NZ_CP007627.1	complement(1135269..1135520)	252	10.3946	12.4893	0.224205	(2Fe-2S) ferredoxin domain-containing
gene299	FE46_RS01470	NZ_CP007627.1	complement(346606..347046)	441	2.96988	3.56837	0.223565	tRNA-specific adenosine deaminase
gene1377	FE46_RS06810	NZ_CP007627.1	1568381..1568923	543	1.809	2.17355	0.222295	heme NO-binding
gene611	FE46_RS03020	NZ_CP007627.1	complement(718775..719065)	291	1.68778	2.0279	0.222295	helix-turn-helix transcriptional regulator
gene976	FE46_RS04830	NZ_CP007627.1	1120583..1120957	375	0.873145	1.0491	0.222295	fluoride efflux transporter
gene572	FE46_RS02830	NZ_CP007627.1	674093..675250	1158	1.27239	1.52881	0.222295	Fic family
gene454	FE46_RS02240	NZ_CP007627.1	complement(535181..535855)	675	1.94032	2.33134	0.222295	family transcriptional regulator
gene147	FE46_RS00725	NZ_CP007627.1	175407..175922	516	5.07642	6.09943	0.221665	N/A
gene2550	FE46_RS12625	NZ_CP007627.1	complement(2856638..2857498)	861	27.0006	32.4417	0.22039	ATP synthase F1 subunit gamma
gene1025	FE46_RS05075	NZ_CP007627.1	complement(1179416..1179775)	360	5.45716	6.55689	0.218977	family transcriptional regulator
gene1426	FE46_RS07050	NZ_CP007627.1	1620534..1622987	2454	0.40028	0.480945	0.218977	bifunctional UDP-N-acetylmuramoyl-tripeptide:D-alanyl-D-alanine ligase alanine racemase
gene155	FE46_RS00765	NZ_CP007627.1	complement(185572..186513)	942	9.73251	11.6938	0.217182	ribose-phosphate pyrophosphokinase
gene1263	FE46_RS06250	NZ_CP007627.1	complement(1441824..1443284)	1461	1.34468	1.61566	0.216553	hypothetical protein
gene514	FE46_RS02540	NZ_CP007627.1	complement(603354..603581)	228	2.15414	2.58824	0.215757	hypothetical protein
gene296	FE46_RS01455	NZ_CP007627.1	complement(343297..344301)	1005	0.4887	0.587184	0.215757	redoxin family protein
gene962	FE46_RS04760	NZ_CP007627.1	1103600..1103902	303	14.0481	16.8791	0.215513	thioredoxin
gene2221	FE46_RS11000	NZ_CP007627.1	complement(2477729..2478112)	384	58.835	70.6914	0.214795	30S ribosomal S12
gene2476	FE46_RS12260	NZ_CP007627.1	complement(2767101..2767607)	507	1.93745	2.32789	0.214182	DUF2480 family
gene403	FE46_RS01995	NZ_CP007627.1	475695..476867	1173	12.8404	15.428	0.214046	cytochrome c oxidase subunit II
gene931	FE46_RS04605	NZ_CP007627.1	complement(1075070..1075957)	888	4.79345	5.75943	0.213702	DUF4835 family
gene2334	FE46_RS11560	NZ_CP007627.1	complement(2617837..2620260)	2424	1.2157	1.46069	0.213662	MMPL family transporter
gene469	FE46_RS02315	NZ_CP007627.1	550731..551972	1242	1.18634	1.42541	0.21263	MFS transporter
gene297	FE46_RS01460	NZ_CP007627.1	344404..346155	1752	1.682	2.02096	0.211607	aspartate--tRNA ligase
gene367	FE46_RS01815	NZ_CP007627.1	complement(438704..439105)	402	76.5631	91.9921	0.211505	RNA-binding
gene2563	FE46_RS12690	NZ_CP007627.1	complement(2869603..2870208)	606	1.89109	2.27219	0.211317	DUF4254 domain-containing
gene1992	FE46_RS09860	NZ_CP007627.1	2233749..2236373	2625	0.873145	1.0491	0.211317	cyanophycin synthetase
gene1417	FE46_RS07005	NZ_CP007627.1	1613924..1614925	1002	0.816939	0.98157	0.210797	glycosyltransferase family 2
gene1254	FE46_RS06215	NZ_CP007627.1	complement(1428771..1432835)	4065	0.724936	0.871025	0.210595	type II CRISPR RNA-guided endonuclease Cas9
gene1821	FE46_RS13260	NZ_CP007627.1	2056120..2056406	287	2.28174	2.74156	0.210343	transposase family
gene809	FE46_RS04005	NZ_CP007627.1	933132..934442	1311	6.99315	8.40242	0.210343	ribosome biogenesis GTPase Der
gene763	FE46_RS03780	NZ_CP007627.1	complement(886459..887253)	795	0.823722	0.989719	0.210343	aminotransferase class IV
gene773	FE46_RS03830	NZ_CP007627.1	895527..896540	1014	0.484363	0.581972	0.209592	UDP-N-acetylmuramate dehydrogenase
gene933	FE46_RS04615	NZ_CP007627.1	complement(1077166..1077480)	315	9.35512	11.2404	0.208599	DNA-directed RNA polymerase subunit omega
gene2289	FE46_RS11340	NZ_CP007627.1	complement(2557570..2558388)	819	9.595	11.5286	0.208475	energy transducer
gene2249	FE46_RS11140	NZ_CP007627.1	complement(2508720..2509583)	864	1.51588	1.82136	0.208106	hypothetical protein
gene2467	FE46_RS12215	NZ_CP007627.1	complement(2758977..2760323)	1347	3.03851	3.65083	0.207929	acetyl- carboxylase biotin carboxylase subunit
gene1176	FE46_RS05830	NZ_CP007627.1	1344496..1345491	996	0.821861	0.987483	0.207224	UDP-3-O-(3-hydroxymyristoyl)glucosamine N-acyltransferase
gene1792	FE46_RS08865	NZ_CP007627.1	2027705..2028535	831	6.5013	7.81145	0.206905	membrane
gene2538	FE46_RS12570	NZ_CP007627.1	complement(2842998..2843255)	258	15.2293	18.2983	0.205195	Txe family addiction module toxin
gene884	FE46_RS04385	NZ_CP007627.1	1028819..1029370	552	3.55901	4.27623	0.20448	GNAT family N-acetyltransferase
gene1032	FE46_RS05110	NZ_CP007627.1	1184754..1185140	387	0.423035	0.508286	0.20377	Phosphoribosyl-ATP pyrophosphohydrolase
gene2542	FE46_RS12590	NZ_CP007627.1	complement(2845706..2846140)	435	0.376356	0.452199	0.20377	dUTP diphosphatase
gene655	FE46_RS03245	NZ_CP007627.1	complement(780822..781064)	243	1.34745	1.61898	0.20377	Hypothetical transmembrane
gene817	FE46_RS04045	NZ_CP007627.1	complement(945561..946181)	621	0.527261	0.633516	0.20377	DUF4230 domain-containing
gene1094	FE46_RS05420	NZ_CP007627.1	complement(1256985..1257650)	666	0.737453	0.886066	0.20377	lysoplasmalogenase
gene713	FE46_RS03535	NZ_CP007627.1	837733..838455	723	2.26438	2.7207	0.202925	cell division
gene1404	FE46_RS06945	NZ_CP007627.1	complement(1602432..1604048)	1617	5.16354	6.2041	0.202776	ATP-binding cassette domain-containing
gene1045	FE46_RS05175	NZ_CP007627.1	1201113..1201751	639	95.3081	114.515	0.201692	peroxiredoxin
gene217	FE46_RS01075	NZ_CP007627.1	257579..257815	237	8.28935	9.95983	0.201669	Acyl carrier protein
gene2118	FE46_RS10485	NZ_CP007627.1	2381277..2382353	1077	1.21608	1.46114	0.201669	family
gene1132	FE46_RS05610	NZ_CP007627.1	complement(1290230..1291651)	1422	2.99338	3.5966	0.20151	HD domain-containing
gene308	FE46_RS13135	NZ_CP007627.1	complement(358797..359504)	708	1.61865	1.94484	0.201373	hypothetical protein
gene1099	FE46_RS05445	NZ_CP007627.1	complement(1259531..1260028)	498	0.657489	0.789986	0.199611	N-acetyltransferase
gene1536	FE46_RS07590	NZ_CP007627.1	1752513..1753886	1374	1.90643	2.29062	0.198598	30S ribosomal S6--L-glutamate ligase
gene318	FE46_RS01565	NZ_CP007627.1	complement(371155..371784)	630	1.55919	1.8734	0.198263	polysaccharide deacetylase family protein
gene292	FE46_RS01435	NZ_CP007627.1	complement(339906..341249)	1344	16.6882	20.0512	0.197464	NADP-specific glutamate dehydrogenase
gene496	FE46_RS02450	NZ_CP007627.1	complement(583228..583656)	429	3.81619	4.58523	0.197197	dCMP deaminase family
gene1341	FE46_RS06630	NZ_CP007627.1	complement(1525515..1526750)	1236	1.05964	1.27318	0.196602	HD domain-containing
gene2553	FE46_RS12640	NZ_CP007627.1	complement(2859732..2860232)	501	37.2524	44.7596	0.196516	F0F1 ATP synthase subunit B
gene1527	FE46_RS07545	NZ_CP007627.1	complement(1738137..1738619)	483	0.677907	0.81452	0.195619	phosphoheptose isomerase
gene2168	FE46_RS10735	NZ_CP007627.1	complement(2433831..2434631)	801	1.02194	1.22788	0.195619	glycosyltransferase family 2
gene2449	FE46_RS12125	NZ_CP007627.1	complement(2738837..2739076)	240	2.04643	2.45883	0.195619	DUF3098 domain-containing
gene1897	FE46_RS09385	NZ_CP007627.1	2126904..2127452	549	0.59641	0.7166	0.195619	sigma-70 family RNA polymerase sigma factor
gene355	FE46_RS12940	NZ_CP007627.1	complement(422048..422794)	747	3.06828	3.6866	0.193957	GLPGLI family
gene970	FE46_RS04800	NZ_CP007627.1	1112297..1113640	1344	2.31442	2.78082	0.193582	adenylosuccinate lyase
gene2163	FE46_RS10710	NZ_CP007627.1	complement(2428877..2430079)	1203	0.408266	0.49054	0.193045	glycosyltransferase family 4
gene2305	FE46_RS11415	NZ_CP007627.1	complement(2576593..2577105)	513	0.638264	0.766887	0.191784	NADH dehydrogenase
gene1252	FE46_RS06205	NZ_CP007627.1	complement(1427226..1427573)	348	0.940889	1.1305	0.191784	CRISPR-associated endonuclease Cas2
gene666	FE46_RS03300	NZ_CP007627.1	complement(789597..790493)	897	6.02295	7.2367	0.19167	family
gene699	FE46_RS03465	NZ_CP007627.1	822897..823853	957	5.47426	6.57744	0.191549	gliding motility lipo
gene1029	FE46_RS05095	NZ_CP007627.1	1182509..1183219	711	1.61182	1.93663	0.191248	tRNA threonylcarbamoyladenosine dehydratase
gene1519	FE46_RS07505	NZ_CP007627.1	1728799..1729692	894	1.36877	1.64065	0.190764	family transcriptional regulator
gene963	FE46_RS04765	NZ_CP007627.1	1104351..1104560	210	16.3715	19.6707	0.190538	N/A
gene695	FE46_RS03445	NZ_CP007627.1	817775..819049	1275	6.67699	8.02254	0.189215	hypothetical protein
gene307	FE46_RS01505	NZ_CP007627.1	complement(356767..358110)	1344	0.85268	1.02451	0.189135	deoxyguanosinetriphosphate triphosphohydrolase
gene258	FE46_RS01280	NZ_CP007627.1	complement(302091..303140)	1050	6.86042	8.24294	0.188755	tRNA preQ1(34) S-adenosylmethionine ribosyltransferase-isomerase QueA
gene1520	FE46_RS07510	NZ_CP007627.1	complement(1729797..1730948)	1152	3.83706	4.61031	0.188633	N-acetyl-alpha-D-glucosaminyl L-malate synthase
gene1313	FE46_RS06490	NZ_CP007627.1	complement(1497155..1497541)	387	11.845	14.232	0.188354	acyl- thioesterase
gene1963	FE46_RS09715	NZ_CP007627.1	2203814..2204644	831	0.591028	0.710132	0.188095	SAM-dependent chlorinase fluorinase
gene1740	FE46_RS08610	NZ_CP007627.1	complement(1968314..1969234)	921	1.06654	1.28148	0.188095	WYL domain-containing
gene2537	FE46_RS12565	NZ_CP007627.1	complement(2842117..2842812)	696	0.470444	0.565249	0.188095	hypothetical protein
gene1422	FE46_RS07030	NZ_CP007627.1	complement(1617847..1618194)	348	0.470444	0.565249	0.188095	type III effector
gene2086	FE46_RS10325	NZ_CP007627.1	2350275..2351711	1437	4.10141	4.92793	0.187694	Chromosomal replication initiator
gene312	FE46_RS01535	NZ_CP007627.1	complement(363806..364411)	606	2.97172	3.57058	0.186789	Probable lipoprotein precursor
gene597	FE46_RS02950	NZ_CP007627.1	complement(698643..699650)	1008	0.812077	0.975727	0.18666	DNA cytosine methyltransferase
gene2232	FE46_RS11055	NZ_CP007627.1	complement(2492300..2492992)	693	0.708721	0.851544	0.185714	tetratricopeptide repeat
gene2192	FE46_RS10855	NZ_CP007627.1	complement(2462528..2463133)	606	41.6041	49.9881	0.185638	30S ribosomal S4
gene1816	FE46_RS08990	NZ_CP007627.1	2049608..2050981	1374	0.476607	0.572654	0.184546	M28 family peptidase
gene2191	FE46_RS10850	NZ_CP007627.1	complement(2461511..2462503)	993	24.4006	29.3178	0.184077	DNA-directed RNA polymerase subunit alpha
gene1182	FE46_RS05860	NZ_CP007627.1	1348646..1349026	381	2.14849	2.58145	0.183853	diacylglycerol kinase family
gene2267	FE46_RS11230	NZ_CP007627.1	2531658..2533388	1731	49.5589	59.5461	0.183673	gliding motility lipo
gene2549	FE46_RS12620	NZ_CP007627.1	complement(2853865..2856189)	2325	1.61954	1.94591	0.183493	N/A
gene2475	FE46_RS12255	NZ_CP007627.1	complement(2766149..2767045)	897	10.4033	12.4997	0.183152	DUF3078 domain-containing
gene1474	FE46_RS07280	NZ_CP007627.1	complement(1676173..1678506)	2334	0.771577	0.927066	0.182357	ATP-dependent DNA helicase
gene10	FE46_RS00055	NZ_CP007627.1	complement(16117..17265)	1149	1.13988	1.36958	0.181971	DNA polymerase III subunit delta'
gene2189	FE46_RS10840	NZ_CP007627.1	complement(2459550..2460656)	1107	1.18312	1.42155	0.181971	Carbamoyl-phosphate synthase small chain
gene2051	FE46_RS10150	NZ_CP007627.1	2310089..2311678	1590	2.88303	3.46402	0.181851	peptide chain release factor 3
gene2561	FE46_RS12680	NZ_CP007627.1	2867149..2868201	1053	4.04234	4.85695	0.179088	ferredoxin--NADP reductase
gene747	FE46_RS03700	NZ_CP007627.1	complement(868267..869508)	1242	1.84541	2.2173	0.178764	ABC transporter permease
gene646	FE46_RS03200	NZ_CP007627.1	763411..770649	7239	0.384466	0.461944	0.178026	cell surface
gene836	FE46_RS04145	NZ_CP007627.1	970242..970880	639	0.512409	0.61567	0.177836	pyrophosphatase
gene1181	FE46_RS05855	NZ_CP007627.1	1348146..1348643	498	1.31498	1.57997	0.177836	thiol peroxidase
gene2162	FE46_RS10705	NZ_CP007627.1	complement(2428282..2428884)	603	0.543001	0.652426	0.177836	sugar transferase
gene1972	FE46_RS09760	NZ_CP007627.1	2210944..2212062	1119	4.82805	5.801	0.176958	DNA polymerase III subunit beta
gene2087	FE46_RS10330	NZ_CP007627.1	2351733..2352173	441	1.11371	1.33814	0.176764	low molecular weight phosphotyrosine phosphatase
gene149	FE46_RS00735	NZ_CP007627.1	complement(176678..177673)	996	3.78056	4.54242	0.176579	NAD(P)H-dependent glycerol-3-phosphate dehydrogenase
gene2461	FE46_RS12185	NZ_CP007627.1	complement(2753276..2754028)	753	1.52192	1.82861	0.176461	UDP-2,3-diacylglucosamine diphosphatase
gene1284	FE46_RS06345	NZ_CP007627.1	complement(1459646..1461814)	2169	1.13219	1.36035	0.175077	cytochrome oxidase subunit I
gene450	FE46_RS02220	NZ_CP007627.1	complement(529889..530707)	819	1.59917	1.92143	0.17466	type I methionyl aminopeptidase
gene1772	FE46_RS08765	NZ_CP007627.1	complement(2005561..2008572)	3012	1.90239	2.28577	0.17466	tetratricopeptide repeat
gene1050	FE46_RS05200	NZ_CP007627.1	complement(1205764..1206144)	381	0.429697	0.51629	0.17466	four helix bundle
gene1473	FE46_RS07275	NZ_CP007627.1	complement(1675501..1676121)	621	1.05452	1.26703	0.173114	threonylcarbamoyl-AMP synthase
gene1466	FE46_RS07240	NZ_CP007627.1	complement(1666488..1668176)	1689	1.26009	1.51402	0.172762	single-stranded-DNA-specific exonuclease
gene2348	FE46_RS11630	NZ_CP007627.1	complement(2635579..2636784)	1206	0.678751	0.815533	0.1722	beta-ketoacyl-[acyl-carrier- ] synthase family
gene849	FE46_RS04210	NZ_CP007627.1	complement(983944..986199)	2256	5.22494	6.27787	0.172015	N/A
gene109	FE46_RS00550	NZ_CP007627.1	complement(137348..138709)	1362	0.72121	0.866549	0.171596	DNA repair protein RadA
gene2506	FE46_RS12410	NZ_CP007627.1	complement(2807669..2808925)	1257	2.34436	2.8168	0.171262	ABC transporter permease
gene144	FE46_RS00710	NZ_CP007627.1	complement(172303..173307)	1005	12.0546	14.4839	0.170867	MoxR family ATPase
gene2447	FE46_RS12115	NZ_CP007627.1	complement(2737294..2737998)	705	0.696658	0.837049	0.170598	tRNA pseudouridine(55) synthase
gene1650	FE46_RS08160	NZ_CP007627.1	complement(1875267..1875938)	672	10.963	13.1723	0.170202	GTP cyclohydrolase I
gene1626	FE46_RS08040	NZ_CP007627.1	complement(1851586..1852035)	450	3.27429	3.93413	0.169939	hypothetical protein
gene382	FE46_RS01890	NZ_CP007627.1	complement(451713..454547)	2835	2.65639	3.19171	0.169527	N/A
gene1354	FE46_RS06695	NZ_CP007627.1	complement(1542295..1542873)	579	4.52407	5.43576	0.169367	family transcriptional regulator
gene407	FE46_RS02015	NZ_CP007627.1	480543..482684	2142	3.21009	3.85699	0.169054	S46 family peptidase
gene334	FE46_RS01650	NZ_CP007627.1	392598..393680	1083	1.05817	1.27142	0.168637	diphosphomevalonate decarboxylase
gene593	FE46_RS13155	NZ_CP007627.1	694461..694781	321	2.04006	2.45117	0.168637	Modification methylase
gene2373	FE46_RS11755	NZ_CP007627.1	2658627..2659760	1134	0.721846	0.867313	0.167482	glycerol acyltransferase
gene343	FE46_RS12935	NZ_CP007627.1	399067..408045	8979	2.00564	2.40981	0.166962	gene=FE46_RS12935 CDS=1-8979
gene2179	FE46_RS10790	NZ_CP007627.1	complement(2447776..2448396)	621	0.790892	0.950273	0.166721	recombination
gene1653	FE46_RS08175	NZ_CP007627.1	1877483..1878256	774	0.423035	0.508286	0.165779	TIGR02757 family
gene2198	FE46_RS10885	NZ_CP007627.1	complement(2465686..2466139)	454	28.4878	34.2287	0.165601	50S ribosomal L15
gene1907	FE46_RS09435	NZ_CP007627.1	complement(2136483..2137832)	1350	1.69778	2.03992	0.16498	signal recognition particle
gene12	FE46_RS00065	NZ_CP007627.1	18166..19458	1293	115.854	139.201	0.164098	Gliding motility protein RemG
gene1979	FE46_RS09795	NZ_CP007627.1	complement(2218973..2219737)	765	1.28404	1.5428	0.163927	MBL fold metallo-hydrolase
ssrS	ssrS	NZ_CP007627.1	2273566..2273672	107	41.3112	49.6362	0.16342	N/A
gene165	FE46_RS00815	NZ_CP007627.1	194973..195524	552	2.37268	2.85082	0.163016	methyltransferase
gene755	FE46_RS03740	NZ_CP007627.1	complement(879003..880310)	1308	5.88271	7.0682	0.162785	UDP-N-acetylglucosamine 1-carboxyvinyltransferase
gene2	FE46_RS00015	NZ_CP007627.1	3959..5830	1872	5.15981	6.19962	0.162557	tRNA uridine-5-carboxymethylaminomethyl(34) synthesis enzyme MnmG
gene272	FE46_RS01335	NZ_CP007627.1	315971..316867	897	0.730054	0.877175	0.161669	gliding motility-associated ABC transporter ATP-binding subunit GldA
gene2056	FE46_RS10175	NZ_CP007627.1	complement(2321715..2322215)	501	46.4022	55.7532	0.161462	50S ribosomal L10
gene2479	FE46_RS12275	NZ_CP007627.1	complement(2768520..2769035)	516	3.17276	3.81214	0.161402	lipo
gene1506	FE46_RS07440	NZ_CP007627.1	1717526..1718608	1083	3.93036	4.72241	0.160953	glycine cleavage system aminomethyltransferase
gene1090	FE46_RS05400	NZ_CP007627.1	complement(1254493..1255470)	978	1.00438	1.20679	0.160344	family
gene2231	FE46_RS11050	NZ_CP007627.1	complement(2490910..2492268)	1359	0.481868	0.578974	0.160344	peptidoglycan synthetase
gene1691	FE46_RS08365	NZ_CP007627.1	complement(1919662..1920333)	672	3.1671	3.80534	0.160142	GTP cyclohydrolase I
gene1776	FE46_RS08785	NZ_CP007627.1	2011812..2012264	453	41.5611	49.9365	0.159548	family transcriptional regulator
gene1885	FE46_RS09325	NZ_CP007627.1	complement(2114850..2115299)	450	28.3772	34.0958	0.15914	hypothetical protein
gene751	FE46_RS03720	NZ_CP007627.1	873399..873812	414	1.58178	1.90055	0.15904	3-dehydroquinate dehydratase
gene644	FE46_RS03190	NZ_CP007627.1	760437..762752	2316	1.20171	1.44387	0.158964	NADP-dependent malic enzyme
gene1314	FE46_RS06495	NZ_CP007627.1	complement(1497538..1497954)	417	12.1706	14.6233	0.158915	NUDIX hydrolase
gene350	FE46_RS01730	NZ_CP007627.1	complement(416319..417029)	711	3.22364	3.87327	0.158122	family
gene329	FE46_RS01620	NZ_CP007627.1	386700..387299	600	1.36429	1.63922	0.157757	colicin import membrane protein
gene335	FE46_RS13140	NZ_CP007627.1	393711..393930	220	1.48832	1.78824	0.157757	hypothetical protein
gene2101	FE46_RS10400	NZ_CP007627.1	2365861..2366541	681	0.480807	0.577699	0.157757	ion transporter
gene86	FE46_RS00435	NZ_CP007627.1	108748..109569	822	0.597499	0.717907	0.157757	epimerase
gene337	FE46_RS01660	NZ_CP007627.1	394244..395182	939	10.1123	12.1501	0.157757	mevalonate kinase
gene764	FE46_RS03785	NZ_CP007627.1	complement(887308..887700)	393	0.833153	1.00105	0.157757	SRPBCC domain-containing
gene645	FE46_RS03195	NZ_CP007627.1	762826..763407	582	0.84389	1.01395	0.156079	Holliday junction branch migration
gene1928	FE46_RS09540	NZ_CP007627.1	complement(2157079..2157555)	477	1.71609	2.06191	0.155748	family membrane
gene2202	FE46_RS10905	NZ_CP007627.1	complement(2467240..2467785)	546	42.278	50.7979	0.154818	50S ribosomal L6
gene322	FE46_RS01585	NZ_CP007627.1	complement(375625..378855)	3231	1.46943	1.76555	0.154661	DUF2723 domain-containing protein
gene2197	FE46_RS10880	NZ_CP007627.1	complement(2464331..2465674)	1344	25.824	31.0281	0.154421	pre translocase subunit
gene0	FE46_RS00005	NZ_CP007627.1	1..3333	3333	0.982386	1.18036	0.153789	Putative chromosome segregation ATPase
gene1609	FE46_RS07955	NZ_CP007627.1	complement(1835985..1836449)	465	17.2517	20.7282	0.153415	DUF4870 domain-containing
gene1079	FE46_RS05345	NZ_CP007627.1	1241235..1242425	1191	11.959	14.369	0.153103	aspartate aminotransferase
gene1830	FE46_RS09055	NZ_CP007627.1	complement(2063791..2065269)	1479	0.77485	0.930998	0.152828	proline--tRNA ligase
gene2507	FE46_RS12415	NZ_CP007627.1	2809082..2810614	1533	1.6019	1.92472	0.152193	bifunctional phosphoribosylaminoimidazolecarboxamide formyltransferase IMP cyclohydrolase
gene1092	FE46_RS05410	NZ_CP007627.1	1256013..1256570	558	4.10754	4.93529	0.152148	family
gene826	FE46_RS04095	NZ_CP007627.1	complement(958212..958649)	438	4.85911	5.83832	0.152096	TPM domain-containing
gene1848	FE46_RS09140	NZ_CP007627.1	complement(2084470..2085063)	594	14.0563	16.8889	0.151897	glutathione peroxidase
gene2480	FE46_RS12280	NZ_CP007627.1	complement(2769192..2770406)	1215	4.8508	5.82834	0.151774	Cysteine desulfurase
gene423	FE46_RS02090	NZ_CP007627.1	499487..500035	549	1.19282	1.4332	0.151643	RNA methyltransferase
gene2148	FE46_RS10635	NZ_CP007627.1	complement(2412577..2413434)	858	0.572429	0.687785	0.151252	ABC transporter permease
gene2571	FE46_RS12730	NZ_CP007627.1	complement(2877218..2878201)	984	2.66203	3.19848	0.150766	NAD-dependent dehydratase
gene56	FE46_RS00285	NZ_CP007627.1	complement(75558..77618)	2061	2.70078	3.24504	0.150613	methionine--tRNA ligase
gene2367	FE46_RS11725	NZ_CP007627.1	complement(2651453..2652688)	1236	0.529821	0.636591	0.150476	beta-ketoacyl-[acyl-carrier- ] synthase family
gene1639	FE46_RS08105	NZ_CP007627.1	1863928..1866456	2529	1.4889	1.78895	0.150376	N/A
gene48	FE46_RS00245	NZ_CP007627.1	68807..69589	783	1.4636	1.75855	0.150146	enoyl-CoA hydratase
gene1124	FE46_RS05570	NZ_CP007627.1	1284282..1284902	621	21.6177	25.9741	0.148857	hypothetical protein
gene1073	FE46_RS05315	NZ_CP007627.1	complement(1234030..1235274)	1245	5.25991	6.31989	0.148309	DEAD DEAH box helicase
gene242	FE46_RS01200	NZ_CP007627.1	282164..283642	1479	5.31325	6.38399	0.14699	Amino acid permease
gene1635	FE46_RS08085	NZ_CP007627.1	complement(1858393..1861113)	2721	1.56434	1.87959	0.146827	DNA gyrase topoisomerase IV subunit A
gene427	FE46_RS02110	NZ_CP007627.1	complement(506088..506882)	795	2.0593	2.4743	0.146422	DUF2797 domain-containing
gene238	FE46_RS01180	NZ_CP007627.1	complement(276273..276836)	564	1.45137	1.74385	0.14555	5-formyltetrahydrofolate cyclo-ligase
gene2583	FE46_RS12790	NZ_CP007627.1	complement(2888482..2888910)	429	1.9081	2.29262	0.14555	ribose 5-phosphate isomerase B
gene324	FE46_RS01595	NZ_CP007627.1	complement(379131..380138)	1008	4.2228	5.07378	0.145483	class 1 fructose-bisphosphatase
gene2556	FE46_RS12655	NZ_CP007627.1	2862013..2863383	1371	0.716475	0.86086	0.145262	T9SS type A sorting domain-containing
gene1770	FE46_RS08755	NZ_CP007627.1	2001444..2003651	2208	0.9639	1.15815	0.145151	N/A
gene1041	FE46_RS05155	NZ_CP007627.1	1192983..1194185	1203	4.21875	5.06891	0.144111	cystathionine beta-lyase
gene1648	FE46_RS08150	NZ_CP007627.1	1874573..1874878	306	0.535015	0.642832	0.143838	diacylglyceryl transferase
gene1969	FE46_RS13080	NZ_CP007627.1	2207762..2208433	672	0.487246	0.585436	0.143838	class I SAM-dependent methyltransferase
gene62	FE46_RS00315	NZ_CP007627.1	complement(81815..82777)	963	8.67025	10.4175	0.143589	cell envelope biogenesis protein OmpA
gene685	FE46_RS03395	NZ_CP007627.1	809013..809381	369	8.87342	10.6616	0.143416	Sec-independent translocase
gene1623	FE46_RS08025	NZ_CP007627.1	complement(1848222..1849763)	1542	2.12341	2.55132	0.143206	hypothetical protein
gene142	FE46_RS00700	NZ_CP007627.1	complement(171174..171359)	186	7.04149	8.4605	0.142788	N/A
gene1253	FE46_RS06210	NZ_CP007627.1	complement(1427566..1428462)	897	1.27759	1.53506	0.14146	type II CRISPR-associated endonuclease Cas1
gene1936	FE46_RS09580	NZ_CP007627.1	complement(2171789..2172796)	1008	3.08589	3.70776	0.141214	ketoacyl-ACP synthase III
gene1352	FE46_RS06685	NZ_CP007627.1	1540128..1541486	1359	1.0842	1.30269	0.141072	HAMP domain-containing histidine kinase
gene1594	FE46_RS13055	NZ_CP007627.1	complement(1814043..1820975)	6933	0.637573	0.766058	0.140921	T9SS type B sorting domain-containing
gene1344	FE46_RS06645	NZ_CP007627.1	complement(1528533..1529957)	1425	1.14887	1.3804	0.140128	AAA family ATPase
gene349	FE46_RS01725	NZ_CP007627.1	415594..416322	729	0.673723	0.809492	0.139728	RNA methyltransferase
gene1275	FE46_RS13220	NZ_CP007627.1	complement(1454232..1454575)	344	0.951829	1.14364	0.139728	hypothetical protein
gene919	FE46_RS04550	NZ_CP007627.1	complement(1065580..1066272)	693	10.1583	12.2055	0.138714	response regulator transcription factor
gene1034	FE46_RS05120	NZ_CP007627.1	1186530..1187195	666	3.19563	3.83962	0.13851	tRNA (5-methylaminomethyl-2-thiouridine)(34)-methyltransferase
gene67	FE46_RS00340	NZ_CP007627.1	complement(87791..88567)	777	0.632103	0.759485	0.13841	pyrroline-5-carboxylate reductase
gene1178	FE46_RS05840	NZ_CP007627.1	complement(1346158..1346772)	615	9.31709	11.1947	0.136279	class I SAM-dependent methyltransferase
gene1534	FE46_RS07580	NZ_CP007627.1	complement(1746965..1749580)	2616	1.62713	1.95503	0.135557	DNA gyrase subunit A
gene311	FE46_RS01530	NZ_CP007627.1	complement(363111..363701)	591	5.26325	6.3239	0.135057	T9SS type A sorting domain-containing protein
gene1645	FE46_RS08135	NZ_CP007627.1	1872134..1873093	960	1.19375	1.43432	0.134777	3-phosphoglycerate dehydrogenase
gene2010	FE46_RS09950	NZ_CP007627.1	complement(2256517..2257380)	864	6.25299	7.5131	0.134041	SDR family oxidoreductase
gene1692	FE46_RS08370	NZ_CP007627.1	1920507..1920935	429	0.763238	0.917047	0.133986	hypothetical protein
gene209	FE46_RS01035	NZ_CP007627.1	complement(248063..251416)	3354	0.8298	0.997022	0.133878	transcription-repair coupling factor
gene1622	FE46_RS08020	NZ_CP007627.1	1846823..1848169	1347	1.2154	1.46033	0.132533	DEAD DEAH box helicase
gene1713	FE46_RS08475	NZ_CP007627.1	1943419..1943808	390	0.419781	0.504376	0.132175	hypothetical protein
gene201	FE46_RS00995	NZ_CP007627.1	complement(239859..240263)	405	0.404234	0.485695	0.132175	aminoacyl-tRNA hydrolase
gene591	FE46_RS02925	NZ_CP007627.1	complement(692192..692530)	339	0.965868	1.16051	0.132175	hypothetical protein
gene1817	FE46_RS08995	NZ_CP007627.1	complement(2051004..2051933)	930	2.64056	3.17269	0.132175	1,4-dihydroxy-2-naphthoate octaprenyltransferase
gene1305	FE46_RS06450	NZ_CP007627.1	1487156..1489063	1908	2.57413	3.09287	0.131465	acetate-- ligase
gene171	FE46_RS00845	NZ_CP007627.1	complement(204253..205449)	1197	0.957396	1.15033	0.131162	glycine C-acetyltransferase
gene740	FE46_RS03665	NZ_CP007627.1	863074..863709	636	13.6429	16.3922	0.13038	carbonate dehydratase
gene2070	FE46_RS10245	NZ_CP007627.1	complement(2329065..2329940)	876	2.80333	3.36826	0.130066	helix-hairpin-helix domain-containing
gene1603	FE46_RS07925	NZ_CP007627.1	1829838..1831121	1284	15.4279	18.537	0.129997	fumarylacetoacetase
gene1810	FE46_RS13075	NZ_CP007627.1	2044071..2045375	1305	0.878163	1.05513	0.129672	hypothetical protein
gene2204	FE46_RS10915	NZ_CP007627.1	complement(2468338..2468607)	270	26.0731	31.3273	0.129569	30S ribosomal S14
gene1000	FE46_RS04950	NZ_CP007627.1	complement(1144984..1146171)	1188	4.54763	5.46407	0.129419	tRNA 2-thiouridine(34) synthase
gene2048	FE46_RS10135	NZ_CP007627.1	complement(2301600..2303534)	1935	1.60753	1.93149	0.128697	family
gene63	FE46_RS00320	NZ_CP007627.1	complement(82848..83609)	762	2.79303	3.35589	0.128437	Exodeoxyribonuclease III
gene1766	FE46_RS08735	NZ_CP007627.1	complement(1997141..1998757)	1617	0.607476	0.729895	0.128135	asparagine synthase B
gene1306	FE46_RS06455	NZ_CP007627.1	complement(1489201..1489767)	567	1.44369	1.73463	0.128023	DNA polymerase III subunit epsilon
gene2263	FE46_RS11210	NZ_CP007627.1	complement(2524689..2525687)	999	3.93308	4.72568	0.127995	pyruvate dehydrogenase (acetyl-transferring) E1 component subunit alpha
gene2075	FE46_RS10270	NZ_CP007627.1	complement(2334515..2336437)	1923	1.19189	1.43208	0.127975	porin [Flavobacterium psychrophilum DSM 3660]
gene1054	FE46_RS05220	NZ_CP007627.1	complement(1211260..1213032)	1773	2.2161	2.66269	0.127856	long-chain fatty acid-- ligase
gene2501	FE46_RS12385	NZ_CP007627.1	2795499..2796710	1212	1.08062	1.29839	0.127856	tetracycline resistance MFS efflux pump
gene1482	FE46_RS07320	NZ_CP007627.1	complement(1688362..1689849)	1488	3.63077	4.36244	0.127075	aminotransferase class V-fold PLP-dependent enzyme
gene2145	FE46_RS10620	NZ_CP007627.1	complement(2409973..2410602)	630	1.03946	1.24893	0.126206	acetyltransferase
gene178	FE46_RS00880	NZ_CP007627.1	complement(214424..215149)	726	2.02952	2.43851	0.125755	polyprenol monophosphomannose synthase
gene1057	FE46_RS05235	NZ_CP007627.1	complement(1214053..1214790)	738	2.66203	3.19848	0.125665	alpha beta hydrolase
gene1240	FE46_RS06145	NZ_CP007627.1	1410051..1410851	801	0.408776	0.491153	0.125397	hypothetical protein
gene745	FE46_RS03690	NZ_CP007627.1	866876..867370	495	2.31516	2.78171	0.125397	GNAT family N-acetyltransferase
gene1705	FE46_RS08435	NZ_CP007627.1	1935028..1935597	570	2.01053	2.41569	0.124939	cob(I)yrinic acid a,c-diamide adenosyltransferase
gene401	FE46_RS01985	NZ_CP007627.1	473660..474205	546	13.493	16.2121	0.124899	cytochrome c
gene20	FE46_RS00105	NZ_CP007627.1	complement(38718..39536)	819	0.799583	0.960716	0.124598	OmpA family protein
gene2468	FE46_RS12220	NZ_CP007627.1	complement(2760412..2760891)	480	1.70536	2.04903	0.124124	acetyl- carboxylase biotin carboxyl carrier
gene981	FE46_RS04855	NZ_CP007627.1	1124457..1126247	1791	57.2224	68.7539	0.124061	30S ribosomal S1
gene1001	FE46_RS04955	NZ_CP007627.1	complement(1146229..1147383)	1155	0.99221	1.19216	0.123586	Na+ H+ antiporter
gene1664	FE46_RS08230	NZ_CP007627.1	1887665..1888123	459	3.56677	4.28555	0.122876	sensor of ECF-type sigma factor
gene2193	FE46_RS10860	NZ_CP007627.1	complement(2463225..2463608)	384	6.3951	7.68385	0.122671	30S ribosomal S11
gene861	FE46_RS04270	NZ_CP007627.1	1000450..1001091	642	2.55007	3.06397	0.122568	N/A
gene2558	FE46_RS12665	NZ_CP007627.1	complement(2863781..2864008)	228	0.718047	0.862748	0.122262	family
gene527	FE46_RS02605	NZ_CP007627.1	complement(614600..616183)	1584	1.34362	1.61438	0.121794	IS1182 family transposase
gene1015	FE46_RS12970	NZ_CP007627.1	complement(1169168..1169821)	654	1.50197	1.80465	0.121755	hypothetical protein
gene446	FE46_RS02200	NZ_CP007627.1	525007..527160	2154	0.380025	0.456608	0.120455	peptidase domain-containing ABC transporter
gene2107	FE46_RS10430	NZ_CP007627.1	complement(2370692..2372254)	1563	0.837951	1.00682	0.120381	FAD-binding
gene1553	FE46_RS07675	NZ_CP007627.1	complement(1766644..1767816)	1173	2.37268	2.85082	0.120316	RNA methyltransferase
gene1774	FE46_RS08775	NZ_CP007627.1	complement(2009664..2011193)	1530	1.49804	1.79993	0.119907	monooxygenase
gene729	FE46_RS03610	NZ_CP007627.1	complement(855084..855713)	630	9.09526	10.9281	0.119865	flavin oxidoreductase
gene345	FE46_RS01705	NZ_CP007627.1	409022..410956	1935	1.60753	1.93149	0.118975	family
gene1026	FE46_RS05080	NZ_CP007627.1	complement(1179841..1181073)	1233	1.99166	2.39302	0.118509	MFS transporter
gene1781	FE46_RS08810	NZ_CP007627.1	2015913..2016905	993	3.95685	4.75424	0.118437	Anthranilate phosphoribosyltransferase
gene608	FE46_RS03005	NZ_CP007627.1	711370..711876	507	11.3018	13.5793	0.118373	Hypothetical transmembrane
gene2209	FE46_RS10940	NZ_CP007627.1	complement(2470141..2470332)	192	17.0536	20.4903	0.11827	50S ribosomal L29
gene630	FE46_RS03120	NZ_CP007627.1	complement(743727..744995)	1269	4.25735	5.1153	0.117543	DNA cytosine methyltransferase
gene960	FE46_RS04750	NZ_CP007627.1	1103038..1103397	360	5.00239	6.01048	0.117457	sulfurtransferase
gene845	FE46_RS04190	NZ_CP007627.1	979939..980520	582	26.1606	31.4325	0.117251	chalcone isomerase
gene1074	FE46_RS05320	NZ_CP007627.1	complement(1235383..1236417)	1035	0.94907	1.14033	0.116904	arginase
gene1652	FE46_RS08170	NZ_CP007627.1	1876690..1877352	663	1.97544	2.37353	0.116788	ABC transporter ATP-binding
gene1072	FE46_RS05310	NZ_CP007627.1	complement(1233099..1233656)	558	0.586791	0.705042	0.11644	family
gene417	FE46_RS02060	NZ_CP007627.1	490811..491338	528	1.86039	2.2353	0.11644	Hypothetical transmembrane
gene306	FE46_RS01500	NZ_CP007627.1	complement(355290..356681)	1392	0.705667	0.847873	0.11598	T9SS type A sorting domain-containing protein
gene1744	FE46_RS08625	NZ_CP007627.1	complement(1972495..1973031)	537	3.35356	4.02937	0.115938	sigma-70 family RNA polymerase sigma factor
gene1431	FE46_RS07075	NZ_CP007627.1	1626979..1627353	375	2.18286	2.62275	0.115888	DUF4258 domain-containing
gene526	FE46_RS02600	NZ_CP007627.1	613396..614487	1092	0.749609	0.900671	0.115342	Hypothetical transmembrane
gene994	FE46_RS04920	NZ_CP007627.1	complement(1135695..1136930)	1236	0.927187	1.11403	0.115264	imidazolonepropionase
gene862	FE46_RS04275	NZ_CP007627.1	1001367..1002299	933	7.72073	9.27662	0.114886	peptidylprolyl isomerase
gene2551	FE46_RS12630	NZ_CP007627.1	complement(2857604..2859181)	1578	39.3206	47.2445	0.114703	F0F1 ATP synthase subunit alpha
gene2562	FE46_RS12685	NZ_CP007627.1	complement(2868511..2869554)	1044	0.940889	1.1305	0.114621	heptosyltransferase
gene406	FE46_RS02010	NZ_CP007627.1	complement(479467..480075)	609	0.806476	0.968998	0.113732	hypothetical protein
gene59	FE46_RS00300	NZ_CP007627.1	79224..80180	957	3.42141	4.1109	0.1136	Putative carboxypeptidase
gene605	FE46_RS02990	NZ_CP007627.1	706489..706995	507	10.9789	13.1914	0.113113	Hypothetical transmembrane
gene1175	FE46_RS05825	NZ_CP007627.1	1343422..1344471	1050	0.467756	0.562019	0.112857	O-succinylbenzoic acid-- ligase
gene610	FE46_RS03015	NZ_CP007627.1	713953..714459	507	10.656	12.8034	0.112857	Hypothetical transmembrane
gene2111	FE46_RS10450	NZ_CP007627.1	complement(2373793..2375988)	2196	4.02577	4.83705	0.112138	DNA helicase
gene1644	FE46_RS08130	NZ_CP007627.1	1871011..1872081	1071	1.07003	1.28566	0.111147	Phosphoserine aminotransferase
gene2512	FE46_RS12440	NZ_CP007627.1	2814972..2816228	1257	0.390727	0.469467	0.111147	rod shape-determining
gene1624	FE46_RS08030	NZ_CP007627.1	1850017..1850445	429	2.28972	2.75114	0.110728	family thioesterase
gene1600	FE46_RS07910	NZ_CP007627.1	complement(1826216..1827061)	846	5.999	7.20792	0.109938	transketolase
gene1854	FE46_RS09170	NZ_CP007627.1	2091448..2092200	753	1.3045	1.56738	0.109488	tRNA pseudouridine(38-40) synthase
gene2535	FE46_RS12555	NZ_CP007627.1	complement(2839384..2840328)	945	1.55919	1.8734	0.108946	alpha beta hydrolase
gene2517	FE46_RS12465	NZ_CP007627.1	complement(2820076..2821677)	1602	1.83949	2.21019	0.108812	lipo
[truncated: 494 more rows]
