# Supplementary material for: Dual RNA-Seq of Flavobacterium psychrophilum and Its Outer Membrane Vesicles Distinguishes Genes Associated with Susceptibility to Bacterial Cold-Water Disease in Rainbow Trout (Oncorhynchus mykiss)
Source: Pathogens. 2023 Mar 10;12(3):436. doi: 10.3390/pathogens12030436 (PMC10057207; doi:10.3390/pathogens12030436)
Supplement: Supplementary file 1 [file pathogens-12-00436-s001.zip › Supplementary file S2.xlsx]

## Sheet: Resistant vs susceptible
Additional file S2: Differentially expressed bacterial transcripts in susceptible and resistant fish on day 5 post-infection (R/S)
Feature ID	Fold change	P-value	FDR p-value correction	Gene description
FE46_RS03770	-12667.9	3.02082e-11	7.83903e-08	Belongs to the bacterial histone-like protein family
FE46_RS11385	-5325.84	1.95467e-09	1.98569e-06	50S ribosomal L27
FE46_RS10860	-4817.24	2.29559e-09	1.98569e-06	30S ribosomal S11
FE46_RS00060	-4177.16	5.12174e-09	2.65818e-06	hypothetical protein
FE46_RS09965	-4147.77	4.91347e-09	2.65818e-06	type B 50S ribosomal L31
FE46_RS10170	-3149.64	1.54328e-08	6.67467e-06	50S ribosomal L7 L12
FE46_RS13195	-3028.56	0.00117539	0.00829164	hypothetical protein, partial
FE46_RS01825	-2861.66	2.11665e-08	7.84673e-06	30S ribosomal S16
FE46_RS09100	-2517.19	4.70144e-08	1.25855e-05	nucleoside-diphosphate kinase
FE46_RS00765	-2296.5	3.37058e-08	1.09333e-05	ribose-phosphate pyrophosphokinase
FE46_RS07740	-2102.58	5.03056e-08	1.25855e-05	Domain of unknown function (DUF4293)
FE46_RS10955	-2047.35	6.25964e-08	1.25855e-05	50S ribosomal L22
FE46_RS00725	-1900.49	6.30488e-08	1.25855e-05	OmpA family outer membrane protein
FE46_RS00895	-1793.43	8.99138e-08	1.66662e-05	leucine-rich repeat protein
FE46_RS05855	-1642.79	1.6472e-07	2.84966e-05	thiol peroxidase
FE46_RS09220	-1539.74	3.35455e-07	3.95684e-05	50S ribosomal L28
FE46_RS04560	-1482.47	2.09807e-07	3.40281e-05	30S ribosomal protein S18
FE46_RS05460	-1402.41	2.4644e-07	3.76184e-05	heavy-metal-associated domain-containing
FE46_RS00770	-1366.71	3.21837e-07	3.95684e-05	N/A
FE46_RS03210	-1362.06	2.90209e-07	3.95684e-05	Glycine cleavage system H
FE46_RS10225	-1340.64	3.03694e-07	3.95684e-05	RNA polymerase subunit sigma-54
FE46_RS01840	-1330.08	3.33889e-07	3.95684e-05	acyl-CoA dehydrogenase
FE46_RS01670	-1277.28	3.86858e-07	4.36476e-05	Belongs to the pseudouridine synthase RsuA family
FE46_RS09020	-1204.81	4.32278e-05	0.00151589	Cell wall-associated hydrolase
FE46_RS02400	-1197.37	4.50436e-07	4.87033e-05	Belongs to the universal ribosomal protein uS2 family
FE46_RS06560	-1161.58	5.68169e-07	5.8976e-05	reductase
FE46_RS01685	-1152.91	8.97867e-07	6.87244e-05	hypothetical protein
FE46_RS02205	-1111.75	6.04294e-07	5.97486e-05	Cobalt transporter
FE46_RS12915	-1103.71	6.73902e-07	6.03026e-05	leucine-rich repeat protein
FE46_RS03715	-1092.77	6.21662e-07	5.97486e-05	Outer membrane protein beta-barrel domain
FE46_RS04765	-1092.61	6.4639e-07	5.99065e-05	hypothetical protein
FE46_RS10080	-1056.83	7.0371e-07	6.08709e-05	cytochrome c oxidase
FE46_RS10890	-1036.8	8.45865e-07	6.87244e-05	Ribosomal protein L30
FE46_RS04595	-1008.37	8.48749e-07	6.87244e-05	trans-2-enoyl- reductase family
FE46_RS05125	-1005.75	1.64313e-06	0.000115241	hypothetical protein
FE46_RS05240	-981.827	1.00672e-06	7.46414e-05	Peptidase M48
FE46_RS01250	-980.276	9.00435e-07	6.87244e-05	biotin synthase BioB
FE46_RS05500	-955.039	1.9873e-06	0.000132232	Belongs to the bacterial histone-like protein family
FE46_RS10240	-935.857	1.27172e-06	9.16698e-05	Acyl-CoA dehydrogenase, C-terminal domain
FE46_RS08790	-876.714	1.90255e-06	0.000129924	nitroreductase
FE46_RS12640	-864.534	2.25341e-06	0.000141127	F0F1 ATP synthase subunit B
FE46_RS08340	-863.022	2.26213e-06	0.000141127	ribosome silencing factor
FE46_RS12295	-838.393	2.49582e-06	0.00015062	Fe-S cluster assembly ATPase
FE46_RS06975	-834.485	2.28413e-06	0.000141127	fructose-6-phosphate aldolase
FE46_RS12625	-796.699	3.31207e-06	0.000190996	ATP synthase F1 subunit gamma
FE46_RS07905	-792.844	3.17369e-06	0.000187175	Transketolase
FE46_RS10250	-788.16	3.84339e-06	0.000212204	PspC family transcriptional regulator
FE46_RS12890	-779.517	3.82796e-06	0.000212204	leucine-rich repeat protein
FE46_RS09250	-757.285	4.00359e-06	0.000216444	peptidyl-prolyl
FE46_RS03585	-748.622	5.0372e-06	0.000257657	30S ribosomal S15
FE46_RS00915	-747.079	7.9281e-06	0.000367398	leucine-rich repeat protein
FE46_RS06935	-742.094	5.71457e-06	0.000279798	hypothetical protein
FE46_RS12305	-733.474	4.69675e-06	0.000248736	Belongs to the HesB IscA family
FE46_RS01855	-726.289	5.16307e-06	0.000257657	Domain of unknown function (DUF1732)
FE46_RS06880	-717.923	5.10081e-06	0.000257657	Belongs to the iron ascorbate-dependent oxidoreductase family
FE46_RS05455	-716.967	7.92844e-06	0.000367398	Protein of unknown function (DUF2853)
FE46_RS05055	-693.097	8.32649e-06	0.000379074	peptide deformylase
FE46_RS09210	-681.311	1.49572e-05	0.000626033	Domain of unknown function (DUF4295)
FE46_RS12920	-670.977	1.49212e-05	0.000626033	leucine-rich repeat protein
FE46_RS07910	-644.582	1.02148e-05	0.000457022	Transketolase
FE46_RS01985	-630.105	1.78071e-05	0.000710915	Cytochrome C oxidase, cbb3-type, subunit III
FE46_RS03890	-619.813	2.44447e-05	0.000932853	co-chaperone GroES
FE46_RS11220	-616.185	1.40058e-05	0.000605752	long-chain fatty acid transport protein
FE46_RS09055	-597.117	1.65941e-05	0.000672838	proline--tRNA ligase
FE46_RS02390	-596.924	1.63074e-05	0.000671709	PAS fold
FE46_RS05465	-584.485	2.22181e-05	0.000873575	hypothetical protein
FE46_RS12230	-573.544	4.00066e-05	0.00142215	50S ribosomal L32
FE46_RS07935	-569.919	2.32271e-05	0.000899617	Putative auto-transporter adhesin, head GIN domain
FE46_RS10940	-565.927	2.86317e-05	0.00104743	Belongs to the universal ribosomal protein uL29 family
FE46_RS08140	-559.779	2.5964e-05	0.000976473	Bacterial protein of unknown function (DUF937)
FE46_RS04840	-541.756	2.86581e-05	0.00104743	PyrR protein
FE46_RS06315	-532.635	4.58264e-05	0.00158559	C-terminal domain of 1-Cys peroxiredoxin
FE46_RS09215	-513.916	5.06662e-05	0.00170752	50S ribosomal L33
FE46_RS07440	-513.661	6.73088e-05	0.00218333	glycine cleavage system aminomethyltransferase
FE46_RS00465	-489.606	4.86331e-05	0.00166056	succinate dehydrogenase
FE46_RS11500	-477.691	5.16985e-05	0.00171997	Pkd domain containing protein
FE46_RS09505	-468.472	6.23499e-05	0.00204808	Imelysin
FE46_RS03880	-468.034	7.10705e-05	0.00222502	DUF2892 domain-containing
FE46_RS01280	-466.035	7.00439e-05	0.00222502	tRNA preQ1(34) S-adenosylmethionine ribosyltransferase-isomerase QueA
FE46_RS04880	-460.811	7.11664e-05	0.00222502	hypothetical protein
FE46_RS10320	-456.021	7.41913e-05	0.00226502	thioesterase
FE46_RS01220	-451.435	7.84453e-05	0.00236704	Tryptophan 2,3-dioxygenase
FE46_RS01560	-447.06	0.00145899	0.0100962	Thioredoxin
FE46_RS03775	-443.473	9.84256e-05	0.00257653	transcriptional regulator
FE46_RS04100	-442.587	9.73847e-05	0.00257653	LemA family
FE46_RS04395	-440.822	9.90285e-05	0.00257653	SsrA-binding protein SmpB
FE46_RS07540	-432.663	0.000112156	0.00257653	CoB--CoM heterodisulfide reductase
FE46_RS06580	-431.826	0.000103186	0.00257653	Exopolyphosphatase
FE46_RS09805	-428.674	0.000107251	0.00257653	Thiol peroxidase
FE46_RS08440	-425.304	0.00166728	0.0113858	Protein of unknown function (DUF2795)
FE46_RS07395	-420.11	0.000116805	0.00257653	winged helix-turn-helix transcriptional regulator
FE46_RS07950	-415.587	0.000139166	0.00257744	family transcriptional regulator
FE46_RS01075	-413.313	0.000184623	0.00271124	Acyl carrier protein
FE46_RS03655	-409.971	0.000129004	0.00257653	hypothetical protein
FE46_RS05515	-408.224	0.000135032	0.00257653	gliding motility protein GldD
FE46_RS07895	-403.545	0.00014333	0.00258066	Phosphoribosylformylglycinamidine cyclo-ligase
FE46_RS01170	-400.587	0.00177481	0.0120252	Molecular chaperone DnaK
FE46_RS01990	-398.571	0.000160146	0.00266482	Quinol cytochrome C oxidoreductase
FE46_RS10730	-397.738	0.000119177	0.00257653	Male sterility protein
FE46_RS03920	-392.603	0.000158561	0.00266482	hypothetical protein
FE46_RS08300	-391.88	0.000129732	0.00257653	tRNA guanosine(34) transglycosylase Tgt
FE46_RS00160	-391.301	0.000131398	0.00257653	3'-5' exonuclease
FE46_RS08075	-390.792	0.000121254	0.00257653	family pseudouridine synthase
FE46_RS11020	-384.773	0.000131225	0.00257653	Belongs to the class IV-like SAM-binding methyltransferase superfamily. RNA methyltransferase TrmH family
FE46_RS00270	-381.31	0.000156298	0.00266482	HAD family hydrolase
FE46_RS05225	-380.428	0.000148505	0.00262156	Peptide-methionine (R)-S-oxide reductase
FE46_RS01385	-376.314	0.000183109	0.00271124	deoxynucleoside kinase
FE46_RS02440	-375.19	0.000191781	0.00276096	pyridine nucleotide-disulfide oxidoreductase
FE46_RS03875	-374.516	0.00017925	0.00270438	Belongs to the bacterial ribosomal protein bL34 family
FE46_RS11065	-370.089	0.000184703	0.00271124	BON domain
FE46_RS00985	-362.004	0.000239644	0.00287738	Uroporphyrinogen-III synthase
FE46_RS03285	-361.154	0.000213023	0.00282038	Peptidase, M22
FE46_RS00100	-359.739	0.000225534	0.00286727	GNAT family acetyltransferase
FE46_RS00700	-348.54	0.000328635	0.00315046	N/A
FE46_RS07385	-348.464	0.00026494	0.00293101	Belongs to the LOG family
FE46_RS04495	-346.401	0.00021963	0.00286727	WxcM domain-containing protein
FE46_RS11035	-345.865	0.000222479	0.00286727	hypothetical protein
FE46_RS12080	-341.09	0.000264072	0.00293101	Flavin reductase
FE46_RS03490	-340.988	0.000259002	0.00293101	16S rRNA (cytosine(1402)-N(4))-methyltransferase
FE46_RS09935	-339.022	0.00030096	0.0030258	DUF5683 domain-containing protein
FE46_RS08120	-333.947	0.000342377	0.00321909	Ferredoxin
FE46_RS09070	-333.938	0.000260612	0.00293101	30S ribosomal S12 methylthiotransferase
FE46_RS00095	-329.973	0.000266326	0.00293101	transglycosylase
FE46_RS06610	-325.205	0.000300028	0.0030258	elongation factor P
FE46_RS01880	-324.82	0.000366209	0.00334617	Membrane-binding protein
FE46_RS01420	-319.729	0.000266558	0.00293101	methionine adenosyltransferase
FE46_RS11195	-317.547	0.000258824	0.00293101	metallopeptidase
FE46_RS07155	-315.104	0.00305106	0.0185342	50S ribosomal L35
FE46_RS03300	-314.314	0.000363517	0.00333331	Nitrogen fixation protein NifU
FE46_RS05480	-314.146	0.000280395	0.0029759	Ferredoxin--NADP reductase
FE46_RS00565	-313.006	0.000411005	0.00360323	aspartate 1-decarboxylase
FE46_RS04675	-312.376	0.000371045	0.00335492	response regulator transcription factor
FE46_RS07525	-312.157	0.000280985	0.0029759	VIT family
FE46_RS08040	-311.705	0.000282109	0.0029759	hypothetical protein
FE46_RS09890	-310.516	0.000276085	0.0029759	uridine kinase
FE46_RS11855	-306.957	0.000264067	0.00293101	Domain of unknown function (DUF1768)
FE46_RS09040	-302.227	0.000511486	0.00421367	30S ribosomal protein S20
FE46_RS01820	-300.422	0.000307099	0.0030258	DUF6252 family protein
FE46_RS12885	-297.679	0.000280018	0.0029759	leucine-rich repeat protein
FE46_RS12220	-295.735	0.000281307	0.0029759	acetyl- carboxylase biotin carboxyl carrier
FE46_RS08215	-293.317	0.00040771	0.00359867	ABC transporter, ATP-binding protein
FE46_RS10395	-292.671	0.000305962	0.0030258	Belongs to the pseudouridine synthase RsuA family
FE46_RS04860	-291.397	0.000247457	0.00289801	isopentenyl-diphosphate Delta-isomerase
FE46_RS04105	-290.96	0.00034489	0.00323101	family transcriptional regulator
FE46_RS08365	-288.908	0.000326393	0.00314866	GTP cyclohydrolase
FE46_RS09140	-287.149	0.000240613	0.00287738	Belongs to the glutathione peroxidase family
FE46_RS11640	-281.718	0.000534604	0.00437634	acyl carrier protein
FE46_RS09800	-281.677	0.000237022	0.00286727	Nicotinate-nucleotide adenylyltransferase
FE46_RS11605	-281.565	0.000308343	0.0030258	Outer membrane protein beta-barrel domain
FE46_RS08745	-278.505	0.000230897	0.00286727	aspartate-semialdehyde dehydrogenase
FE46_RS02880	-277.96	0.000235243	0.00286727	Transposase, Mutator family
FE46_RS07970	-277.534	0.000314813	0.0030712	nucleotide exchange factor
FE46_RS07695	-272.796	0.000225267	0.00286727	N-acetylmuramic acid 6-phosphate etherase
FE46_RS12905	-269.539	0.00286645	0.0176762	leucine-rich repeat protein
FE46_RS11745	-269.404	0.000393932	0.0035129	pyridine nucleotide-disulfide oxidoreductase
FE46_RS11940	-268.392	0.00293975	0.0180346	hypothetical protein
FE46_RS00620	-267.204	0.000370173	0.00335492	Secretion protein
FE46_RS07035	-267.024	0.000237558	0.00286727	16S rRNA (cytidine(1402)-2 -O)-methyltransferase
FE46_RS08415	-261.461	0.000557205	0.00449052	response regulator
FE46_RS01090	-257.183	0.00027003	0.00295666	ribonuclease III
FE46_RS09690	-256.638	0.000251024	0.00291329	Domain of unknown function (DUF4294)
FE46_RS01275	-255.903	0.00023032	0.00286727	ABC transporter permease
FE46_RS00640	-255.461	0.000302132	0.0030258	phenylalanine--tRNA ligase subunit alpha
FE46_RS08680	-254.722	0.000325029	0.0031472	Belongs to the OMP decarboxylase family. Type 2 subfamily
FE46_RS00405	-252.447	0.000245882	0.00289801	Prolyl 4-hydroxylase alpha subunit homologues.
FE46_RS11105	-249.749	0.000274072	0.00297581	5-(carboxyamino)imidazole ribonucleotide mutase
FE46_RS04550	-248.58	0.000376562	0.00338124	response regulator transcription factor
FE46_RS00245	-247.185	0.000224031	0.00286727	Belongs to the enoyl-CoA hydratase isomerase family
FE46_RS06620	-244.029	0.000229218	0.00286727	bifunctional UDP-3-O-[3-hydroxymyristoyl] N-acetylglucosamine deacetylase 3-hydroxyacyl-ACP dehydratase
FE46_RS00545	-240.767	0.00262762	0.0165521	putative addiction module component (TIGR02574 family)
FE46_RS04870	-240.538	0.000203334	0.00277712	Alkyl hydroperoxide reductase
FE46_RS06415	-237.555	0.000235435	0.00286727	Universal stress protein family
FE46_RS10820	-236.238	0.000173852	0.0026995	Cytochrome C biogenesis protein CcmF
FE46_RS07060	-235.669	0.000176133	0.00270438	PglZ domain-containing protein
FE46_RS10015	-235.4	0.000163278	0.00266482	cell division protein ZapA
FE46_RS06900	-234.635	0.000292443	0.00302092	GNAT family acetyltransferase
FE46_RS11135	-231.793	0.000129891	0.00257653	Domain of unknown function (DUF4143)
FE46_RS09835	-230.891	0.00015364	0.00265797	Belongs to the sigma-70 factor family. ECF subfamily
FE46_RS12635	-227.882	0.000184928	0.00271124	ATP synthase F1 subunit delta
FE46_RS07555	-226.046	0.000153441	0.00265797	Organic solvent ABC transporter substrate-binding protein
FE46_RS04385	-223.862	0.000170404	0.00269366	Acetyltransferase
FE46_RS06280	-221.705	0.000210157	0.00281522	Protein of unknown function (DUF1456)
FE46_RS03755	-221.233	0.000147619	0.00262156	AAA domain
FE46_RS06500	-220.547	0.00233253	0.0150946	lactoylglutathione lyase activity
FE46_RS10805	-220.534	0.000115597	0.00257653	UPF0056 membrane protein
FE46_RS12265	-218.402	0.000212678	0.00282038	FeS assembly SUF system protein
FE46_RS01700	-218.075	0.000170574	0.00269366	type IX secretion system membrane
FE46_RS05485	-217.945	0.00225823	0.014687	Nitrogen fixation protein NifU
FE46_RS06890	-217.267	0.000218195	0.00286727	Translation initiation factor
FE46_RS08575	-217.005	0.00255472	0.016209	Transposase
FE46_RS08005	-216.388	0.000356599	0.00329315	Orotate phosphoribosyltransferase
FE46_RS03625	-215.215	0.000122106	0.00257653	Histidine kinase
FE46_RS12705	-214.679	0.000103471	0.00257653	uracil phosphoribosyltransferase
FE46_RS10760	-212.412	0.00010214	0.00257653	Belongs to the NAD(P)-dependent epimerase dehydratase family. dTDP-glucose dehydratase subfamily
FE46_RS02775	-211.084	0.000138769	0.00257744	Protein of unknown function (DUF1016)
FE46_RS01105	-207.526	0.000118221	0.00257653	Bacterial PH domain
FE46_RS05060	-207.246	0.000100457	0.00257653	malate quinone oxidoreductase
FE46_RS01125	-205.961	0.000111318	0.00257653	crossover junction endodeoxyribonuclease RuvC
FE46_RS04325	-205.664	0.000115715	0.00257653	Putative quorum-sensing-regulated virulence factor
FE46_RS11330	-205.413	0.000172311	0.00269366	PBP superfamily domain
FE46_RS09335	-205.308	0.000113475	0.00257653	amine dehydrogenase activity
FE46_RS12665	-202.993	0.000199192	0.00277712	F0F1-ATPase subunit
FE46_RS03145	-202.673	0.000144199	0.00258066	Acetyltransferase
FE46_RS11830	-200.109	0.000102986	0.00257653	hypothetical protein
FE46_RS05185	-199.553	0.00209211	0.0139206	hypothetical protein
FE46_RS04070	-196.52	0.000122667	0.00257653	Major facilitator superfamily
FE46_RS10155	-196.244	0.00251706	0.0160092	Protein of unknown function (DUF3467)
FE46_RS10785	-195.25	0.000100663	0.00257653	sugar transporter
FE46_RS00540	-194.569	0.00019072	0.00276096	ParE toxin of type II toxin-antitoxin system, parDE
FE46_RS02455	-193.703	0.000210463	0.00281522	HupE UreJ protein
FE46_RS11480	-193.202	9.45192e-05	0.00257653	3-hydroxyanthranilate 3,4-dioxygenase
FE46_RS12165	-192.428	0.000167248	0.00269366	HIT family hydrolase
FE46_RS12285	-191.003	0.000107738	0.00257653	beta-lactamase
FE46_RS04190	-190.642	0.000369809	0.00335492	Chalcone isomerase-like
FE46_RS05985	-189.712	0.00251108	0.0160092	Helix-turn-helix domain
FE46_RS12260	-189.559	0.00015059	0.00264041	Protein of unknown function (DUF2480)
FE46_RS10360	-189.267	0.000109259	0.00257653	diaminopimelate epimerase
FE46_RS02935	-188.414	0.000245499	0.00289801	hypothetical protein
FE46_RS10090	-188.102	0.00010431	0.00257653	cytochrome cbb3 oxidase maturation protein CcoH
FE46_RS01850	-186.076	0.000178756	0.00270438	Domain of unknown function (DUF4357)
FE46_RS10800	-186.029	0.000252126	0.00291329	CoA-binding protein
FE46_RS09775	-184.603	0.000102934	0.00257653	dihydroorotase
FE46_RS11490	-184.565	0.000301404	0.0030258	endonuclease
FE46_RS10300	-184.372	0.000192576	0.00276096	hypothetical protein
FE46_RS00010	-183.657	0.000114634	0.00257653	rRNA maturation RNase YbeY
FE46_RS12550	-183.268	0.000134873	0.00257653	Cytochrome C biosynthesis protein
FE46_RS00720	-182.92	0.000118436	0.00257653	Metallophosphatase
FE46_RS12410	-182.904	0.000136321	0.00257744	ABC transporter permease
FE46_RS10325	-182.76	0.000120253	0.00257653	Chromosomal replication initiator
FE46_RS01215	-181.842	9.63297e-05	0.00257653	Protein of unknown function (DUF3108)
FE46_RS00385	-180.6	0.000142562	0.00258066	Di-haem oxidoreductase, putative peroxidase
FE46_RS00595	-178.413	0.000141039	0.00257744	G-D-S-L family lipolytic protein
FE46_RS08855	-178.32	0.000235558	0.00286727	Major facilitator superfamily
FE46_RS10010	-178.29	0.000332262	0.00315046	FIG034863: hypothetical protein
FE46_RS08560	-177.627	0.000105368	0.00257653	glycosyl transferase, family 2
FE46_RS08480	-177.058	0.000119796	0.00257653	Dehydrogenase
FE46_RS09555	-177.003	0.00241252	0.015517	FIG00651415: hypothetical protein
FE46_RS08280	-175.786	0.000107192	0.00257653	replicative DNA helicase
FE46_RS06270	-173.417	0.00012524	0.00257653	Excinuclease ABC subunit B
FE46_RS05045	-172.479	0.000261958	0.00293101	Pyrophosphatase
FE46_RS07545	-171.784	0.000160912	0.00266482	Phosphoheptose isomerase
FE46_RS09975	-170.484	0.000108156	0.00257653	Glycosyl transferase family 2
FE46_RS10330	-170.056	0.0022246	0.0145539	Belongs to the low molecular weight phosphotyrosine protein phosphatase family
FE46_RS04865	-169.22	0.000199433	0.00277712	synthase
FE46_RS00430	-168.355	0.000134718	0.00257653	hypothetical protein
FE46_RS03025	-167.47	0.000129925	0.00257653	Phage derived protein Gp49-like (DUF891)
FE46_RS03110	-165.501	0.000131633	0.00257653	hypothetical protein
FE46_RS08370	-164.666	0.000347899	0.00324748	hypothetical protein
FE46_RS09155	-164.632	0.000400601	0.00356013	3-deoxy-D-manno-octulosonate 8-phosphate phosphatase
FE46_RS08315	-164.043	0.000278609	0.0029759	Phosphatidylserine decarboxylase
FE46_RS05710	-162.603	0.000123715	0.00257653	Domain of unknown function (DUF4349)
FE46_RS03530	-162.41	0.000112593	0.00257653	Belongs to the MurCDEF family
FE46_RS01845	-161.889	0.000306009	0.0030258	guanylate kinase
FE46_RS04435	-161.812	0.000134124	0.00257653	Protein of unknown function (DUF1569)
FE46_RS09515	-161.578	0.000122861	0.00257653	TonB-dependent Receptor Plug Domain
FE46_RS12160	-160.897	0.000290853	0.00302092	transcription elongation factor
FE46_RS12960	-160.774	0.00263151	0.0165521	VanZ like family
FE46_RS05620	-160.773	0.000174766	0.0026995	Glycosyltransferase like family 2
FE46_RS03460	-159.927	0.000233869	0.00286727	NAD(+) synthase
FE46_RS09520	-156.643	0.000421554	0.00367091	Cytochrome c oxidase, subunit II
FE46_RS12545	-156.52	0.000285373	0.00299815	Domain of unknown function (DUF4292)
FE46_RS12570	-155.461	0.000410955	0.00360323	YoeB-like toxin of bacterial type II toxin-antitoxin system
FE46_RS06760	-155.03	0.00037791	0.00338164	Phosphatidylethanolamine-binding protein
FE46_RS12105	-154.655	0.000133836	0.00257653	Thioredoxin
FE46_RS00260	-151.419	0.000178574	0.00270438	Acyltransferase
FE46_RS12495	-151.331	0.000201511	0.00277712	Lipopolysaccharide-assembly, LptC-related
FE46_RS05415	-150.89	0.000307061	0.0030258	Transporter
FE46_RS08695	-149.953	0.00264068	0.0165521	transcription antitermination factor NusB
FE46_RS08670	-149.384	0.000188667	0.00275051	Ndr family
FE46_RS08860	-148.842	0.000171422	0.00269366	Belongs to the KdsA family
FE46_RS01315	-148.774	0.000139385	0.00257744	ribosome small subunit-dependent GTPase A
FE46_RS01050	-148.509	0.000158409	0.00266482	Adenylate cyclase
FE46_RS08000	-147.41	0.00274717	0.0170664	Putative prokaryotic signal transducing protein
FE46_RS03125	-146.831	0.000208488	0.00281522	Belongs to the 'phage' integrase family
FE46_RS04300	-146.501	0.00017078	0.00269366	Belongs to the Fur family
FE46_RS09190	-145.329	0.000376362	0.00338124	COG0526, thiol-disulfide isomerase and thioredoxins
FE46_RS11420	-145.204	0.000197098	0.00277712	NADH-quinone oxidoreductase subunit I
FE46_RS04545	-143.362	0.000140463	0.00257744	primosomal N
FE46_RS03640	-143.156	0.00020173	0.00277712	hypothetical protein
FE46_RS03905	-141.08	0.000252597	0.00291329	(Lipo)protein
FE46_RS05075	-140.15	0.00272149	0.0169766	family transcriptional regulator
FE46_RS07275	-139.544	0.000355512	0.00329315	Belongs to the SUA5 family
FE46_RS04760	-138.811	0.000196315	0.00277712	Belongs to the thioredoxin family
FE46_RS04160	-136.997	0.000184416	0.00271124	Belongs to the sigma-70 factor family. ECF subfamily
FE46_RS11310	-136.279	0.000492254	0.00410739	hypothetical protein
FE46_RS04905	-135.513	0.000680906	0.00530616	hypothetical protein
FE46_RS00350	-135.44	0.000167544	0.00269366	16S rRNA (adenine(1518)-N(6)/adenine(1519)-N(6))-dimethyltransferase RsmA
FE46_RS10640	-135.161	0.0030756	0.0186041	extracellular matrix structural constituent
FE46_RS02905	-134.685	0.000272922	0.00297576	hypothetical protein
FE46_RS03535	-133.8	0.000298165	0.0030258	Cell division protein FtsQ
FE46_RS08010	-133.786	0.000302874	0.0030258	orotate phosphoribosyltransferase
FE46_RS11465	-133.648	0.00388444	0.0224003	NADH-quinone oxidoreductase subunit A
FE46_RS03420	-133.638	0.000163176	0.00266482	Belongs to the FPP GGPP synthase family
FE46_RS09995	-133.51	0.000230049	0.00286727	hypothetical protein
FE46_RS12365	-133.369	0.000414091	0.00361807	hypothetical protein
FE46_RS00395	-133.32	0.000162401	0.00266482	metal-dependent transcriptional regulator
FE46_RS04820	-130.699	0.000235919	0.00286727	Domain of unknown function (DUF4834)
FE46_RS02925	-126.639	0.00408906	0.0233725	hypothetical protein
FE46_RS04735	-126.114	0.00083594	0.00623352	carboxypeptidase-like regulatory domain-containing
FE46_RS03495	-126.017	0.00529008	0.02854	FtsL-like putative cell division protein
FE46_RS07510	-125.769	0.0030569	0.0185342	N-acetyl-alpha-D-glucosaminyl L-malate synthase
FE46_RS11505	-125.136	0.000465835	0.0039376	hypothetical protein
FE46_RS03425	-124.627	0.00021	0.00281522	Belongs to the sigma-70 factor family. ECF subfamily
FE46_RS02670	-124.28	0.000195671	0.00277712	DNA methylase
FE46_RS11180	-121.766	0.00352094	0.0208128	Phosphonate ABC transporter ATP-binding protein
FE46_RS11540	-121.52	0.000292929	0.00302092	Belongs to the class-I aminoacyl-tRNA synthetase family
FE46_RS02050	-121.464	0.000265595	0.00293101	SOS mutagenesis and repair protein UmuC
FE46_RS03720	-120.116	0.000202483	0.00277712	3-dehydroquinate dehydratase
FE46_RS07635	-119.871	0.00537947	0.0288424	Restriction endonuclease BglII
FE46_RS00290	-118.959	0.000255493	0.00293101	hypothetical protein
FE46_RS05510	-118.941	0.00496382	0.0271754	single-stranded DNA-binding protein
FE46_RS12330	-118.913	0.000637118	0.00504062	Ferredoxin
FE46_RS08890	-118.674	0.000455005	0.00387127	hypothetical protein
FE46_RS09360	-117.988	0.000247922	0.00289801	cobinamide kinase
FE46_RS09315	-117.599	0.00491592	0.02697	Domain of unknown function (DUF4252)
FE46_RS08015	-116.46	0.00370208	0.021686	Belongs to the Nudix hydrolase family
FE46_RS02645	-115.321	0.00469384	0.0260146	Helix-turn-helix domain
FE46_RS06210	-114.469	0.000241988	0.00288054	type II CRISPR-associated endonuclease Cas1
FE46_RS06530	-114.381	0.000459328	0.00389528	Histidinol-phosphate aminotransferase
FE46_RS00360	-113.785	0.000233492	0.00286727	Domain of unknown function (DUF4286)
FE46_RS07680	-113.633	0.000516475	0.00424131	Methyltransferase
FE46_RS04795	-113.492	0.000324766	0.0031472	NAD-dependent deacylase
FE46_RS09385	-112.282	0.000294872	0.00302447	Belongs to the sigma-70 factor family. ECF subfamily
FE46_RS05735	-111.857	0.00022253	0.00286727	Pregnancy-associated plasma protein-A
FE46_RS00045	-111.328	0.000497037	0.00413401	Cyclic nucleotide-binding domain
FE46_RS09170	-111.284	0.00465781	0.0259378	tRNA pseudouridine(38-40) synthase
FE46_RS06810	-109.327	0.00342459	0.0204294	Haem-NO-binding
FE46_RS00990	-109.326	0.000502225	0.00415997	enoyl-CoA hydratase
FE46_RS02995	-108.144	0.00406324	0.0232963	hypothetical protein
FE46_RS04680	-106.272	0.00345766	0.0205323	general stress protein
FE46_RS04050	-104.4	0.000287969	0.00301322	GSCFA domain-containing protein
FE46_RS11905	-104.244	0.00391371	0.022519	hypothetical protein
FE46_RS05560	-104.052	0.000308994	0.0030258	Pkd domain containing protein
FE46_RS05095	-103.968	0.000355929	0.00329315	Thiamine biosynthesis protein ThiF
FE46_RS00605	-103.766	0.00378568	0.021991	ATP synthase
FE46_RS07215	-103.522	0.00080127	0.00607981	Tyrosine phosphatase family
FE46_RS11305	-102.129	0.000764917	0.00583812	T9SS type A sorting domain-containing
FE46_RS05795	-100.45	0.00047749	0.00400999	hypothetical protein
FE46_RS10515	-100.177	0.000582709	0.00465271	Glycosyltransferase Family 4
FE46_RS09185	-99.5017	0.000330344	0.00315046	Domain of Unknown Function (DUF1599)
FE46_RS10775	-99.4219	0.000293361	0.00302092	Vi polysaccharide biosynthesis protein VipB TviC
FE46_RS11820	-99.2455	0.0047982	0.0264922	general secretion pathway protein
FE46_RS03100	-99.1928	0.00032906	0.00315046	hypothetical protein
FE46_RS07305	-98.1338	0.000360778	0.00331992	Protein of unknown function (DUF541)
FE46_RS03845	-98.0989	0.00033265	0.00315046	Belongs to the pseudouridine synthase RsuA family
FE46_RS00185	-97.9977	0.00114409	0.00820144	oxygen-dependent coproporphyrinogen oxidase
FE46_RS11275	-97.7238	0.00042889	0.00371412	Protein of unknown function (DUF1343)
FE46_RS08455	-97.6163	0.000402296	0.003563	cytochrome c peroxidase
FE46_RS06390	-97.4309	0.00470167	0.0260146	Preprotein translocase subunit SecA
FE46_RS03405	-96.9844	0.000486085	0.004069	O-methyltransferase
FE46_RS03250	-96.3022	0.00101329	0.00734493	Protein of unknown function (DUF420)
FE46_RS11515	-96.2533	0.00435045	0.0245422	Modulates RecA activity
FE46_RS01025	-94.3021	0.000434716	0.00374484	hypothetical protein
FE46_RS06600	-94.2834	0.000539918	0.00440489	Ketosteroid isomerase-related protein
FE46_RS04850	-94.1964	0.00406675	0.0232963	Ribonuclease Z
FE46_RS03590	-92.7308	0.000334045	0.00315217	Protein of unknown function (DUF2867)
FE46_RS07325	-92.7034	0.000816325	0.00614018	hypothetical protein
FE46_RS07390	-92.4316	0.00467927	0.0260015	Damage-inducible protein DinB
FE46_RS08475	-92.2047	0.00441165	0.0247797	Ribosomal RNA small subunit methyltransferase G
FE46_RS03470	-91.8295	0.00609725	0.0316447	Gliding motility protein GldC
FE46_RS05260	-91.8141	0.000807825	0.00609392	Belongs to the cytidylate kinase family. Type 1 subfamily
FE46_RS05120	-91.7221	0.000677859	0.00530616	SAM-dependent methyltransferase
FE46_RS00775	-91.4832	0.000726506	0.00561096	Phage integrase SAM-like domain
FE46_RS05540	-91.2758	0.000541487	0.00440489	Nucleoid-associated protein NdpA
FE46_RS11975	-91.0257	0.000503364	0.00415997	lipid-A-disaccharide synthase
FE46_RS12470	-90.9367	0.00122848	0.00859271	amidophosphoribosyltransferase
FE46_RS08225	-90.8721	0.00524639	0.028428	COG NOG23405 non supervised orthologous group
FE46_RS02260	-90.7385	0.00534906	0.0287388	thiamine biosynthesis protein ThiS
FE46_RS10405	-90.6938	0.00429616	0.0243418	hypothetical protein
FE46_RS05100	-90.548	0.000761378	0.00582825	family transcriptional regulator
FE46_RS02550	-90.4826	0.00714024	0.0351592	hypothetical protein
FE46_RS03525	-90.2264	0.000555451	0.00449033	UDP-N-acetylglucosamine--N-acetylmuramyl-(pentapeptide) pyrophosphoryl-undecaprenol N-acetylglucosamine transferase
FE46_RS08800	-89.5237	0.000444802	0.00379691	Anthranilate synthase
FE46_RS01300	-88.6887	0.00433795	0.024525	Psort location Cytoplasmic, score 8.96
FE46_RS02605	-88.0904	0.000899387	0.00664931	Transposase DDE domain
FE46_RS03440	-87.6735	0.000776751	0.00591106	domain, Protein
FE46_RS09295	-87.5378	0.00136012	0.00943723	MerR family transcriptional regulator
FE46_RS01740	-87.1331	0.00509585	0.0278394	dihydrofolate reductase
FE46_RS06775	-87.0209	0.00723087	0.0354587	ATP-binding
FE46_RS02635	-86.0189	0.00460856	0.0257741	Transposase
FE46_RS01065	-85.1575	0.00566447	0.0301215	ribonuclease HI
FE46_RS00435	-85.0397	0.000435816	0.00374484	epimerase
FE46_RS08160	-84.1327	0.000827625	0.00620719	GTP cyclohydrolase I
FE46_RS06715	-83.8652	0.00113209	0.00813787	3-hydroxyacyl-CoA dehydrogenase, C-terminal domain
FE46_RS11685	-81.9048	0.00488946	0.0268817	FIG00655207: hypothetical protein
FE46_RS08885	-81.7095	0.00710061	0.0350788	Acetyltransferase (GNAT) domain
FE46_RS08835	-81.1508	0.00525835	0.028428	neutral zinc metallopeptidase
FE46_RS01830	-81.1034	0.00670526	0.033656	16S rRNA processing
FE46_RS02425	-80.9822	0.00581279	0.0306305	Protein of unknown function (DUF3109)
FE46_RS06475	-80.5336	0.00118319	0.00832077	DUF6155 family protein
FE46_RS04955	-78.8134	0.00708135	0.0350788	Na+ H+ antiporter
FE46_RS07480	-78.641	0.00778122	0.037324	Thiol-disulfide oxidoreductase
FE46_RS07655	-78.4872	0.00726234	0.0354911	DUF6452 family protein
FE46_RS09425	-78.3298	0.00615357	0.0318108	Acetyltransferase
FE46_RS01015	-77.7901	0.00524894	0.028428	Belongs to the P-Pant transferase superfamily
FE46_RS11890	-77.6999	0.00669636	0.033656	hypothetical protein
FE46_RS01010	-77.4911	0.000667786	0.00525123	Geranylgeranylglyceryl diphosphate synthase
FE46_RS07075	-77.4474	0.00708773	0.0350788	Domain of unknown function (DUF4258)
FE46_RS05285	-77.4113	0.000714665	0.00553598	3-dehydroquinate synthase
FE46_RS01190	-77.3092	0.0005484	0.00444718	excinuclease ABC subunit UvrC
FE46_RS06455	-76.925	0.000703038	0.00546223	DNA polymerase III
FE46_RS07140	-76.8228	6.55049e-06	0.000314787	hypothetical protein
FE46_RS00250	-76.7158	0.00104798	0.00757522	phosphohydrolase
FE46_RS02890	-76.6379	0.00644911	0.0327504	hypothetical protein
FE46_RS10725	-76.5903	0.0058192	0.0306305	WxcM-like, C-terminal
FE46_RS10650	-76.2606	0.00093652	0.00686517	PorT family protein
FE46_RS12200	-76.0273	0.00568779	0.0301837	DUF423 domain-containing
FE46_RS04985	-75.9317	0.000679993	0.00530616	23S rRNA (adenine(1618)-N(6))-methyltransferase
FE46_RS00175	-75.7506	0.00605466	0.0314867	Belongs to the ALAD family
FE46_RS03735	-74.7845	0.000834583	0.00623352	Murein transglycosylase
FE46_RS12430	-74.353	0.00635734	0.032475	rod shape-determining protein MreD
FE46_RS02915	-73.9398	0.000927062	0.00681509	Hypothetical transmembrane
FE46_RS01070	-73.6375	0.00056299	0.00452309	phosphoribosylglycinamide formyltransferase
FE46_RS09565	-73.5523	0.000838778	0.00623676	C-terminal domain of CHU protein family
FE46_RS13265	-73.5226	0.00563632	0.0300952	RNA-binding protein
FE46_RS06220	-73.4138	0.00615376	0.0318108	Transcriptional regulator
FE46_RS11705	-73.0021	0.00581693	0.0306305	Dialkylrecorsinol condensing enzyme
FE46_RS00190	-72.5689	0.00640986	0.0326149	Protein of unknown function (DUF3575)
FE46_RS05525	-72.356	0.0010108	0.00734493	C-terminal domain of CHU protein family
FE46_RS05390	-72.2392	0.000925555	0.00681509	Histidine kinase
FE46_RS12695	-71.9865	0.00116474	0.00825822	uracil phosphoribosyltransferase
FE46_RS03780	-71.4686	0.00117585	0.00829164	Aminotransferase class IV
FE46_RS03430	-71.0758	0.00603343	0.0314392	hypothetical protein
FE46_RS06085	-70.4746	0.00692813	0.0344416	hypothetical protein
FE46_RS04060	-70.3365	0.00205871	0.0137658	ABC transporter
FE46_RS03680	-69.5804	0.0079338	0.0379157	haloacid dehalogenase
FE46_RS06915	-68.4778	0.000990135	0.00723775	ABC transporter substrate-binding protein
FE46_RS03675	-68.3246	0.000738762	0.00568868	Uncharacterized protein family UPF0029
FE46_RS09640	-68.1756	0.0024422	0.0156482	permease
FE46_RS09915	-67.4969	0.00865529	0.0406893	WbqC-like protein
FE46_RS07340	-66.7844	0.00183707	0.0123335	Histidine kinase-like ATPases
FE46_RS11535	-66.4403	0.00115286	0.00822469	1-acyl-sn-glycerol-3-phosphate acyltransferase
FE46_RS01955	-66.3541	0.00656306	0.0330702	Cysteine methyltransferase
FE46_RS04170	-65.3185	0.0109104	0.049239	Amino acid permease
FE46_RS10705	-64.5279	0.00106671	0.00768923	Bacterial sugar transferase
FE46_RS10095	-64.4902	0.00692437	0.0344416	sulfite exporter family
FE46_RS07500	-64.3756	0.00711038	0.0350788	DJ-1/PfpI family
FE46_RS05600	-64.0756	0.006555	0.0330702	Belongs to the CDP-alcohol phosphatidyltransferase class-I family
FE46_RS06365	-64.0499	0.00733763	0.0357916	YsiA-like protein, C-terminal region
FE46_RS00840	-63.7347	0.000637068	0.00504062	Belongs to the ompA family
FE46_RS04490	-63.6003	0.00119013	0.00834701	Glycosyl transferases group 1
FE46_RS08425	-63.5177	0.00779986	0.0373443	Methyltransferase domain
FE46_RS02025	-63.1333	0.00845917	0.0401308	UPF0339 protein YegP.N / UPF0339 protein YegP.C
FE46_RS01915	-62.9264	0.00171664	0.0116615	phosphate ABC transporter permease subunit
FE46_RS11165	-62.2006	0.00151535	0.0104306	Glycosyl transferase family 2
FE46_RS08355	-61.3239	0.00738254	0.0359432	membrane insertion efficiency factor
FE46_RS09990	-61.1889	0.00942901	0.0435379	hypothetical protein
FE46_RS08265	-61.1875	0.0021395	0.0141633	Transposase, Mutator family
FE46_RS02365	-60.6829	0.00132927	0.00924787	acetolactate synthase large subunit
FE46_RS03710	-60.5722	0.00935578	0.043354	Tyrosine recombinase XerC
FE46_RS05555	-60.3331	0.00127473	0.00889226	Pkd domain containing protein
FE46_RS00165	-60.1562	0.00835798	0.0397234	methylated-DNA--[protein]-cysteine S-methyltransferase
aroE	-59.7865	0.00169071	0.0115155	shikimate dehydrogenase
FE46_RS09810	-59.7779	0.00292068	0.0179601	endonuclease III
FE46_RS05030	-59.7697	0.00960238	0.044175	Haem-degrading
FE46_RS08290	-59.5371	0.00263791	0.0165521	permease
FE46_RS11270	-59.4368	0.00762526	0.0367116	permease
FE46_RS04165	-59.0793	0.00206354	0.0137658	NADH dehydrogenase
FE46_RS04245	-59.0737	0.00833607	0.0396919	23S rRNA-intervening sequence protein
FE46_RS05475	-58.8671	0.00853234	0.0402571	ferritin-like domain-containing
FE46_RS02150	-58.6224	0.00962675	0.044175	hypothetical protein
FE46_RS09895	-58.6222	0.00963509	0.044175	Septum formation initiator
FE46_RS00610	-58.5227	0.00724204	0.0354587	hypothetical protein
FE46_RS12595	-58.4756	0.00744718	0.0361692	Polysaccharide biosynthesis protein
FE46_RS01930	-58.2853	0.00298016	0.0181965	Plays a role in the regulation of phosphate uptake
FE46_RS05905	-58.2503	0.00927016	0.0431112	Protein of unknown function (DUF1572)
FE46_RS04055	-57.6876	0.00178537	0.0120652	hypothetical protein
FE46_RS05090	-57.6095	0.00218255	0.0144115	hydrolase, TatD
FE46_RS00750	-57.5792	0.00183582	0.0123335	TonB-dependent receptor
FE46_RS04790	-56.5203	0.00378403	0.021991	RNA methyltransferase
FE46_RS07230	-56.477	0.00876265	0.041114	hypothetical protein
FE46_RS01960	-56.4253	0.0085024	0.040189	Sporulation protein
FE46_RS06020	-56.4011	0.00457901	0.0256642	AAA domain
FE46_RS07890	-56.3711	0.0100603	0.0457206	hypothetical protein
FE46_RS05665	-56.1129	0.00863762	0.0406799	Polysaccharide deacetylase
FE46_RS10575	-55.6538	0.00241574	0.015517	Glycosyl transferase family 2
FE46_RS03650	-55.637	0.0100546	0.0457206	Metal transporter
FE46_RS01835	-55.3494	0.00210032	0.0139395	methyltransferase
FE46_RS07020	-53.759	0.00925265	0.0431071	hypothetical protein
FE46_RS12565	-53.7374	0.0023004	0.0149239	hypothetical protein
FE46_RS02410	-53.1999	0.00624537	0.0320925	50S ribosomal L13
FE46_RS13015	-52.9477	0.0105286	0.0476817	hypothetical protein
FE46_RS10530	-52.7493	0.0023659	0.0152724	Protein of unknown function (DUF1698)
FE46_RS07170	-52.4453	0.00285982	0.0176762	Mechanosensitive ion channel
FE46_RS12390	-52.3853	0.00183933	0.0123335	Belongs to the ompA family
FE46_RS00450	-52.0346	0.0037624	0.0219897	Cytochrome C oxidase assembly protein
FE46_RS02700	-51.4671	0.010032	0.0457206	DDE domain
FE46_RS03805	-51.4001	0.00354921	0.0209323	DNA replication and repair protein recF
FE46_RS03865	-50.3547	0.00274903	0.0170664	inward rectifier potassium channel Irk
FE46_RS05155	-50.2776	0.00333354	0.0199321	Cystathionine beta-lyase
FE46_RS03015	-49.7011	0.00361049	0.0212454	Hypothetical transmembrane
FE46_RS01360	-49.2056	0.00410519	0.0234131	O-acetyl-L-homoserine sulfhydrolase
FE46_RS01285	-47.7888	0.00440672	0.0247797	3-phosphoshikimate 1-carboxyvinyltransferase
FE46_RS03645	-47.2355	0.00464278	0.0259097	TonB-dependent receptor
FE46_RS07875	-47.0324	0.00381631	0.0221057	Type IX secretion system membrane protein PorP/SprF
FE46_RS01910	-46.9512	0.00345718	0.0205323	PBP superfamily domain
FE46_RS10185	-46.3403	0.00630497	0.0322916	50S ribosomal L11
FE46_RS00040	-45.7646	0.00590766	0.030908	DinB superfamily
FE46_RS10275	-45.5396	0.00161563	0.0110621	Starch-binding associating with outer membrane
FE46_RS07790	-44.0558	0.00256458	0.0162319	Dihydrolipoyl dehydrogenase
FE46_RS10975	-42.6932	0.00638257	0.0325398	50S ribosomal L4
FE46_RS04185	-42.6607	0.00566154	0.0301215	anhydro-N-acetylmuramic acid kinase
FE46_RS10945	-42.3091	0.00803125	0.0383108	MULTISPECIES: 50S ribosomal protein L16
FE46_RS09950	-41.7615	0.00428181	0.0243136	short-chain dehydrogenase
FE46_RS10280	-40.9173	1.17068e-05	0.000514902	TonB-dependent receptor
FE46_RS08310	-40.2193	0.00942144	0.0435379	superoxide dismutase
FE46_RS06055	-39.9084	0.0107182	0.0484561	Putative ATP-dependent DNA helicase recG C-terminal
FE46_RS00885	-39.6737	0.00916247	0.0427637	leucine-rich repeat protein
FE46_RS04770	-38.4033	0.00768999	0.0369547	Outer membrane efflux protein
FE46_RS01780	-36.0505	0.00717615	0.0352692	Electron transfer flavoprotein
FE46_RS11210	-35.9782	0.00570083	0.0301911	pyruvate dehydrogenase (acetyl-transferring) E1 component subunit alpha
FE46_RS10235	-35.1933	0.00656156	0.0330702	30S ribosomal S21
FE46_RS12205	-34.5559	0.00681779	0.0340234	phosphoenolpyruvate carboxykinase (ATP)
FE46_RS12795	-34.5219	0.0051888	0.0282284	ribonuclease R
FE46_RS10980	-33.859	0.00329907	0.0197716	50S ribosomal L3
ssrA	-32.9982	3.81444e-05	0.00137479	hypothetical protein FF52_20000
FE46_RS00065	-32.6163	0.000473799	0.00399191	domain, Protein
FE46_RS00325	-32.585	0.00558318	0.0298729	glycerol acyltransferase
FE46_RS03385	-32.2608	0.00848322	0.0401715	ATP-dependent Clp endopeptidase proteolytic subunit
FE46_RS03330	-31.709	0.006206	0.0319946	outer membrane assembly factor
FE46_RS10965	-30.7821	0.00363788	0.0213581	50S ribosomal L2
FE46_RS05885	-29.2854	0.00349763	0.0207223	hypothetical protein
FE46_RS02405	-28.4649	0.006309	0.0322916	Belongs to the universal ribosomal protein uS9 family
FE46_RS12395	-27.8064	0.0100155	0.0457206	type IX secretion system membrane
FE46_RS08730	-27.542	0.00956952	0.0441082	DNA topoisomerase (ATP-hydrolyzing) subunit B
rnpB	-27.2386	0.000162071	0.00266482	hypothetical protein
FE46_RS10950	-25.5037	0.00757216	0.0365917	MULTISPECIES: 30S ribosomal protein S3
sdhA	-24.5191	0.000618025	0.00491956	succinate dehydrogenase
FE46_RS01485	-24.3992	0.00516155	0.0281391	Fungalysin metallopeptidase (M36)
FE46_RS01435	-23.8423	0.00247687	0.0158312	Belongs to the Glu Leu Phe Val dehydrogenases family
FE46_RS03945	-21.9226	0.00931322	0.043234	Gliding motility protein GldK
FE46_RS12935	-19.123	0.00270466	0.0169123	C-terminal domain of CHU protein family
FE46_RS12400	-18.9152	0.00220516	0.0144871	C-terminal domain of CHU protein family
FE46_RS04175	-18.5647	0.00755452	0.0365746	aminoacyl-histidine dipeptidase
FE46_RS02085	-18.407	0.00532111	0.0286479	Protein of unknown function (DUF1573)
FE46_RS06290	-18.2302	0.0028677	0.0176762	ADP-forming succinate-- ligase subunit beta
FE46_RS04450	-18.0355	0.00305015	0.0185342	NADP-dependent isocitrate dehydrogenase
FE46_RS10990	-17.7621	0.00378804	0.021991	elongation factor G
FE46_RS11230	-17.6787	0.00621399	0.0319946	Gliding motility protein GldJ
FE46_RS04180	-17.5139	0.00996823	0.0456218	acyl-CoA dehydrogenase
FE46_RS10145	-16.7553	0.000441011	0.00377698	Pkd domain containing protein
FE46_RS11355	-16.6494	0.00417399	0.0237533	Flagellar motor protein MotA
FE46_RS04855	-15.1993	0.00588914	0.0308734	30S ribosomal S1
FE46_RS10110	-14.5035	0.000645942	0.00509489	aconitate hydratase
FE46_RS09550	-13.8227	0.000804033	0.00608299	hypothetical protein
FE46_RS09435	-13.3987	0.00485996	0.0267762	signal recognition particle
FE46_RS03955	-13.3639	0.00115368	0.00822469	Gliding motility protein GldM
FE46_RS02480	-12.6495	0.00150507	0.0103874	translation initiation factor IF-2
FE46_RS11000	-12.2212	0.011071	0.0498771	30S ribosomal S12
FE46_RS01085	-11.5717	0.00877732	0.041114	beta-ketoacyl-ACP synthase II
FE46_RS10205	-11.0914	0.00086403	0.00640617	elongation factor Tu
FE46_RS10880	-10.5805	0.00219178	0.0144357	pre translocase subunit
FE46_RS11250	-8.58997	0.0029479	0.018042	Cell wall-associated hydrolase
FE46_RS02245	-7.38447	0.00673356	0.0337268	Acetyl-CoA hydrolase/transferase N-terminal domain
FE46_RS11990	-7.26391	0.0101407	0.0460054	Belongs to the peptidase S41A family
FE46_RS05270	6.67207	0.00762205	0.0367116	DNA primase
FE46_RS07180	7.97563	0.00880057	0.0411486	Belongs to the aldehyde dehydrogenase family
FE46_RS08540	8.27518	0.00584604	0.0307095	HRDC domain
FE46_RS11440	8.46661	0.00315622	0.0190474	NADH-quinone oxidoreductase subunit
FE46_RS04780	8.73681	0.00674536	0.0337268	Belongs to the resistance-nodulation-cell division (RND) (TC 2.A.6) family
FE46_RS08470	9.8575	0.00319564	0.0192406	N/A
FE46_RS09390	10.6022	0.00225258	0.014687	Gram-negative bacterial TonB protein C-terminal
FE46_RS02060	11.1342	0.00388193	0.0224003	hypothetical protein
FE46_RS04405	13.8849	0.00321732	0.0193262	Outer membrane protein beta-barrel family
FE46_RS05135	14.5559	0.00154658	0.0106174	LETM1-like protein
FE46_RS05675	16.6544	0.000758687	0.00582483	Glycosyltransferase Family 4
FE46_RS01645	17.5484	0.0009983	0.00727694	TspO/MBR family
FE46_RS12450	17.6809	0.000429378	0.00371412	hypothetical protein
FE46_RS04815	24.2667	7.29106e-05	0.00225242	Putative MetA-pathway of phenol degradation
FE46_RS08195	71.7368	0.00651219	0.0330061	hypothetical protein
FE46_RS13210	346.961	0.00745686	0.0361692	Belongs to the 'phage' integrase family
FE46_RS07700	425.347	0.00602318	0.0314392	DUF6095 family protein
FE46_RS04430	895.553	0.000580038	0.00464568	hypothetical protein
FE46_RS03790	1151.56	0.00222655	0.0145539	N/A
FE46_RS06070	2935.18	5.95151e-08	1.25855e-05	hypothetical protein
FE46_RS09275	3394.02	0.00115823	0.00823454	hypothetical protein
