# Supplementary material for: Dual RNA-Seq of Flavobacterium psychrophilum and Its Outer Membrane Vesicles Distinguishes Genes Associated with Susceptibility to Bacterial Cold-Water Disease in Rainbow Trout (Oncorhynchus mykiss)
Source: Pathogens. 2023 Mar 10;12(3):436. doi: 10.3390/pathogens12030436 (PMC10057207; doi:10.3390/pathogens12030436)
Supplement: Supplementary file 1 [file pathogens-12-00436-s001.zip › Supplementary file S3b.xlsx]

## Sheet: All strains
Additional file S3: CWH conservation in different Fp strains
Strain	Conservation status
17830	Yes
160401-1_5N	Yes
950106-1	Yes
CH1895	Yes
CH8	Yes
CN	Yes
CR	Yes
DK001	Yes
DK002	Yes
DK095	Yes
DSM 3660	Yes
FI056	Yes
FI070	Yes
FI146	Yes
5	Yes
FI166	Yes
FPC 840	Yes
FPCH6	Yes
FPG101	Yes
FPG102	Yes
FPG103	Yes
FPG3	Yes
FPG48	Yes
FPG87	Yes
FPS-S6	Yes
FRGDSA 1882/11	Yes
IT02	Yes
IT09	Yes
JIP 08/99	Yes
JIP 16/00	Yes
JIP02/86	Yes
KHIR-1705	Yes
KK0K-1706	Yes
KTEN-1510	Yes
KU 051128-10	Yes
KU 060626-59	Yes
KU061128-1	Yes
LM-01-FP	Yes
LM-02-FP	Yes
MH1	Yes
NNS2	Yes
NNS5	Yes
NO014	Yes
NO014	Yes
NO042	Yes
NO083	Yes
THC-02-90	Yes
V4-33	Yes
VQ50	Yes
4	No
10	No
11754	No
DK150	No
FPC 831	No
FPG10	No
FPG1W08	No
FPG92	No
ITWL08	No
KU060626-4	No
LV DJ XP189	No
NO004	No
NO004	No

## Sheet: High virulent & low virulent
Additional file S3: CWH conservation in high and low virulent strains
HIGH VIRULENT STRAIN	Conservation status	LOW VIRULENT STRAIN	Conservation status
FPG10	No	CR	Yes
FPG101	Yes	FPG3	Yes
FPS-S6	Yes	FPG1W08	No
THCO2-90	Yes	NCIMB 1947 (ATCC 49418 =DSM 3660 )	Yes
JIP 08/99	Yes
JIP 16/00	Yes
JIP02/86	Yes
950106-1	Yes
